# Supplementary material
Source: PubMed Central journal article supplement (PMC6442930)

---

## Table of Contents

|                                                                                                                             |     |
|-----------------------------------------------------------------------------------------------------------------------------|-----|
| General Considerations.....                                                                                                 | S2  |
| Reaction Discovery, Optimization, and Control Reactions.....                                                                | S3  |
| Trifluoromethanesulfonamide Synthesis and Characterization.....                                                             | S4  |
| Photoredox-Catalyzed $\alpha$ -C( <i>sp</i> <sup>3</sup> )-H Alkylation (Alkene and Trifluoromethanesulfonamide Scope)..... | S18 |
| Mechanistic Investigations.....                                                                                             | S38 |
| NMR spectra .....                                                                                                           | S55 |

---

## General Considerations

Commercial reagents and anhydrous solvents were purchased from Sigma-Aldrich, Alfa and TCI, and were used as received unless otherwise indicated. All catalytic reactions were carried out under N<sub>2</sub> with oven-dried vials. Thin layer chromatography was performed on SiliCycle<sup>®</sup> 250 μm, 60 Å plates. Silica gel column chromatography was performed on SiliCycle<sup>®</sup>/SilicaFlash<sup>®</sup> P60, 40-63 μm, 60 Å. Visualization was accomplished with Seebach's "magic" stain.

Unless otherwise noted, <sup>1</sup>H NMR (400 MHz), <sup>13</sup>C NMR (100 MHz), and <sup>19</sup>F NMR (376 MHz) spectra were taken on a Bruker 400 MHz spectrometer at ambient temperature and were recorded in CDCl<sub>3</sub>. Chemical shifts (δ) are in parts per million relative to chloroform at 7.26 ppm for <sup>1</sup>H and relative to CDCl<sub>3</sub> at 77.16 for <sup>13</sup>C. Data for <sup>1</sup>H, and <sup>19</sup>F NMR are reported as follows: chemical shift (δ ppm), multiplicity (s = singlet, d = doublet, t = triplet, q = quartet, m = multiplet, brs = broad singlet), coupling constant (Hz), integration. Data for <sup>13</sup>C NMR are reported as follows: chemical shift (δ ppm). Several spectra are from mixtures of rotamers and deconvolution is not possible. High resolution mass spectra (HRMS) were obtained from Columbia University Mass Spectrometry Facility on a JOEL JMSHX110HF mass spectrometer using ESI<sup>+</sup>/ESI<sup>-</sup>/ASAP<sup>-</sup> ionization model. Infrared spectra were recorded on a Perkin Elmer Paragon 1000 FT-IR spectrometer. Stern-Volmer luminescence quenching experiments were conducted on a Perkin Elmer LS-55.

All alkenes were purchased from Aldrich and used as received. All trifluoromethanesulfonamide substrates were synthesized according to the general methods as shown below.

## Reaction Discovery, Optimization, and Control Reactions

### Initial Result:

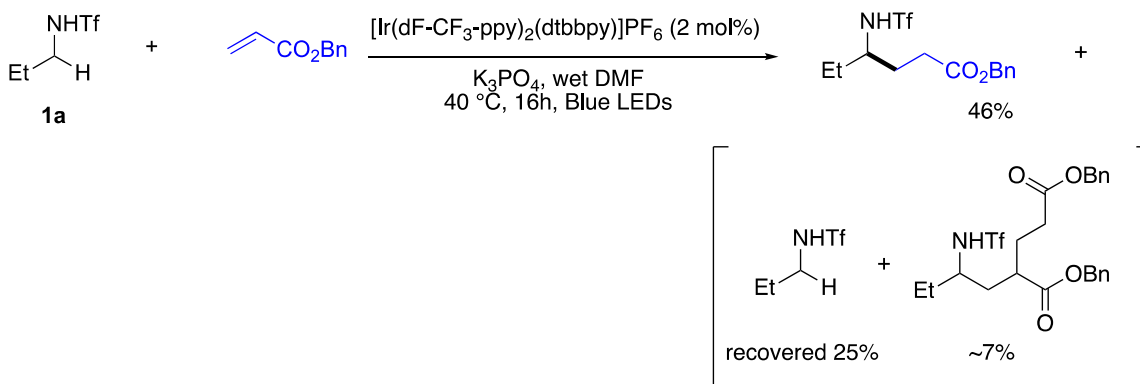

### Optimization:

Reactions were run on 0.1mmol scale (**1a**), with alkene (0.15 or 0.3 mmol), photocatalyst (2.0 mol%), base (0.2 mmol) in solvent (0.2M) at 40 °C for 16h.

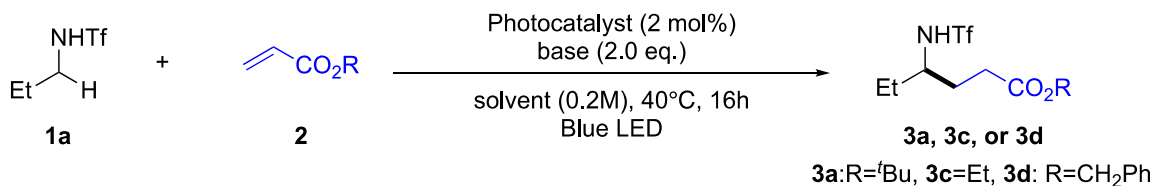

|    | Photocatalyst                                                                                         | R                  | solvent | base                           | yield |
|----|-------------------------------------------------------------------------------------------------------|--------------------|---------|--------------------------------|-------|
| 1  | [Ir{dF-(CF <sub>3</sub> )ppy} <sub>2</sub> (bpy)]PF <sub>6</sub>                                      | CH <sub>2</sub> Ph | DMF     | K <sub>3</sub> PO <sub>4</sub> | 16%   |
| 2  | [Ir{dF-(CF <sub>3</sub> )ppy} <sub>2</sub> (3,3'-(CF <sub>3</sub> ) <sub>2</sub> bpy)]PF <sub>6</sub> | CH <sub>2</sub> Ph | DMF     | K <sub>3</sub> PO <sub>4</sub> | 38%   |
| 3  | [Ir{dF-(CF <sub>3</sub> )ppy} <sub>2</sub> (dtbbpy)]PF <sub>6</sub>                                   | CH <sub>2</sub> Ph | DMF     | K <sub>3</sub> PO <sub>4</sub> | 58%   |
| 4  | [Ir{dF-(CH <sub>3</sub> )ppy} <sub>2</sub> (dtbbpy)]PF <sub>6</sub>                                   | CH <sub>2</sub> Ph | DMF     | K <sub>3</sub> PO <sub>4</sub> | 65%   |
| 5  | [Ir{dFppy} <sub>2</sub> (dtbbpy)]PF <sub>6</sub>                                                      | CH <sub>2</sub> Ph | DMF     | K <sub>3</sub> PO <sub>4</sub> | 64%   |
| 6  | [Ir{dF-(CH <sub>3</sub> )ppy} <sub>2</sub> (dtbbpy)]PF <sub>6</sub>                                   | Et                 | DMF     | K <sub>3</sub> PO <sub>4</sub> | 65%   |
| 7  | [Ir{dF-(CH <sub>3</sub> )ppy} <sub>2</sub> (dtbbpy)]PF <sub>6</sub>                                   | tBu                | DMF     | K <sub>3</sub> PO <sub>4</sub> | 68%   |
| 8  | [Ir{dF-(CH <sub>3</sub> )ppy} <sub>2</sub> (dtbbpy)]PF <sub>6</sub>                                   | tBu                | DMF     | quinuclidine                   | 77%   |
| 9  | [Ir{dF-(CF <sub>3</sub> )ppy} <sub>2</sub> (dtbbpy)]PF <sub>6</sub>                                   | tBu                | DMF     | quinuclidine                   | 71%   |
| 10 | [Ir{dF-(OMe)ppy} <sub>2</sub> (dtbbpy)]PF <sub>6</sub>                                                | tBu                | DMF     | quinuclidine                   | 70%   |
| 11 | [Ir{dFppy} <sub>2</sub> (dtbbpy)]PF <sub>6</sub>                                                      | tBu                | DMF     | quinuclidine                   | 68%   |

|    |                                                                     |             |                    |                    |       |
|----|---------------------------------------------------------------------|-------------|--------------------|--------------------|-------|
| 12 | [Ir{dF-(CH <sub>3</sub> )ppy} <sub>2</sub> (dtbbpy)]PF <sub>6</sub> | <i>t</i> Bu | DMF                | DABCO              | 17%   |
| 13 | [Ir{dF-(CH <sub>3</sub> )ppy} <sub>2</sub> (dtbbpy)]PF <sub>6</sub> | <i>t</i> Bu | DMF                | 3-OAc-quinuclidine | 50%   |
| 14 | [Ir{dF-(CH <sub>3</sub> )ppy} <sub>2</sub> (dtbbpy)]PF <sub>6</sub> | <i>t</i> Bu | DMF                | 3-OH-quinuclidine  | trace |
| 15 | [Ir{dF-(CH <sub>3</sub> )ppy} <sub>2</sub> (dtbbpy)]PF <sub>6</sub> | <i>t</i> Bu | DMF                | Et <sub>3</sub> N  | 0%    |
| 16 | [Ir{dF-(CH <sub>3</sub> )ppy} <sub>2</sub> (dtbbpy)]PF <sub>6</sub> | <i>t</i> Bu | toluene            | quinuclidine       | 48%   |
| 17 | [Ir{dF-(CH <sub>3</sub> )ppy} <sub>2</sub> (dtbbpy)]PF <sub>6</sub> | <i>t</i> Bu | CF <sub>3</sub> Ph | quinuclidine       | 32%   |

Table S1. Reaction Optimization

### Control Reactions:

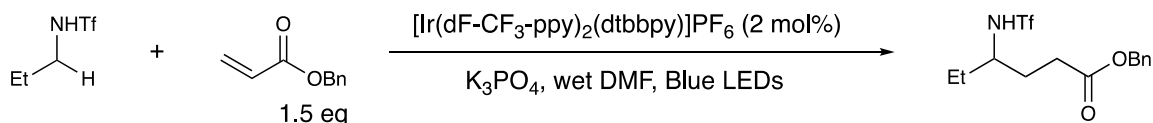

| Trial | Deviation from Std Conditions | Yield Desired Pdt (%) |
|-------|-------------------------------|-----------------------|
| a     | No photocatalyst              | 0                     |
| b     | No base                       | 0                     |
| c     | No light                      | 0                     |

Table S2. Control Reactions

## Trifluoromethanesulfonamide Synthesis and Characterization

**Procedure A:** To a solution of amine (1.0 equiv.) and NEt<sub>3</sub> (1.5 equiv.) in DCM (0.25 M) was added trifluoromethanesulfonic anhydride (1.0 equiv.) at 0 °C. The mixture was slowly warmed to ambient temperature and stirred overnight. The reaction was quenched with sat. NH<sub>4</sub>Cl aq. Organic compounds were extracted with DCM twice. The combined organic layer was washed with sat. NaHCO<sub>3</sub> and brine, dried over Na<sub>2</sub>SO<sub>4</sub>, and filtered. The solvent was removed under reduced pressure. The residue was purified by flash column chromatography using hexane/EtOAc as an eluent.

---

### 1,1,1-trifluoro-*N*-propylmethanesulfonamide (1a)

Prepared according to **Procedure A** from commercially available propylamine (1.00 g, 16.9 mmol). Colorless oil (2.28 g, 71% yield).  $R_f = 0.37$  (9:1 hex:EtOAc).

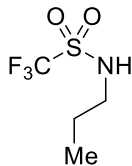

$^1\text{H NMR}$  ( $\text{CDCl}_3$ , 400 MHz)  $\delta$  5.20 (brs, 1H), 3.25 (t,  $J = 7.0$  Hz, 2H), 1.63 (sext,  $J = 7.4$  Hz, 2H), 0.96 (t,  $J = 7.4$  Hz, 2H);  $^{13}\text{C NMR}$  ( $\text{CDCl}_3$ , 100 MHz): 119.7 (q,  $J = 319$ ), 46.1, 23.4, 10.6;  $^{19}\text{F NMR}$  ( $\text{CDCl}_3$ , 376 MHz):  $-77.6$ ; **IR (neat)** 3313(*s*), 2973(*m*), 2884(*m*), 1431(*s*), 1365(*s*), 1229(*s*), 1187(*s*), 1142(*s*), 1069(*s*), 1012(*s*), 609(*s*)  $\text{cm}^{-1}$ ; **HRMS-ASAP** (negative):  $M = \text{C}_4\text{H}_8\text{F}_3\text{NO}_2\text{S}$ ; expected  $(M-H)^- m/z$  190.0150, observed  $(M-H)^- m/z$  190.0148.

### *N*-butyl-1,1,1-trifluoromethanesulfonamide (1b)

Prepared according to **Procedure A** from commercially available butylamine (731 mg, 10.0 mmol). Colorless oil (1.31 g, 64% yield).  $R_f = 0.38$  (9:1 hex:EtOAc).

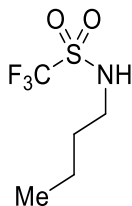

$^1\text{H NMR}$  ( $\text{CDCl}_3$ , 400 MHz)  $\delta$  5.17 (brs, 1H), 3.28 (q,  $J = 6.6$  Hz, 2H), 1.58 (m, 2H), 1.38 (m, 2H), 0.93 (t,  $J = 7.3$  Hz, 3H);  $^{13}\text{C NMR}$  ( $\text{CDCl}_3$ , 100 MHz): 119.7 (q,  $J = 319$ ), 44.2, 32.0, 19.3, 13.3;  $^{19}\text{F NMR}$  ( $\text{CDCl}_3$ , 376 MHz):  $-77.5$ ; **IR (neat)** 3312(*s*), 2964(*m*), 2878(*m*), 1430(*s*), 1367(*s*), 1228(*s*), 1187(*s*), 1144(*s*), 1073(*s*), 1035(*s*), 609(*s*)  $\text{cm}^{-1}$ ; **HRMS-ASAP** (negative):  $M = \text{C}_5\text{H}_{10}\text{F}_3\text{NO}_2\text{S}$ ; expected  $(M-H)^- m/z$  204.0306, observed  $(M-H)^- m/z$  204.0310.

### 1,1,1-trifluoro-*N*-pentylmethanesulfonamide (1c)

Prepared according to **Procedure A** from commercially available amylamine (871 mg, 10.0 mmol). Colorless oil (1.44 g, 66% yield).  $R_f = 0.37$  (9:1 hex:EtOAc).

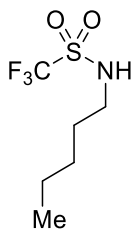

$^1\text{H NMR}$  ( $\text{CDCl}_3$ , 400 MHz)  $\delta$  4.67 (brs, 1H), 3.30 (t,  $J = 6.9$  Hz, 2H), 1.62 (tt,  $J = 7.4$ , 7.4 Hz, 2H), 1.38-1.32 (m, 4H), 0.92 (t,  $J = 7.0$  Hz, 3H);  $^{13}\text{C NMR}$  ( $\text{CDCl}_3$ , 100 MHz): 119.7 (q,  $J = 319$ ), 44.5, 29.7, 28.2, 22.0, 13.7;  $^{19}\text{F NMR}$  ( $\text{CDCl}_3$ , 376 MHz):  $-77.5$ ; **IR** (**neat**) 3311(*s*), 2960(*m*), 2935(*m*), 2868(*m*), 1430(*s*), 1367(*s*), 1229(*s*), 1188(*s*), 1144(*s*), 1063(*s*), 610(*s*)  $\text{cm}^{-1}$ ; **HRMS-ASAP** (negative):  $M = \text{C}_6\text{H}_{12}\text{F}_3\text{NO}_2\text{S}$ ; expected  $(M-H)^- m/z$  218.0463, observed  $(M-H)^- m/z$  218.0462.

#### ***N*-(cyclohexylmethyl)-1,1,1-trifluoromethanesulfonamide (1d)**

Prepared according to **Procedure A** from commercially available Cyclohexanemethylamine (226 mg, 2.00 mmol). Colorless oil (235 mg, 48% yield).  $R_f = 0.51$  (7:1 hex:EtOAc).

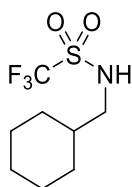

$^1\text{H NMR}$  ( $\text{CDCl}_3$ , 400 MHz)  $\delta$  5.15 (brs, 1H), 3.13 (d,  $J = 6.8$  Hz, 2H), 1.79-1.68 (m, 5H), 1.58-1.48 (m, 1H), 1.32-1.12 (m, 3H), 1.00-0.91 (m, 2H);  $^{13}\text{C NMR}$  ( $\text{CDCl}_3$ , 100 MHz): 119.7 (q,  $J = 319$ ), 50.4, 38.1, 30.1, 26.0, 25.5;  $^{19}\text{F NMR}$  ( $\text{CDCl}_3$ , 376 MHz):  $-77.3$ ; **IR** (**neat**) 3311(*s*), 2928(*s*), 2855(*m*), 1433(*s*), 1368(*s*), 1229(*s*), 1187(*s*), 1142(*s*), 1061(*s*), 1049(*s*), 609(*s*)  $\text{cm}^{-1}$ ; **HRMS-ASAP** (negative):  $M = \text{C}_8\text{H}_{14}\text{F}_3\text{NO}_2\text{S}$ ; expected  $(M-H)^+ m/z$  244.0619, observed  $(M-H)^+ m/z$  244.0628;

#### **1,1,1-trifluoro-*N*-isopropylmethanesulfonamide (1e)**

Prepared according to **Procedure A** from commercially available Isopropylamine (1.00 g, 16.9 mmol). Colorless oil (2.11 g, 65% yield).  $R_f = 0.42$  (7:1 hex:EtOAc).

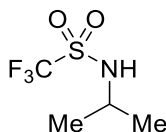

$^1\text{H NMR}$  ( $\text{CDCl}_3$ , 400 MHz)  $\delta$  5.18 (brs, 1H), 3.84-3.76 (m, 1H), 1.27 (d,  $J = 6.6$  Hz, 6H);  $^{13}\text{C NMR}$  ( $\text{CDCl}_3$ , 100 MHz): 119.6 (q,  $J = 319$ ), 48.6, 23.9;  $^{19}\text{F NMR}$  ( $\text{CDCl}_3$ , 376 MHz): -78.2; **IR (neat)** 3304(*s*), 2985(*m*), 1468(*m*), 1432(*s*), 1368(*s*), 1228(*s*), 1186(*s*), 1150(*s*), 1014(*s*), 901(*s*), 615(*s*)  $\text{cm}^{-1}$ ; **HRMS-ASAP** (negative):  $M = \text{C}_4\text{H}_8\text{F}_3\text{NO}_2\text{S}$ ; expected  $(M-H)^- m/z$  190.0150, observed  $(M-H)^- m/z$  190.0147.

### ***N*-cyclohexyl-1,1,1-trifluoromethanesulfonamide (1f)**

Prepared according to **Procedure A** from commercially available Cyclohexylamine (992 mg, 10.0 mmol). White solid (1.86 g, 81% yield).  $R_f = 0.55$  (9:1 hex:EtOAc).

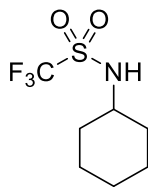

$^1\text{H NMR}$  ( $\text{CDCl}_3$ , 400 MHz)  $\delta$  5.11 (brs, 1H), 3.51-3.45 (m, 1H), 2.06-2.00 (m, 2H), 1.78-1.72 (m, 2H), 1.63-1.59 (m, 1H), 1.42-1.29 (m, 4H), 1.23-1.14 (m, 1H);  $^{13}\text{C NMR}$  ( $\text{CDCl}_3$ , 100 MHz): 119.6 (q,  $J = 319$ ), 54.9, 34.3, 24.8, 24.6;  $^{19}\text{F NMR}$  ( $\text{CDCl}_3$ , 376 MHz): -78.1; **IR (neat)** 3277(*s*), 2933(*s*), 2859(*m*), 1453(*s*), 1376(*s*), 1222(*s*), 1177(*s*), 1139(*s*), 1063(*s*), 1029(*s*), 892(*s*), 610(*s*)  $\text{cm}^{-1}$ ; **HRMS-ASAP** (negative):  $M = \text{C}_7\text{H}_{12}\text{F}_3\text{NO}_2\text{S}$ ; expected  $(M-H)^+ m/z$  230.0463, observed  $(M-H)^+ m/z$  230.0467;

### **1,1,1-trifluoro-*N*-methylmethanesulfonamide (1g)**

Prepared according to **Procedure A** from commercially methanamine hydrochloride (675 mg, 10 mmol). Colorless oil (183.8 mg, 11% yield).  $R_f = 0.65$  (6:1 hex:EtOAc).

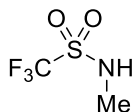

---

**<sup>1</sup>H NMR** (CDCl<sub>3</sub>, 400 MHz) δ 4.94 (brs, 1H), 2.98 (s, 3H); **<sup>13</sup>C NMR** (CDCl<sub>3</sub>, 100 MHz) δ 119.9 (q, *J* = 321 Hz), 30.23; **<sup>19</sup>F NMR** (CDCl<sub>3</sub>, 376 MHz): -76.9; **IR (neat)** 3643.05 (brs), 3326.57 (brs), 1419.70 (m), 1361.55 (s), 1230.15 (s), 1186.38 (s), 1151.52 (s), 1074.90 (s), 852.52 (s), 606.70 (s), 521.87 (m), 461.18 (m) cm<sup>-1</sup>; **MS (ESI, negative)**: M = C<sub>2</sub>H<sub>4</sub>F<sub>3</sub>NO<sub>2</sub>S; expected (M-H)<sup>-</sup> *m/z* 162.11, observed (M-H)<sup>-</sup> *m/z* 162.0.

### ethyl 3-((trifluoromethyl)sulfonamido)propanoate (1h)

Prepared according to **Procedure A** from commercially available β-Alanine Ethyl Ester Hydrochloride (479 mg, 3.12 mmol). Colorless oil (265 mg, 34% yield). R<sub>f</sub> = 0.50 (3:1 hex:EtOAc).

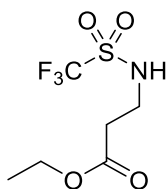

**<sup>1</sup>H NMR** (CDCl<sub>3</sub>, 400 MHz) δ 6.22 (brs, 1H), 4.19 (q, *J* = 7.1 Hz, 2H), 3.58-3.50 (m, 2H), 2.65 (t, *J* = 7.2 Hz, 2H), 1.28 (t, *J* = 7.2 Hz, 3H); **<sup>13</sup>C NMR** (CDCl<sub>3</sub>, 100 MHz) δ 172.0, 119.6 (q, *J* = 321 Hz), 61.4, 39.8, 34.6, 14.0; **<sup>19</sup>F NMR** (CDCl<sub>3</sub>, 376 MHz): -77.7; **IR (neat)** 3260(*s*), 2987(*s*), 1716(*s*), 1434(*s*), 1373(*s*), 1185(*s*), 1146(*s*), 1050(*m*), 950(*s*), 816(*m*), 607(*s*) cm<sup>-1</sup>; **HRMS-ASAP** (negative): M = C<sub>6</sub>H<sub>10</sub>F<sub>3</sub>NO<sub>4</sub>S; expected (M-H)<sup>-</sup> *m/z* 248.0204, observed (M-H)<sup>-</sup> *m/z* 248.0210.

### 1,1,1-trifluoro-N-(2-(pyridin-2-yl)ethyl)methanesulfonamide (1i)

Prepared according to **Procedure A** from commercially available 2-(2-Pyridyl)ethylamine (488 mg, 4.00 mmol). White solid (568 mg, 56% yield). R<sub>f</sub> = 0.45 (1:2 hex:EtOAc).

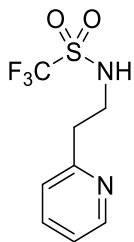



**<sup>1</sup>H NMR** (CDCl<sub>3</sub>, 400 MHz) δ 8.47 (d, *J* = 4.7 Hz, 1H), 8.30 (brs, 1H), 7.69 (td, *J* = 7.7, 1.8 Hz, 1H), 7.24-7.20 (m, 2H), 3.71 (t, *J* = 6.4 Hz, 2H), 3.11 (t, *J* = 6.4 Hz, 1H); **<sup>13</sup>C NMR** (CDCl<sub>3</sub>, 100 MHz): 158.1, 148.7, 137.4, 123.8, 122.3, 119.9 (q, *J* = 320), 43.4, 36.9; **<sup>19</sup>F NMR** (CDCl<sub>3</sub>, 376 MHz): -77.7; **IR (neat)** 3028(*s*), 2629(*s*), 1597(*m*), 1438(*s*), 1366(*s*), 1222(*s*), 1175(*s*), 1077(*s*), 1008(*s*), 932(*s*), 767(*s*), 597(*s*) cm<sup>-1</sup>; **HRMS-ASAP** (negative): M = C<sub>8</sub>H<sub>9</sub>F<sub>3</sub>N<sub>2</sub>O<sub>2</sub>S; expected (M-H)<sup>-</sup> *m/z* 253.0259, observed (M-H)<sup>-</sup> *m/z* 253.0262.

### 1,1,1-trifluoro-*N*-(2-(thiophen-2-yl)ethyl)methanesulfonamide (1j)

Prepared according to **Procedure A** from commercially available 2-Thiopheneethylamine (508 mg, 4.00 mmol). Colorless oil (598 mg, 58% yield). R<sub>f</sub> = 0.53 (6:1 hex:EtOAc).

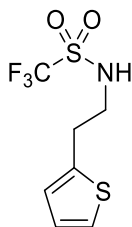

**<sup>1</sup>H NMR** (CDCl<sub>3</sub>, 400 MHz) δ 7.24 (dd, *J* = 5.1, 1.2 Hz, 1H), 7.01 (dd, *J* = 5.1, 3.4 Hz, 1H), 6.92 (dd, *J* = 3.4, 0.9 Hz, 1H), 5.18 (brs, 1H), 3.59 (t, *J* = 6.5 Hz, 2H), 3.15 (t, *J* = 6.7 Hz, 2H); **<sup>13</sup>C NMR** (CDCl<sub>3</sub>, 100 MHz): δ 138.8, 127.4, 126.3, 124.8, 119.6 (q, *J* = 321 Hz), 45.5, 30.8; **<sup>19</sup>F NMR** (CDCl<sub>3</sub>, 376 MHz): -77.4; **IR (neat)** 3308(*s*), 2919(*s*), 1426(*s*), 1368(*s*), 1229(*s*), 1188(*s*), 1143(*s*), 1070(*s*), 849(*s*), 702(*s*), 609(*s*) cm<sup>-1</sup>; **HRMS-ASAP** (negative): M = C<sub>7</sub>H<sub>8</sub>F<sub>3</sub>NO<sub>2</sub>S<sub>2</sub>; expected (M-H)<sup>+</sup> *m/z* 257.9870, observed (M-H)<sup>+</sup> *m/z* 257.9873;

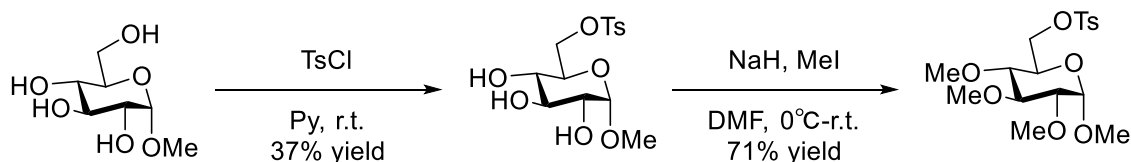

A solution of the Methyl α-D-Glucoside (2.38 g, 12.3 mmol) in dry pyridine (15.0 ml) was cooled to 0 °C in an ice bath with stirring. A solution of p-toluenesulfonyl chloride

(2.80 g, 14.7 mmol) was added at 0 °C. The mixture was slowly allowed to warm to rt and stir overnight. The solvent was removed *in vacuo*, then the reaction was quenched with water. The aqueous layer was extracted with EtOAc (20 mL×3), and the organic layer was combined, washed with brine, dried over anhydrous Na<sub>2</sub>SO<sub>4</sub>, and concentrated *in vacuo* to give crude ((2*R*,3*S*,4*S*,5*R*,6*S*)-3,4,5-trihydroxy-6-methoxytetrahydro-2*H*-pyran-2-yl)methyl 4-methylbenzenesulfonate, which was directly used for next step without further purification.

To a solution of ((2*R*,3*S*,4*S*,5*R*,6*S*)-3,4,5-trihydroxy-6-methoxytetrahydro-2*H*-pyran-2-yl)methyl 4-methylbenzenesulfonate (1.48 g, 4.26 mmol) and MeI (2.12 g, 14.91 mmol) in anhydrous DMF (15 mL) was added NaH (60% dispersion in mineral oil, 596 mg, 14.91 mmol) at 0 °C in four portions over 1 h. The resulting mixture was allowed to warm to ambient temperature over 12 h. Excess NaH was quenched by addition of EtOAc and the solvent was removed *in vacuo*. The residue was suspended in EtOAc, washed with H<sub>2</sub>O, dried over anhydrous Na<sub>2</sub>SO<sub>4</sub>, and concentrated *in vacuo*. The crude material was purified by flash column chromatography using hexane/EtOAc as the eluent to provide the desired product (1.16 g, 26%).

**((2*R*,3*R*,4*S*,5*R*,6*S*)-3,4,5,6-tetramethoxytetrahydro-2*H*-pyran-2-yl)methyl 4-methylbenzenesulfonate**

<sup>1</sup>H NMR (CDCl<sub>3</sub>, 400 MHz) δ 7.77 (d, *J* = 8.4 Hz, 2H), 7.31 (d, *J* = 8.4 Hz, 2H), 4.68 (d, *J* = 3.6 Hz, 1H), 4.23–4.15 (m, 2H), 3.61–3.56 (m, 1H), 3.55 (s, 3H), 3.43–3.36 (m, 4H), 3.42 (s, 3H), 3.30 (s, 3H), 3.08–2.99 (m, 2H), 2.41 (s, 3H) ppm; <sup>13</sup>C NMR (CDCl<sub>3</sub>, 100 MHz) δ 114.9, 133.1, 129.8, 128.0, 97.4, 83.4, 81.6, 78.9, 68.7, 68.5, 60.8, 60.5, 59.0, 55.3, 21.7 ppm; IR (neat) 2913(*s*), 2834(*s*), 1597(*s*), 1446(*s*), 1360(*s*), 1175(*s*), 1041(*s*), 901(*s*), 832(*s*), 745(*s*), 615(*s*) cm<sup>-1</sup>; HRMS-ESI (positive): M = C<sub>17</sub>H<sub>26</sub>O<sub>8</sub>S; expected (M+Na)<sup>+</sup> *m/z* 413.1246, observed (M+Na)<sup>+</sup> *m/z* 413.1248.

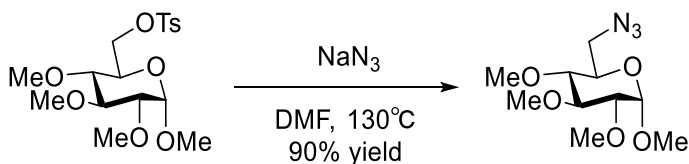

To a solution of NaN<sub>3</sub> (344.7 mg, 5.30 mmol) in DMF (1.0 mL) was added a solution of ((2*R*,3*R*,4*S*,5*R*,6*S*)-3,4,5,6-tetramethoxytetrahydro-2*H*-pyran-2-yl)methyl 4-methylbenzenesulfonate (1.03 g, 2.65 mmol) in dry DMF (6.0 mL). The mixture was stirred at 130 °C for 12h. After cooling down to room temperature, the reaction was quenched with water. Organic compounds were extracted with EtOAc (20 mL×3), and the combined organic layer was washed with brine, dried over anhydrous Na<sub>2</sub>SO<sub>4</sub>, and concentrated *in vacuo*. The crude material was purified by flash column chromatography using hexane/EtOAc as the eluent to provide (2*R*,3*R*,4*S*,5*R*,6*S*)-2-(azidomethyl)-3,4,5,6-tetramethoxytetrahydro-2*H*-pyran (618 mg, 90%).

**(2*R*,3*R*,4*S*,5*R*,6*S*)-2-(azidomethyl)-3,4,5,6-tetramethoxytetrahydro-2*H*-pyran**

<sup>1</sup>H NMR (CDCl<sub>3</sub>, 400 MHz) δ 4.79 (d, *J* = 3.5 Hz, 1H), 3.64–3.60 (m, 1H), 3.58 (s, 3H), 3.50 (s, 3H), 3.48 (s, 3H), 3.48–3.43 (m, 2H), 3.40 (s, 3H), 3.38–3.30 (m, 1H), 3.16 (dd, *J* = 9.6, 3.7 Hz, 1H), 3.03 (t, *J* = 9.2 Hz, 1H); <sup>13</sup>C NMR (CDCl<sub>3</sub>, 100 MHz) δ 97.4, 83.4, 81.8, 80.3, 70.0, 60.8, 60.6, 59.0, 55.3, 51.4; **IR** (neat) 2914(*s*), 2833(*s*), 2096(*s*), 1446(*s*), 1328(*s*), 1286(*s*), 1157(*s*), 1097(*s*), 991(*s*), 841(*m*), 554(*s*) cm<sup>-1</sup>; **HRMS-ESI** (positive): M = C<sub>10</sub>H<sub>19</sub>N<sub>3</sub>O<sub>5</sub>; expected (M+Na)<sup>+</sup> *m/z* 284.1223, observed (M+Na)<sup>+</sup> *m/z* 284.1224.

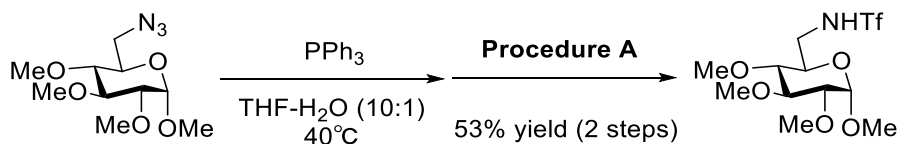

**1,1,1-trifluoro-*N*-(((2*R*,3*R*,4*S*,5*R*,6*S*)-3,4,5,6-tetramethoxytetrahydro-2*H*-pyran-2-yl)methyl)methanesulfonamide (1k)**

To a solution of PPh<sub>3</sub> (828.0 mg, 5.16 mmol) in THF/H<sub>2</sub>O (10/1) (22.0 mL) was added (2*R*,3*R*,4*S*,5*R*,6*S*)-2-(azidomethyl)-3,4,5,6-tetramethoxytetrahydro-2*H*-pyran (410.4 mg, 1.58 mmol). The mixture was stirred at 40 °C for 12 h. After cooled to room temperature, the solvent was removed *in vacuo*. Hexene (30 mL) was added and the mixture was sonicated until a slurry is formed. The slurry was filtered and the filtrate was concentrated *in vacuo* to give crude ((2*R*,3*R*,4*S*,5*R*,6*S*)-3,4,5,6-tetramethoxytetrahydro-

2*H*-pyran-2-yl)methanamine, which was directly used for next step without further purification.

Prepared according to **Procedure A** from crude ((2*R*,3*R*,4*S*,5*R*,6*S*)-3,4,5,6-tetramethoxytetrahydro-2*H*-pyran-2-yl)methanamine (387 mg, 1.58 mmol). White solid (305 mg, 53% yield).  $R_f = 0.44$  (1:1 hex:EtOAc)

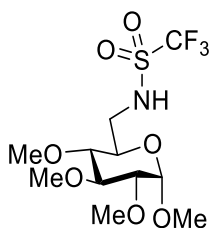

$^1\text{H NMR}$  ( $\text{CDCl}_3$ , 400 MHz)  $\delta$  5.49 (brs, 1H), 4.78 (d,  $J = 3.5$  Hz, 1H), 3.64-3.54 (m, 2H), 3.61 (s, 3H), 3.57 (s, 3H), 3.51-3.39 (m, 2H), 3.51 (s, 3H), 3.40 (s, 3H), 3.15 (dd,  $J = 9.6, 3.6$  Hz, 1H), 2.99 (t,  $J = 9.2$  Hz, 1H);  $^{13}\text{C NMR}$  ( $\text{CDCl}_3$ , 100 MHz):  $\delta$  119.6 (q,  $J = 321$  Hz), 97.6, 83.1, 81.7, 80.2, 68.8, 60.7, 60.5, 59.1, 55.4, 44.9;  $^{19}\text{F NMR}$  ( $\text{CDCl}_3$ , 376 MHz):  $-77.3$ ; **IR** (neat) 3161(*s*), 2925(*s*), 2838(*m*), 1446(*s*), 1374(*s*), 1230(*s*), 1185(*s*), 1149(*s*), 1094(*s*), 987(*s*), 881(*m*), 601(*s*)  $\text{cm}^{-1}$ ; **HRMS-ASAP** (negative):  $M = \text{C}_{11}\text{H}_{20}\text{F}_3\text{NO}_7\text{S}$ ; expected  $(M-H)^- m/z$  366.0834, observed  $(M-H)^- m/z$  366.0833;

### ***tert*-butyl (2-((trifluoromethyl)sulfamido)ethyl)carbamate (11)**

Prepared according to **Procedure A** from commercially available *N*-Boc-ethylenediamine (500 mg, 3.12 mmol). White solid (~ 1:3 mixture of rotamers, 360 mg, 40% yield).  $R_f = 0.39$  (3:1 hex:EtOAc).

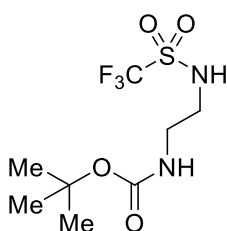

$^1\text{H NMR}$  ( $\text{CDCl}_3$ , 400 MHz)  $\delta$  6.98 (brs, 1H), 5.56 (brs, 0.25H), 5.10 (brs, 0.75H), 3.39-3.30 (m, 4H), 1.45 (s, 9H);  $^{13}\text{C NMR}$  ( $\text{CDCl}_3$ , 100 MHz)  $\delta$  157.3, 119.8 (q,  $J = 321$  Hz), 80.68, 45.1, 40.4, 28.2;  $^{19}\text{F NMR}$  ( $\text{CDCl}_3$ , 376 MHz):  $-77.5$ ; **IR** (neat) 3418(*s*), 3118(*s*),

2990(s), 2934(m), 1687(s), 1531(s), 1278(s), 1256(s), 1177(s), 1087(s), 1063(s), 990(s), 823(s), 583(s)  $\text{cm}^{-1}$ ; **HRMS-ASAP** (negative):  $M = \text{C}_8\text{H}_{15}\text{F}_3\text{N}_2\text{O}_4\text{S}$ ; expected  $(M-H)^- m/z$  291.0626, observed  $(M-H)^- m/z$  291.0630.

***tert*-butyl 4-(((trifluoromethyl)sulfonamido)methyl)piperidine-1-carboxylate (1m)**

Prepared according to **Procedure A** from commercially available 1-Boc-4-(aminomethyl)piperidine (857 mg, 4.0 mmol). White solid (702 mg, 51% yield).  $R_f = 0.47$  (3:1 hex:EtOAc).

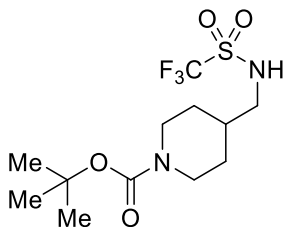

**$^1\text{H}$  NMR** ( $\text{CDCl}_3$ , 400 MHz)  $\delta$  6.50 (brs, 1H), 4.09(d,  $J = 12.0$  Hz, 2H), 3.14 (t,  $J = 5.9$  Hz, 2H), 2.67 (t,  $J = 11.2$  Hz, 2H), 1.73-1.64 (m, 3H), 1.42 (s, 9H), 1.17-1.06 (m, 2H);  **$^{13}\text{C}$  NMR** ( $\text{CDCl}_3$ , 100 MHz):  $\delta$  154.9, 119.8 (q,  $J = 321.4$  Hz), 78.0, 49.4, 43.4 (brs), 36.7, 29.2, 28.4;  **$^{19}\text{F}$  NMR** ( $\text{CDCl}_3$ , 376 MHz):  $\delta$  -77.3; **IR (neat)** 3130(s), 2977(m), 2931(m), 1658(s), 1431(s), 1367(s), 1226(s), 1178(s), 1057(s), 859(s), 602(s)  $\text{cm}^{-1}$ ; **HRMS-ASAP** (negative):  $M = \text{C}_{12}\text{H}_{21}\text{F}_3\text{N}_2\text{O}_4\text{S}$ ; expected  $(M-H)^- m/z$  345.1096, observed  $(M-H)^- m/z$  345.1099.

**methyl  $N^2$ -((*tert*-butoxycarbonyl)- $N^6$ -((trifluoromethyl)sulfonyl)-L-lysinate (1n)**

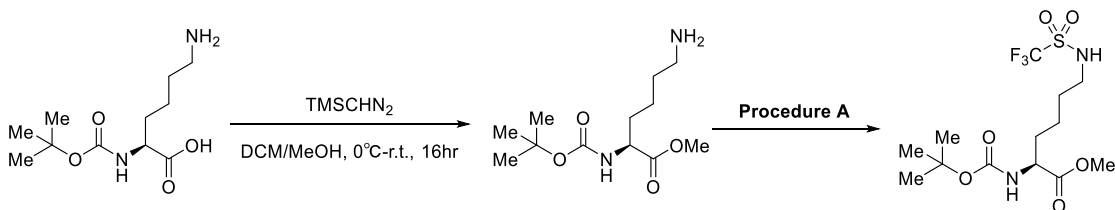

A solution of Boc-Lys-OH (246 mg, 1.00 mmol) in  $\text{CH}_2\text{Cl}_2$  (5 mL) and MeOH (1.3 mL) was charged with  $(\text{CH}_3)_3\text{SiCHN}_2$  (2.0 M solution in hexane, 1.0 mL, 2.00 mmol) at  $0^\circ\text{C}$  and the resulting mixture was stirred at the same temperature for 1 h and at room

temperature for another 1 h. The solvent was removed under reduced pressure to afford crude product as a yellow oil, which was directly used for the next step without further purification. **methyl *N*<sup>2</sup>-(*tert*-butoxycarbonyl)-*N*<sup>6</sup>-((trifluoromethyl)sulfonyl)-L-lysinate** was then synthesized according to **Procedure A**. White solid (227 mg, 59% yield for 2 steps).  $R_f = 0.38$  (4:1 hex:EtOAc). **<sup>1</sup>H NMR** (CDCl<sub>3</sub>, 400 MHz)  $\delta$  5.53 (brs, 1H), 5.18 (d, 1H), 4.31 (brs, 1H), 3.76 (s, 3H), 3.40-4.24 (m, 2H), 1.86-1.61 (m, 4H), 1.53-1.44 (m, 11H); **<sup>13</sup>C NMR** (CDCl<sub>3</sub>, 100 MHz)  $\delta$  173.14, 156.09, 119.8 (q,  $J = 321$  Hz), 80.70, 52.71, 52.65, 44.13, 32.92, 28.79, 28.45, 21.92; **<sup>19</sup>F NMR** (CDCl<sub>3</sub>, 376 MHz):  $-76.37$ ; **IR (neat)** 3191(*s*), 2947(*s*), 1687(*s*), 1511(*s*), 1440(*s*), 1367(*s*), 1227(*s*), 1179(*s*), 1077(*s*), 858(*m*), 605(*s*) cm<sup>-1</sup>; **HRMS-ASAP** (negative):  $M = C_{13}H_{23}F_3N_2O_6S$ ; expected  $(M-H)^- m/z$  391.1151, observed  $(M-H)^- m/z$  391.1151.

***N*-(2-(benzyloxy)ethyl)-1,1,1-trifluoromethanesulfonamide (1o)**

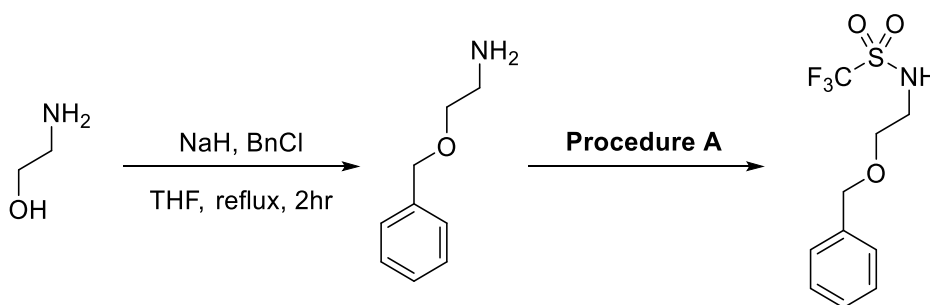

To a solution of Ethanolamine (1.00 g, 16.4 mmol) in THF (20 mL) was added NaH (60% dispersion in mineral oil, 654 mg, 16.4 mmol) at 0 °C. The temperature was then raised to reflux and the solution aged for 30 min, at which point, benzyl chloride (1.86 g, 14.7 mmol) was added dropwise. The solution was aged at reflux for 2 h, then cooled to 20 °C and quenched with water (10 mL). The mixture was extracted with EtOAc (10 mL×3), and the organic layer was combined, washed with brine, dried over anhydrous Na<sub>2</sub>SO<sub>4</sub>, and concentrated *in vacuo* to give crude *O*-Benzyloxyethanamine, which was directly used for the next step without further purification. ***N*-(2-(benzyloxy)ethyl)-1,1,1-trifluoromethanesulfonamide** was then synthesized according to **Procedure A**. Colorless oil (705 mg, 15% yield for 2 steps).  $R_f = 0.48$  (6:1 hex:EtOAc).

**<sup>1</sup>H NMR** (CDCl<sub>3</sub>, 400 MHz) δ 7.43-7.33 (m, 5H), 5.29 (brs, 1H), 4.57 (s, 2H), 3.63 (t, *J* = 4.6 Hz, 2H), 3.50 (q, *J* = 5.0 Hz, 2H); **<sup>13</sup>C NMR** (CDCl<sub>3</sub>, 100 MHz) δ 137.1, 128.6, 128.2, 128.0, 119.7 (q, *J* = 321 Hz), 73.4, 68.5, 44.0; **<sup>19</sup>F NMR** (CDCl<sub>3</sub>, 376 MHz): -77.5; **IR (neat)** 3312(*s*), 2872(*s*), 1496(*s*), 1371(*s*), 1229(*s*), 1188(*s*), 1147(*s*), 1080(*s*), 1024(*s*), 804(*s*), 607(*s*) cm<sup>-1</sup>; **HRMS-ASAP** (negative): *M* = C<sub>10</sub>H<sub>12</sub>F<sub>3</sub>NO<sub>3</sub>S; expected (M-H)<sup>-</sup> *m/z* 282.0412, observed (M-H)<sup>-</sup> *m/z* 282.0413.

### 1,1,1-trifluoro-*N*-(4-phenylbutyl)methanesulfonamide (1p)

Prepared according to **Procedure A** from commercially available 4-Phenylbutylamine (893 mg, 5.99 mmol). Colorless oil (768 mg, 46% yield). *R<sub>f</sub>* = 0.57 (7:1 hex:EtOAc).

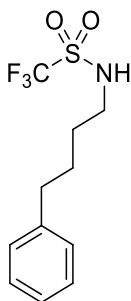

**<sup>1</sup>H NMR** (CDCl<sub>3</sub>, 400 MHz) δ 7.36-7.33 (m, 2H), 7.27-7.21 (m, 3H), 5.06 (brs, 1H), 3.33 (q, *J* = 6.6 Hz, 2H), 2.69 (t, *J* = 7.2 Hz, 2H), 1.77-1.61 (m, 4H); **<sup>13</sup>C NMR** (CDCl<sub>3</sub>, 100 MHz): 141.5, 128.5, 128.4, 126.1, 119.7 (q, *J* = 319), 44.3, 35.1, 29.6, 27.9; **<sup>19</sup>F NMR** (CDCl<sub>3</sub>, 376 MHz): -77.3; **IR (neat)** 3313(*s*), 3027(*m*), 2938(*m*), 2862(*s*), 1603(*m*), 1495(*s*), 1427(*s*), 1368(*s*), 1229(*s*), 1188(*s*), 1144(*s*), 1070(*s*), 747(*s*), 700(*s*), 610(*s*) cm<sup>-1</sup>; **HRMS-ASAP** (negative): *M* = C<sub>11</sub>H<sub>14</sub>F<sub>3</sub>NO<sub>2</sub>S; expected (M-H)<sup>-</sup> *m/z* 280.0619, observed (M-H)<sup>-</sup> *m/z* 280.0623.

### 1,1,1-trifluoro-*N*-(4-methylpentyl)methanesulfonamide (1q)

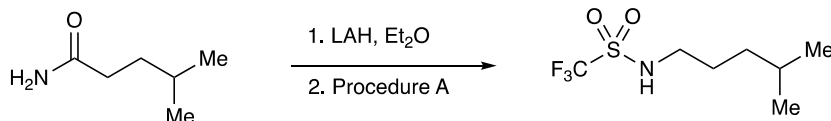

---

4-methylpentanamide was prepared according to literature procedure.<sup>1</sup> To a solution of amide (3.12g, 27.08 mmol) in Et<sub>2</sub>O at 0 °C was added LAH (3.5g, 94.78 mmol) in portions. The mixture was warmed to rt and stirred overnight. The reaction was cooled back down to 0 °C and water was added slowly (1mL per 1g LAH), followed by 15% NaOH (1 mL per 1g LAH), and then again water (3 mL per 1g LAH). The mixture was brought back up to rt, stirred for ~20 min, and then filtered. The solvent in the filtrate was then removed under reduced pressure to afford the crude product. This crude amine was carried forward without further purification and 1,1,1-trifluoro-*N*-(4-methylpentyl)methanesulfonamide was prepared according to **Procedure A**. Colorless oil (2.213 g, 35% yield). R<sub>f</sub> = 0.30 (9:1 hex:EtOAc).

<sup>1</sup>H NMR (CDCl<sub>3</sub>, 400 MHz) δ 4.97 (brs, 1H), 3.28 (t, *J* = 7.2 Hz, 2H), 1.64-1.52 (m, 3H), 1.25-1.19 (m, 2H), 0.90 (d, *J* = 6.6 Hz, 3H); <sup>13</sup>C NMR (CDCl<sub>3</sub>, 100 MHz): δ 119.83 (q, *J* = 319.0 Hz), 44.94, 35.42, 28.20, 27.71, 22.49; <sup>19</sup>F NMR (CDCl<sub>3</sub>, 376 MHz): δ -77.41;

### 1,1,1-trifluoro-*N*-octylmethanesulfonamide (1r)

Prepared according to **Procedure A** from commercially available octylamine (2g, 15.48mmol). Light yellow oil (2.10 g, 52% yield). R<sub>f</sub> = 0.85 (4:1 hex:EtOAc).

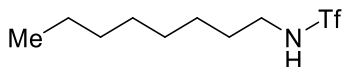

<sup>1</sup>H NMR (CDCl<sub>3</sub>, 400 MHz) δ 5.17 (brs, 1H), 3.27 (t, *J* = 7.21 Hz, 2H), 1.59 (p, *J* = 7.2 Hz, 2H), 1.39-1.16 (m, 10H), 0.87 (t, *J* = 6.51 Hz, 3H); <sup>13</sup>C NMR (CDCl<sub>3</sub>, 101 MHz) δ 119.85 (q, *J* = 321.1 Hz), 44.64, 31.82, 30.20, 29.17, 29.06, 26.30, 22.70, 14.08; <sup>19</sup>F NMR (CDCl<sub>3</sub>, 376 MHz) δ -77.6. IR (CDCl<sub>3</sub>) cm<sup>-1</sup>; IR (CDCl<sub>3</sub>) 3313.56 (brs), 2928.18 (m), 2857.71 (m), 1428.01 (m), 1369.64 (s), 1265.46 (m), 1230.16 (s), 1191.88 (s), 1145.76 (s), 1068.87 (m), 895.10 (m), 739.75 (s) cm<sup>-1</sup>; HRMS-ASAP (negative); M = C<sub>9</sub>H<sub>18</sub>F<sub>3</sub>NO<sub>2</sub>S; expected (M-H)<sup>-</sup> *m/z* 260.0932, observed (M-H)<sup>-</sup> *m/z* 260.0935.

---

<sup>1</sup> Chu, J. C. K.; Rovis, T. *Nature* **2016**, *539*, 272-275.



### 1,1,1-trifluoro-*N*-(3-phenylpropyl-1,1-*d*<sub>2</sub>-)methanesulfonamide (**1s-D<sub>2</sub>**)

3-phenylpropan-1,1-*d*<sub>2</sub>-1-amine was prepared according to a previously reported literature procedure.<sup>2</sup> **1s-D<sub>2</sub>** was prepared according to **Procedure A** (1.096g 3-phenylpropan-1,1-*d*<sub>2</sub>-1-amine, 7.99 mmol). Clear oil (835.5mg, 40%). R<sub>f</sub> = 0.70 (4:1 hex:EtOAc).

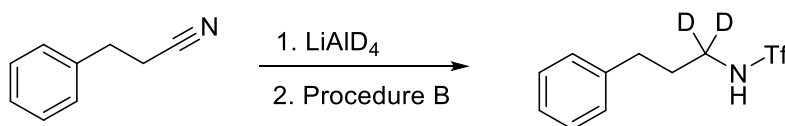

<sup>1</sup>H NMR (CDCl<sub>3</sub>, 400 MHz) δ 7.34-7.29 (m, 2H), 7.26-7.17 (m, 3H), 4.82 (brs, 1H), 2.72-2.68 (m, 2H), 1.96-1.92 (m, 2H); <sup>2</sup>H NMR (CHCl<sub>3</sub>, 400 MHz) δ 3.30 (s, 2H); <sup>13</sup>C NMR (CDCl<sub>3</sub>, 101 MHz) δ 140.33, 128.85, 128.44, 126.59, 119.79 (q, *J* = 322.2 Hz), 43.58 (pent, *J* = 21.2 Hz), 32.62, 31.64; <sup>19</sup>F NMR (CDCl<sub>3</sub>, 376 MHz) δ -77.3. IR (CDCl<sub>3</sub>) 3314.43 (brs), 2938.11 (brs), 1495.87 (m), 1416.24 (s), 1358.29 (s), 1231.76 (s), 1190.10 (s), 1148.79 (s), 1030.21 (s), 834.29 (m), 740.40 (s), 700.68 (s), 606.16 (s), 513.89 (m), 477.47 (m) cm<sup>-1</sup>; HRMS-ASAP (negative); M = C<sub>10</sub>H<sub>10</sub>D<sub>2</sub>F<sub>3</sub>NO<sub>2</sub>S expected (M-H)<sup>-</sup> *m/z* 268.0588, observed (M-H)<sup>-</sup> *m/z* 268.0584.

### 1,1,1-trifluoro-*N*-(3-phenylpropyl)methanesulfonamide (**3s-H<sub>2</sub>**)

Prepared according to **Procedure A** from commercially available 3-phenyl propylamine (1.0g, 7.4 mmol). Light yellow oil (777.7 mg, 39% yield). R<sub>f</sub> = 0.70 (4:1 hex:EtOAc).

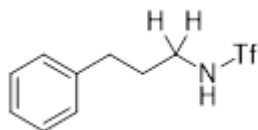

<sup>1</sup>H NMR (CDCl<sub>3</sub>, 400 MHz) δ 7.34-7.30 (m, 2H), 7.25-7.17 (m, 3H), 4.73 (brs, 1H), 3.33 (q, *J* = 6.7 Hz, 2H), 2.70 (t, *J* = 7.6 Hz, 2H), 1.96 (t, *J* = 7.2 Hz, 2H); <sup>13</sup>C NMR (CDCl<sub>3</sub>, 101 MHz) δ 140.29, 128.87, 128.44, 128.43, 126.62, 119.79 (q, *J* = 322.2 Hz), 44.17, 32.71, 31.89; <sup>19</sup>F NMR (CDCl<sub>3</sub>, 376 MHz) δ -77.27. IR (CDCl<sub>3</sub>) 3313.66 (brs), 2945.32 (brs), 1437.77 (m), 1368.27 (s), 1229.42 (s), 1189.35 (s), 1144.50 (s), 1070.92 (m),

<sup>2</sup> Chia, P.-Y.; Huang, S.-L.; Liu, Y.-H.; Lin, Y.-C.; *Chem. Asian. J.* **2016**, 11, 1098.

---

970.06 (m), 896.34 (m), 837.95 (m), 742.36 (s), 700.39 (s), 609.51 (s), 478.23 (m)  $\text{cm}^{-1}$ ; **HRMS-ASAP** (negative);  $M = \text{C}_{10}\text{H}_{12}\text{F}_3\text{NO}_2\text{S}$  expected  $(M-H)^- m/z$  266.0463, observed  $(M-H)^- m/z$  266.0460.

## Photoredox-Catalyzed $\alpha\text{-C}(sp^3)\text{-H}$ Alkylation (Alkene and Trifluoromethanesulfonamide Scope)

**Procedure B:** Trifluoromethanesulfonamide (0.10 mmol, 1.0 equiv.), alkene (1.2–5.0 equiv.), quinuclidine (2.0 equiv.), and  $[\text{Ir}\{\text{dF}(\text{CH}_3)\text{ppy}\}_2(\text{dtbbpy})]\text{PF}_6$  (2.0 mol %) were placed into an oven-dried vial (4 mL). After an addition of DMF (0.50 mL), the resulting mixture was illuminated with a blue LED (Kessil, 34W) for 16 h (the distance between the vial and the LED was about 2 cm and the temperature was  $\sim 40^\circ\text{C}$ ). After careful acidification with aq. HCl (0.5 M), organics were extracted with EtOAc (2 mL  $\times$  3) and concentrated *in vacuo*. The residue was directly subjected to flash silica gel column chromatography.

### *tert*-butyl 4-((trifluoromethyl)sulfonamido)hexanoate (**3aa**)

Prepared according to **Procedure B** (with 3.0 equiv. of *tert*-butyl acrylate). Colorless oil (24.5 mg, 77% yield).  $R_f = 0.50$  (4:1 hex:EtOAc).

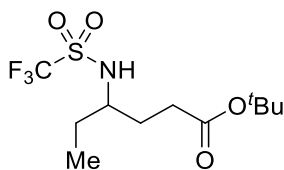

**$^1\text{H}$  NMR** ( $\text{CDCl}_3$ , 400 MHz)  $\delta$  5.60 (brs, 1H), 3.54–3.48 (m, 1H), 2.45–2.31 (m, 2H), 1.93–1.84 (m, 1H), 1.81–1.72 (m, 1H), 1.69–1.58 (m, 2H), 1.45 (s, 9H), 0.70 (t,  $J = 7.4$ , 3H);  **$^{13}\text{C}$  NMR** ( $\text{CDCl}_3$ , 100 MHz): 173.2, 119.7 (q,  $J = 319$ ), 57.4, 31.4, 29.0, 28.6, 28.0, 9.5;  **$^{19}\text{F}$  NMR** ( $\text{CDCl}_3$ , 376 MHz):  $-77.5$ ; **IR** (neat) 3208(s), 2976(m), 1699(s), 1456(s), 1369(s), 1227(s), 1185(s), 1150(s), 1013(s), 907(m), 775(m), 614(s)  $\text{cm}^{-1}$ ; **HRMS-ASAP** (negative):  $M = \text{C}_{11}\text{H}_{20}\text{F}_3\text{NO}_4\text{S}$ ; expected  $(M-H)^- m/z$  318.0987, observed  $(M-H)^- m/z$  318.0981.

---

**ethyl 4-((trifluoromethyl)sulfonamido)hexanoate (3ab)**

Prepared according to **Procedure B** (with 3.0 equiv. of ethyl acrylate). Colorless oil (18.4 mg, 63% yield).  $R_f = 0.34$  (4:1 hex:EtOAc).

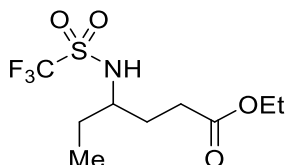

$^1\text{H NMR}$  ( $\text{CDCl}_3$ , 400 MHz)  $\delta$  5.19 (d,  $J = 8.0$  Hz, 1H), 4.16 (q,  $J = 7.1$  Hz, 2H), 3.58-3.49 (m, 1H), 2.52-2.40 (m, 2H), 1.99-1.91 (m, 1H), 1.86-1.77 (m, 1H), 1.71-1.59 (m, 2H), 1.27 (t,  $J = 7.6$  Hz, 3H), 0.98 (t,  $J = 7.4$  Hz, 3H);  $^{13}\text{C NMR}$  ( $\text{CDCl}_3$ , 100 MHz)  $\delta$  173.7, 119.6 (q,  $J = 321$  Hz), 61.1, 57.4, 30.3, 29.1, 28.7, 14.1, 9.6;  $^{19}\text{F NMR}$  ( $\text{CDCl}_3$ , 376 MHz)  $\delta$  -77.5; **IR (neat)** 3221(*s*), 2973(*m*), 2922(*s*), 1710(*s*), 1437(*s*), 1373(*s*), 1184(*s*), 1018(*s*), 906(*m*), 775(*m*), 615(*s*)  $\text{cm}^{-1}$ ; **HRMS-ASAP** (negative):  $M = \text{C}_9\text{H}_{16}\text{F}_3\text{NO}_4\text{S}$ ; expected  $(M-H)^- m/z$  290.0674, observed  $(M-H)^- m/z$  290.0678.

**methyl 4-((trifluoromethyl)sulfonamido)hexanoate (3ac)**

Prepared according to **Procedure B** (with 3.0 equiv. of methyl acrylate). Colorless oil (14.2 mg, 51% yield).  $R_f = 0.26$  (5:1 hex:EtOAc).

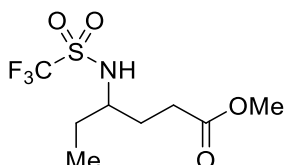

$^1\text{H NMR}$  ( $\text{CDCl}_3$ , 400 MHz)  $\delta$  5.17 (d,  $J = 8.1$  Hz, 1H), 3.71 (s, 3H), 3.57-3.48 (m, 1H), 2.55-2.41 (m, 2H), 1.99-1.91 (m, 1H), 1.86-1.77 (m, 1H), 1.69-1.60 (m, 2H), 0.98 (t,  $J = 7.5$  Hz, 3H);  $^{13}\text{C NMR}$  ( $\text{CDCl}_3$ , 100 MHz)  $\delta$  174.1, 119.6 (q,  $J = 321$  Hz), 57.4, 52.0, 30.0, 29.1, 28.7, 9.6;  $^{19}\text{F NMR}$  ( $\text{CDCl}_3$ , 376 MHz)  $\delta$  -77.5; **IR (neat)** 3227(*s*), 2923(*m*), 2852(*m*), 1716(*s*), 1438(*s*), 1372(*s*), 1184(*s*), 1013(*s*), 896(*m*), 775(*m*), 616(*s*)  $\text{cm}^{-1}$ ; **HRMS-ASAP** (negative):  $M = \text{C}_8\text{H}_{14}\text{F}_3\text{NO}_4\text{S}$ ; expected  $(M-H)^- m/z$  276.0517, observed  $(M-H)^- m/z$  276.0522.

---

**benzyl 4-((trifluoromethyl)sulfonamido)hexanoate (3ad)**

Prepared according to **Procedure B** (with 3.0 equiv. of Benzyl acrylate). Colorless oil (21.0 mg, 59% yield).  $R_f = 0.31$  (9:1 hex:EtOAc).

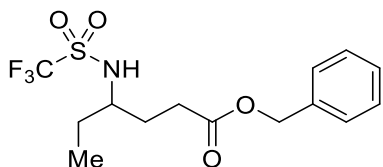

**$^1\text{H NMR}$**  ( $\text{CDCl}_3$ , 400 MHz)  $\delta$  7.42-7.34 (m, 5H), 5.32 (brs, 1H), 5.17 (d,  $J = 12.4$  Hz, 1H), 5.13 (d,  $J = 12.4$  Hz, 1H), 3.55 (brs, 1H), 2.60-2.48 (m, 2H), 2.03-1.95 (m, 1H), 1.89-1.80 (m, 1H), 0.99 (t,  $J = 7.5$  Hz, 3H);  **$^{13}\text{C NMR}$**  ( $\text{CDCl}_3$ , 100 MHz)  $\delta$  173.4, 135.5, 128.6, 128.4, 128.4, 119.6 (q,  $J = 321$  Hz), 66.9, 57.4, 30.3, 29.2, 28.7, 9.6;  **$^{19}\text{F NMR}$**  ( $\text{CDCl}_3$ , 376 MHz)  $\delta$  -77.5; **IR (neat)** 3234(s), 2938(m), 1712(s), 1455(s), 1372(s), 1227(s), 1184(s), 1011(s), 908(m), 750(s), 615(s)  $\text{cm}^{-1}$ ; **HRMS-ASAP** (negative):  $M = \text{C}_{14}\text{H}_{18}\text{F}_3\text{NO}_4\text{S}$ ; expected  $(M-H)^- m/z$  352.0830, observed  $(M-H)^- m/z$  352.0833.

**methyl 2-methyl-4-((trifluoromethyl)sulfonamido)hexanoate (3ae)**

Prepared according to **Procedure B** (with 3.0 equiv. of methyl methacrylate). Colorless oil (~1.7:1 mixed diastereomers, 19.9 mg, 68% yield).  $R_f = 0.42$  (7:1 hex:EtOAc).

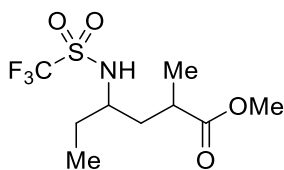

**$^1\text{H NMR}$**  ( $\text{CDCl}_3$ , 400 MHz)  $\delta$  5.17 (brs, 1H), 3.70 (s, 3H), 3.54 (brs, 1H), 2.70-2.54 (m, 1H), 2.06-1.94 (m, 1H), 1.73-1.51 (m, 3H), 1.22 (d,  $J = 7.1$  Hz, 3H), 0.98-0.94 (m, 3H);  **$^{13}\text{C NMR}$**  ( $\text{CDCl}_3$ , 100 MHz)  $\delta$  177.3, 176.7, 119.6 (q,  $J = 321$  Hz), 119.6 (q,  $J = 321$  Hz), 56.5, 56.1, 52.1, 52.0, 38.5, 37.9, 36.6, 35.6, 29.1, 28.4, 18.0, 17.8, 9.6, 9.4;  **$^{19}\text{F NMR}$**  ( $\text{CDCl}_3$ , 376 MHz)  $\delta$  -77.61, -77.64; **IR (neat)** 3225(s), 2974(m), 1712(s), 1455(s), 1372(s), 1227(s), 1185(s), 1148(s), 1019(s), 901(m), 774(m), 615(s)  $\text{cm}^{-1}$ ; **HRMS-ASAP**

(negative): M = C<sub>9</sub>H<sub>16</sub>F<sub>3</sub>NO<sub>4</sub>S; expected (M-H)<sup>-</sup> *m/z* 290.0674, observed (M-H)<sup>-</sup> *m/z* 290.0680.

**ethyl 3-methyl-4-((trifluoromethyl)sulfonamido)hexanoate (3af)**

Prepared according to **Procedure B** (with 5.0 equiv. of ethyl crotonate). Colorless oil (~2.3:1 mixed diastereomers, 9.7 mg, 32% yield). R<sub>f</sub> = 0.42 (4:1 hex:EtOAc).

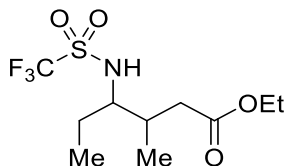

<sup>1</sup>H NMR (CDCl<sub>3</sub>, 400 MHz) δ 5.23 (d, *J* = 8.9 Hz, 0.64H), 5.43 (d, *J* = 9.6 Hz, 0.25H), 4.19-4.12 (m, 2H), 3.49-3.36 (m, 1H), 2.45 (dd, *J* = 15.9, 6.5 Hz, 2H), 2.36-2.31 (m, 2H), 1.72-1.49 (m, 2H), 1.27 (td, *J* = 7.21, 2.2 Hz, 3H), 1.05-0.96 (m, 6H); <sup>13</sup>C NMR (CDCl<sub>3</sub>, 100 MHz) δ 173.7, 173.1, 119.7 (q, *J* = 319 Hz), 119.6 (q, *J* = 319 Hz), 61.6, 61.4, 61.2, 60.9, 37.8, 37.3, 33.4, 32.7, 25.8, 25.1, 16.8, 15.7, 14.1, 14.1, 10.6, 9.4; <sup>19</sup>F NMR (CDCl<sub>3</sub>, 376 MHz) δ -77.3, -77.4; **IR (neat)** 3227(*s*), 2974(*m*), 1708(*s*), 1455(*s*), 1373(*s*), 1227(*s*), 1184(*s*), 1148(*s*), 1014(*s*), 918(*m*), 774(*m*), 617(*s*) cm<sup>-1</sup>; **HRMS-ASAP** (negative): M = C<sub>10</sub>H<sub>18</sub>F<sub>3</sub>NO<sub>4</sub>S; expected (M-H)<sup>-</sup> *m/z* 304.0830, observed (M-H)<sup>-</sup> *m/z* 304.0836.

**methyl 3-(2-methoxyacetyl)-4-((trifluoromethyl)sulfonamido)hexanoate (3ag)**

Prepared according to **Procedure B** (with 3.0 equiv. of dimethyl maleate). Colorless oil (~2.4:1 mixed diastereomers, 17.6 mg, 53% yield). R<sub>f</sub> = 0.26 (3:1 hex:EtOAc).

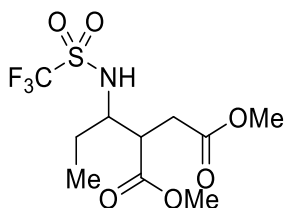

<sup>1</sup>H NMR (CDCl<sub>3</sub>, 400 MHz) δ 5.76 (brs, 2H), 3.75 (s, 3H), 3.72 (s, 3H), 3.71-3.62 (m, 1H), 2.85-2.65 (m, 1H), 2.49 (dd, *J* = 16.9, 5.8 Hz, 1H), 1.69-1.58 (m, 1H), 1.55-1.43 (m, 1H), 1.01 (td, *J* = 7.4, 4.0 Hz, 3H); <sup>13</sup>C NMR (CDCl<sub>3</sub>, 100 MHz) δ 173.6, 172.1, 171.8,

---

171.4, 119.5 (q,  $J = 320$  Hz), 119.5 (q,  $J = 319$  Hz), 58.0, 57.9, 52.6, 52.5, 52.3, 52.2, 45.4, 42.9, 33.7, 32.6, 27.9, 25.3, 10.5, 10.2;  $^{19}\text{F}$  NMR (CDCl<sub>3</sub>, 376 MHz)  $\delta$  -77.4, -77.6; **IR (neat)** 3234(*s*), 2957(*m*), 1718(*s*), 1438(*s*), 1375(*s*), 1227(*s*), 1186(*s*), 1148(*s*), 1013(*s*), 920(*m*), 779(*m*), 614(*s*) cm<sup>-1</sup>; **HRMS-ASAP** (negative):  $M = \text{C}_{10}\text{H}_{16}\text{F}_3\text{NO}_6\text{S}$ ; expected (M-H)<sup>-</sup>  $m/z$  334.0572, observed (M-H)<sup>-</sup>  $m/z$  334.0578.

### 1,1,1-trifluoro-*N*-(6-oxoheptan-3-yl)methanesulfonamide (3ah)

Prepared according to **Procedure B** (with 1.2 equiv. of 3-Buten-2-one). Colorless oil (17.9 mg, 69% yield).  $R_f = 0.18$  (5:1 hex:EtOAc).

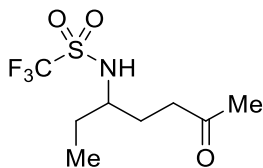

$^1\text{H}$  NMR (CDCl<sub>3</sub>, 400 MHz)  $\delta$  5.21 (brs, 1H), 3.51-3.44 (m, 1H), 2.75-2.57 (m, 2H), 2.21 (s, 3H), 1.95-1.87 (m, 1H), 1.80-1.71 (m, 1H), 1.69-1.61 (m, 2H), 1.00 (t,  $J = 7.5$  Hz, 3H);  $^{13}\text{C}$  NMR (CDCl<sub>3</sub>, 100 MHz)  $\delta$  208.8, 119.6 (q,  $J = 321$  Hz), 57.6, 39.5, 30.0, 29.1, 27.7, 9.6;  $^{19}\text{F}$  NMR (CDCl<sub>3</sub>, 376 MHz)  $\delta$  -77.4; **IR (neat)** 3196(*s*), 2972(*m*), 1705(*s*), 1456(*s*), 1369(*s*), 1227(*s*), 1185(*s*), 1149(*s*), 1015(*s*), 942(*m*), 774(*m*), 614(*s*) cm<sup>-1</sup>; **HRMS-ASAP** (negative):  $M = \text{C}_8\text{H}_{14}\text{F}_3\text{NO}_3\text{S}$ ; expected (M-H)<sup>-</sup>  $m/z$  260.0568, observed (M-H)<sup>-</sup>  $m/z$  250.0570.

### 1,1,1-trifluoro-*N*-(1-(3-oxocyclopentyl)propyl)methanesulfonamide (3ai)

Prepared according to **Procedure B** (with 3.0 equiv. of 2-cyclopenten-1-one). Colorless oil (~1:1 mixed diastereomers, 15.7 mg, 58% yield).  $R_f = 0.18$  (4:1 hex:EtOAc).

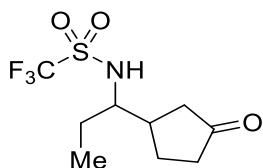

$^1\text{H}$  NMR (CDCl<sub>3</sub>, 400 MHz)  $\delta$  5.24 (brs, 1H), 3.55-3.48 (m, 1H), 2.44-2.32 (m, 3H), 2.28-1.94 (m, 3H), 1.94-1.52 (m, 3H), 1.02 (td,  $J = 7.5, 2.9$  Hz, 3H);  $^{13}\text{C}$  NMR (CDCl<sub>3</sub>,

100 MHz)  $\delta$  217.3, 217.2, 119.5 (q,  $J = 321$  Hz), 119.5 (q,  $J = 321$  Hz), 61.2, 61.0, 42.1, 41.6, 41.2, 41.1, 38.63, 38.4, 26.9, 26.4, 26.4, 26.0, 9.3, 9.2;  $^{19}\text{F}$  NMR (CDCl<sub>3</sub>, 376 MHz)  $\delta$  -77.17, -77.21; **IR (neat)** 3139(s), 2972(m), 1732(s), 1456(s), 1368(s), 1227(s), 1185(s), 1148(s), 1009(s), 906(m), 776(m), 602(s) cm<sup>-1</sup>; **HRMS-ASAP** (negative):  $M = \text{C}_9\text{H}_{14}\text{F}_3\text{NO}_3\text{S}$ ; expected (M-H)<sup>-</sup>  $m/z$  272.0568, observed (M-H)<sup>-</sup>  $m/z$  272.0569.

### 1,1,1-trifluoro-*N*-(1-(phenylsulfonyl)pentan-3-yl)methanesulfonamide (3aj)

Prepared according to **Procedure B** (with 3.0 equiv. of phenyl vinyl sulfone). White solid (26.3 mg, 73% yield).  $R_f = 0.26$  (2:1 hex:EtOAc).

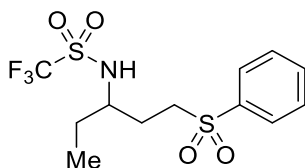

$^1\text{H}$  NMR (CDCl<sub>3</sub>, 400 MHz)  $\delta$  7.95-7.93 (m, 2H), 7.72 (t,  $J = 7.4$  Hz, 1H), 7.62 (t,  $J = 7.6$  Hz, 2H), 5.47 (s, 1H), 3.57-3.51 (m, 1H), 3.31-3.17 (m, 2H), 2.16-2.06 (m, 1H), 2.03-1.93 (m, 1H), 1.72-1.61 (m, 2H), 0.99 (t,  $J = 7.4$  Hz, 3H);  $^{13}\text{C}$  NMR (CDCl<sub>3</sub>, 100 MHz):  $\delta$  138.6, 134.1, 129.5, 128.0, 119.5 (q,  $J = 321$  Hz), 56.4, 52.7, 28.5, 27.7, 9.7;  $^{19}\text{F}$  NMR (CDCl<sub>3</sub>, 376 MHz): -77.4; **IR (neat)** 3212(s), 2973(m), 1447(s), 1372(s), 1304(s), 1187(s), 1143(s), 1085(s), 1013(m), 740(s), 615(s) cm<sup>-1</sup>; **HRMS-ASAP** (negative):  $M = \text{C}_{12}\text{H}_{16}\text{F}_3\text{NO}_4\text{S}_2$ ; expected (M-H)<sup>+</sup>  $m/z$  358.0395, observed (M-H)<sup>+</sup>  $m/z$  358.0402;

### diethyl (3-((trifluoromethyl)sulfonamido)pentyl)phosphonate (3ak)

Prepared according to **Procedure B** (with 3.0 equiv. of *tert*-butyl acrylate). Colorless oil (11.4 mg, 32%).  $R_f = 0.25$  (1:1 hex:EtOAc).

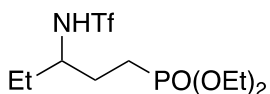

$^1\text{H}$  NMR (CDCl<sub>3</sub>, 500 MHz)  $\delta$  7.32 (d,  $J = 8.9$  Hz, 1H), 4.17-4.05 (m, 4H), 3.53-3.45 (m, 1H), 2.01-1.76 (m, 4H), 1.71-1.59 (m, 2H), 1.33 (td,  $J = 7.1, 2.3$  Hz, 6H), 0.97 (t,  $J = 7.4$  Hz, 3H);  $^{13}\text{C}$  NMR (CDCl<sub>3</sub>, 125 MHz)  $\delta$  119.92 (q,  $J = 320.0$  Hz), 62.32 (d,  $J = 6.7$  Hz), 57.34 (d,  $J = 13.4$  Hz), 27.97, 27.43 (d,  $J = 4.2$  Hz), 21.41 (d,  $J = 142.9$  Hz), 16.32 (d,  $J =$

5.9 Hz), 16.47 (d,  $J = 6.1$  Hz), 10.16;  $^{19}\text{F}$  NMR ( $\text{CDCl}_3$ , 376 MHz):  $\delta$  77.72; **IR** ( $\text{CDCl}_3$  solution) 3045 (*m*), 2980 (*m*), 2885 (*m*), 1723 (*w*), 1478 (*m*), 1370 (*s*), 1186 (*s*), 1027 (*s*), 969 (*s*), 789 (*m*), 613 (*s*), 511 (*m*)  $\text{cm}^{-1}$ ; **HRMS-ASAP** (negative):  $M = \text{C}_{10}\text{H}_{21}\text{F}_3\text{NO}_5\text{PS}$ ; expected ( $M\text{-H})^-$   $m/z$  354.0752, observed ( $M\text{-H})^-$   $m/z$  354.0753.

### ***N*-(1-cyanopentan-3-yl)-1,1,1-trifluoromethanesulfonamide (3al)**

Prepared according to **Procedure B** (with 3.0 equiv. of acrylonitrile). Colorless oil (12.9 mg, 53% yield).  $R_f = 0.38$  (2:1 hex:EtOAc).

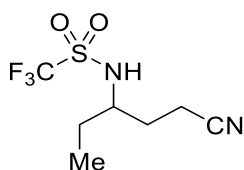

$^1\text{H}$  NMR ( $\text{CDCl}_3$ , 400 MHz)  $\delta$  4.14 (brs, 1H), 3.58-3.51 (m, 1H), 2.58-2.43 (m, 2H), 2.06-1.98 (m, 1H), 1.90-1.81 (m, 1H), 1.76-1.59 (m, 2H), 1.02 (t,  $J = 7.5$  Hz, 3H);  $^{13}\text{C}$  NMR ( $\text{CDCl}_3$ , 100 MHz)  $\delta$  119.5 (q,  $J = 321$  Hz), 119.0, 56.9, 30.8, 28.1, 13.9, 9.7;  $^{19}\text{F}$  NMR ( $\text{CDCl}_3$ , 376 MHz):  $-77.4$ ; **IR** (neat) 3189(*s*), 2975(*m*), 2942(*s*), 2253(*s*), 1437(*s*), 1370(*s*), 1227(*s*), 1186(*s*), 1147(*s*), 1013(*s*), 896(*s*), 774(*m*), 615(*s*), 576(*s*)  $\text{cm}^{-1}$ ; **HRMS-ASAP** (negative):  $M = \text{C}_7\text{H}_{11}\text{F}_3\text{N}_2\text{O}_2\text{S}$ ; expected ( $M\text{-H})^-$   $m/z$  243.0415, observed ( $M\text{-H})^-$   $m/z$  243.0419.

### ***N*-(5-cyanoheptan-3-yl)-1,1,1-trifluoromethanesulfonamide (3am)**

Prepared according to **Procedure B** (with 3.0 equiv. of methacrylonitrile) in 0.3 mmol scale.

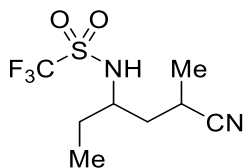

**Major isomer:** Colorless oil (34.9 mg, 45% yield).  $R_f = 0.32$  (4:1 hex:EtOAc).

$^1\text{H}$  NMR ( $\text{CDCl}_3$ , 400 MHz)  $\delta$  3.66-3.59 (m, 1H), 2.01-1.94 (m, 1H), 1.83-1.71 (m, 2H), 1.69-1.58 (m, 1H), 1.41 (d,  $J = 7.0$  Hz, 3H), 1.03 (t,  $J = 7.4$  Hz, 3H);  $^{13}\text{C}$  NMR ( $\text{CDCl}_3$ ,



100 MHz)  $\delta$  122.4, 119.5 (q,  $J = 321$  Hz), 55.5, 39.3, 28.2, 21.9, 17.8, 9.6;  **$^{19}\text{F}$  NMR** (CDCl<sub>3</sub>, 376 MHz):  $-77.4$ ; **IR (neat)** 3195(*s*), 2978(*m*), 2885(*m*), 2245(*s*), 1457(*s*), 1372(*s*), 1227(*s*), 1187(*s*), 1148(*s*), 1019(*s*), 844(*s*), 774(*m*), 615(*s*), 576(*s*) cm<sup>-1</sup>; **HRMS-ASAP** (negative):  $\text{M} = \text{C}_8\text{H}_{13}\text{F}_3\text{N}_2\text{O}_2\text{S}$ ; expected (M-H)<sup>-</sup>  $m/z$  257.0572, observed (M-H)<sup>-</sup>  $m/z$  257.0574.

**Minor isomer:** Colorless oil (13.2 mg, 17% yield).  $R_f = 0.27$  (4:1 hex:EtOAc).

**$^1\text{H}$  NMR** (CDCl<sub>3</sub>, 400 MHz)  $\delta$  5.12 (d,  $J = 8.4$  Hz, 1H), 3.63-3.54 (m, 1H), 2.80-2.71 (m, 1H), 1.86 (ddd,  $J = 14.6, 10.9, 3.8$  Hz, 1H), 1.70-1.53 (m, 3H), 1.31 (d,  $J = 7.1$  Hz, 3H), 0.95 (t,  $J = 7.5$  Hz, 3H);  **$^{13}\text{C}$  NMR** (CDCl<sub>3</sub>, 100 MHz)  $\delta$  122.1, 119.5 (q,  $J = 321$  Hz), 56.1, 40.1, 28.5, 22.5, 18.3, 9.6;  **$^{19}\text{F}$  NMR** (CDCl<sub>3</sub>, 376 MHz):  $-77.3$ ; **IR (neat)** 3165(*s*), 2984(*m*), 2888(*m*), 2250(*s*), 1459(*s*), 1370(*s*), 1229(*s*), 1186(*s*), 1152(*s*), 1027(*s*), 855 (*s*), 771(*m*), 609(*s*), 575(*s*) cm<sup>-1</sup>; **HRMS-ASAP** (negative):  $\text{M} = \text{C}_8\text{H}_{13}\text{F}_3\text{N}_2\text{O}_2\text{S}$ ; expected (M-H)<sup>-</sup>  $m/z$  257.0572, observed (M-H)<sup>-</sup>  $m/z$  257.0572.

### ***N,N*-dimethyl-4-((trifluoromethyl)sulfonamido)hexanamide (3an)**

Prepared according to **Procedure B** (with 3.0 equiv. of *N,N*-Dimethylacrylamide).

Colorless oil (10.9 mg, 38% yield).  $R_f = 0.34$  (EtOAc).

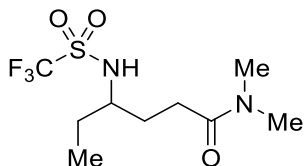

**$^1\text{H}$  NMR** (CDCl<sub>3</sub>, 400 MHz)  $\delta$  7.09 (d,  $J = 6.8$  Hz, 1H), 3.51-3.43 (m, 1H), 3.03 (s, 3H), 2.97 (s, 3H), 2.60-2.52 (m, 1H), 2.46-2.39 (m, 1H), 2.02-1.85 (m, 2H), 1.73-1.61 (m, 2H), 0.96 (t,  $J = 7.5$  Hz, 5H);  **$^{13}\text{C}$  NMR** (CDCl<sub>3</sub>, 100 MHz)  $\delta$  173.11, 119.85 (q,  $J = 321.5$  Hz), 57.61, 37.27, 35.83, 29.54, 29.08, 27.94, 9.55;  **$^{19}\text{F}$  NMR** (CDCl<sub>3</sub>, 376 MHz):  $-77.6$ ; **IR (neat)** 3071(*s*), 2970(*m*), 2938(*m*), 1619(*s*), 1461(*s*), 1367(*s*), 1225(*s*), 1180(*s*), 1151(*s*), 1014(*s*), 910(*m*), 777(*m*), 610(*s*) cm<sup>-1</sup>; **HRMS-ASAP** (negative):  $\text{M} = \text{C}_9\text{H}_{17}\text{F}_3\text{N}_2\text{O}_3\text{S}$ ; expected (M-H)<sup>-</sup>  $m/z$  289.0834, observed (M-H)<sup>-</sup>  $m/z$  289.0833.

### ***N*-(1,1-diphenylpentan-3-yl)-1,1,1-trifluoromethanesulfonamide (3ao)**

Prepared according to **Procedure B** (with 3.0 equiv. of *tert*-butyl acrylate). The reactions were conducted in triplicate (3 x 0.1mmol reaction vials), combined, and isolated via a Teledyne ISCO CombiFlash® Rf+ Lumen™ instrument using RediSep® Rf high performance silica. The yields are reported on a 0.1 mmol scale (average of 3 runs). White solid (13.6 mg, 37% yield).  $R_f = 0.45$  (9:1 hex:EtOAc).

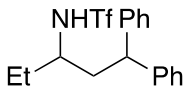

**$^1\text{H NMR}$**  ( $\text{CDCl}_3$ , 500 MHz)  $\delta$  7.32-7.29 (m, 4H), 7.27-7.24 (m, 2H), 7.21 (tq,  $J = 6.6$ , 1.5 Hz, 4H), 4.48 (d,  $J = 9.4$  Hz, 1H), 4.07 (t,  $J = 7.9$  Hz, 1H), 3.50-3.43 (m, 1H), 2.38-2.27 (m, 2H), 1.78-1.69 (m, 1H), 1.61-1.52 (m, 1H), 0.95 (t,  $J = 7.4$  Hz, 3H);  **$^{13}\text{C NMR}$**  ( $\text{CDCl}_3$ , 100 MHz)  $\delta$  143.51, 128.97, 128.95, 127.89, 127.70, 126.94, 126.87, 119.63 (q,  $J = 320.9$  Hz), 56.39, 47.59, 41.23, 28.00, 9.41;  **$^{19}\text{F NMR}$**  ( $\text{CDCl}_3$ , 376 MHz):  $\delta$  76.59; **IR (CDCl<sub>3</sub> solution)** 3302.69 (*br*), 3027.84 (*w*), 2928.41 (*m*), 1708.81 (*m*), 1599.03 (*m*), 1493.66 (*m*), 1427.79 (*m*), 1371.14 (*s*), 1226.75 (*s*), 1190.03 (*s*), 1145.94 (*s*), 1023.28 (*m*), 750.84 (*m*), 700.44 (*s*), 616.01 (*s*),  $\text{cm}^{-1}$ ; **HRMS-ASAP** (negative):  $M = \text{C}_{18}\text{H}_{20}\text{F}_3\text{NO}_2\text{S}$ ; expected  $(M-H)^- m/z$  370.1089, observed  $(M-H)^- m/z$  370.1093.

### 1,1,1-trifluoro-N-(1-(4-(trifluoromethyl)phenyl)pentan-3-yl)methanesulfonamide (3ap)

Prepared according to **Procedure B** (with 3.0 equiv. of *tert*-butyl acrylate). The reactions were conducted in triplicate (3 x 0.1mmol reaction vials), combined, and isolated via a Teledyne ISCO CombiFlash® Rf+ Lumen™ instrument using RediSep® Rf high performance silica. The yields are reported on a 0.1 mmol scale (average of 3 runs). White solid (11.9 mg, 33% yield).  $R_f = 0.4$  (9:1 hex:EtOAc).

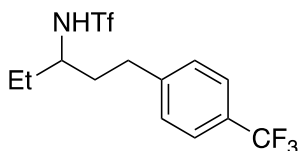

**$^1\text{H NMR}$**  ( $\text{CDCl}_3$ , 400 MHz)  $\delta$  7.56 (d,  $J = 8.0$  Hz, 2H), 7.30 (d,  $J = 8.0$  Hz, 1H), 4.59 (d,  $J = 9.2$  Hz, 1H), 3.61-3.52 (m, 1H), 2.84-2.69 (m, 2H), 1.98-1.88 (m, 1H), 1.88-1.80 (m, 1H), 1.79-1.68 (m, 1H), 1.66-1.57 (m, 1H), 1.00 (t,  $J = 7.4$  Hz, 3H);  **$^{13}\text{C NMR}$**  ( $\text{CDCl}_3$ ,

126 MHz)  $\delta$  144.93, 128.75, 128.76 (q,  $J = 34.0$  Hz), 125.71 (q,  $J = 3.7$  Hz), 124.36 (q,  $J = 271.9$  Hz), 119.70 (q,  $J = 320.7$  Hz), 57.80, 36.90, 31.82, 28.48, 9.76;  $^{19}\text{F}$  NMR (CDCl<sub>3</sub>, 376 MHz):  $\delta$  -62.44, -77.42; **IR (CDCl<sub>3</sub> solution)** 3288 (*br*), 2950 (*m*), 1616 (*m*), 1424 (*s*), 1374 (*s*), 1326 (*s*), 1226 (*s*), 1194 (*s*), 1126 (*s*), 1066 (*s*), 1018 (*s*), 840 (*m*), 820 (*m*), 618 (*s*), 516 (*m*) cm<sup>-1</sup>; **HRMS-ASAP** (negative):  $M = \text{C}_{13}\text{H}_{15}\text{F}_6\text{NO}_2\text{S}$ ; expected (M-H)<sup>-</sup>  $m/z$  362.0649, observed (M-H)<sup>-</sup>  $m/z$  362.0646.

### Methyl 4-(3-((trifluoromethyl)sulfonamide)pentyl)benzoate (3aq)

Prepared according to **Procedure B** (with 3.0 equiv. of *tert*-butyl acrylate). The reactions were conducted in triplicate (3 x 0.1 mmol reaction vials), combined, and isolated via a Teledyne ISCO CombiFlash® Rf+ Lumen™ instrument using RediSep® Rf high performance silica. The yields are reported on a 0.1 mmol scale (average of 3 runs). White solid (11.2 mg, 33% yield).  $R_f = 0.2$  (9:1hex:EtOAc).

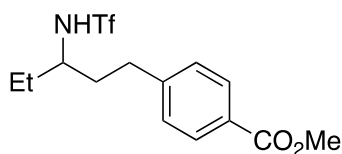

$^1\text{H}$  NMR (CDCl<sub>3</sub>, 400 MHz)  $\delta$  7.97 (d,  $J = 8.4$  Hz, 2H), 7.25 (d, 2H), 4.70 (d,  $J = 9.4$  Hz, 1H), 3.91 (s, 3H), 3.60-3.52 (m, 1H), 2.84-2.68 (m, 2H), 1.99-1.90 (m, 1H), 1.89-1.79 (m, 1H), 1.76-1.67 (m, 1H), 1.66-1.56 (m, 1H), 0.99 (t,  $J = 7.4$  Hz, 3H);  $^{13}\text{C}$  NMR (CDCl<sub>3</sub>, 100 MHz)  $\delta$  167.04, 146.21, 129.95, 128.30, 128.28, 119.58 (q,  $J = 320.8$  Hz), 57.66, 52.07, 36.56, 31.86, 28.29, 9.59;  $^{19}\text{F}$  NMR (CDCl<sub>3</sub>, 376 MHz):  $\delta$  -77.46; **IR (CDCl<sub>3</sub> solution)** 3208 (*br*), 2954 (*m*), 1700 (*s*), 1612 (*s*), 1434 (*s*), 1374 (*s*), 1284 (*s*), 1228 (*s*), 1186 (*s*), 1148 (*s*), 1116 (*s*) 1016 (*s*), 768 (*s*), 708 (*s*), 616 (*s*), 574 (*s*) cm<sup>-1</sup>; **HRMS-ASAP** (negative):  $M = \text{C}_{14}\text{H}_{18}\text{F}_3\text{NO}_4\text{S}$ ; expected (M-H)<sup>-</sup>  $m/z$  352.0830, observed (M-H)<sup>-</sup>  $m/z$  352.0829.

### 1,1,1-trifluoro-*N*-(1-(pyridine-3-yl)pentan-3-yl)methanesulfonamide (3ar)

Prepared according to **Procedure B** (with 3.0 equiv of 3-vinylpyridine). After acidifying with 0.5M HCl and extraction by EtOAc, the aqueous layer was basified to a pH > 7 with sat. NaHCO<sub>3</sub> and extracted by EtOAc. The combined organic layers were then washed

with brine. The reactions were conducted in triplicate (3 x 0.1 mmol reaction vials), combined, and isolated via a Teledyne ISCO CombiFlash® Rf+ Lumen™ instrument using RediSep® Rf high performance silica. The yields are reported on a 0.1 mmol scale (average of 3 runs). Colorless oil (9.7 mg, 33% yield).  $R_f = 0.3$  (7:3 hex:EtOAc).

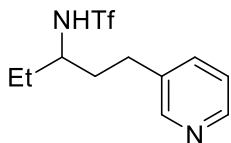

$^1\text{H NMR}$  ( $\text{CDCl}_3$ , 400 MHz)  $\delta$  9.53 (brs, 1H), 8.49 (d,  $J = 5.0$  Hz, 1H), 7.66 (td,  $J = 7.7$ , 1.8 Hz, 1H), 7.26-7.17 (m, 2H), 3.60 (quint, 1H), 3.11-3.04 (m, 1H), 2.99-2.92 (m, 1H), 2.12-1.98 (m, 2H), 1.82-1.62 (m, 2H), 0.97 (t,  $J = 7.5$  Hz, 3H);  $^{13}\text{C NMR}$  ( $\text{CDCl}_3$ , 100 MHz)  $\delta$  160.50, 148.24, 137.64, 123.82, 121.87, 120.16 (q,  $J = 322.0$  Hz), 57.17, 32.87, 31.58, 28.75, 9.96;  $^{19}\text{F NMR}$  ( $\text{CDCl}_3$ , 376 MHz)  $\delta$  -77.5. **IR** ( $\text{CDCl}_3$ ) 2936.12 (brs), 2636.72 (brs), 1598.28 (m), 1482.14 (m), 1440.91 (m), 1365.93 (s), 1223.12 (s), 1180.60 (s), 1151.19 (s), 1120.09 (s), 1052.80 (s), 1024.38 (s), 768.96 (m), 605.13 (s), 404.06 (m)  $\text{cm}^{-1}$ ; **HRMS-ASAP** (negative);  $M = \text{C}_{11}\text{H}_{15}\text{F}_3\text{N}_2\text{O}_2\text{S}$ ; expected  $(M-H)^- m/z$  295.0728, observed  $(M-H)^- m/z$  295.0731.

#### ***tert*-butyl 4-((trifluoromethyl)sulfonamido)heptanoate (3ba)**

Prepared according to **Procedure B** (with 3.0 equiv. of *tert*-butyl acrylate). Colorless oil (25.1 mg, 75% yield).  $R_f = 0.39$  (6:1 hex:EtOAc).

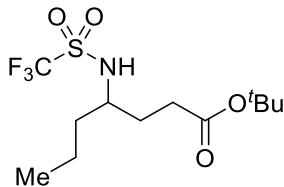

$^1\text{H NMR}$  ( $\text{CDCl}_3$ , 400 MHz)  $\delta$  5.52 (brs, 1H), 3.59 (brs, 1H), 2.48-2.33 (m, 2H), 1.97-1.88 (m, 1H), 1.82-1.73 (m, 1H), 1.63-1.56 (m, 2H), 1.47 (s, 9H), 1.46-1.38 (m, 2H), 0.97 (t,  $J = 7.3$ , 3H);  $^{13}\text{C NMR}$  ( $\text{CDCl}_3$ , 100 MHz): 173.1, 119.6 (q,  $J = 319$ ), 81.4, 56.0, 38.0, 31.4, 29.4, 28.0, 18.5, 13.6;  $^{19}\text{F NMR}$  ( $\text{CDCl}_3$ , 376 MHz): -77.4; **IR** (neat) 3205(s), 2967(m), 1700(s), 1448(s), 1369(s), 1227(s), 1185(s), 1150(s), 1034(m), 994(m), 754(m), 614(s)  $\text{cm}^{-1}$ ; **HRMS-ASAP** (negative):  $M = \text{C}_{12}\text{H}_{22}\text{F}_3\text{NO}_4\text{S}$ ; expected  $(M-H)^- m/z$  332.1143, observed  $(M-H)^- m/z$  332.1143.

***tert*-butyl 4-((trifluoromethyl)sulfonamido)octanoate (3ca)**

Prepared according to **Procedure B** (with 3.0 equiv. of *tert*-butyl acrylate). Colorless oil (24.4 mg, 70% yield).  $R_f = 0.45$  (8:1 hex:EtOAc).

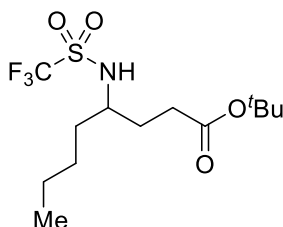

**$^1\text{H}$  NMR** ( $\text{CDCl}_3$ , 400 MHz)  $\delta$  5.52 (brs, 1H), 3.56 (brs, 1H), 2.45-2.31 (m, 2H), 1.94-1.86 (m, 1H), 1.80-1.71 (m, 1H), 1.61-1.56 (m, 2H), 1.45 (s, 9H), 1.38-1.29 (m, 4H), 0.91 (t,  $J = 6.9$ , 3H);  **$^{13}\text{C}$  NMR** ( $\text{CDCl}_3$ , 100 MHz): 173.2, 119.6 (q,  $J = 319$ ), 81.4, 56.1, 35.5, 31.4, 29.4, 28.0, 27.3, 22.4, 13.8;  **$^{19}\text{F}$  NMR** ( $\text{CDCl}_3$ , 376 MHz):  $-77.5$ ; **IR (neat)** 3194(s), 2934(m), 2869(m), 1729(s), 1701(s), 1457(s), 1370(s), 1227(s), 1150(s), 1055(m), 994(m), 843(m), 615(s)  $\text{cm}^{-1}$ ; **HRMS-ASAP** (negative):  $M = \text{C}_{13}\text{H}_{24}\text{F}_3\text{NO}_4\text{S}$ ; expected  $(M-H)^- m/z$  346.1300, observed  $(M-H)^- m/z$  346.1302;

***tert*-butyl 4-cyclohexyl-4-((trifluoromethyl)sulfonamido)butanoate (3da)**

Prepared according to **Procedure B** (with 3.0 equiv. of *tert*-butyl acrylate). White solid (24.0 mg, 64% yield).  $R_f = 0.53$  (7:1 hex:EtOAc).

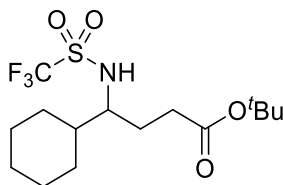

**$^1\text{H}$  NMR** ( $\text{CDCl}_3$ , 400 MHz)  $\delta$  5.41 (brs, 1H), 3.42 (brs, 1H), 2.46-2.32 (m, 2H), 1.94-1.70 (m, 7H), 1.70-1.60 (m, 1H), 1.47 (s, 9H), 1.32-0.99 (m, 5H);  **$^{13}\text{C}$  NMR** ( $\text{CDCl}_3$ , 100 MHz)  $\delta$  173.1, 119.6 (q,  $J = 321$  Hz), 81.4, 60.8, 42.3, 31.5, 28.7, 28.2, 28.0, 26.2, 26.2, 26.2, 26.1;  **$^{19}\text{F}$  NMR** ( $\text{CDCl}_3$ , 376 MHz):  $-77.2$ ; **IR (neat)** 3216(s), 2929(s), 2855(m), 1728(s), 1700(s), 1448(s), 1368(s), 1227(s), 1185(s), 1148(s), 1049(m), 988(m), 843(m),

---

604(s)  $\text{cm}^{-1}$ ; **HRMS-ASAP** (negative):  $M = \text{C}_{15}\text{H}_{26}\text{F}_3\text{NO}_4\text{S}$ ; expected  $(M-H)^- m/z$  372.1456, observed  $(M-H)^- m/z$  372.1456;

***tert*-butyl 4-methyl-4-((trifluoromethyl)sulfonamido)pentanoate (3ea)**

Prepared according to **Procedure B** (with 3.0 equiv. of *tert*-butyl acrylate). White solid (14.0 mg, 44% yield).  $R_f = 0.44$  (7:1 hex:EtOAc).

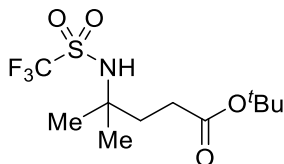

**$^1\text{H}$  NMR** ( $\text{CDCl}_3$ , 400 MHz)  $\delta$  6.10 (brs, 1H), 2.45 (t,  $J = 6.9$  Hz, 2H), 1.90 (t,  $J = 6.8$  Hz, 2H), 1.48 (s, 9H), 1.45 (s, 6H);  **$^{13}\text{C}$  NMR** ( $\text{CDCl}_3$ , 100 MHz):  $\delta$  173.9, 119.3 (q,  $J = 321$  Hz), 81.9, 59.4, 37.8, 30.1, 28.0, 27.7;  **$^{19}\text{F}$  NMR** ( $\text{CDCl}_3$ , 376 MHz):  $-77.8$ ; **IR** (*neat*) 3210(s), 2980(m), 2925(m), 1700(s), 1440(s), 1367(s), 1227(s), 1187(s), 1146(s), 1003(s), 843(m), 625(s)  $\text{cm}^{-1}$ ; **HRMS-ASAP** (negative):  $M = \text{C}_{11}\text{H}_{20}\text{F}_3\text{NO}_4\text{S}$ ; expected  $(M-H)^- m/z$  318.0987, observed  $(M-H)^- m/z$  318.0993;

***tert*-butyl 3-(1-((trifluoromethyl)sulfonamido)cyclohexyl)propanoate (3fa)**

Prepared according to **Procedure B** (with 3.0 equiv. of *tert*-Butyl acrylate). White solid (15.7 mg, 44% yield).  $R_f = 0.42$  (7:1 hex:EtOAc).

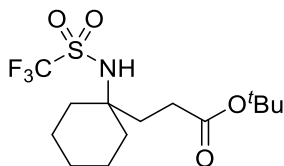

**$^1\text{H}$  NMR** ( $\text{CDCl}_3$ , 400 MHz)  $\delta$  5.34 (brs, 1H), 2.37 (t,  $J = 7.3$  Hz, 2H), 2.06 (t,  $J = 7.3$  Hz, 2H), 1.99-1.93 (m, 2H), 1.71-1.59 (m, 4H), 1.54-1.42 (m, 4H), 1.48 (s, 9H);  **$^{13}\text{C}$  NMR** ( $\text{CDCl}_3$ , 100 MHz): 173.2, 119.2 (q,  $J = 319$  Hz), 81.3, 62.9, 35.6, 32.0, 29.4, 28.0, 24.9, 22.1;  **$^{19}\text{F}$  NMR** ( $\text{CDCl}_3$ , 376 MHz):  $-77.8$ ; **IR** (*neat*) 3243(s), 2935(m), 2867(m), 1701(s), 1453(s), 1368(s), 1223(s), 1187(s), 1144(s), 993(s), 844(m), 626(s)  $\text{cm}^{-1}$ ;

---

**HRMS-ASAP** (negative):  $M = C_{14}H_{24}F_3NO_4S$ ; expected  $(M-H)^- m/z$  358.1300, observed  $(M-H)^- m/z$  358.1300;

**di-*tert*-butyl 4-((Trifluoromethyl)sulfonamide)heptanedioate (3ga)**

Prepared according to **Procedure B** (with 3.0 equiv. of *tert*-butyl acrylate). Clear oil (14.3 mg, 34% yield).  $R_f = 0.50$  (4:1 hex:EtOAc).

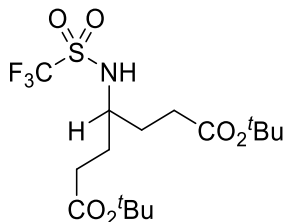

**$^1H$  NMR** ( $CDCl_3$ , 400 MHz)  $\delta$  6.15 (brs, 1H), 3.63 (brs, 1H), 2.45-2.33 (m, 4H), 1.89-1.82 (m, 4H), 1.45 (s, 18H);  **$^{13}C$  NMR** ( $CDCl_3$ , 100 MHz)  $\delta$  173.06, 119.87 (q,  $J = 321.4$  Hz), 81.55, 55.41, 31.36, 30.00, 28.16;  **$^{19}F$  NMR** ( $CDCl_3$ , 376 MHz)  $\delta$  77.25; **IR** ( $CDCl_3$ ) 3208.66 (brs), 2919.32 (m), 2850.26 (m), 1722.07 (m), 1458.12 (m), 1369.93 (s), 1229.05 (s), 1149.75 (s), 1081.43 (m) 908.68 (s), 844.08 (m), 733.95 (s), 648.83 (m), 615.65 (m)  $cm^{-1}$ ; **MS (ESI, negative)**:  $M = C_{16}H_{28}F_3NO_6S$ ; expected  $(M-H)^- m/z$  418.16, observed  $(M-H)^- m/z$  418.2.

**diethyl 3-((trifluoromethyl)sulfonamido)hexanedioate (3hb)**

Prepared according to **Procedure B** (with 1.5 equiv. of ethyl acrylate). Colorless oil (12.4 mg, 36% yield).  $R_f = 0.36$  (3:1 hex:EtOAc).

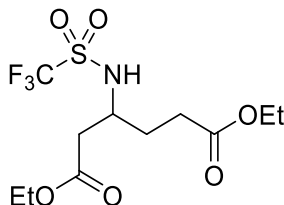

**$^1H$  NMR** ( $CDCl_3$ , 400 MHz)  $\delta$  6.32 (d,  $J = 9.3$  Hz, 1H), 4.17 (dq,  $J = 14.5, 7.1$  Hz, 4H), 3.85 (tq,  $J = 9.4, 4.6$  Hz, 1H), 2.77-2.59 (m, 2H), 2.47 (t,  $J = 7.1$  Hz, 2H), 2.06-1.88 (m, 2H), 1.30-1.25 (m, 6H);  **$^{13}C$  NMR** ( $CDCl_3$ , 100 MHz)  $\delta$  172.9, 171.2, 119.6 (q,  $J = 321$  Hz), 61.4, 61.0, 52.1, 38.8, 30.5, 29.7, 29.2, 14.1, 14.0;  **$^{19}F$  NMR** ( $CDCl_3$ , 376 MHz):

-77.8; **IR (neat)** 3219(*s*), 2920(*m*), 2850(*m*), 1732(*s*), 1711(*s*), 1438(*s*), 1376(*s*), 1228(*s*), 1147(*s*), 1022(*m*), 857(*m*), 614(*s*)  $\text{cm}^{-1}$ ; **HRMS-ASAP** (negative):  $M = \text{C}_{11}\text{H}_{18}\text{F}_3\text{NO}_6\text{S}$ ; expected  $(M-H)^- m/z$  348.0729, observed  $(M-H)^- m/z$  348.0734.

***tert*-butyl 5-(pyridin-2-yl)-4-((trifluoromethyl)sulfonamido)pentanoate (3ia)**

Prepared according to **Procedure B** (with 3.0 equiv. of *tert*-butyl acrylate). White solid (21.0 mg, 55% yield).  $R_f = 0.63$  (1:2 hex:EtOAc).

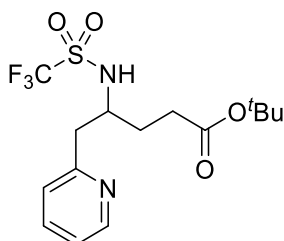

**$^1\text{H}$  NMR** ( $\text{CDCl}_3$ , 400 MHz)  $\delta$  8.49 (d,  $J = 4.2$  Hz, 1H), 7.66 (td,  $J = 7.7, 1.8$  Hz, 1H), 7.21 (dd,  $J = 7.5, 5.0$  Hz, 1H), 7.15 (d,  $J = 7.8$  Hz, 1H), 4.00-3.95 (m, 1H), 3.27 (dd,  $J = 15.4, 4.4$  Hz, 1H), 2.94 (dd,  $J = 15.4, 4.2$  Hz, 1H), 2.43-2.30 (m, 2H), 1.77-1.71 (m, 2H), 1.43 (s, 9H);  **$^{13}\text{C}$  NMR** ( $\text{CDCl}_3$ , 100 MHz)  $\delta$  172.3, 157.8, 148.8, 137.3, 124.6, 122.2, 119.9 (q,  $J = 320$  Hz), 80.8, 54.8, 40.0, 31.7, 29.8, 28.0;  **$^{19}\text{F}$  NMR** ( $\text{CDCl}_3$ , 376 MHz): -77.7; **IR (neat)** 3348(*s*), 1719(*s*), 1364(*s*), 1370(*s*), 1223(*s*), 1188(*s*), 1150(*s*), 996(*s*), 769(*m*), 603(*s*)  $\text{cm}^{-1}$ ; **HRMS-ASAP** (negative):  $M = \text{C}_{15}\text{H}_{21}\text{F}_3\text{N}_2\text{O}_4\text{S}$ ; expected  $(M-H)^- m/z$  381.1096, observed  $(M-H)^- m/z$  381.1103.

***tert*-butyl 5-(thiophen-2-yl)-4-((trifluoromethyl)sulfonamido)pentanoate (3ja)**

Prepared according to **Procedure B** (with 3.0 equiv. of *tert*-butyl acrylate). White solid (22.7 mg, 59% yield).  $R_f = 0.44$  (6:1 hex:EtOAc).

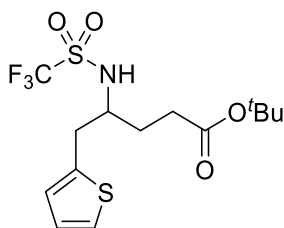



---

**<sup>1</sup>H NMR** (CDCl<sub>3</sub>, 400 MHz) δ 7.22 (dd, *J* = 5.2, 1.1 Hz, 1H), 6.99 (dd, *J* = 5.2, 3.4 Hz, 1H), 6.89 – 6.87 (m, 1H), 5.57 (d, *J* = 6.8 Hz, 1H), 3.86-3.78 (m, 1H), 3.22-3.13 (m, 2H), 2.49-2.30 (m, 2H), 1.92-1.72 (m, 2H), 1.45 (s, 9H); **<sup>13</sup>C NMR** (CDCl<sub>3</sub>, 100 MHz) δ 173.0, 136.9, 127.3, 125.0, 119.6 (q, *J* = 321 Hz), 81.6, 56.3, 36.2, 31.5, 28.4, 28.0; **<sup>19</sup>F NMR** (CDCl<sub>3</sub>, 376 MHz): -77.4; **IR (neat)** 3194(*s*), 2979(*m*), 2929(*m*), 1698(*s*), 1434(*s*), 1370(*s*), 1227(*s*), 1187(*s*), 1148(*s*), 1073(*m*), 994(*m*), 844(*m*), 700(*s*), 614(*s*) cm<sup>-1</sup>; **HRMS-ASAP** (negative): *M* = C<sub>14</sub>H<sub>20</sub>F<sub>3</sub>NO<sub>4</sub>S<sub>2</sub>; expected (*M*-H)<sup>-</sup> *m/z* 386.0708, observed (*M*-H)<sup>-</sup> *m/z* 386.0710.

**ethyl-4-((2*R*,3*R*,4*S*,5*R*,6*S*)-3,4,5,6-tetramethoxytetrahydro-2*H*-pyran-2-yl)-4-((trifluoromethyl)sulfonamido)butanoate (3kb)**

Prepared according to **Procedure B** (with 3.0 equiv. of *tert*-butyl acrylate). White solid (~1:1 mixed diastereomers, 31.7 mg, 68% yield). *R<sub>f</sub>* = 0.45 (1:1 hex:EtOAc)

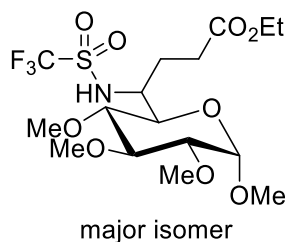

**<sup>1</sup>H NMR** (CDCl<sub>3</sub>, 400 MHz) δ 5.38 (d, *J* = 9.6 Hz, 1H), 4.82 (d, *J* = 3.6 Hz, 1H), 4.17 (q, *J* = 7.1 Hz, 2H), 3.94 (q, *J* = 7.5 Hz, 1H), 3.64 (s, 3H), 3.63 (s, 3H), 3.61-3.53 (m, 2H), 3.54 (s, 3H), 3.43 (s, 3H), 3.21-3.16 (m, 2H), 2.54-2.40 (m, 2H), 2.10-1.94 (m, 2H), 1.28 (t, *J* = 7.1 Hz, 3H); **<sup>13</sup>C NMR** (CDCl<sub>3</sub>, 100 MHz) δ 172.42, 119.48 (q, *J* = 320.5), 97.76, 83.77, 81.67, 78.64, 70.24, 60.76, 60.67, 60.25, 59.19, 55.19, 55.67, 54.63, 30.55, 28.13, 14.13; **<sup>19</sup>F NMR** (CDCl<sub>3</sub>, 376 MHz): -77.30; **IR (CDCl<sub>3</sub> solution)** 3320 (*br*), 2940 (*m*), 1734 (*s*), 1448 (*s*), 1374 (*s*), 1230 (*s*), 1190 (*s*), 1152 (*s*), 1096 (*s*), 1052 (*s*), 1030 (*s*), 620 (*s*) cm<sup>-1</sup>; **HRMS-ASAP** (negative): *M* = C<sub>16</sub>H<sub>28</sub>F<sub>3</sub>NO<sub>9</sub>S; expected (*M*-H)<sup>-</sup> *m/z* 466.1359, observed (*M*-H)<sup>-</sup> *m/z* 466.1350.

***tert*-butyl 5-((*tert*-butoxycarbonyl)amino)-4-  
((trifluoromethyl)sulfonamido)pentanoate (3la)**

Prepared according to **Procedure B** (with 3.0 equiv. of *tert*-butyl acrylate). Colorless oil (22.1 mg, 53% yield).  $R_f = 0.40$  (3:1 hex:EtOAc).

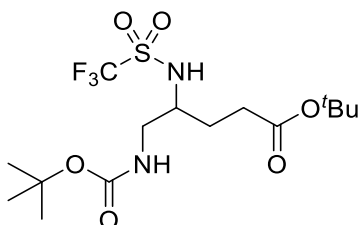

$^1\text{H NMR}$  ( $\text{CDCl}_3$ , 400 MHz)  $\delta$  6.86 (brs, 1H), 4.98 (brs, 1H), 3.65-3.59 (m, 1H), 3.35-3.23 (m, 2H), 2.46-2.32 (m, 2H), 1.92-1.76 (m, 2H), 1.44 (s, 18H);  $^{13}\text{C NMR}$  ( $\text{CDCl}_3$ , 100 MHz):  $\delta$  172.7, 157.5, 119.7 (q,  $J = 321$  Hz), 81.3, 80.7, 56.6, 44.5, 31.2, 28.2, 28.0, 27.8;  $^{19}\text{F NMR}$  ( $\text{CDCl}_3$ , 376 MHz):  $-77.1$ ; **IR** (neat) 3155(*s*), 2978(*m*), 2933(*m*), 1692(*s*), 1520(*s*), 1454(*s*), 1368(*s*), 1228(*s*), 1184(*s*), 1149(*s*), 998(*m*), 845(*m*), 613(*s*)  $\text{cm}^{-1}$ ; **HRMS-ASAP** (negative):  $M = \text{C}_{15}\text{H}_{27}\text{F}_3\text{N}_2\text{O}_6\text{S}$ ; expected  $(M-H)^- m/z$  419.1464, observed  $(M-H)^- m/z$  419.1461;

***tert*-butyl 4-(4-(*tert*-butoxy)-4-oxo-1-  
((trifluoromethyl)sulfonamido)butyl)piperidine-1-carboxylate (3ma)**

Prepared according to **Procedure B** (with 3.0 equiv. of *tert*-Butyl acrylate). Colorless oil (33.2 mg, 70% yield).  $R_f = 0.46$  (3:1 hex:EtOAc).

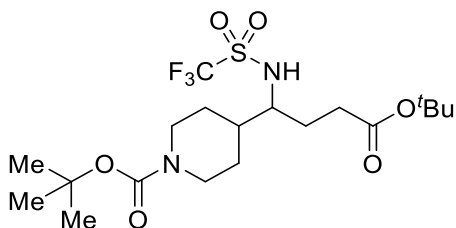

$^1\text{H NMR}$  ( $\text{CDCl}_3$ , 400 MHz)  $\delta$  6.14 (brs, 1H), 4.11 (brs, 2H), 3.38 (dt,  $J = 9.2, 4.8$  Hz, 2H), 2.58 (t,  $J = 9.2$  Hz, 2H), 2.38-2.24 (m, 2H), 1.86-1.78 (m, 1H), 1.73-1.58 (m, 4H), 1.38 (s, 9H), 1.37 (s, 9H), 1.26-1.12 (m, 2H);  $^{13}\text{C NMR}$  ( $\text{CDCl}_3$ , 100 MHz): 173.0, 154.7, 119.6 (q,  $J = 319$  Hz), 81.6, 79.4, 59.9, 43.8 (brs), 41.0, 31.4, 28.4, 28.0, 27.6

---

(brs), 26.0;  $^{19}\text{F}$  NMR ( $\text{CDCl}_3$ , 376 MHz):  $-77.1$ ; **IR (neat)** 3132(*s*), 2976(*m*), 2864(*m*), 1728(*s*), 1694(*s*), 1660(*s*), 1428(*s*), 1367(*s*), 1184(*s*), 1063(*s*), 857(*m*)  $\text{cm}^{-1}$ ; **HRMS-ASAP** (negative):  $\text{M} = \text{C}_{19}\text{H}_{33}\text{F}_3\text{N}_2\text{O}_6\text{S}$ ; expected  $(\text{M}-\text{H})^-$   $m/z$  473.1933, observed  $(\text{M}-\text{H})^-$   $m/z$  473.1932;

**9-(*tert*-butyl) 1-methyl (2*S*)-2-((*tert*-butoxycarbonyl)amino)-6-((trifluoromethyl)sulfonamido)nonanedioate (3na)**

Prepared according to **Procedure B** (with 3.0 equiv. of *tert*-butyl acrylate). Colorless oil (~1:1 mixed diastereomers, 30.2 mg, 58% yield).  $R_f = 0.46$  (2:1 hex:EtOAc).

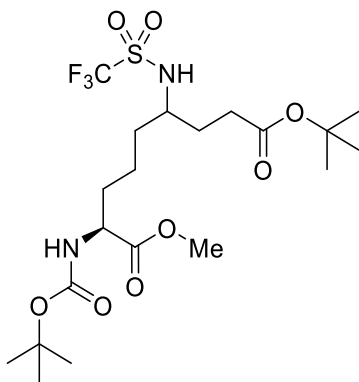

$^1\text{H}$  NMR ( $\text{CDCl}_3$ , 400 MHz)  $\delta$  6.01 (dd,  $J = 20.0, 7.9$  Hz, 1H), 5.14 (dd,  $J = 25.1, 8.3$  Hz, 1H), 4.29 (brs, 1H), 3.74 (s, 3H), 3.63-3.42 (m, 1H), 2.47-2.26 (m, 2H), 2.44-2.29 (m, 8H), 1.44-1.43 (m, 18H);  $^{13}\text{C}$  NMR ( $\text{CDCl}_3$ , 101 MHz)  $\delta$  173.27, 173.19, 173.03, 156.14, 155.71, 119.7 (q,  $J = 321.2$  Hz), 81.56, 81.40, 80.57, 80.35, 55.87, 55.80, 53.05, 52.60, 52.54, 35.00, 34.08, 33.06, 32.89, 31.47, 31.43, 30.62, 29.50, 28.43, 28.16, 21.12, 21.01;  $^{19}\text{F}$  NMR ( $\text{CDCl}_3$ , 376 MHz):  $-77.16, -77.35$ ; **IR (neat)** 3186(*s*), 2977(*s*), 1704(*s*), 1511(*s*), 1445(*s*), 1367(*s*), 1227(*s*), 1152(*s*), 1053(*m*), 998(*m*), 846(*m*), 613(*s*)  $\text{cm}^{-1}$ ; **HRMS-ASAP** (negative):  $\text{M} = \text{C}_{20}\text{H}_{35}\text{F}_3\text{N}_2\text{O}_8\text{S}$ ; expected  $(\text{M}-\text{H})^-$   $m/z$  519.1988, observed  $(\text{M}-\text{H})^-$   $m/z$  519.1984.

**ethyl 5-(benzyloxy)-4-((trifluoromethyl)sulfonamido)pentanoate (3oa)**

Prepared according to **Procedure B** (with 1.5 equiv. of Ethyl acrylate). Colorless oil (22.2 mg, 58% yield).  $R_f = 0.29$  (6:1 hex:EtOAc).

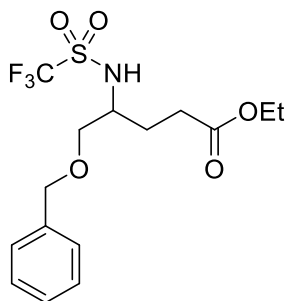

**<sup>1</sup>H NMR** (CDCl<sub>3</sub>, 400 MHz) δ 7.41-7.32 (m, 5H), 5.55 (d, *J* = 9.0 Hz, 1H), 4.58 (d, *J* = 11.9 Hz, 1H), 4.54 (d, *J* = 11.9 Hz, 1H), 4.16 (q, *J* = 7.2 Hz, 2H), 3.80-3.72 (m, 1H), 3.62-3.55 (m, 2H), 2.53-2.40 (m, 2H), 2.10-1.94 (m, 2H), 1.28 (t, *J* = 7.1 Hz, 3H); **<sup>13</sup>C NMR** (CDCl<sub>3</sub>, 100 MHz): δ 173.2, 137.2, 128.6, 128.1, 127.8, 119.6 (q, *J* = 321 Hz), 73.6, 71.4, 60.9, 55.1, 30.3, 27.5, 14.1; **<sup>19</sup>F NMR** (CDCl<sub>3</sub>, 376 MHz): -77.6; **IR (neat)** 3214(*s*), 2876(*m*), 1712(*s*), 1442(*s*), 1227(*s*), 1184(*s*), 1147(*s*), 1015(*s*), 1055(*s*), 910(*m*), 741(*s*), 698(*s*), 609(*s*) cm<sup>-1</sup>; **HRMS-ASAP** (negative): *M* = C<sub>15</sub>H<sub>20</sub>F<sub>3</sub>NO<sub>5</sub>S; expected (*M*-H)<sup>-</sup> *m/z* 382.0936, observed (*M*-H)<sup>-</sup> *m/z* 382.0939;

***tert*-butyl 7-phenyl-4-((trifluoromethyl)sulfonamido)heptanoate (3pa)**

Prepared according to **Procedure B** (with 3.0 equiv. of *tert*-butyl acrylate). Colorless oil (30.4 mg, 74% yield). *R*<sub>f</sub> = 0.38 (7:1 hex:EtOAc).

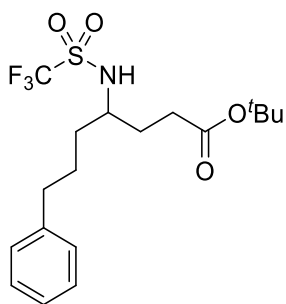

**<sup>1</sup>H NMR** (CDCl<sub>3</sub>, 400 MHz) δ 7.31-7.26 (m, 2H), 7.22-7.15 (m, 3H), 5.60 (brs, 1H), 3.58 (brs, 1H), 2.56 (t, *J* = 7.5, 2H), 2.42-2.26 (m, 2H), 1.95-1.83 (m, 1H), 1.79-1.66 (m, 3H), 1.65-1.58 (m, 2H), 1.44 (s, 9H); **<sup>13</sup>C NMR** (CDCl<sub>3</sub>, 100 MHz): 173.1, 141.5, 128.4, 128.3, 126.0, 119.6 (q, *J* = 319), 81.5, 56.0, 35.4, 35.3, 31.3, 29.4, 28.0, 26.9; **<sup>19</sup>F NMR** (CDCl<sub>3</sub>, 376 MHz): -77.4; **IR (neat)** 3219(*s*), 2978(*m*), 2933(*m*), 1727(*s*), 1699(*s*), 1453(*s*), 1369(*s*), 1227(*s*), 1186(*s*), 1147(*s*), 1005(*m*), 843(*m*), 749(*s*), 615(*s*) cm<sup>-1</sup>;

**HRMS-ASAP** (negative): M = C<sub>18</sub>H<sub>26</sub>F<sub>3</sub>NO<sub>4</sub>S; expected (M-H)<sup>-</sup> *m/z* 408.1456, observed (M-H)<sup>-</sup> *m/z* 408.1457;

***tert*-butyl 7-methyl-4-((trifluoromethyl)sulfonamido)octanoate (3qa)**

Prepared according to **Procedure B** (with 3.0 equiv. of *tert*-butyl acrylate). Light yellow oil (23.9 mg, 65% yield). R<sub>f</sub> = 0.4 (9:1 hex:EtOAc).

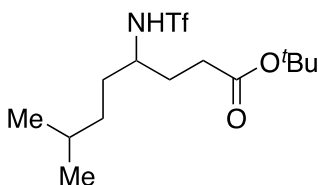

<sup>1</sup>H NMR (CDCl<sub>3</sub>, 400 MHz) δ 5.74 (d, *J* = 8.8 Hz, 1H), 3.57-3.48 (m, 1H), 2.41-2.32 (m, 2H), 1.93-1.85 (m, 1H), 1.80-1.70 (m, 1H), 1.61-1.48 (m, 3H), 1.44 (s, 9H), 1.29-1.17 (m, 2H), 0.88 (dd, *J* = 6.6, 1.3 Hz, 6H); <sup>13</sup>C NMR (CDCl<sub>3</sub>, 100 MHz) δ 173.32, 119.80 (q, *J* = 321.1 Hz), 81.55, 56.54, 34.32, 33.75, 31.63, 29.74, 28.13, 22.59, 22.4; <sup>19</sup>F NMR (CDCl<sub>3</sub>, 376 MHz): δ 77.50; **IR** (CDCl<sub>3</sub> solution) 3213(*w, br*), 2949(*w*), 1699(*s*), 1455(*s*), 1369(*s*), 1227(*s*), 1186(*s*), 1150(*s*), 1063(*m*), 995(*m*), 844(*m*), 756(*m*), 616(*s*) cm<sup>-1</sup>; **HRMS-ASAP** (negative): M = C<sub>14</sub>H<sub>26</sub>F<sub>3</sub>NO<sub>4</sub>S: expected (M-H)<sup>-</sup> *m/z* 360.1456, observed (M-H)<sup>-</sup> *m/z* 360.1455.

***tert*-butyl 4-((trifluoromethyl)sulfonamide)undecanoate (3ra)**

Prepared according to **Procedure B** (1,1,1-trifluoro-*N*-octylmethanesulfonamide and KH were pre-stirred for 1.5h) with 3.0 equiv of *tert*-butyl acrylate. Colorless oil (22.4 mg, 58% yield). R<sub>f</sub> = 0.4 (7:3 hex:EtOAc).

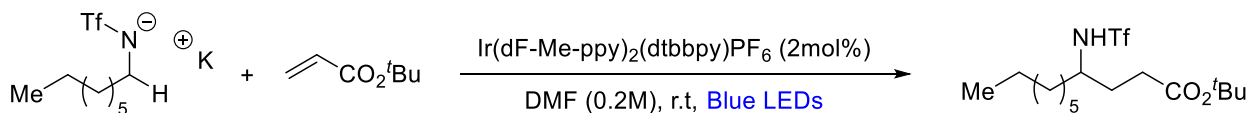

<sup>1</sup>H NMR (CDCl<sub>3</sub>, 400 MHz) δ 5.77 (d, 1H), 3.54 (brs, 1H), 2.43-2.30 (m, 2H), 1.93-1.85 (m, 1H), 1.79-1.70 (m, 1H), 1.57 (q, *J* = 7.5 Hz, 2H), 1.44 (s, 9H), 1.37-1.26 (m, 10H), 0.87 (t, *J* = 6.4 Hz, 3H); <sup>13</sup>C NMR (CDCl<sub>3</sub>, 1001 MHz) δ 173.33, 119.80 (q, *J* = 321.1 Hz), 81.53, 56.32, 35.92, 31.84, 31.64, 29.84, 29.40, 29.19, 28.12, 25.37, 22.72, 14.15.

$^{19}\text{F}$  NMR ( $\text{CDCl}_3$ , 376 MHz)  $\delta$  -77.5. MS (ESI, negative):  $\text{M} = \text{C}_{16}\text{H}_{30}\text{F}_3\text{NO}_4\text{S}$ :  
expected  $(\text{M}-\text{H})^-$   $m/z$  388.18, observed  $(\text{M}-\text{H})^-$   $m/z$  388.2.

## Mechanistic Investigations

**1. Cyclic Voltammetry (CV) Study:** a glassy electrode, a Pt mesh counter electrode and an Ag/AgCl reference electrode were used and measurement was taken in a 10 mM solution of a specific compound in DMF containing 0.1 M  $\text{NBu}_4\text{PF}_6$ .

- CV study of amide **1a**: no oxidation was observed even at voltage  $>2\text{V}$  vs Ag/AgCl.
- CV study of **1a** potassium salt: **1a** potassium salt was prepared by treatment of **1a** with 1.0 equiv of KH in DMF (0.1 M). As shown below,  $E_p$  and  $E_{1/2}$  of **1a** potassium salt were determined to be 1.33 V and 1.22 V vs Ag/AgCl (i.e. 1.28 V and 1.17 V vs SCE in DMF) in DMF).

Figure S1. CV Potassium Salt of Triflamide 1a

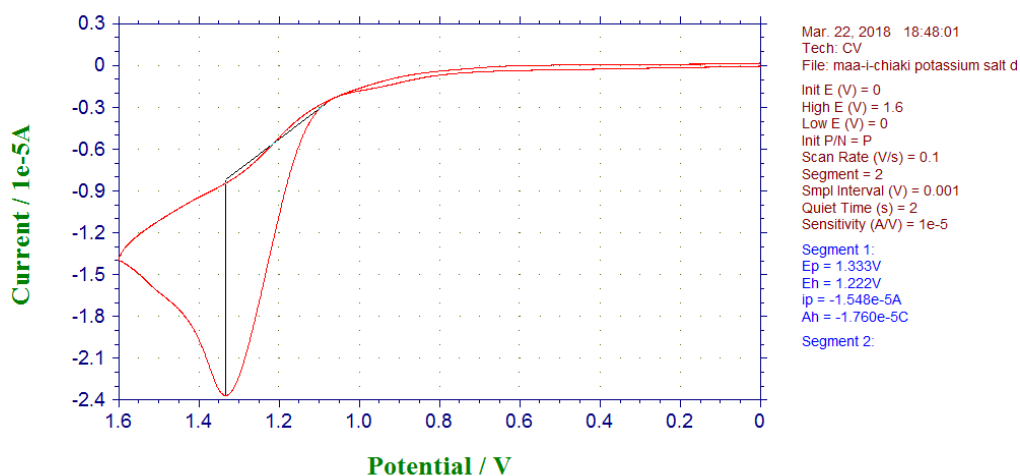

- CV study of quinuclidine: As shown below  $E_p$  and  $E_{1/2}$  were determined to be 1.23 V and 1.12 V vs Ag/AgCl (i.e. 1.18 V and 1.07 V vs SCE in DMF).

Figure S2. CV of Quinuclidine

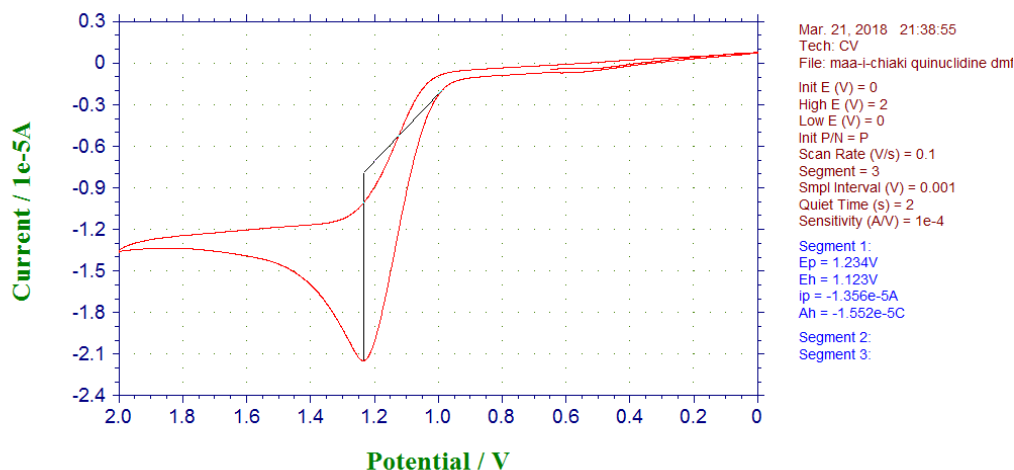

## 2. Stern-Volmer

Stern-Volmer experiments were conducted with 0.01 mM Ir[(dF-Me-ppy)<sub>2</sub>(dtbbpy)]PF<sub>6</sub> and varying amounts of quinuclidine, **1a**, or potassium salt of **1r**. The solutions were irradiated at 380 nm and emission was measured at 520 nm.

|     |               | Quinuclidine Concentration |          |          |          |          |
|-----|---------------|----------------------------|----------|----------|----------|----------|
| Run |               | 0.0 mM                     | 2.0 mM   | 4.0 mM   | 6.0 mM   | 8.0 mM   |
| 1   | $I_0/I$       | 1                          | 1.276872 | 1.541653 | 1.826741 | 2.083945 |
| 2   | $I_0/I$       | 1                          | 1.203439 | 1.450313 | 1.692283 | 1.942088 |
| 3   | $I_0/I$       | 1                          | 1.196164 | 1.413874 | 1.658337 | 1.897209 |
|     | $I_0/I_{avg}$ | 1                          | 1.225492 | 1.468614 | 1.725787 | 1.974414 |

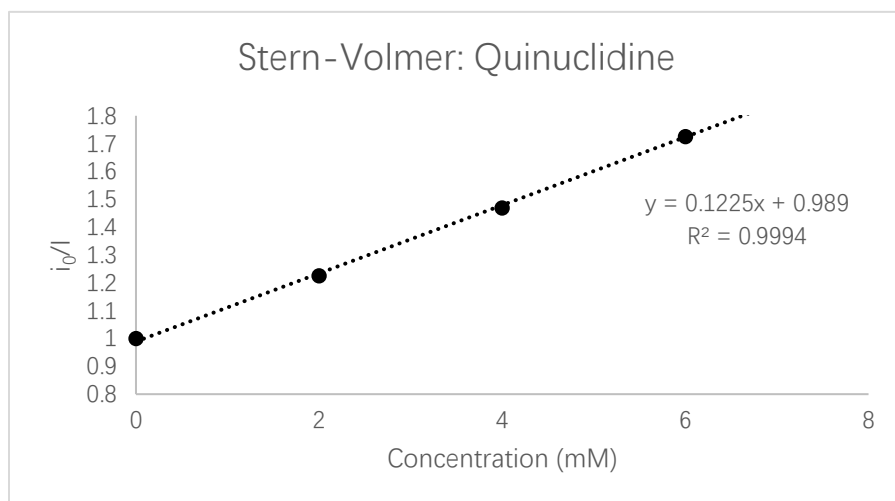

|     |               | Potassium Salt of <b>1r</b> Concentration |          |          |          |          |
|-----|---------------|-------------------------------------------|----------|----------|----------|----------|
| Run |               | 0.0 mM                                    | 2.0 mM   | 4.0 mM   | 6.0 mM   | 8.0 mM   |
| 1   | $I_0/I$       | 1                                         | 1.011224 | 1.02079  | 1.039604 | 1.057669 |
| 2   | $I_0/I$       | 1                                         | 1.02097  | 1.024548 | 1.033015 | 1.036779 |
|     | $I_0/I_{avg}$ | 1                                         | 1.016097 | 1.022669 | 1.03631  | 1.047224 |

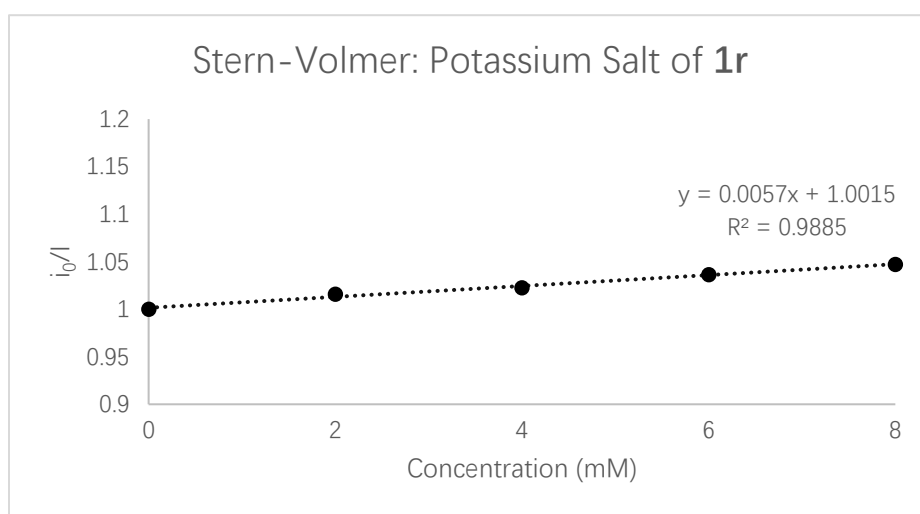

|  |               | Triflamide <b>1a</b> Concentration |          |          |          |          |
|--|---------------|------------------------------------|----------|----------|----------|----------|
|  |               | 0.0 mM                             | 0.2 mM   | 0.4 mM   | 0.6 mM   | 0.8 mM   |
|  | $I_0/I$       | 1                                  | 1.010333 | 0.969121 | 0.963478 | 0.97934  |
|  | $I_0/I$       | 1                                  | 1.001819 | 0.974922 | 0.965405 | 0.981578 |
|  | $I_0/I_{avg}$ | 1                                  | 1.006076 | 0.972021 | 0.964441 | 0.980459 |



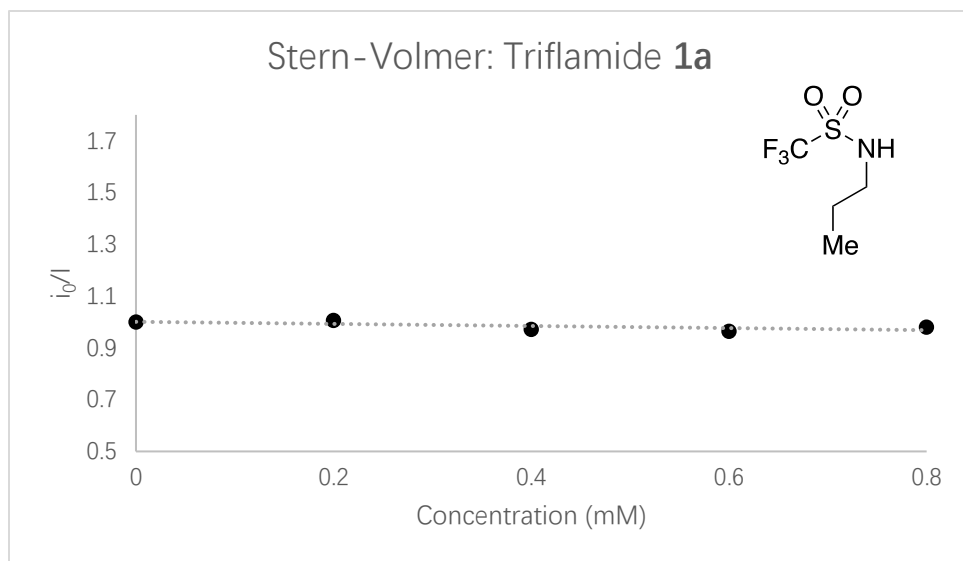

### 3. On/Off Studies

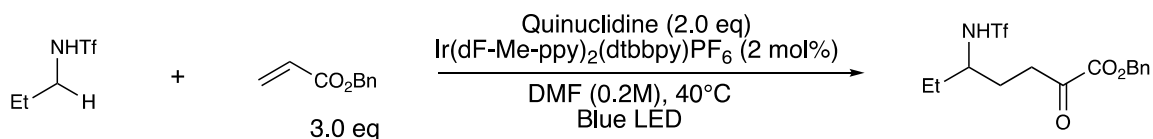

The above reaction was set up according to Procedure B (19.1 mg of starting material, 2 mol% [Ir] photocatalyst, 3.0 equiv. of alkene, 2 equiv. quinuclidine, 0.5 mL DMF; run under an atmosphere of argon). The reaction was irradiated with Blue LED for one hour. An aliquot (20  $\mu\text{L}$ ) was taken and added to a vial containing internal standard Mesitylene. The yield was determined by UPLC-MS diode-array. The reaction was then covered by aluminum foil and stirred for an hour. Yield was determined in the same way. The reaction was monitored for 5 hours.

Figure S3. On/Off Study

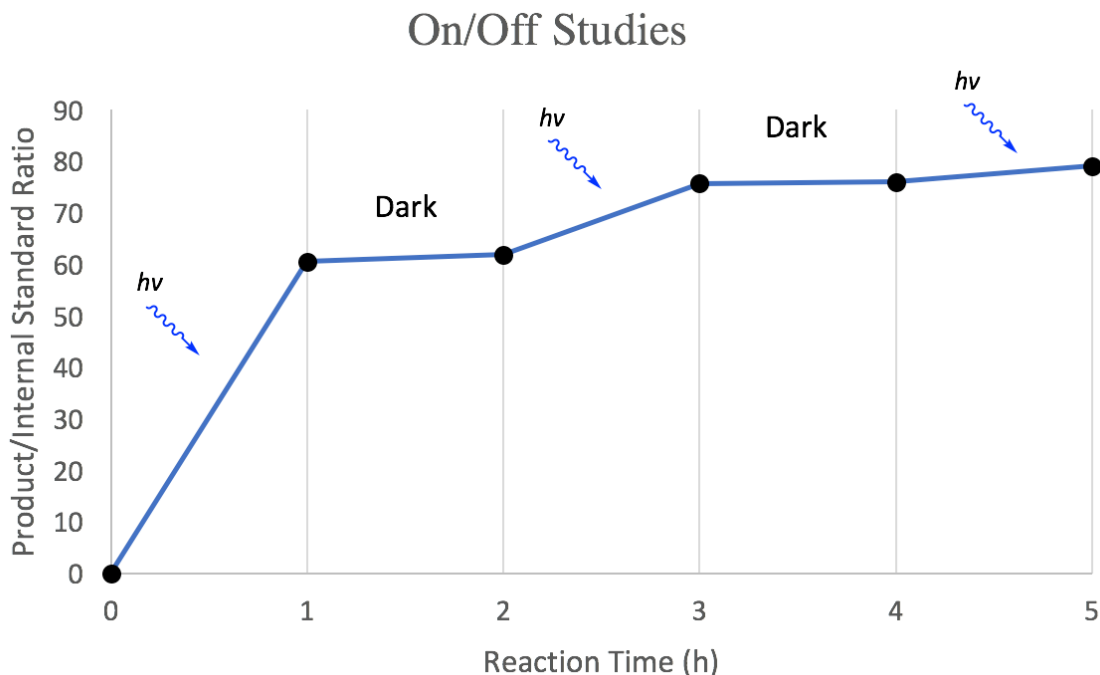

#### 4.0 Deuterium Incorporation

*tert*-butyl 6-phenyl-4-((trifluoromethyl)sulfonamide)hexanoate-4-d with incorporated *tert*-butyl 6-phenyl-4-((trifluoromethyl)sulfonamide)hexanoate-2,4-d<sub>2</sub> (**3sa**)

**Quinuclidine Conditions:** Prepared according to **Procedure B** (with 3.0 equiv *tert*-butyl acrylate). Colorless oil (26.85mg, 68% yield)

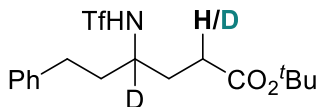

Quinuclidine: 6% **D** (68% yield)

**K<sub>3</sub>PO<sub>4</sub> Conditions:** Prepared according to an adjusted **Procedure B** (2.0 equiv. of K<sub>3</sub>PO<sub>4</sub> instead of quinuclidine; 3.0 equiv. *tert*-butyl acrylate). Colorless oil (23.6mg, 60% yield)

#### Quinuclidine Conditions - NMRs

<sup>1</sup>H NMR (CDCl<sub>3</sub>, 400 MHz) δ 7.32-7.28 (m, 2H), 7.23-7.17 (m, 3H), 5.89 (s, 1H), 2.76-2.66 (m, 2H), 2.46-2.35 (m, 1.87), 1.99-1.80 (m, 4H), 1.45 (s, 9H); <sup>2</sup>H NMR (CDCl<sub>3</sub>, 400

MHz)  $\delta$  3.62 (1H), 2.39 (0.33H);  $^{13}\text{C}$  NMR ( $\text{CDCl}_3$ , 100 MHz)  $\delta$  173.39, 140.79, 128.74, 128.38, 126.40, 119.17 (q,  $J = 321.0$  Hz), 81.74, 55.65 (t,  $J = 20.8$ ), 37.57, 31.73, 31.51, 31.43, 31.38, 31.23, 31.08, 29.53, 29.48, 28.11, 28.10; ( $^{13}\text{C}$ - $^2\text{H}$  coupling)  $^{19}\text{F}$  NMR ( $\text{CDCl}_3$ , 376 MHz) 76.49; IR (neat) 3208.93 (brs), 2979.14 (m), 1698.46 (s), 1423.23 (m), 1367.78 (s), 1228.71 (s), 1188.32 (s), 1148.61 (s), 1000.44 (m), 843.25 (m), 744.89 (m), 699.78 (m), 614.12 (s), 514.14 (m)  $\text{cm}^{-1}$ ; HRMS-ASAP (negative):  $M = \text{C}_{17}\text{H}_{23}\text{DF}_3\text{NO}_4\text{S}$  (major)  $\text{C}_{17}\text{H}_{22}\text{D}_2\text{F}_3\text{NO}_4\text{S}$  (minor); expected  $(M-H)^- m/z$  395.1363 (major) 396.1425 (minor), observed  $(M-H)^- m/z$  395.1357 (major) 396.1405 (minor).

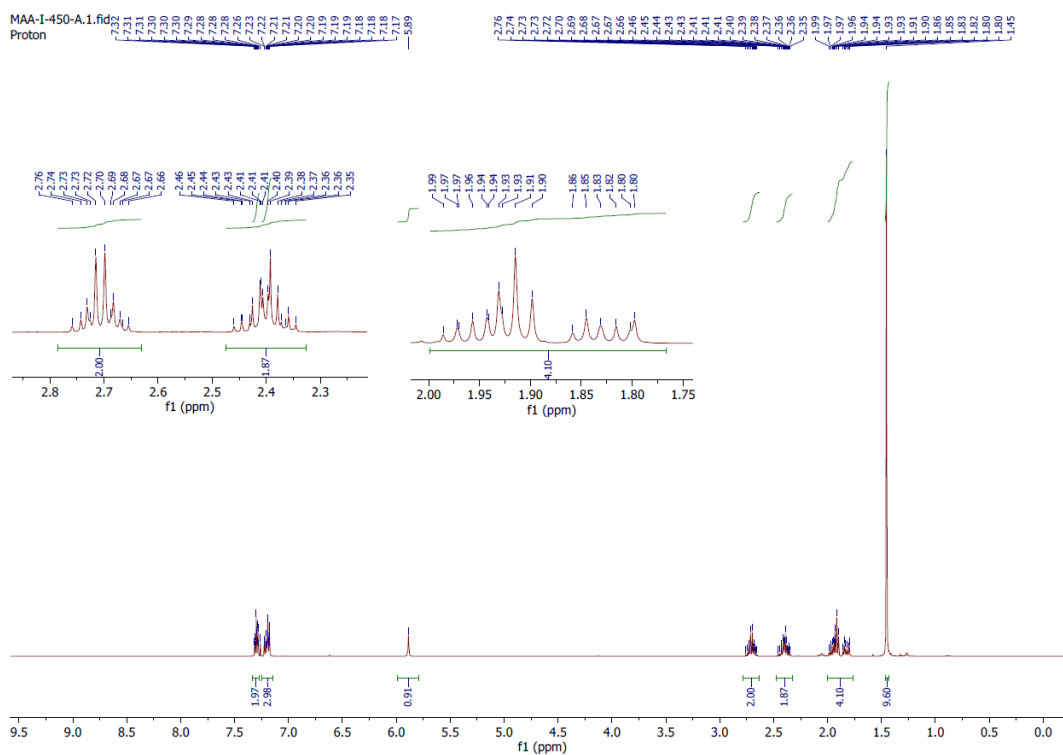

MAA-I-150-A-deuterium.1.fid  
2H observe through lock channel

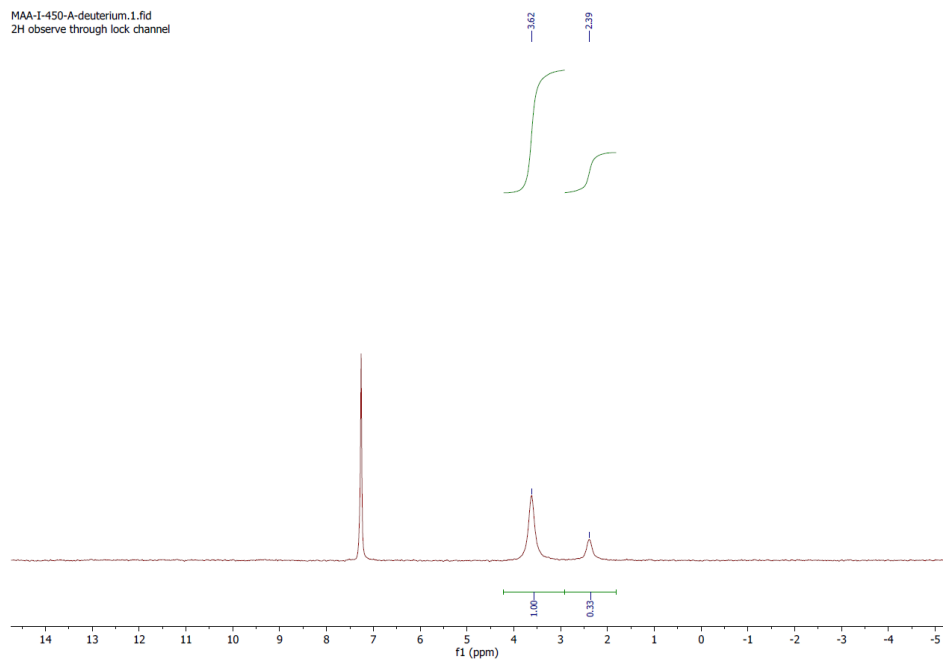

MAA-I-450-A.2.fid  
19F

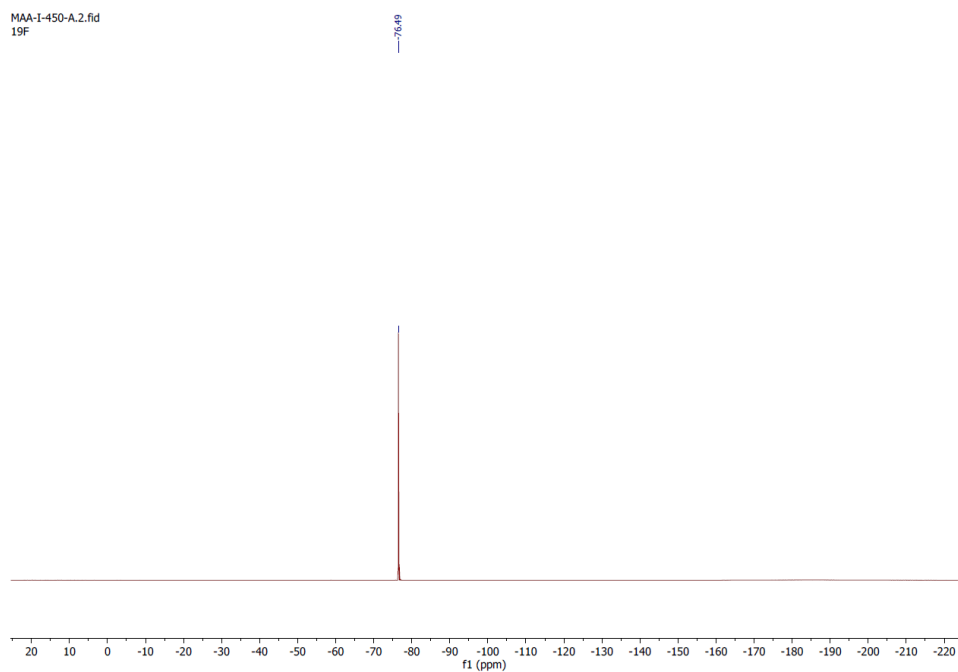

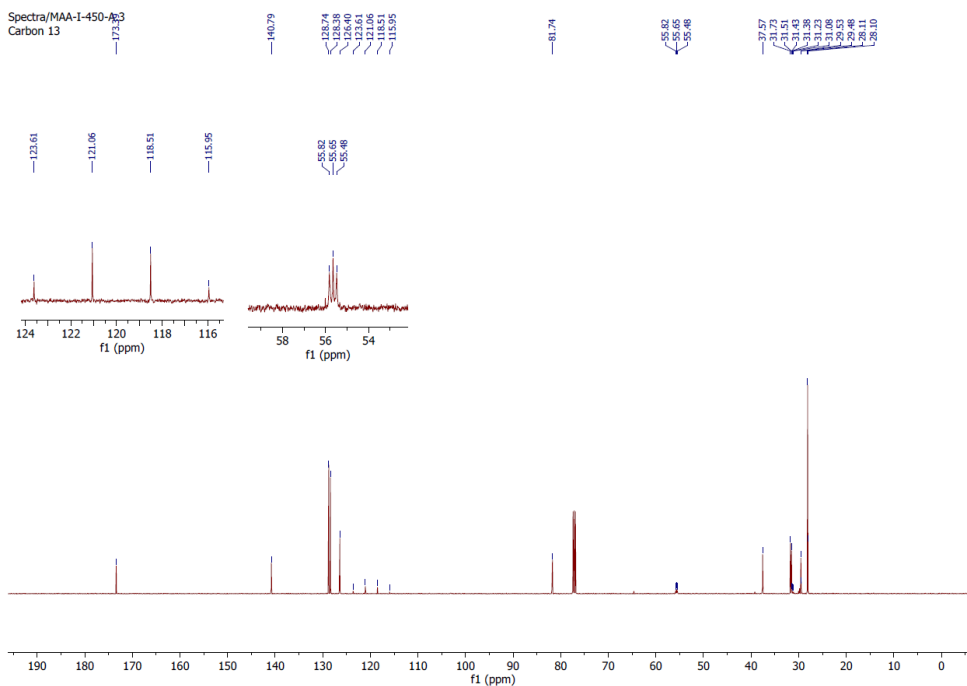

### **K<sub>3</sub>PO<sub>4</sub> Conditions**

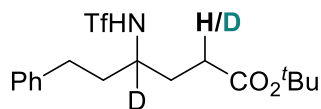

K<sub>3</sub>PO<sub>4</sub>: <1% **D** (60% yield)

**<sup>1</sup>H NMR** (CDCl<sub>3</sub>, 400 MHz) δ 7.32-7.28 (m, 2H), 7.23-7.17 (m, 3H), 5.84 (s, 1H), 2.76-2.65 (m, 2H), 2.46-2.34 (m, 2H), 1.98-1.80 (m, 4H), 1.45 (s, 9H); **<sup>2</sup>H NMR** (CDCl<sub>3</sub>, 400 MHz) δ 3.62 (1H), 2.40 (0.05H); **<sup>13</sup>C NMR** (CDCl<sub>3</sub>, 100 MHz) δ 173.40, 140.78, 128.74, 128.38, 126.41, 119.17 (q, *J* = 321.0 Hz), 81.74, 55.67 (t, *J* = 20.8), 37.57, 31.73, 31.50, 29.49, 28.12; (13C-2H coupling) **<sup>19</sup>F NMR** (CDCl<sub>3</sub>, 376 MHz) 76.48; **IR** (CDCl<sub>3</sub>) 3209.93 (brs), 2979.25 (brs), 1698.83 (s), 1433.92 (m), 1367.82 (s), 1229.03 (m), 1189.13 (s), 1148.96 (s), 1001.02 (m), 844.02 (m), 740.21 (m), 700.22 (m), 614.33 (s) cm<sup>-1</sup>;  
**HRMS-ASAP** (negative): M = C<sub>17</sub>H<sub>23</sub>DF<sub>3</sub>NO<sub>4</sub>S (major) C<sub>17</sub>H<sub>22</sub>D<sub>2</sub>F<sub>3</sub>NO<sub>4</sub>S (minor); expected (M-H)<sup>-</sup> *m/z* 395.1363 (major) 396.1425 (minor), observed (M-H)<sup>-</sup> *m/z* 395.1365 (major) 396.1401 (minor).



MAA-I-450-B.2.fid  
19F

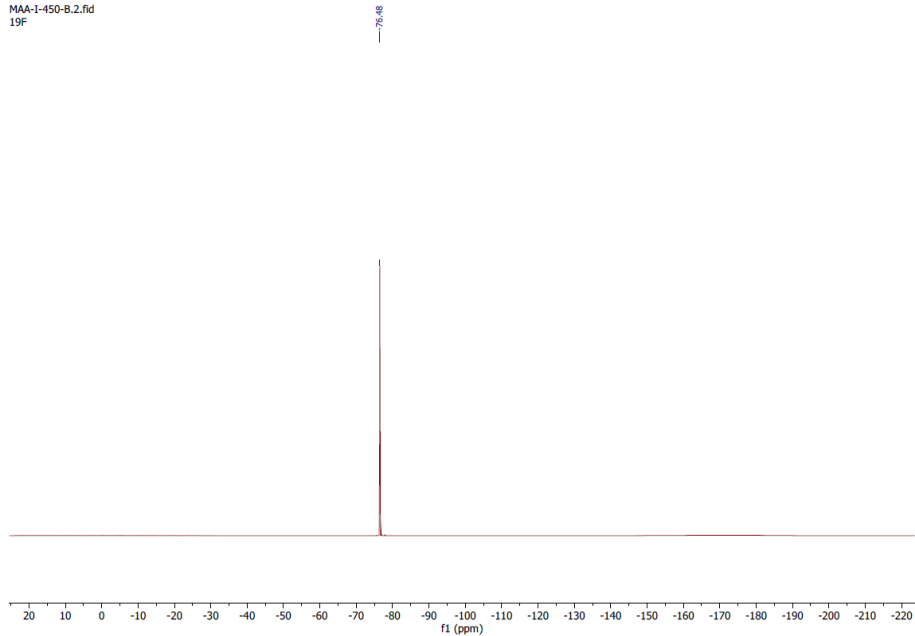

MAA-I-450-B.3.fid  
Carbon 13

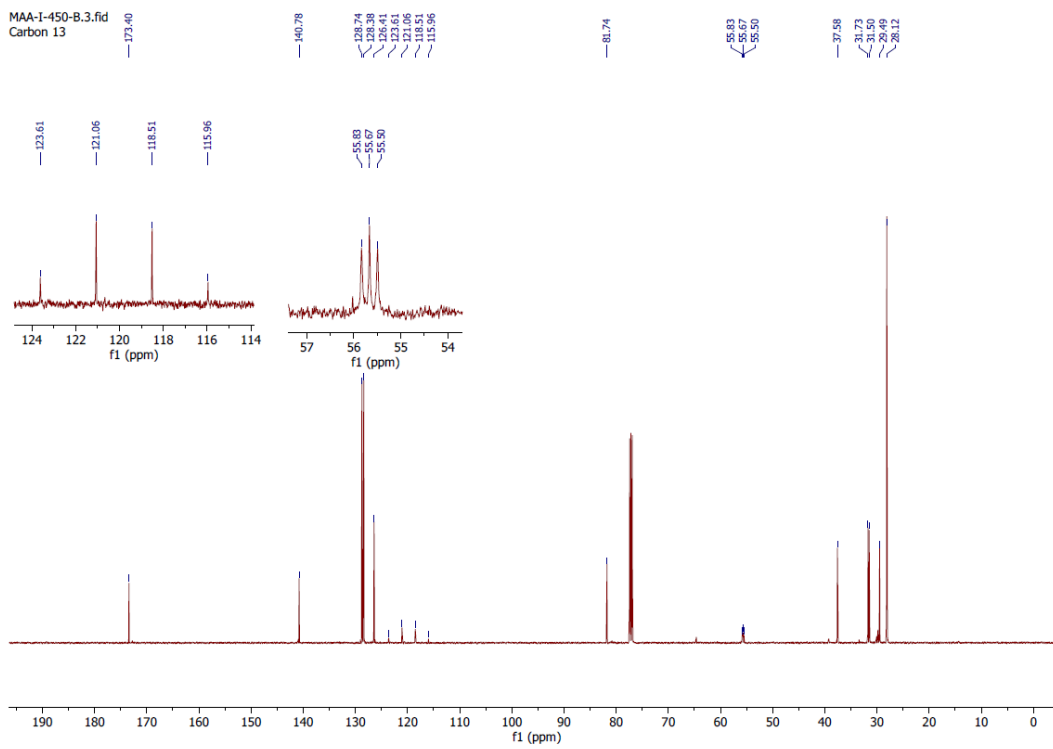

## 5.0 Hydridic $\alpha$ -hydrogens

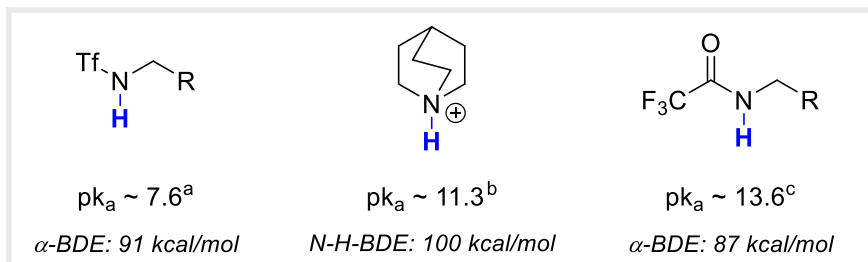

### Trifluoroacetamide - Quinuclidine Conditions

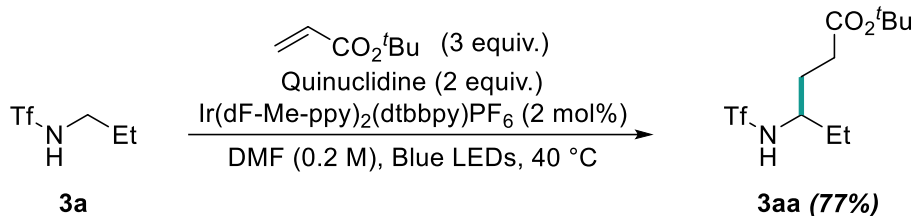

### Trifluoroacetamide Potassium Salt as HAT Agent

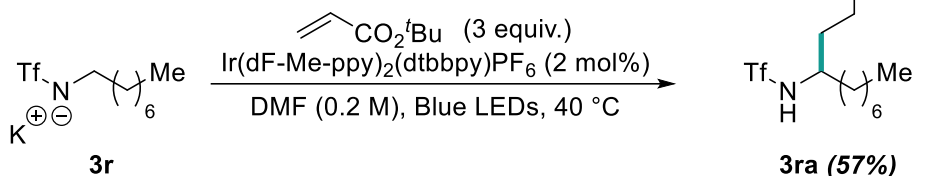

### Trifluoroacetamide - Quinuclidine Conditions

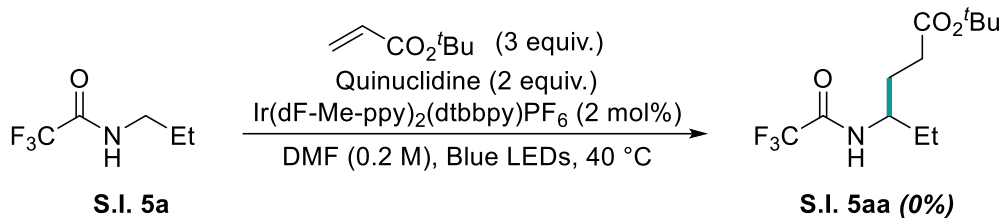

### Trifluoroacetamide Potassium Salt - Quinuclidine Conditions

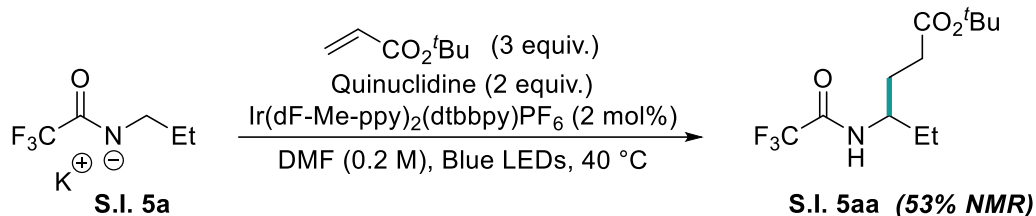

### Trifluoroacetamide Potassium Salt as HAT Agent

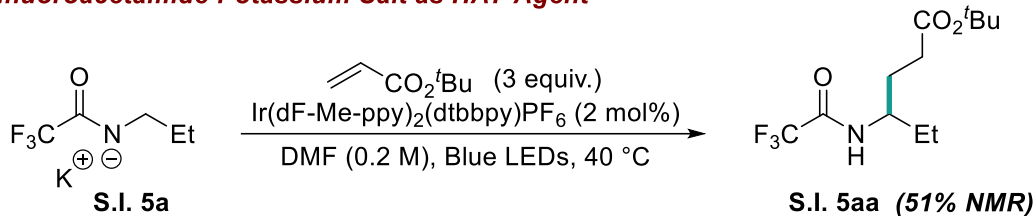

a) Trepka, R.D; Harrington, J.K; Belisle, J.W; *J. Org. Chem.* **1974**, *39*, 8, 1094.



- b) Aggarwal, V.K; Emmel, I.; Fulford, S.Y.; *J. Org. Chem.* **2003**, *68*, 692.  
 c) Li, J. J. *Named Reactions for Functional Group Transformation* 423–437 (Wiley, 2007).

### 2,2,2-trifluoro-*N*-propylacetamide (S.I. 5a)

Prepared according to **Procedure A** from commercially available propylamine (591 mg, 10 mmol). Colorless oil (826.0 m g, 53% yield).  $R_f = 0.75$  (6:1 hex:EtOAc).

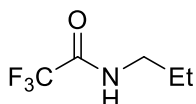

$^1\text{H NMR}$  ( $\text{CDCl}_3$ , 400 MHz)  $\delta$  7.19 (brs, 1H), 3.26 (q,  $J = 6.8$  Hz, 2H), 1.57 (h,  $J = 7.4$  Hz, 2H), 0.90 (t,  $J = 7.4$  Hz, 2H);  $^{13}\text{C NMR}$  ( $\text{CDCl}_3$ , 100 MHz):  $\delta$  157.70 (q,  $J = 36.7$  Hz), 116.08 (q,  $J = 287.3$  Hz), 41.73, 22.14, 11.00;  $^{19}\text{F NMR}$  ( $\text{CDCl}_3$ , 376 MHz):  $-76.32$ ; **IR (neat)** 3304.22 (brs), 3106.04 (brs), 2971.16 (brs), 1702.07 (s), 1560.97 (m), 1462.27 (m), 1371.40 (m), 1347.95 (m), 1252.39 (m), 1156.49 (s), 920.60 (m), 721.91 (s), 525.08 (m)  $\text{cm}^{-1}$ ; **MS (ESI, positive)**:  $M = \text{C}_5\text{H}_8\text{F}_3\text{NO}$ ; expected  $(M+H)^+$  156.0  $m/z$ , observed  $(M+H)^+$   $m/z$  156.0.

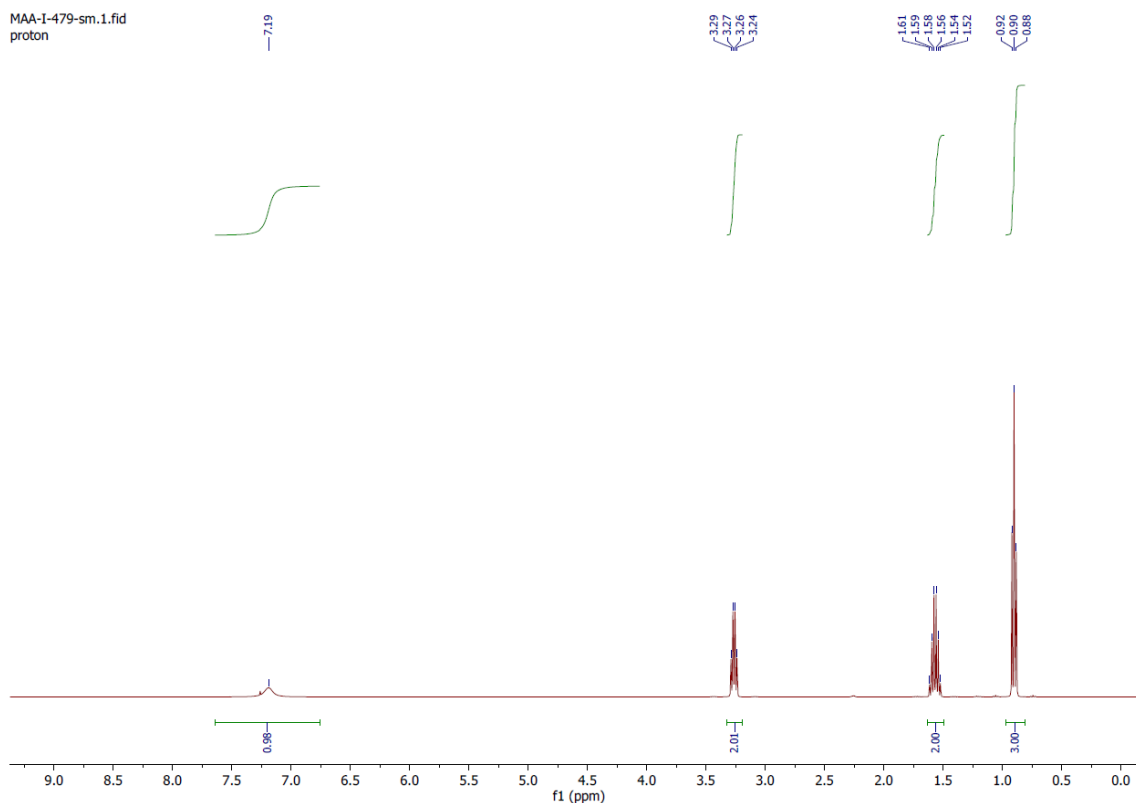

MAA-I-479-sm.3.fid

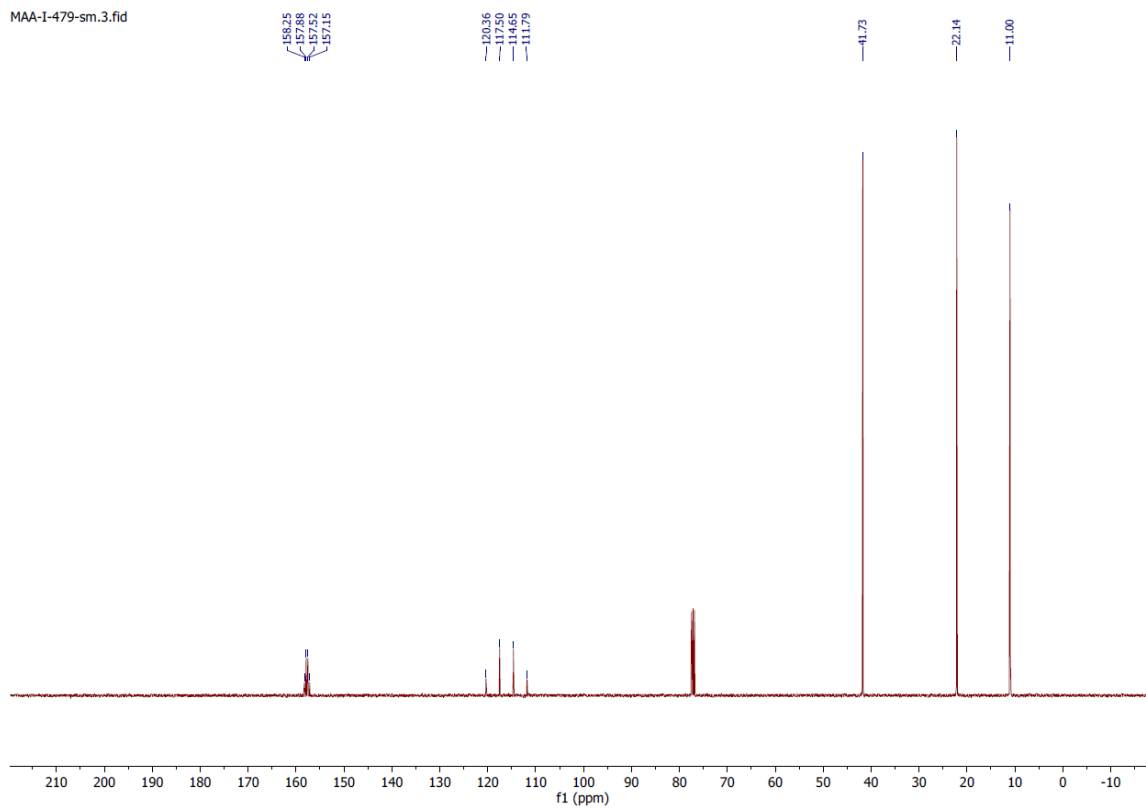

MAA-I-479-sm.2.fid  
F19

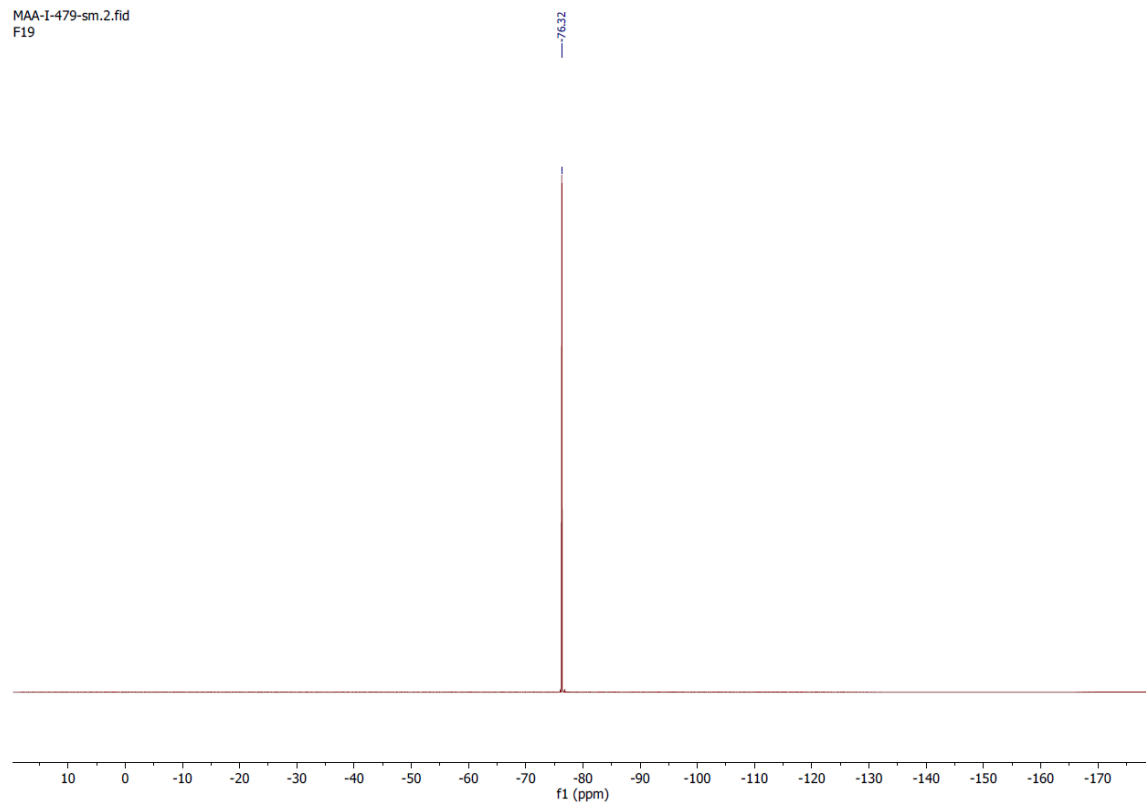

***tert*-butyl 4-(2,2,2-trifluoroacetamido)hexanoate (S.I. 5aa)**

Prepared according to **Procedure B** (with 3.0 equiv of *tert*-butyl acrylate ). Colorless oil  
 $R_f = 0.65$  (100%  $\text{CH}_2\text{Cl}_2$ ). Purified via column chromatography (7:3 hex: $\text{CH}_2\text{Cl}_2$  to 2:8  
hex: $\text{CH}_2\text{Cl}_2$ ).

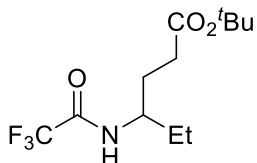

**$^1\text{H}$  NMR** ( $\text{CDCl}_3$ , 400 MHz)  $\delta$  6.61 (brs, 1H), 3.86 (ddd,  $J = 14.7, 8.5, 4.7$  Hz, 1H), 1.42-2.34 (m, 1H), 2.29-2.21 (m, 1H), 1.91-1.72 (m, 2H), 1.66-1.51 (m, 2H), 1.44 (s, 9H), 0.93 (t,  $J = 7.5$  Hz, 3H);  **$^{13}\text{C}$  NMR** ( $\text{CDCl}_3$ , 101 MHz):  $\delta$  173.42, 157.29 (q,  $J = 36.5$  Hz), 116.08 (q,  $J = 288.0$  Hz), 81.36, 77.36, 52.13, 31.94, 28.15, 27.82, 10.07;  **$^{19}\text{F}$  NMR** ( $\text{CDCl}_3$ , 376 MHz): -75.91; **IR (neat)** 3307.24 (brs), 2972.29 (m), 2927.40 (m), 1704.08 (s), 1551.45 (m), 1457.54 (m), 1368.34 (m), 1255.73 (m), 1209.03 (s), 1156.05 (s), 908.79 (s), 845.05 (m), 732.80 (s), 648.87 (m)  $\text{cm}^{-1}$ ;

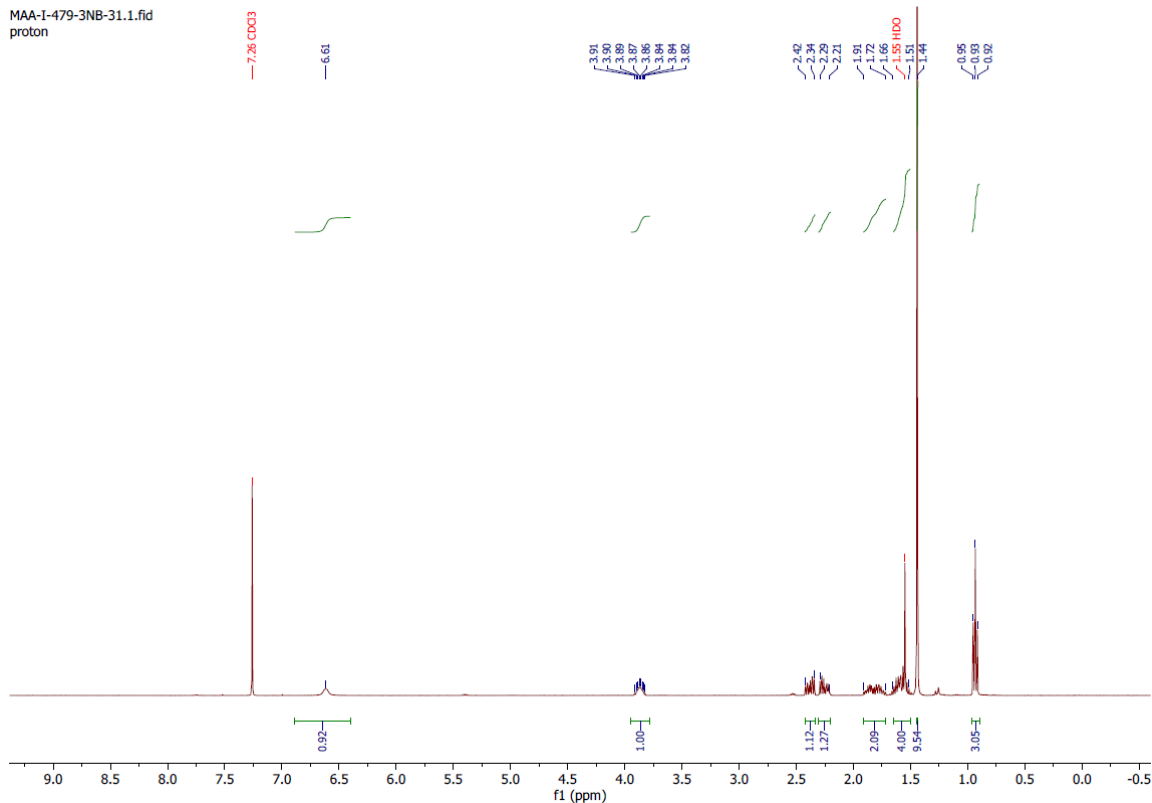

MAA-I-479-3NB-31.3.fid

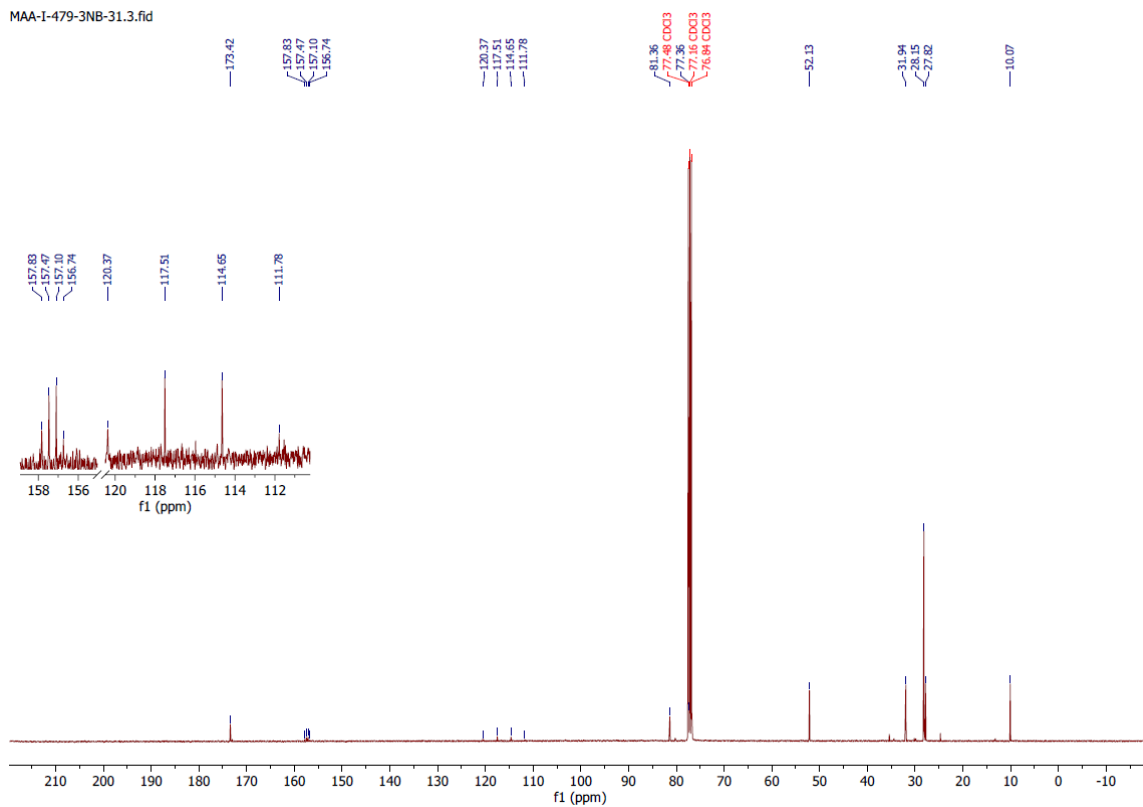

MAA-I-479-3NB-3941.3.fid  
F19

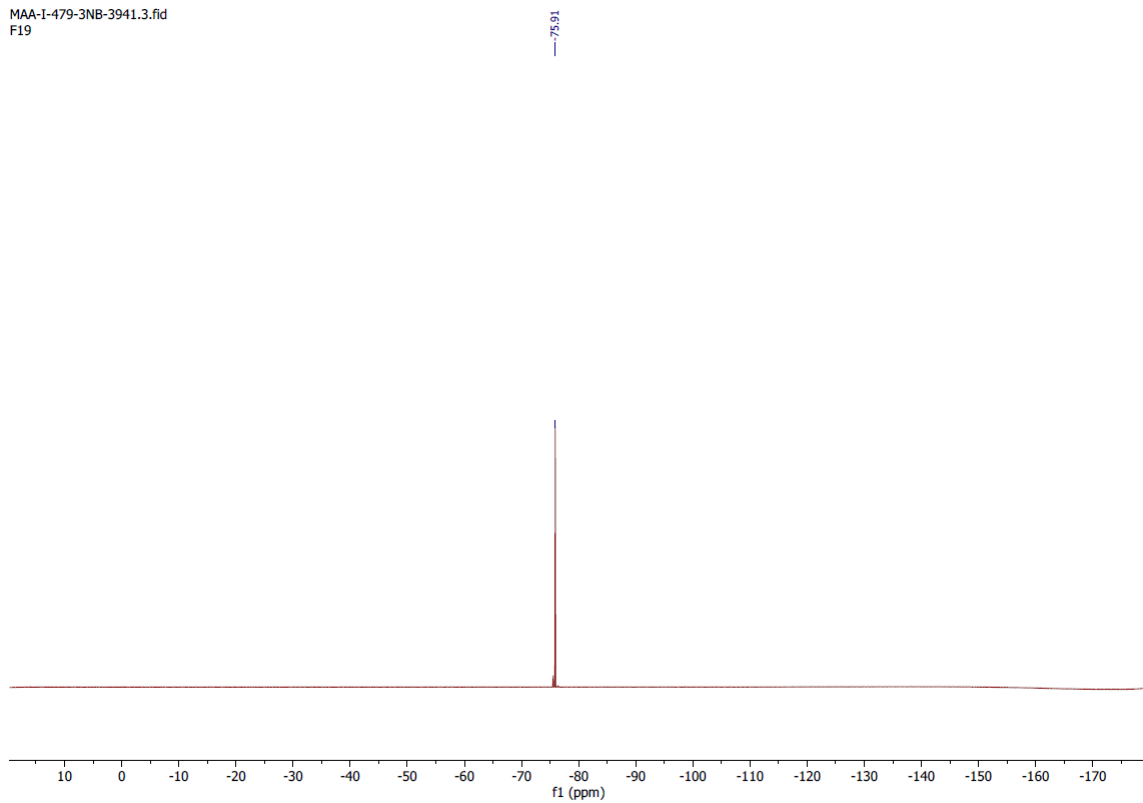

---

## 6.0 Computational Details

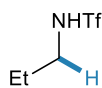

1,1,1-trifluoro-*N*-propylmethanesulfonamide

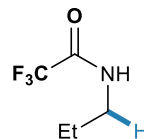

2,2,2-trifluoro-*N*-propylacetamide

DFT calculations<sup>3</sup> were performed using Jaguar, version 9.4<sup>4</sup>, program and the results were produced with Maestro<sup>5</sup>. 1,1,1-trifluoro-*N*-propylmethanesulfonamide and 2,2,2-trifluoro-*N*-propylacetamide (and their corresponding  $\alpha$ -radical species) were optimized using B3LYP/6-311+G\*\*<sup>6,7</sup>. Frequency calculations at the same level of theory were performed. Single point energies were determined using B3LYP/aug-ccPVTZ(-f). Bond dissociation energies for the  $\alpha$ -C-H bond were determined by calculating the difference in energies between the optimized starting substrates and their radical energies plus hydrogen atom energies. All computations were completed in the gas phase.

$$BDE = [E(\text{radical}) + E(\text{H})] - E(\text{molecule})$$

---

<sup>3</sup> Kohn, W.; Sham, L. J. *Phys. Rev. A* 1965, 140, A1133-S1138.

<sup>4</sup> (a) Jaguar, version 9.4, Schrodinger, Inc., New York, NY, 2016. (b) Bochevarov, A.D.; Harder, E.; Hughes, T.F.; Greenwood, J.R.; Braden, D.A.; Philipp, D.M.; Rinaldo, D.; Halls, M.D.; Zhang, J.; Friesner, R.A., "Jaguar: A high-performance quantum chemistry software program with strengths in life and materials sciences," *Int. J. Quantum Chem.*, 2013, 113(18), 2110-2142.

<sup>5</sup> Schrodinger Release 2016-4: Maestro, Schrodinger, LLC, New York, NY, 2017.

<sup>6</sup> (a) Stephens, P. J.; Devlin, F. J.; Chabalowski, C. F.; Frisch, M. J. *J. Phys. Chem.* 1994, 98, 11623- 11267. (b) Becke, A. D. *J. Chem. Phys.* 1993, 98, 5648-5652. (c) Becke, A. D. *J. Chem. Phys.* 1993, 98, 1372-1377. (d) Lee, C.; Yang, W.; Parr, R. G. *Phys. Rev. B* 1988, 37, 785-791.

<sup>7</sup> Krishnan, R.; Binkley, J. S.; Seeger, R.; Pople, J. A. *J. Chem. Phys.* 1980, 72, 650-654.

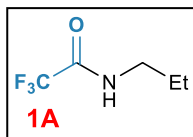

$E_{\text{tot\_ZPE\_corrected}}$

1A = -392176.5 kcal/mol

1A $_{\alpha\text{-rad}}$  = -391774.2 kcal/mol

H $_{\text{atom}}$  = -315.108 kcal/mol

$\alpha\text{-C-H BDE}$ : 87 kcal/mol

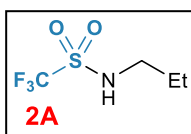

$E_{\text{tot\_ZPE\_corrected}}$

2A = -665317.8 kcal/mol

2A $_{\alpha\text{-rad}}$  = -664912.2 kcal/mol

H $_{\text{atom}}$  = -315.108 kcal/mol

$\alpha\text{-C-H BDE}$ : 91 kcal/mol

# NMR spectra

## 1,1,1-trifluoro-*N*-propylmethanesulfonamide (1a)

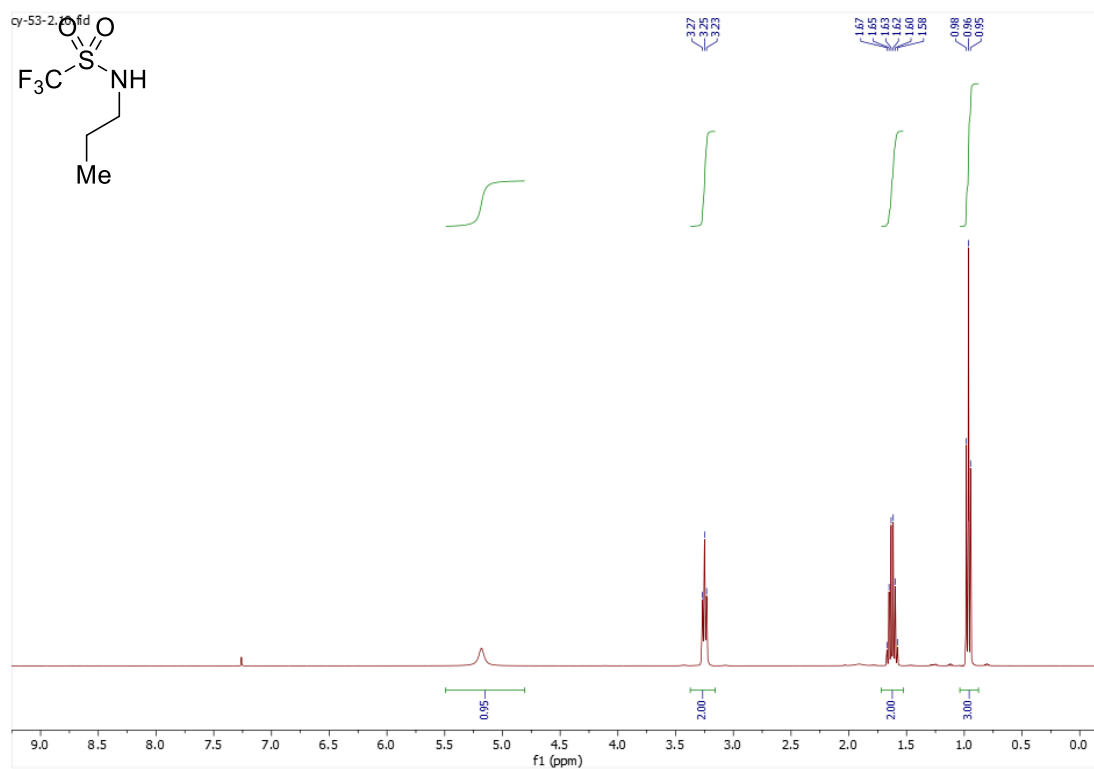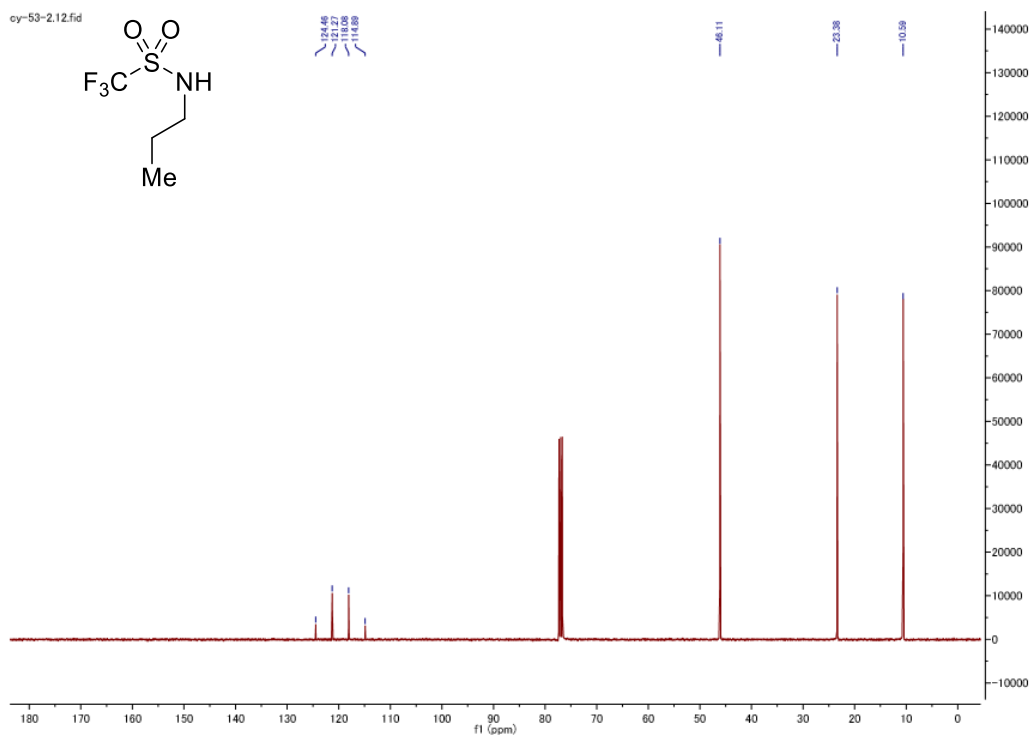

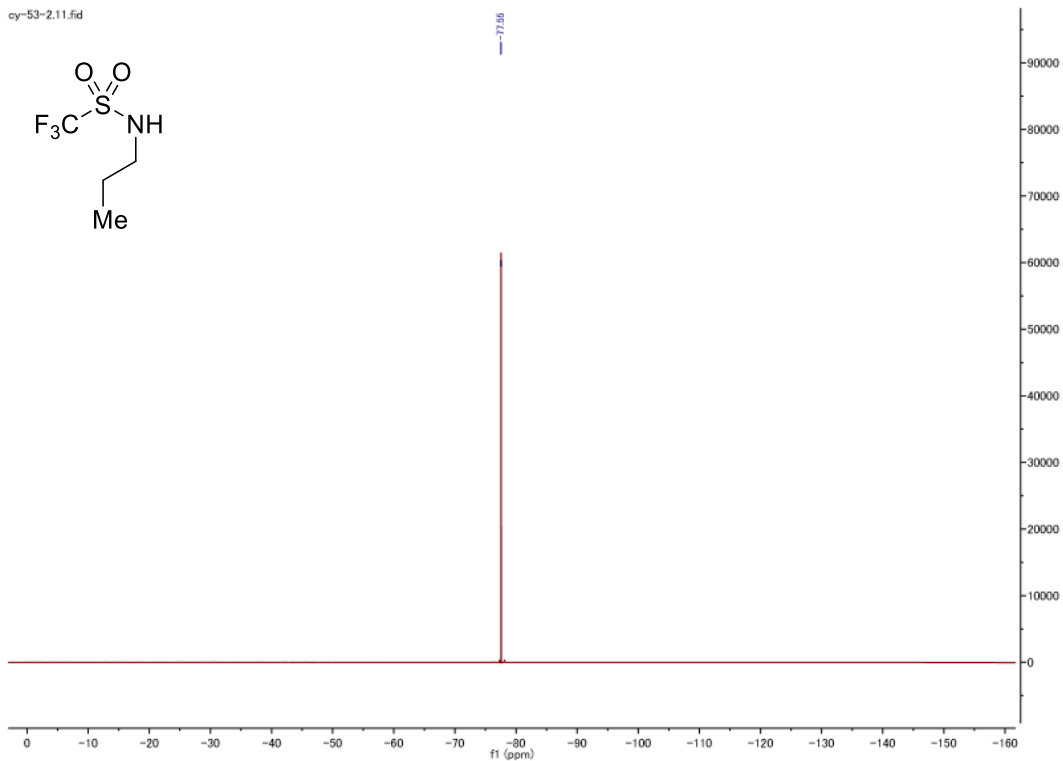

**N-butyl-1,1,1-trifluoromethanesulfonamide (1b)**

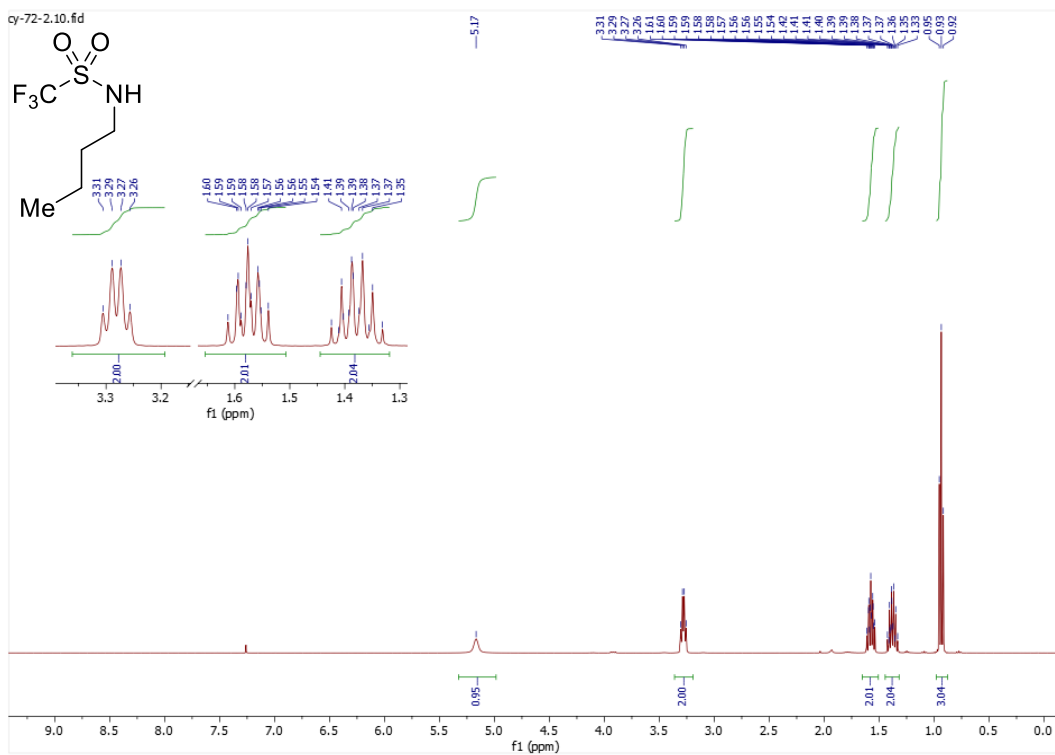



cy-72-2.12.fid

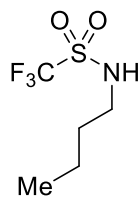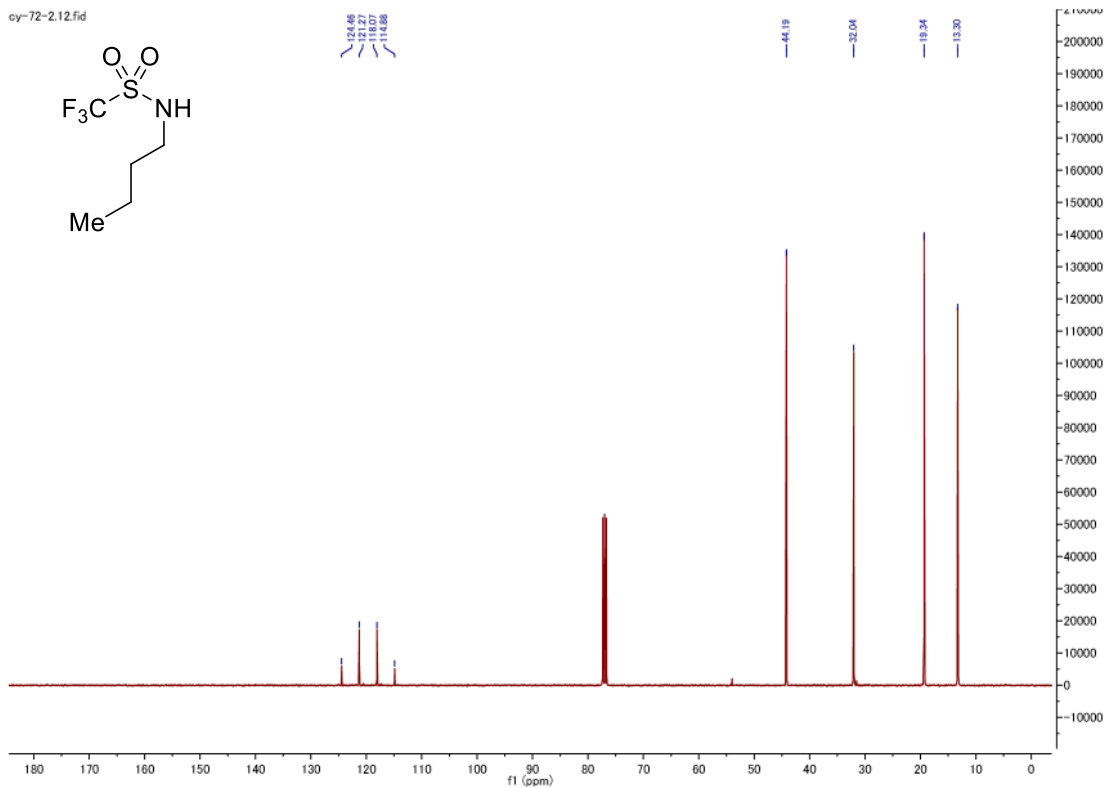

cy-72-2.11.fid

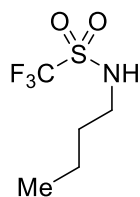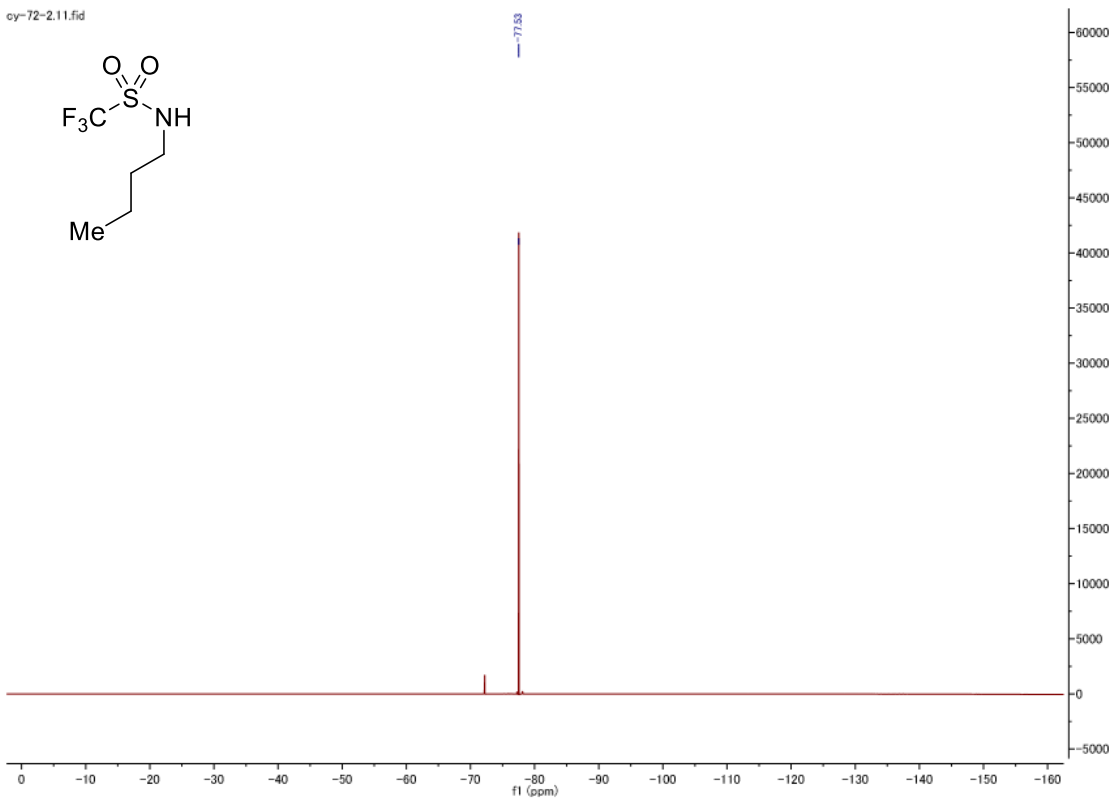

# 1,1,1-trifluoro-N-pentylmethanesulfonamide (1c)

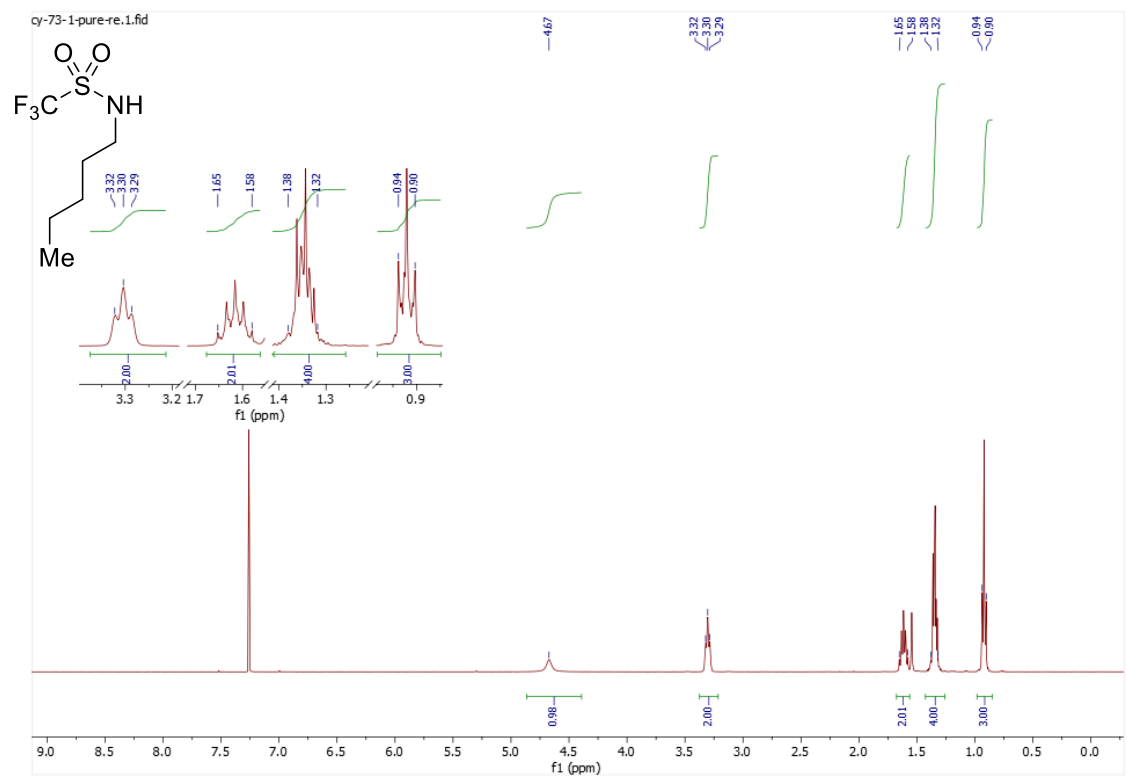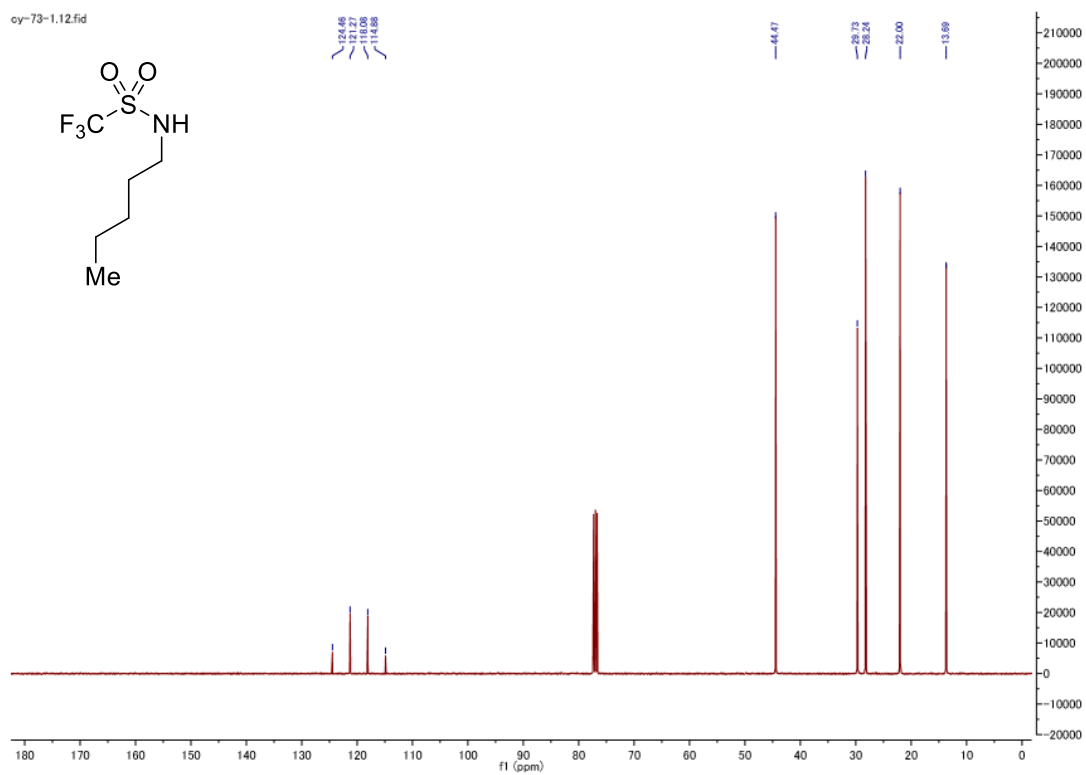

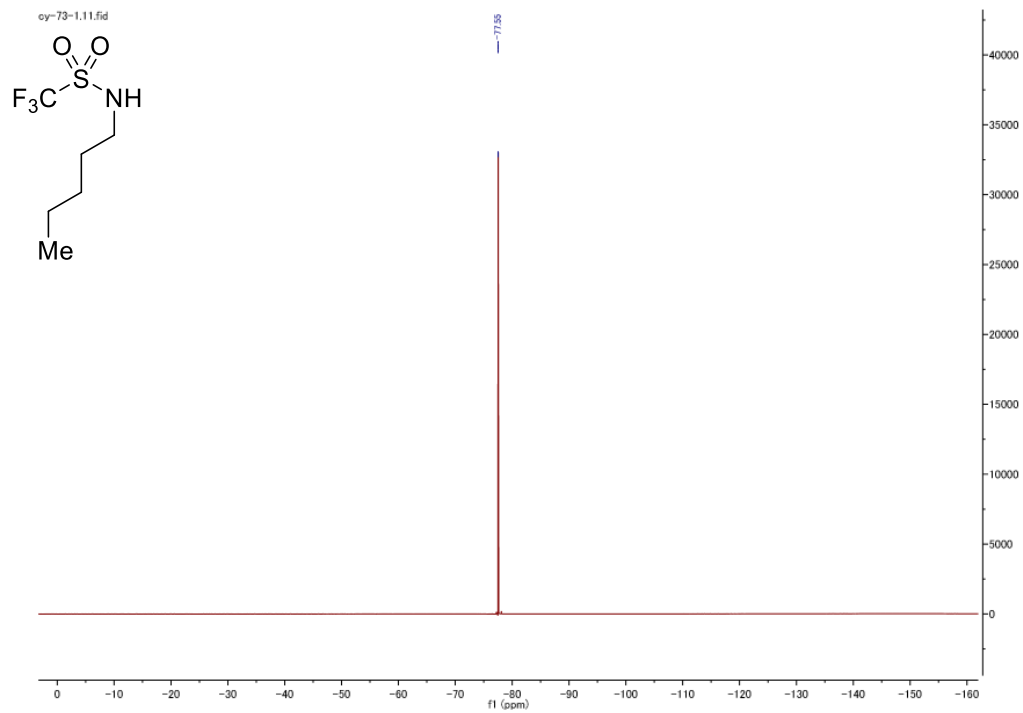

***N*-(cyclohexylmethyl)-1,1,1-trifluoromethanesulfonamide (1d)**

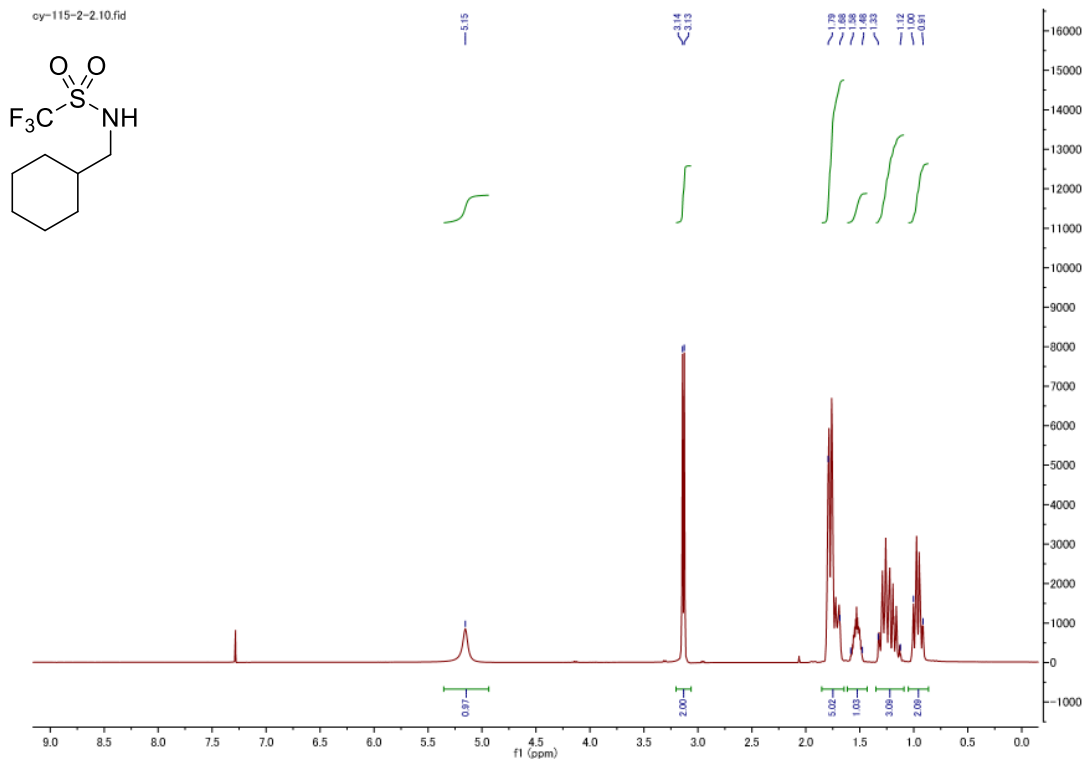

cy-115-2-2.12.fid

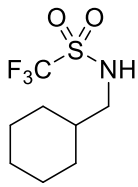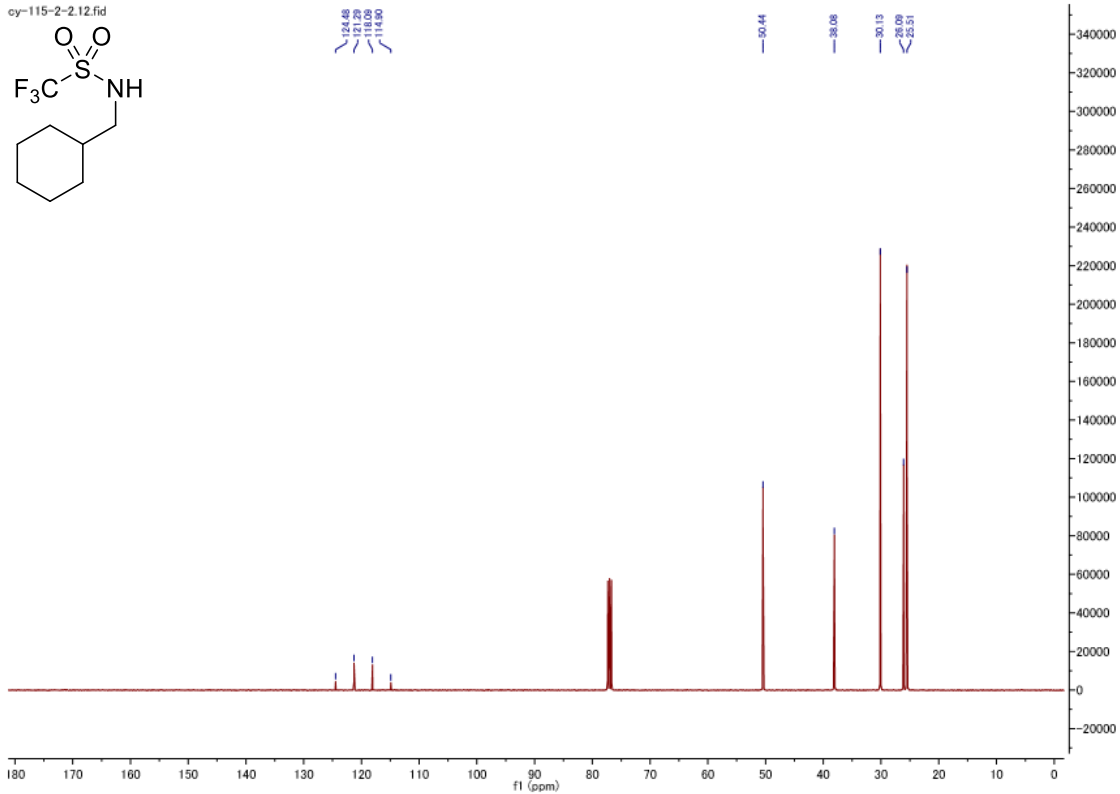

cy-115-2-2.11.fid

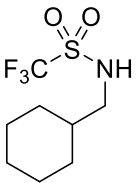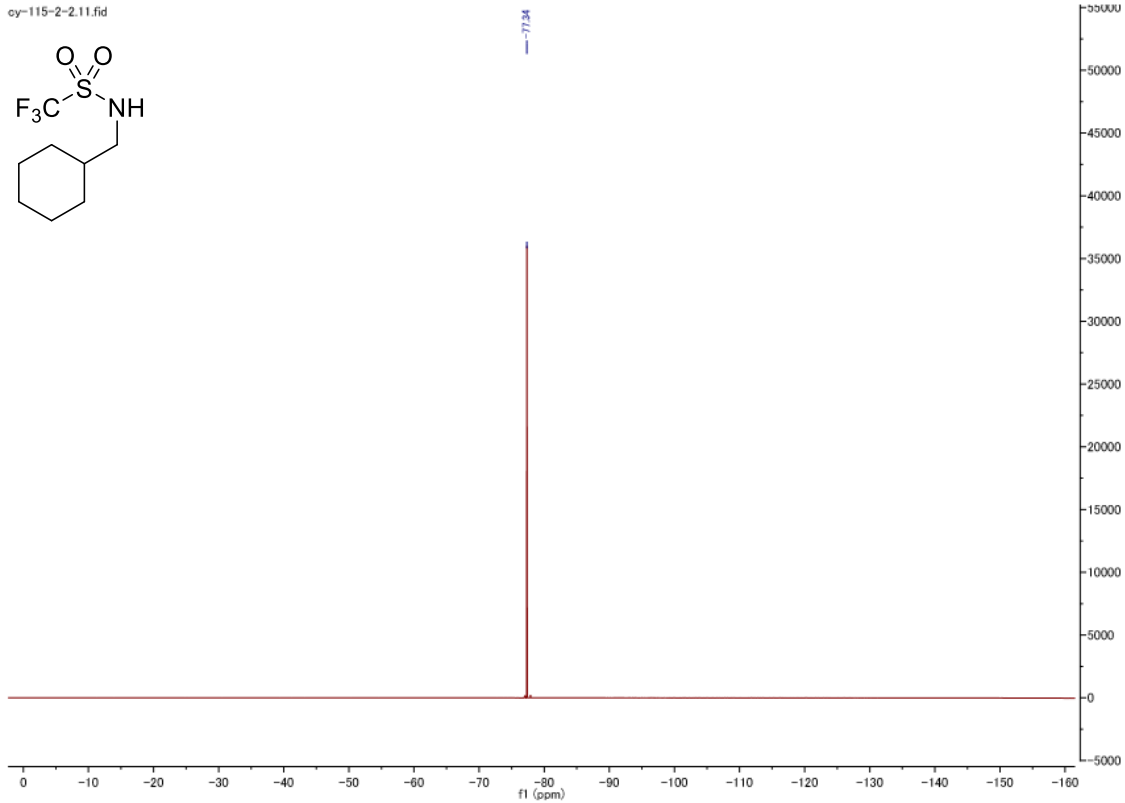

# 1,1,1-trifluoro-*N*-isopropylmethanesulfonamide (1e)

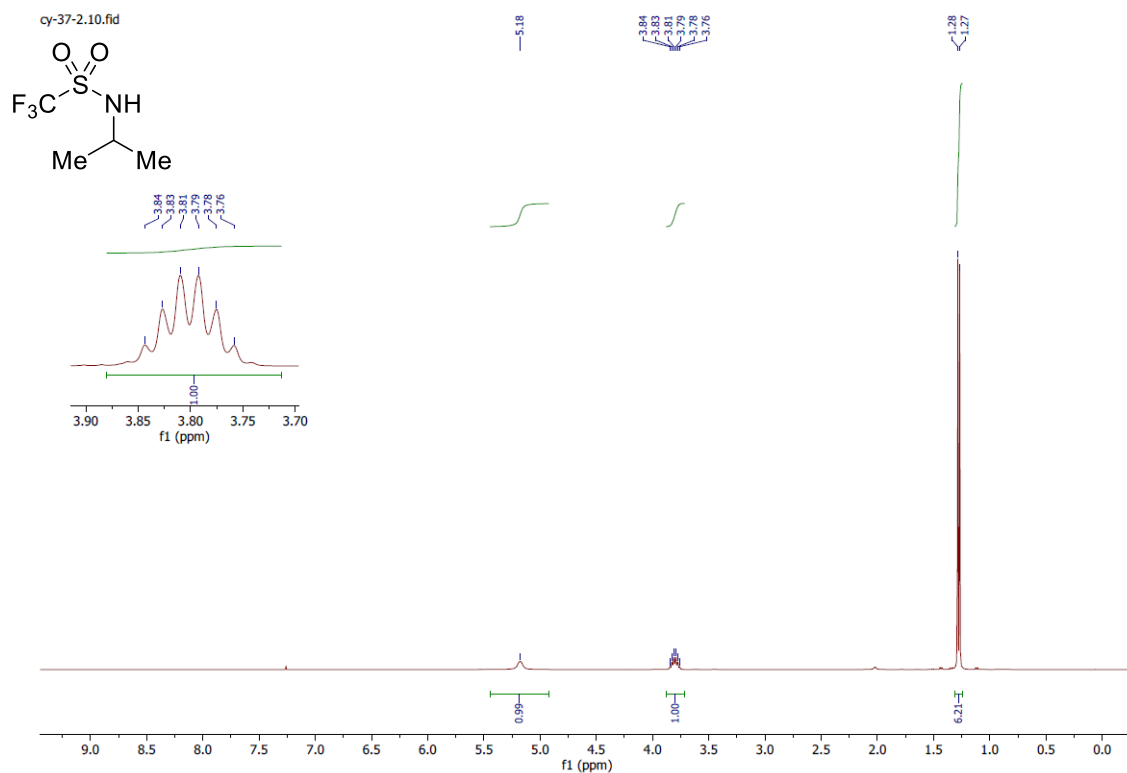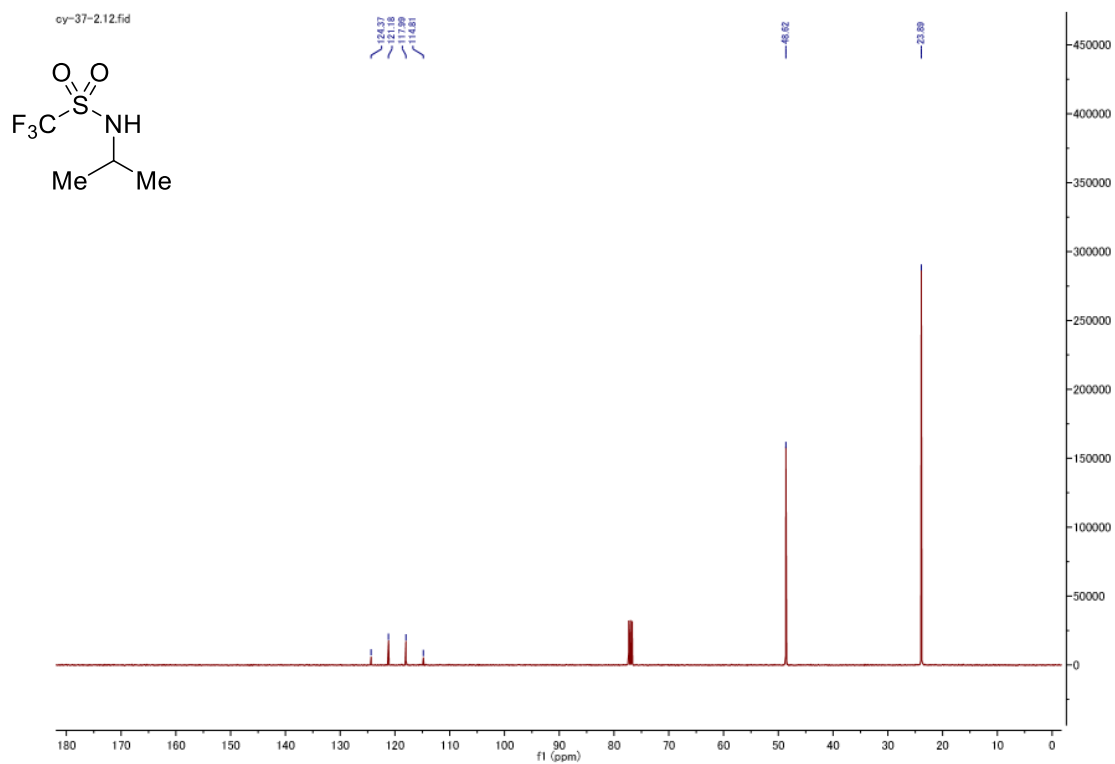

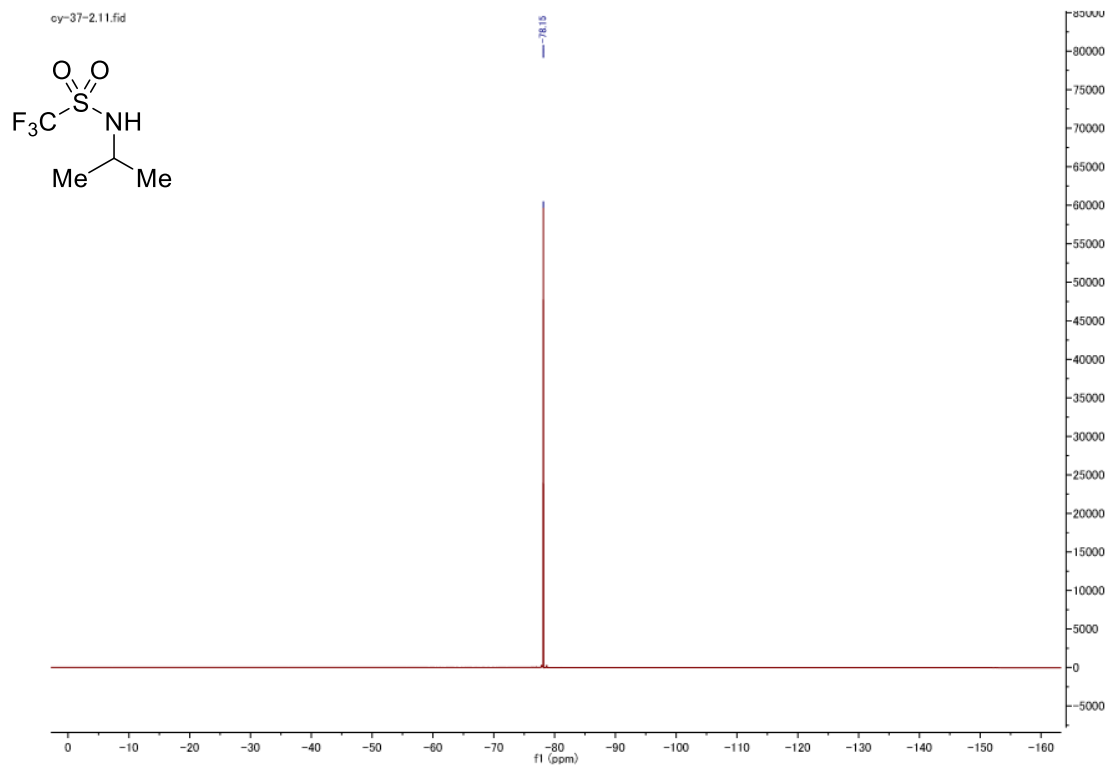

**N-cyclohexyl-1,1,1-trifluoromethanesulfonamide (1f)**

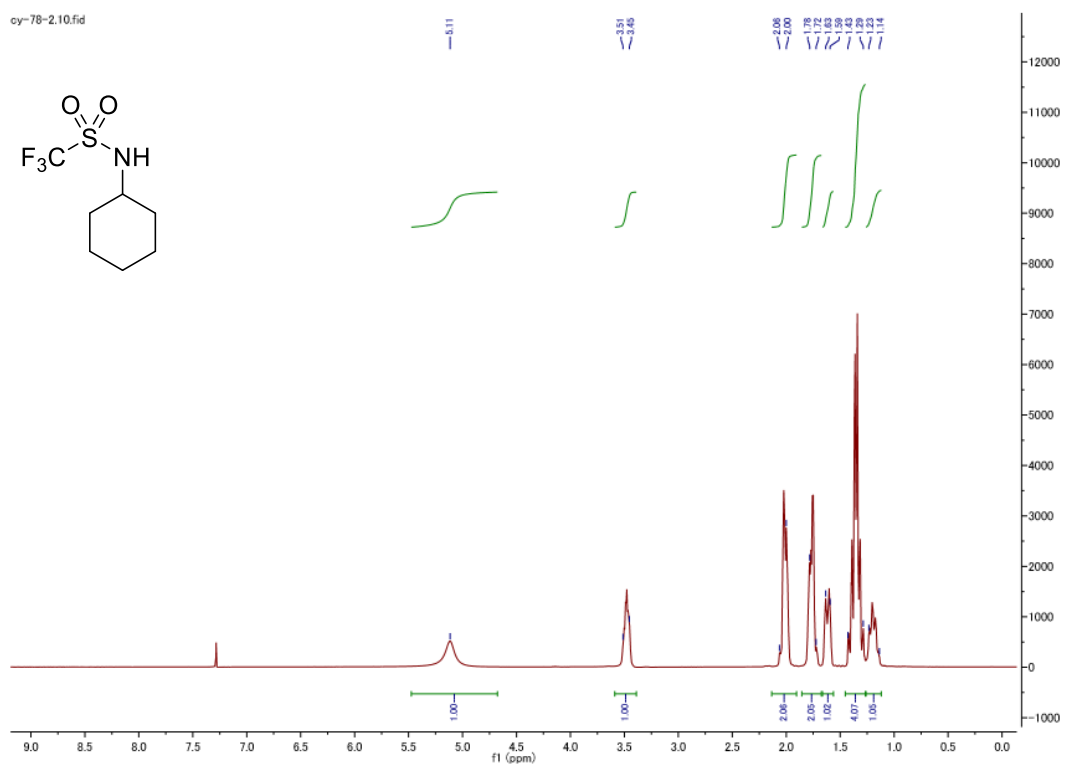

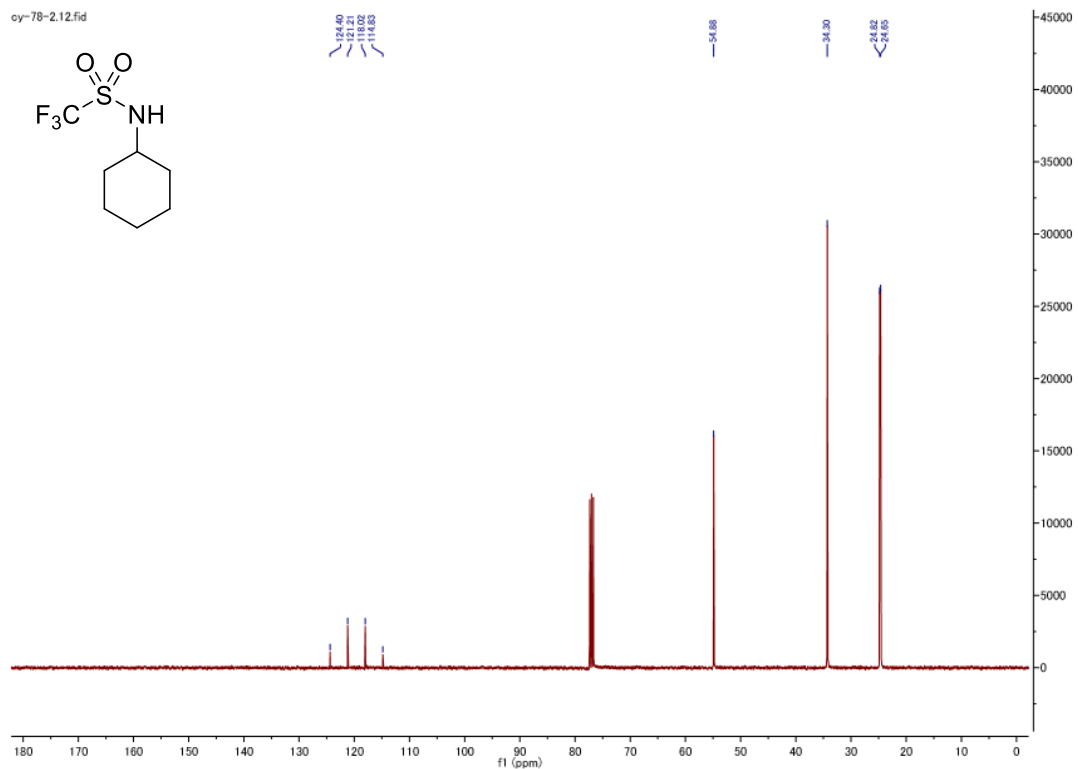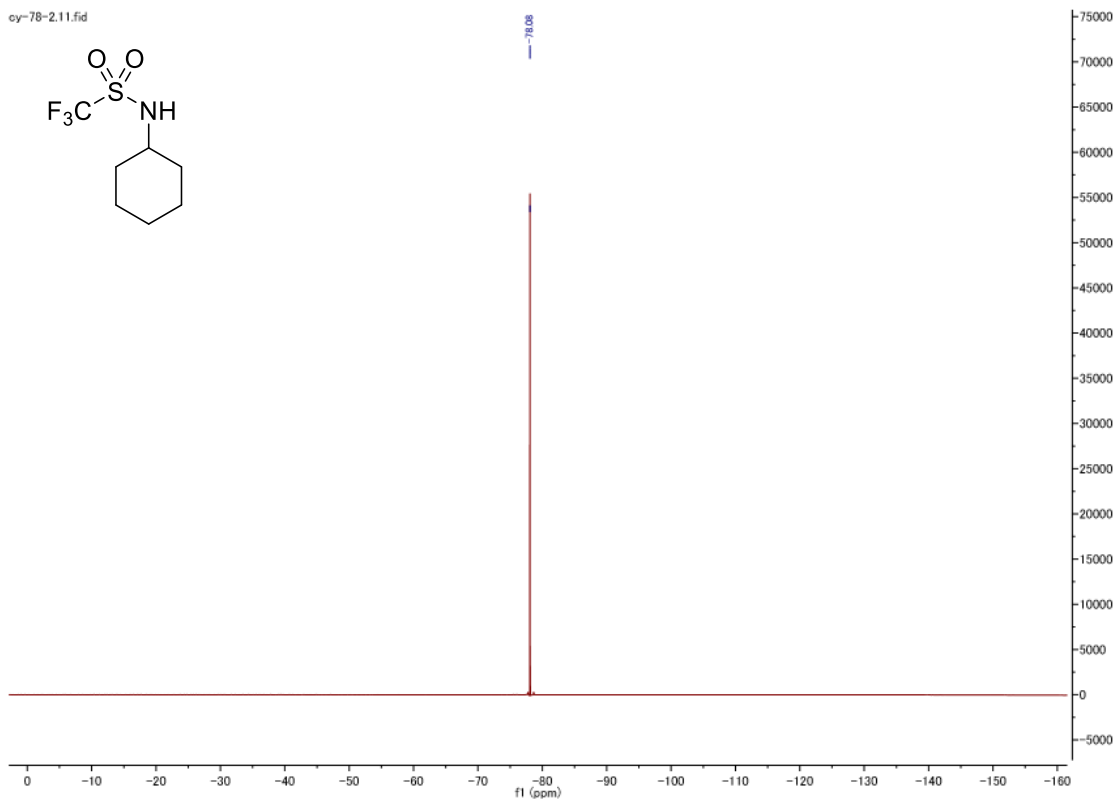

# 1,1,1-trifluoro-*N*-methanesulfonamide (1g)

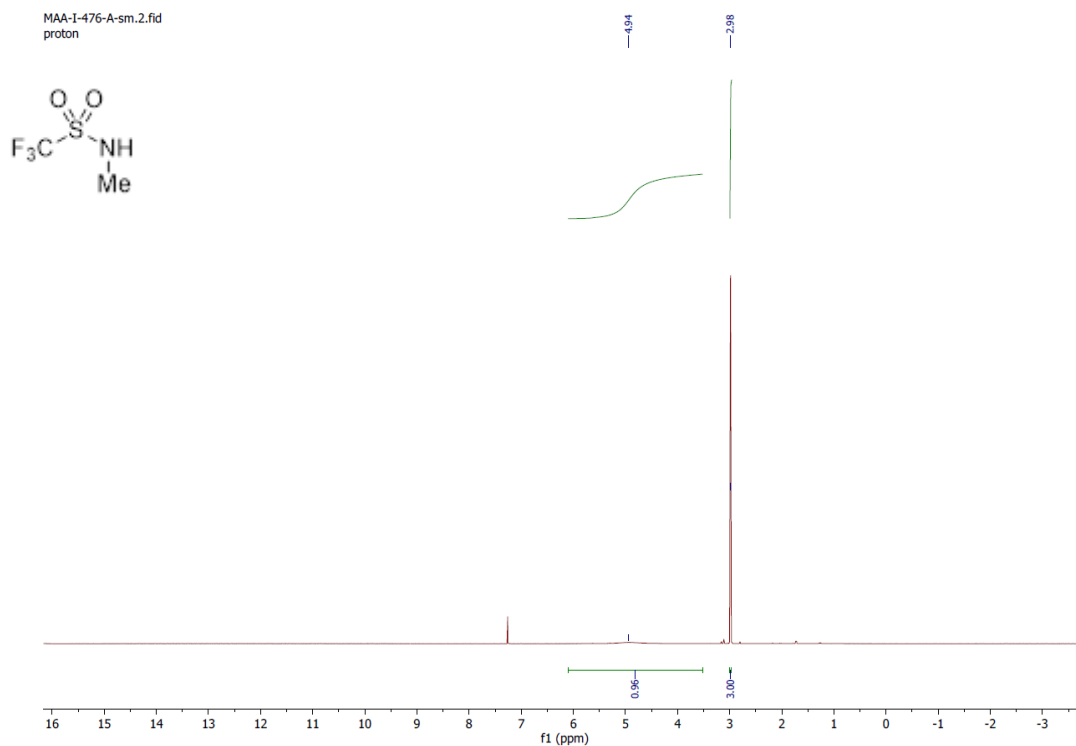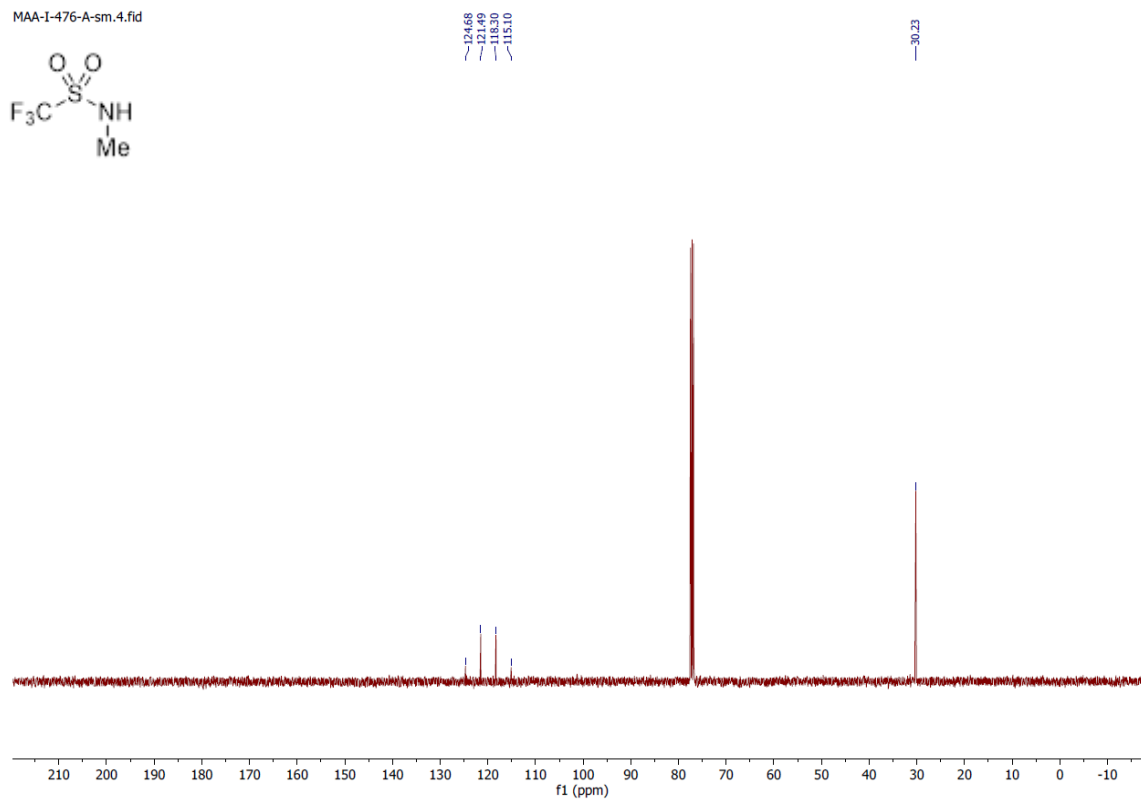



MAA-I-476-A-sm.3.fid  
F19

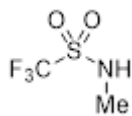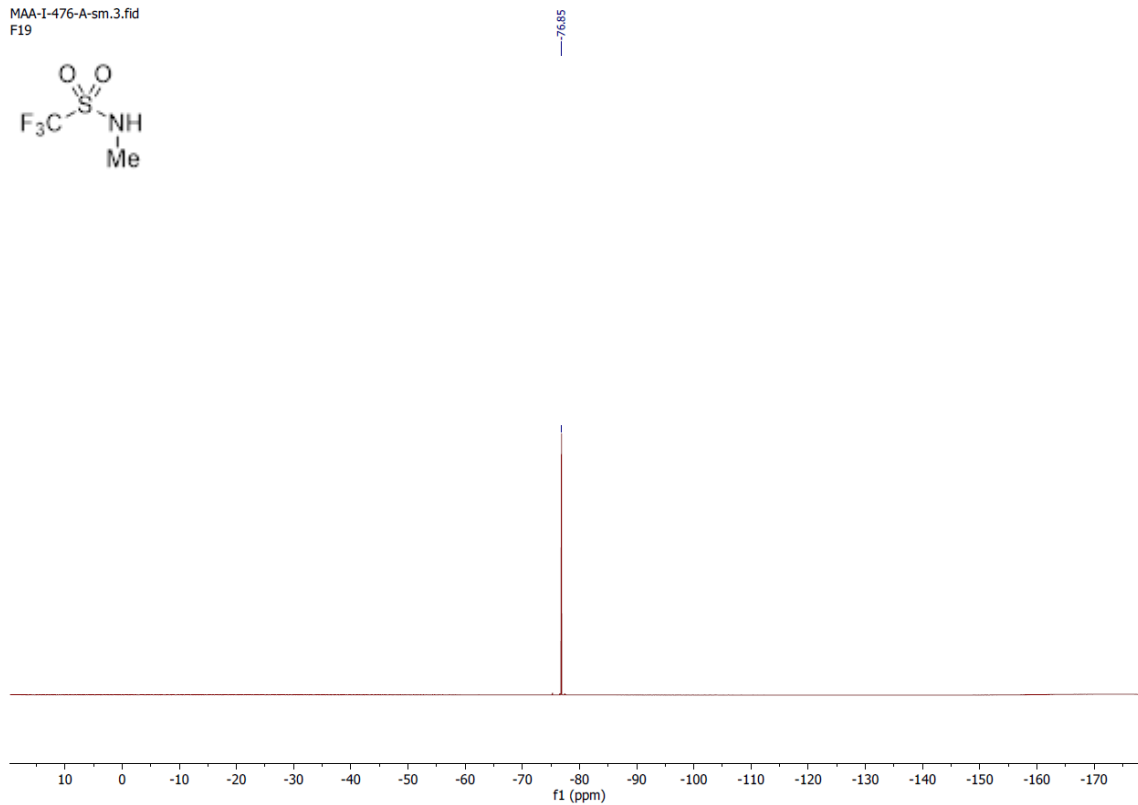

**ethyl 3-((trifluoromethyl)sulfonamido)propanoate (1h)**

cy-100-2.10.fid

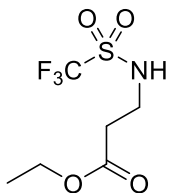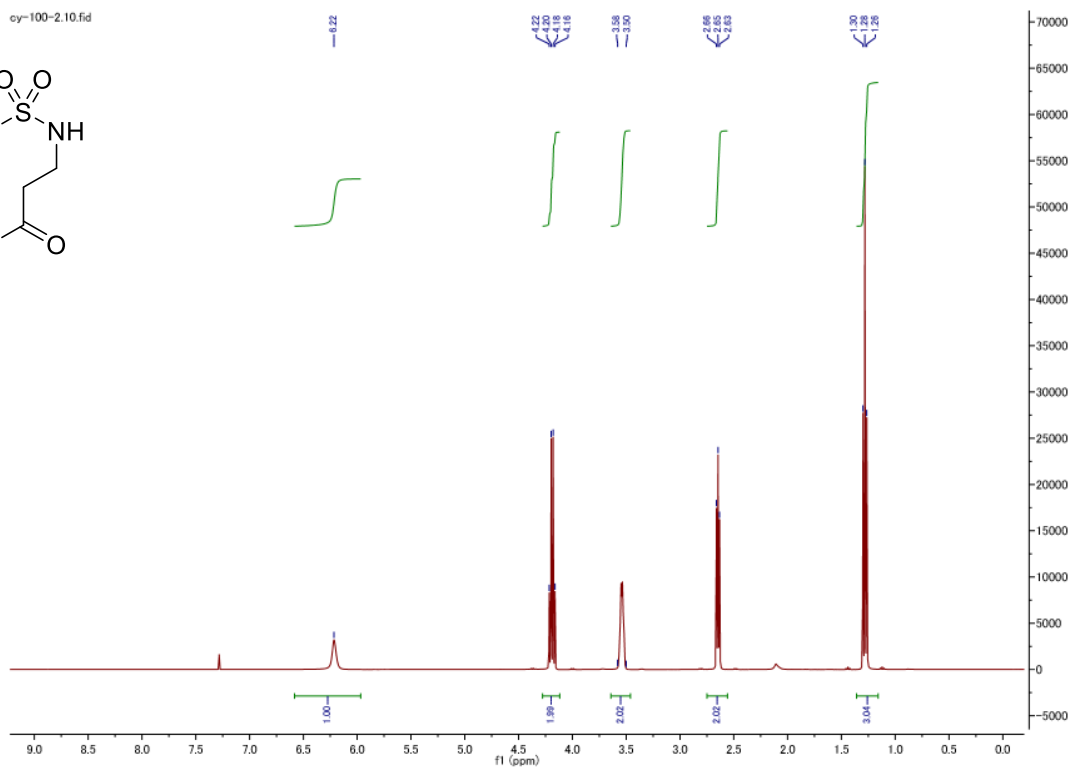

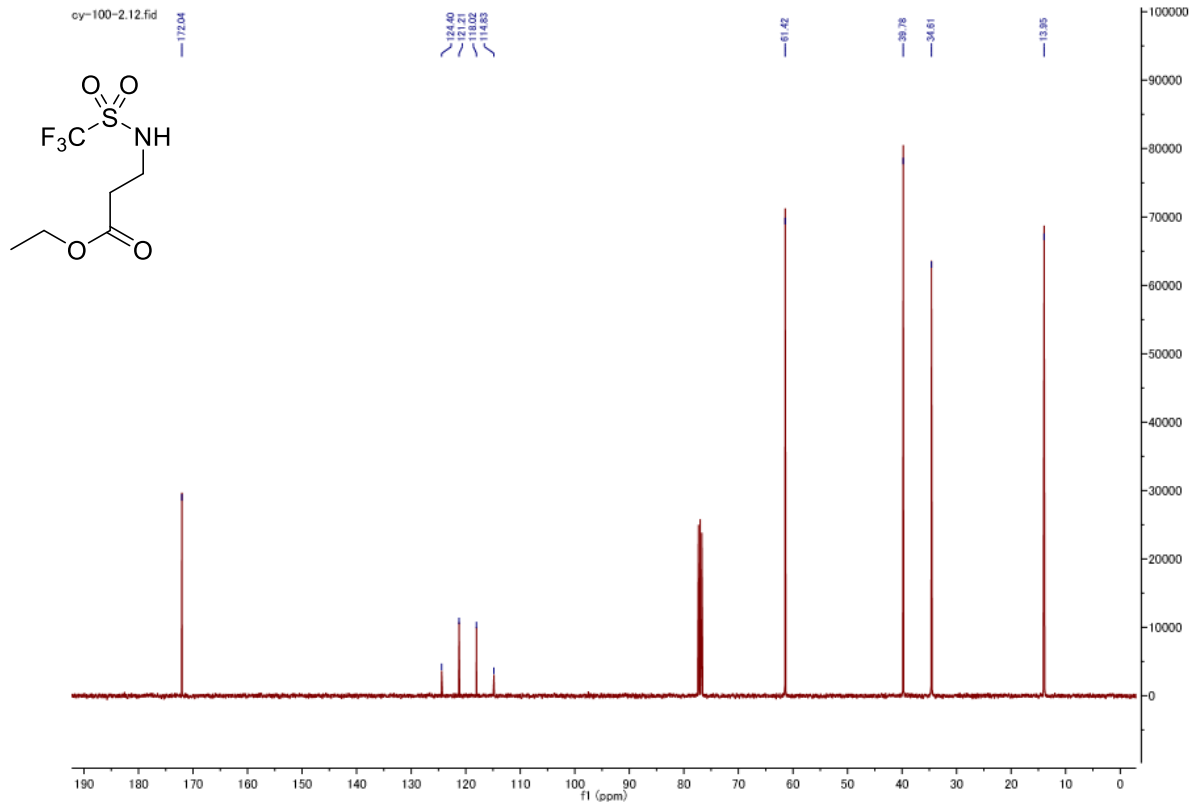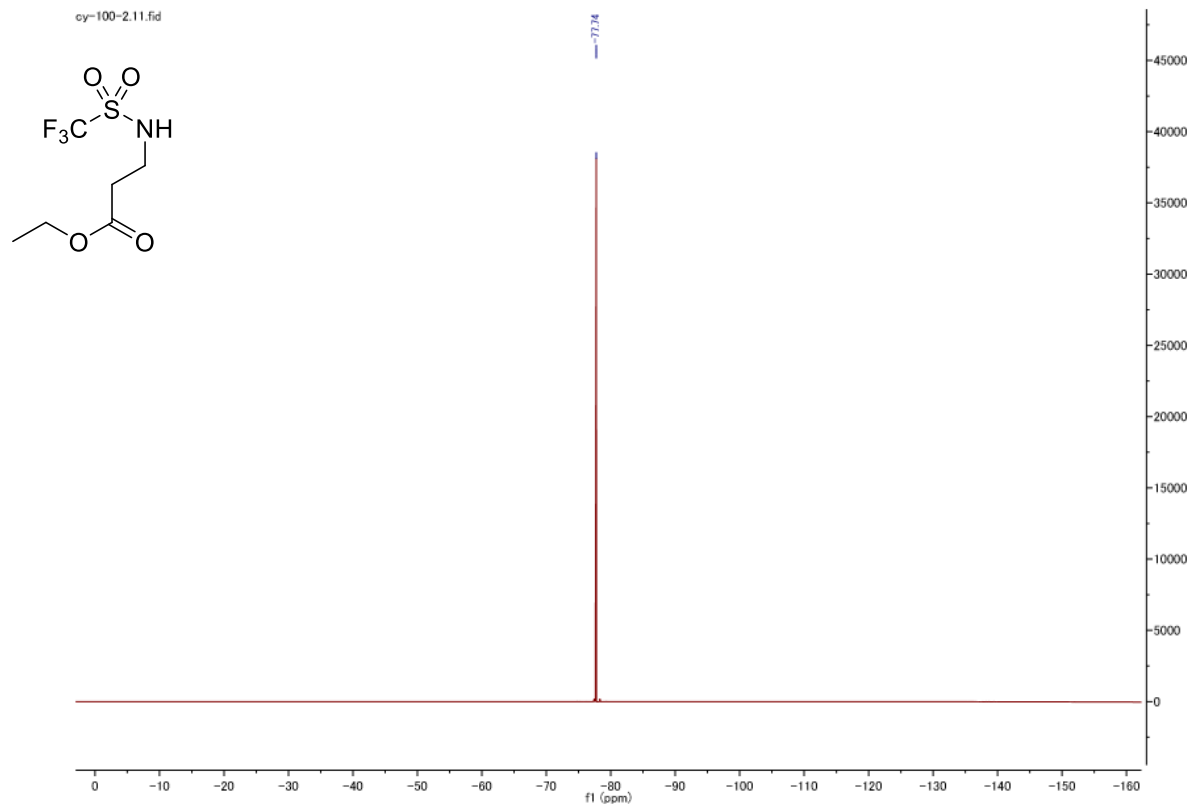

# 1,1,1-trifluoro-N-(2-(pyridin-2-yl)ethyl)methanesulfonamide (1i)

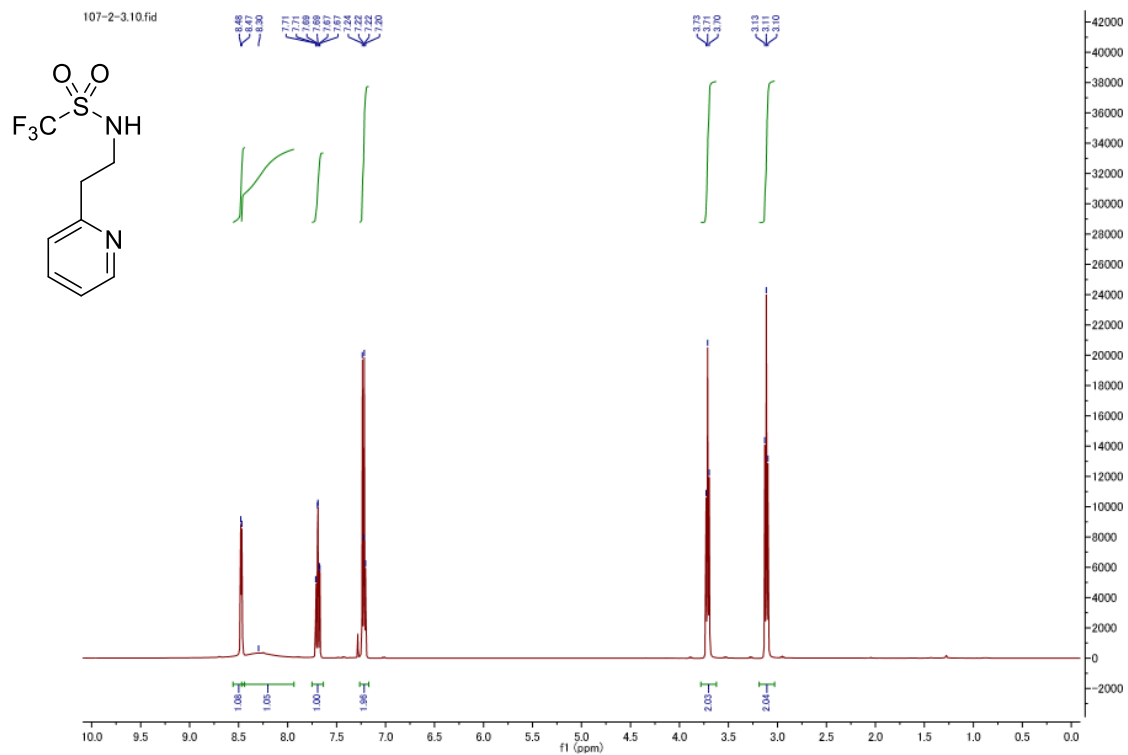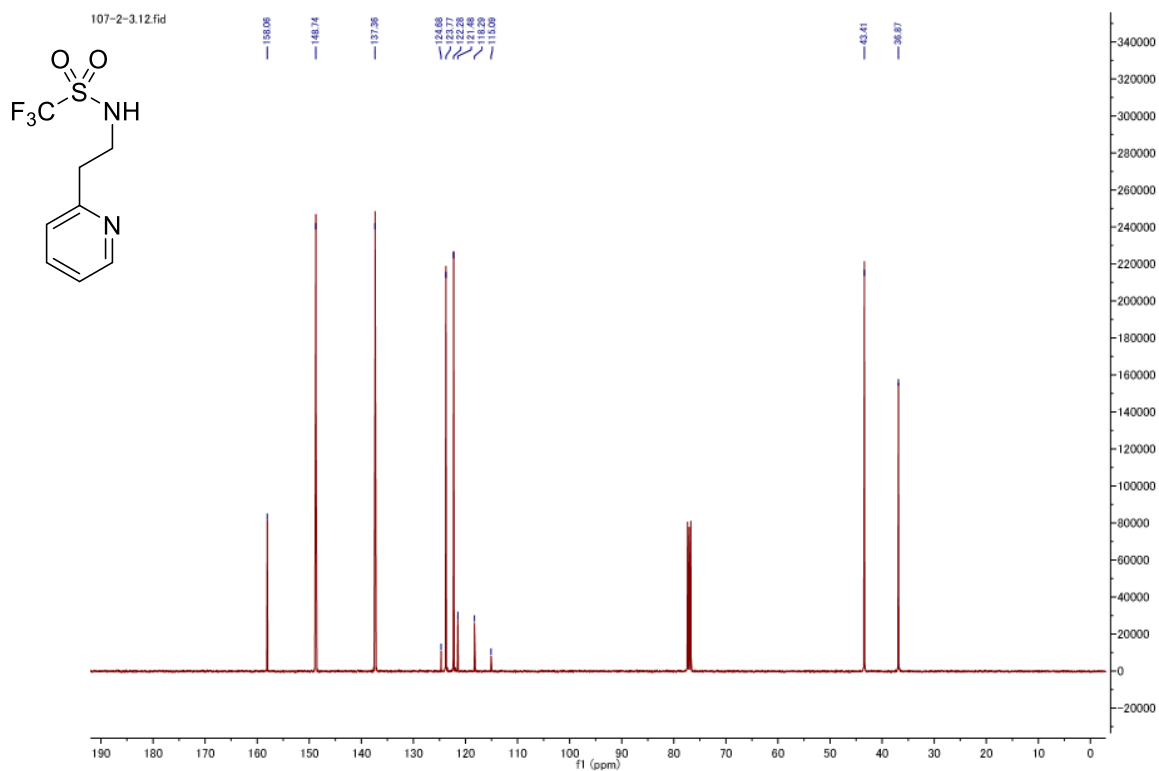

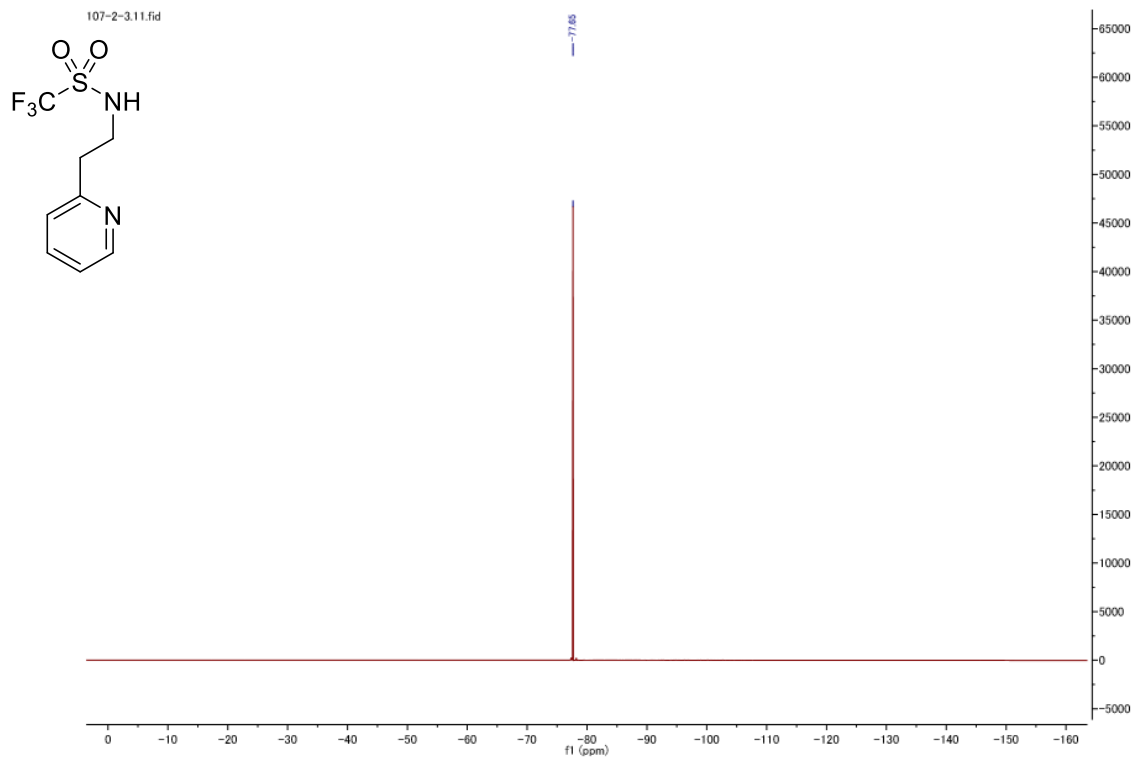

**1,1,1-trifluoro-N-(2-(thiophen-2-yl)ethyl)methanesulfonamide (1j)**

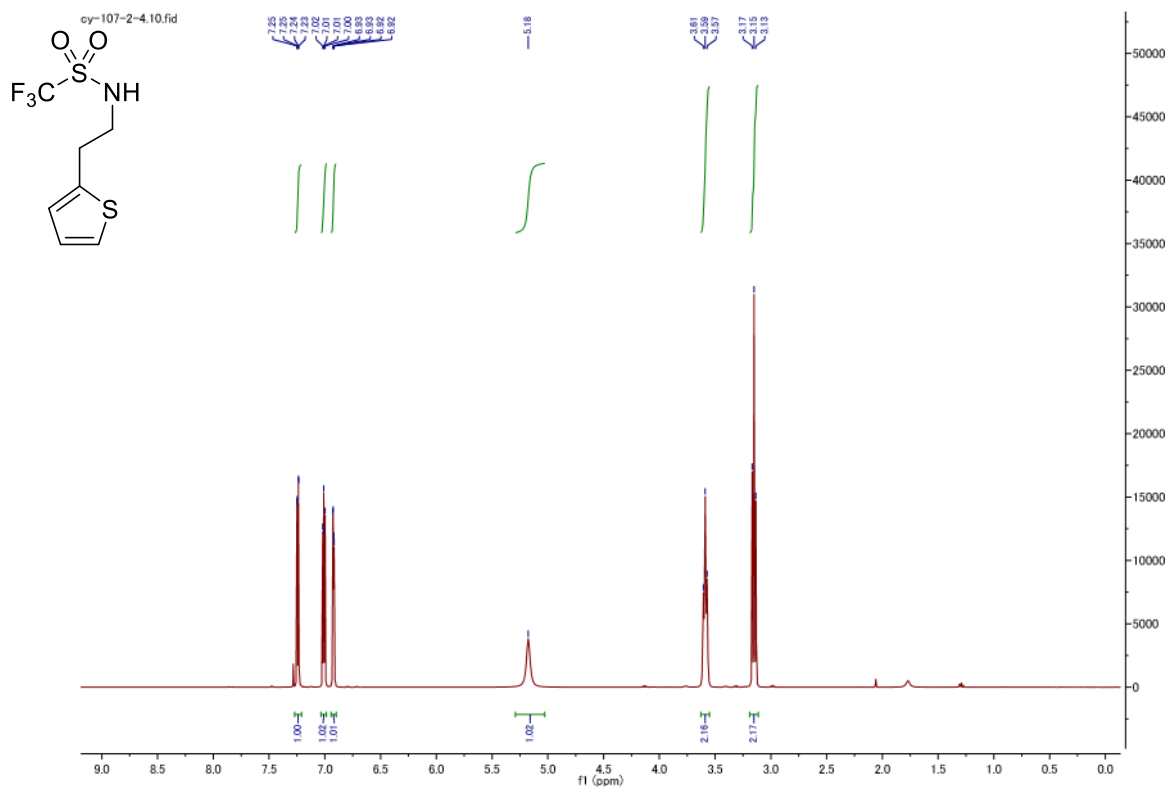

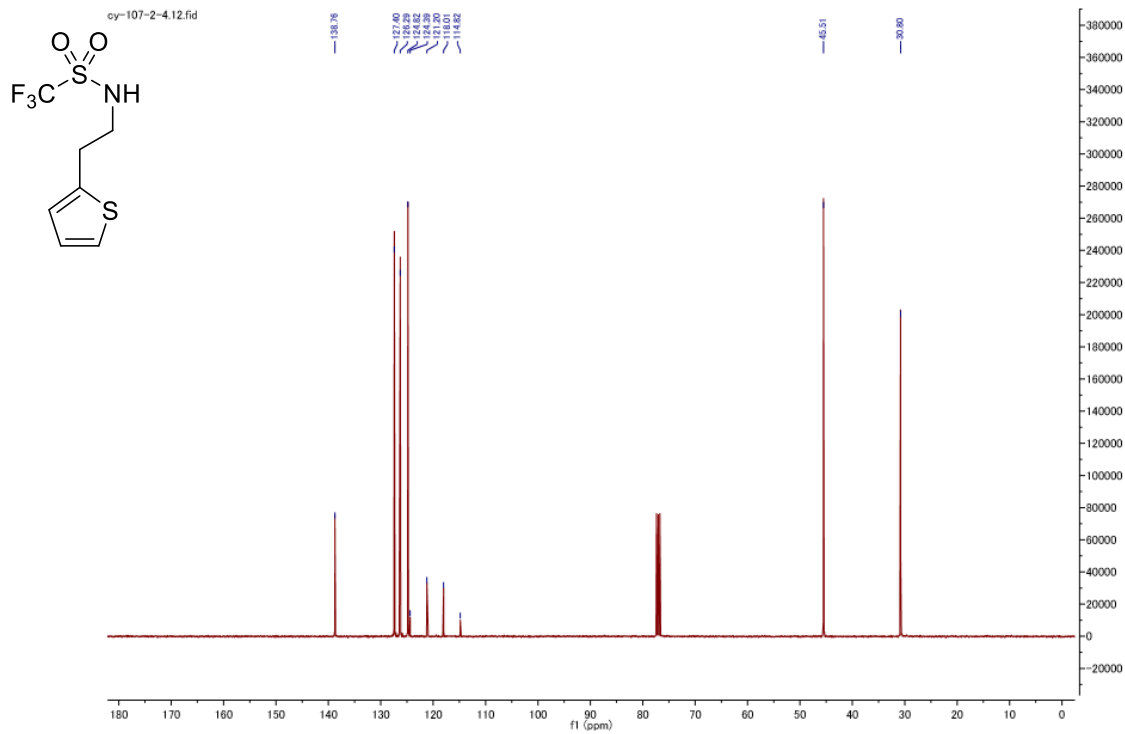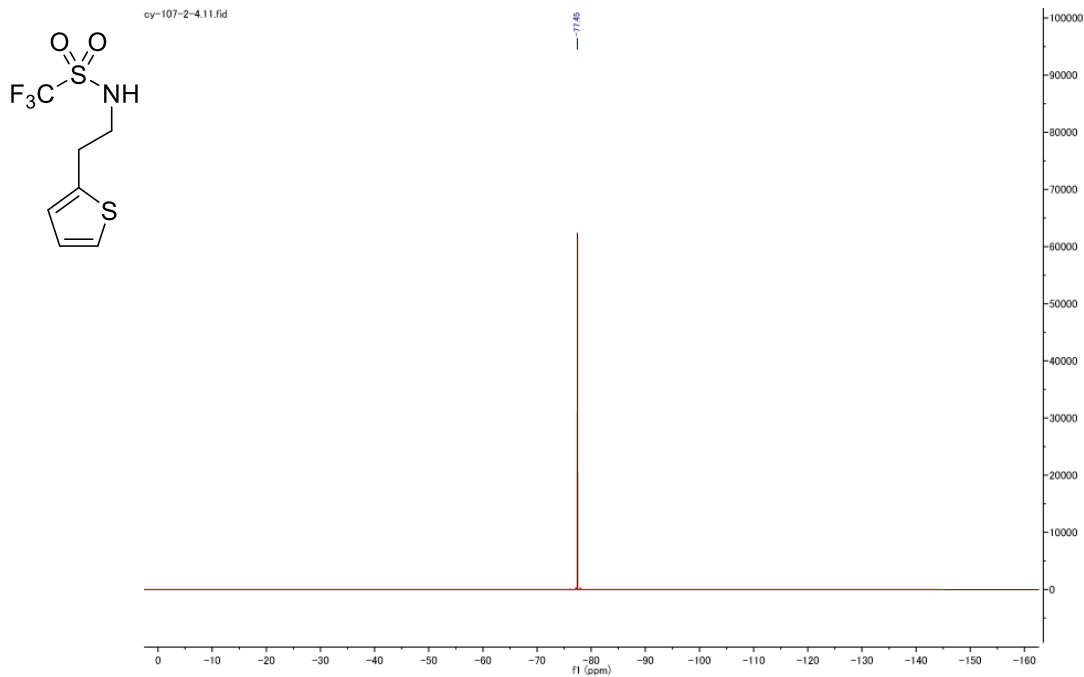

**1,1,1-trifluoro-N-(((2R,3R,4S,5R,6S)-3,4,5,6-tetramethoxytetrahydro-2H-pyran-2-yl)methyl)methanesulfonamide (1k)**

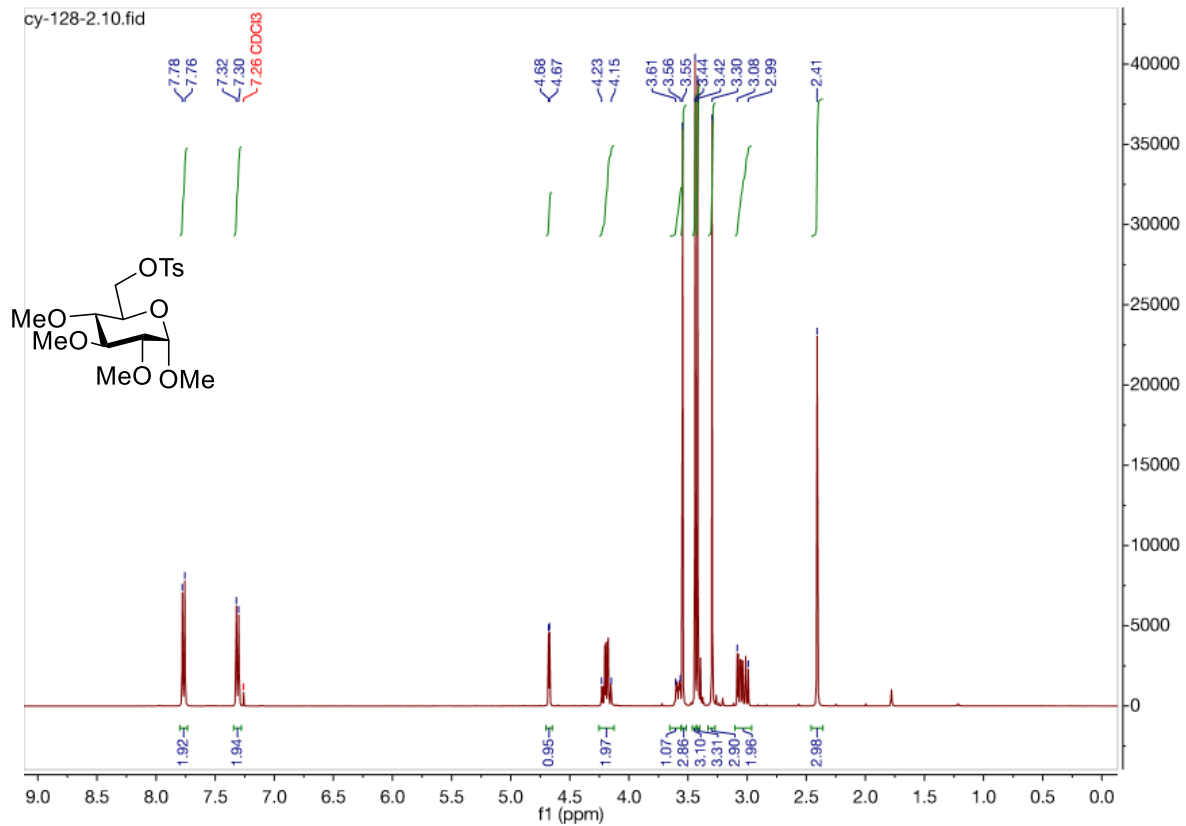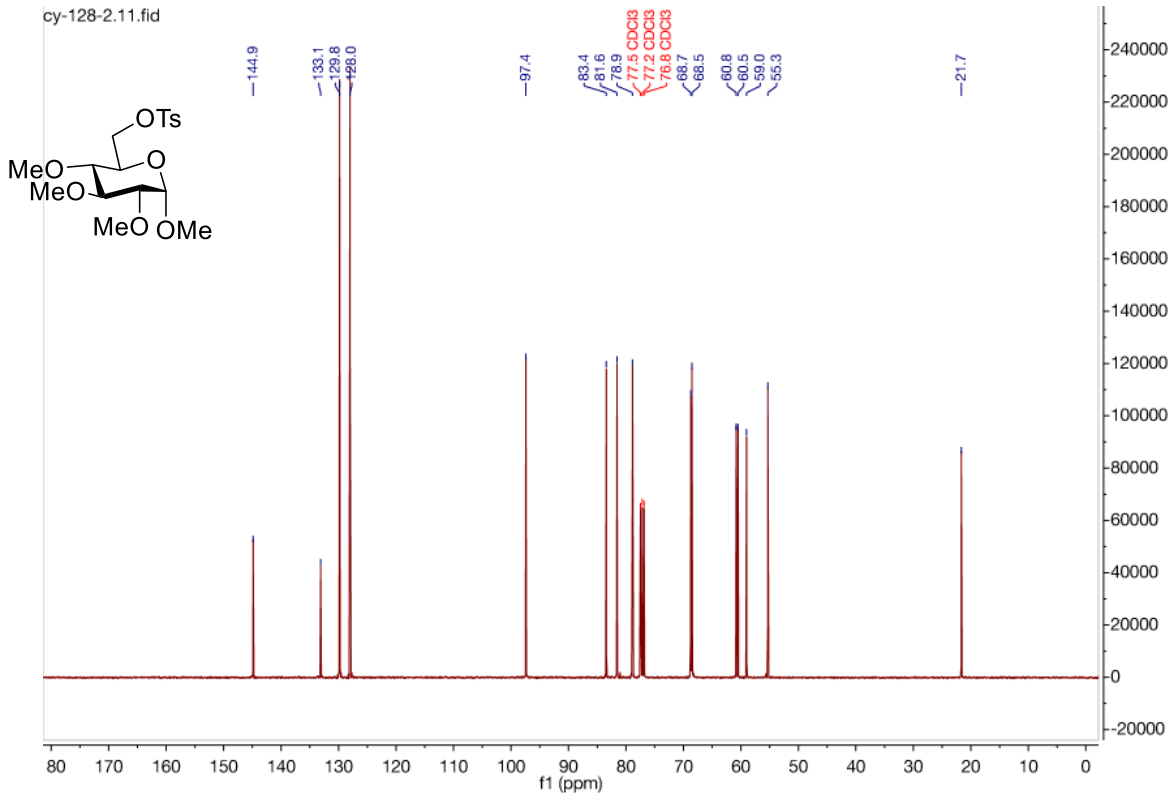

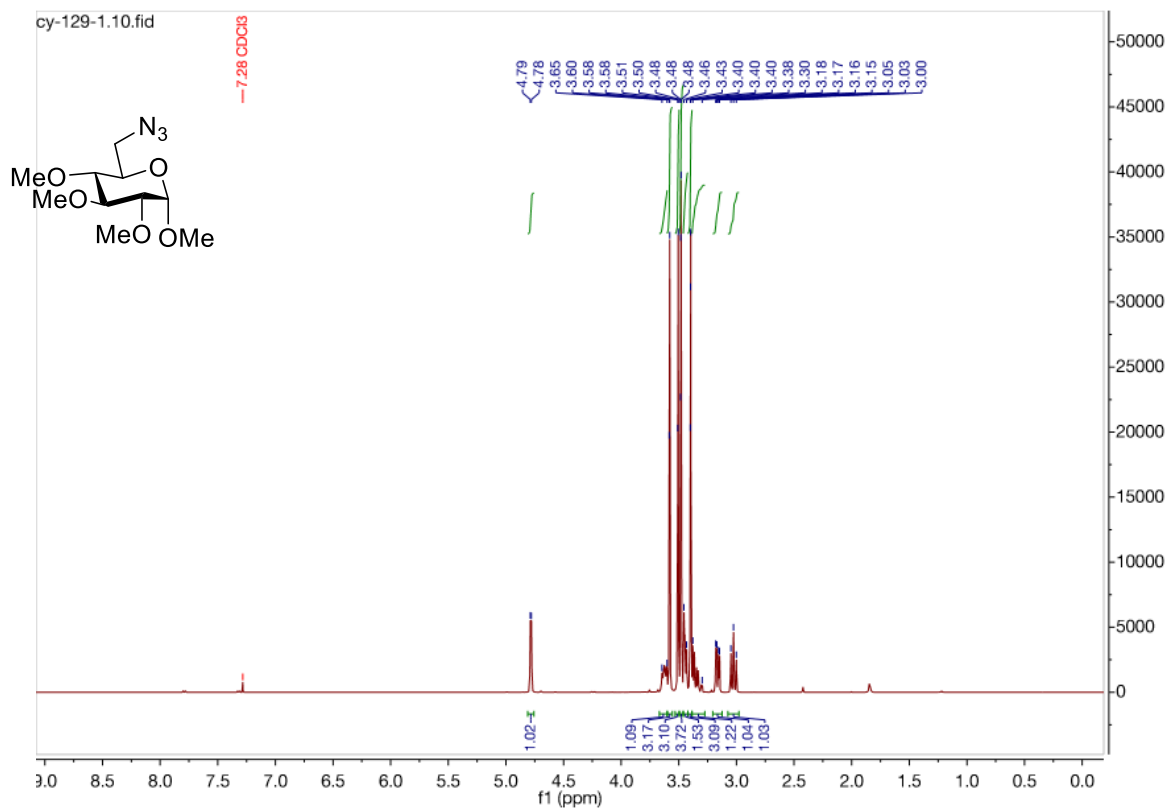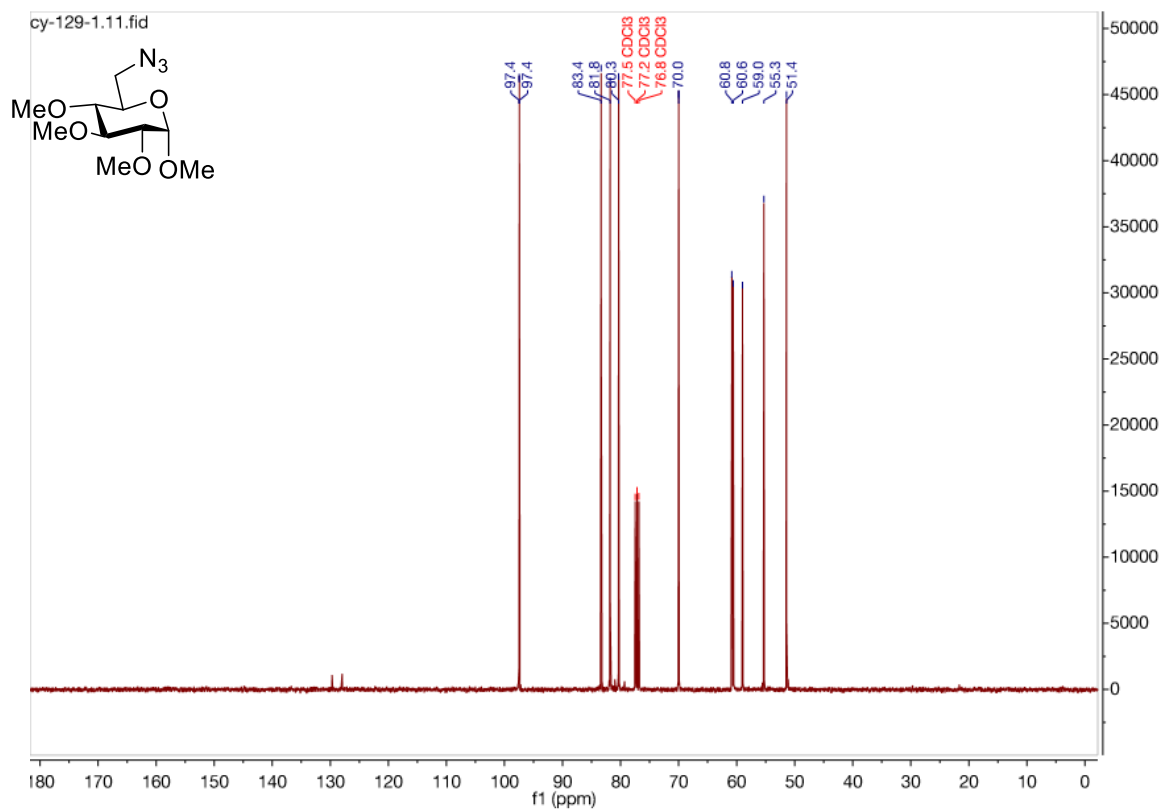

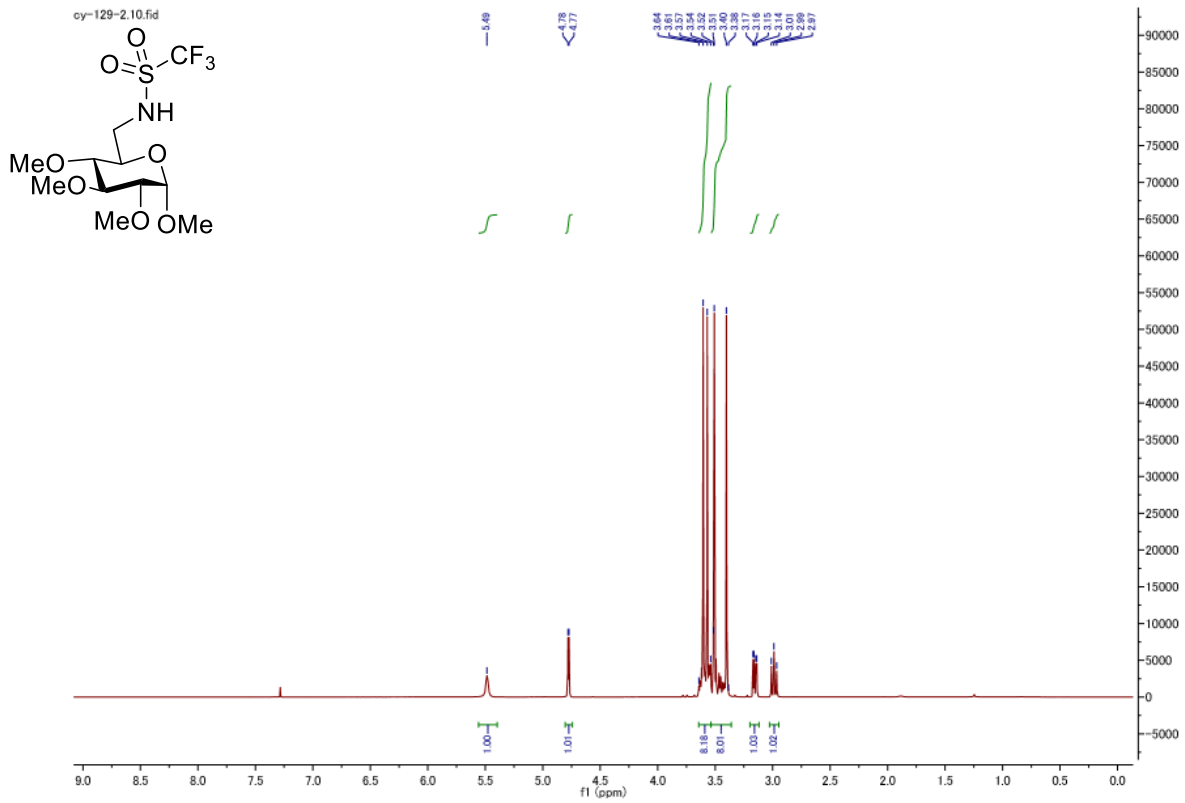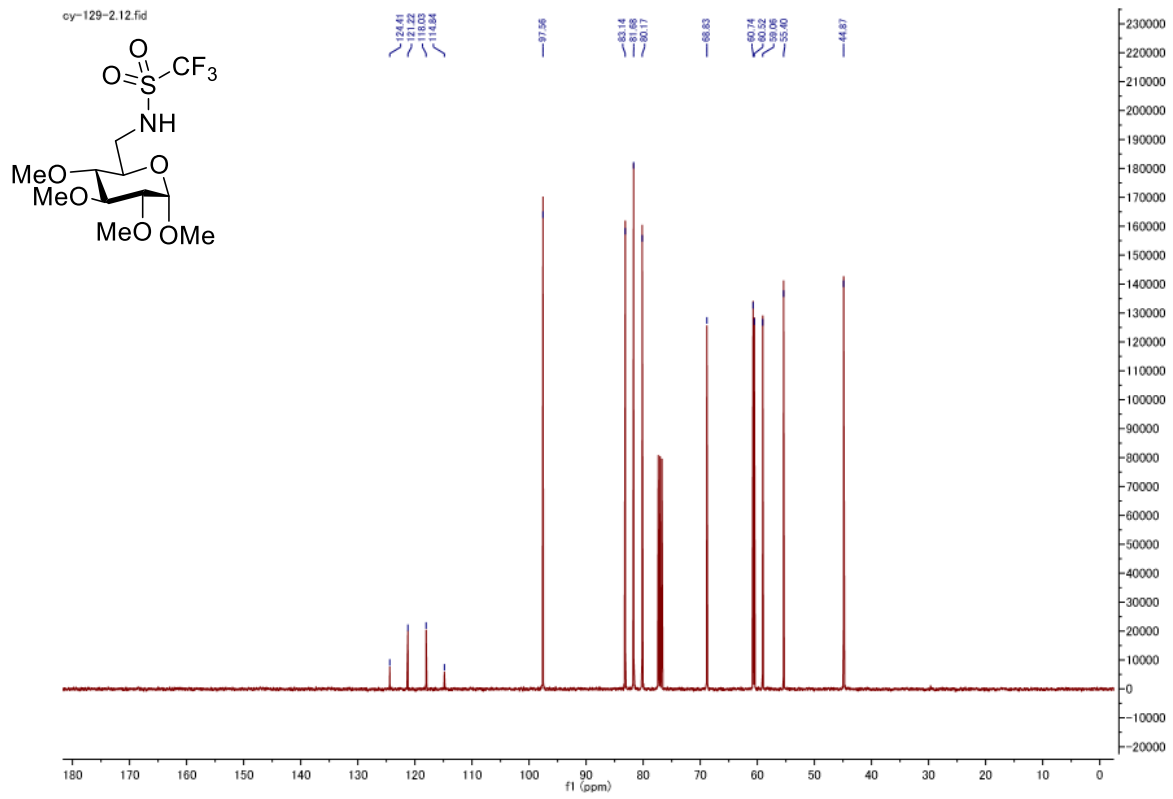



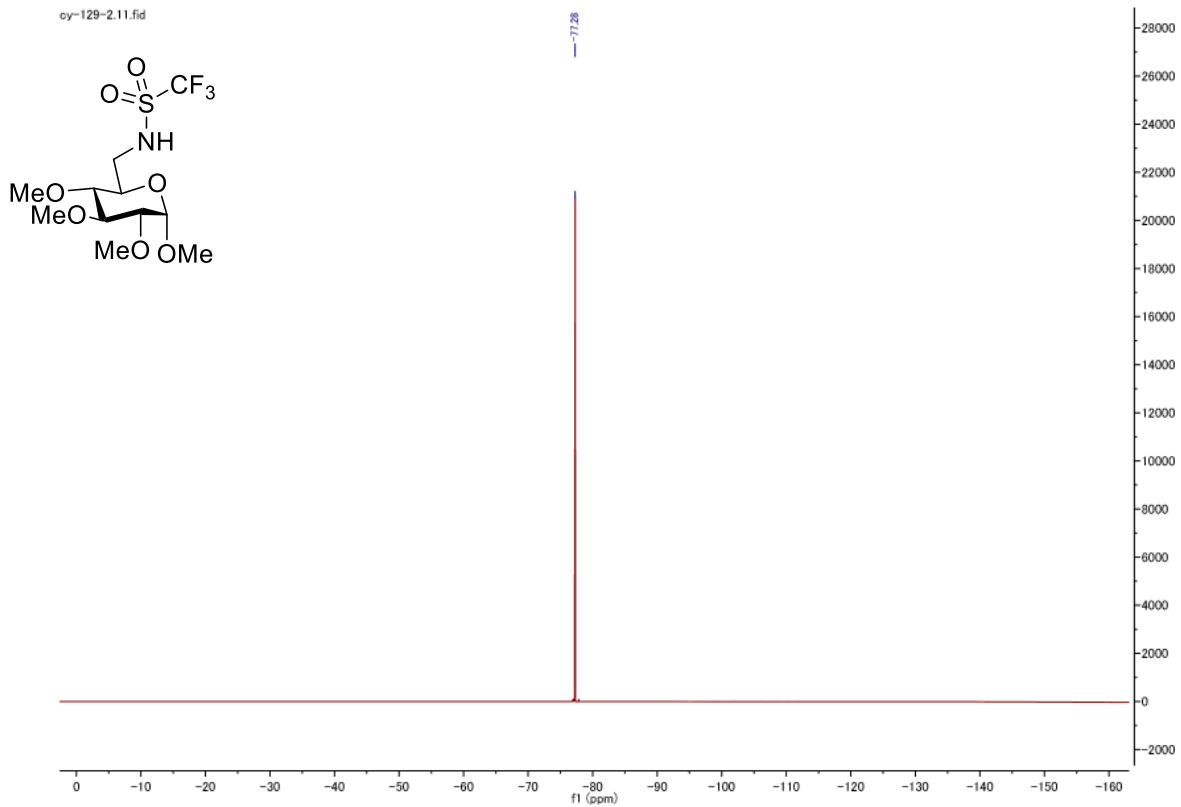

***tert*-butyl 2-((trifluoromethyl)sulfonamido)ethyl carbamate (II)**

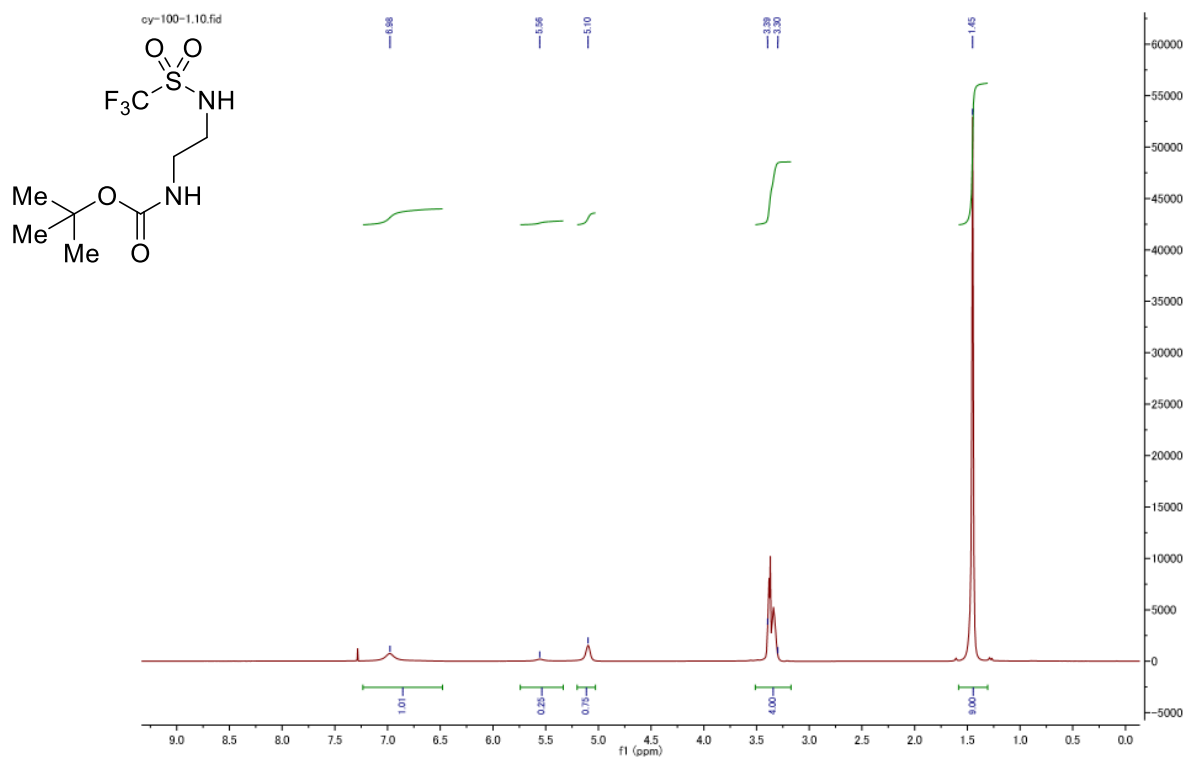

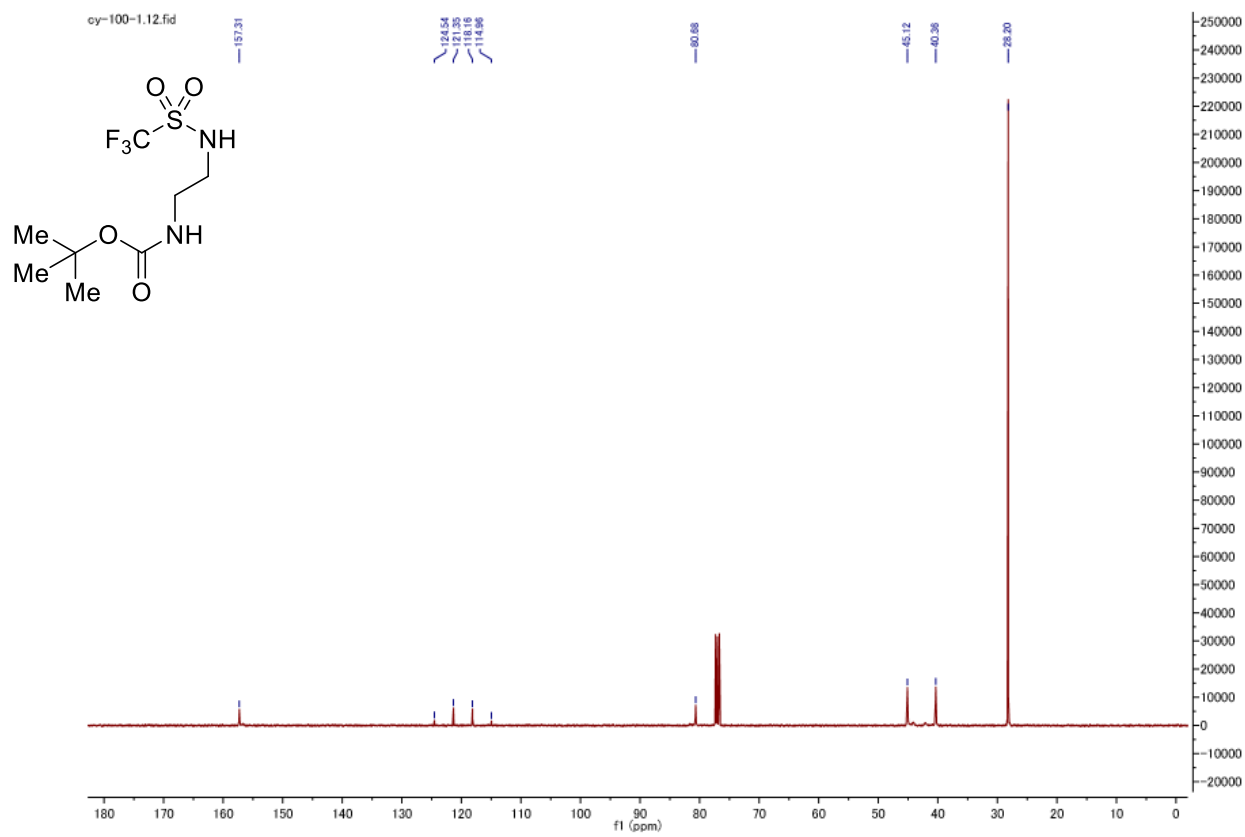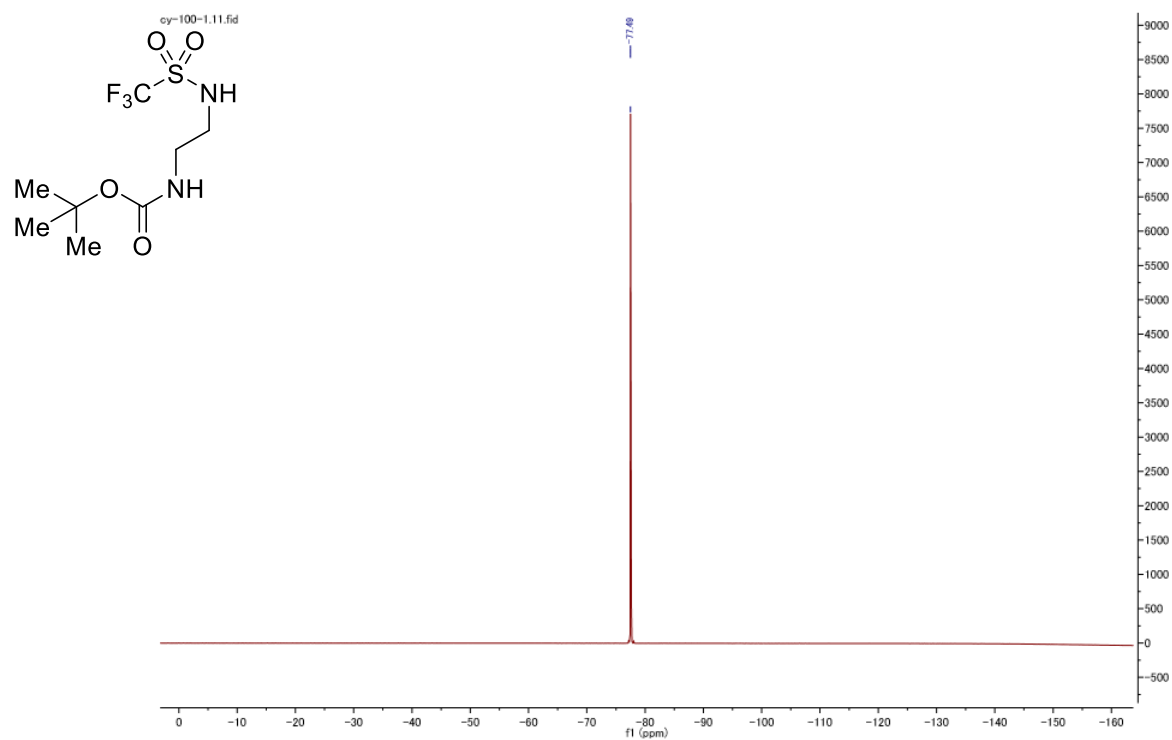

***tert*-butyl 4-(((trifluoromethyl)sulfonamido)methyl)piperidine-1-carboxylate (1m)**

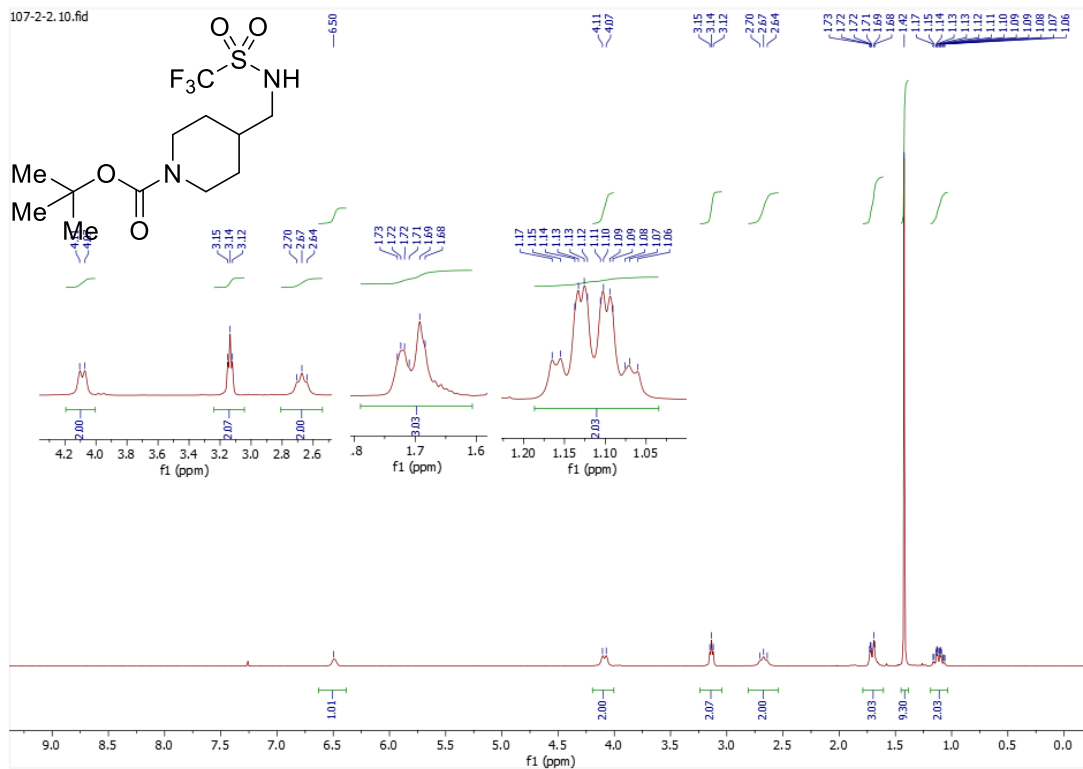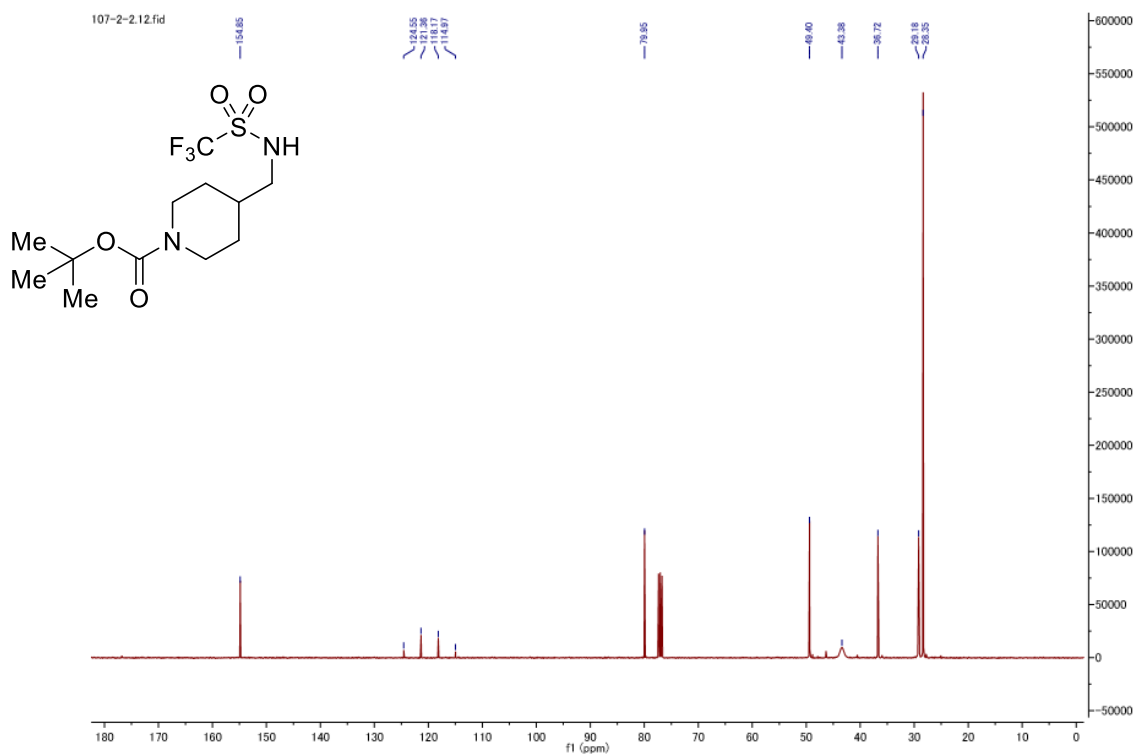

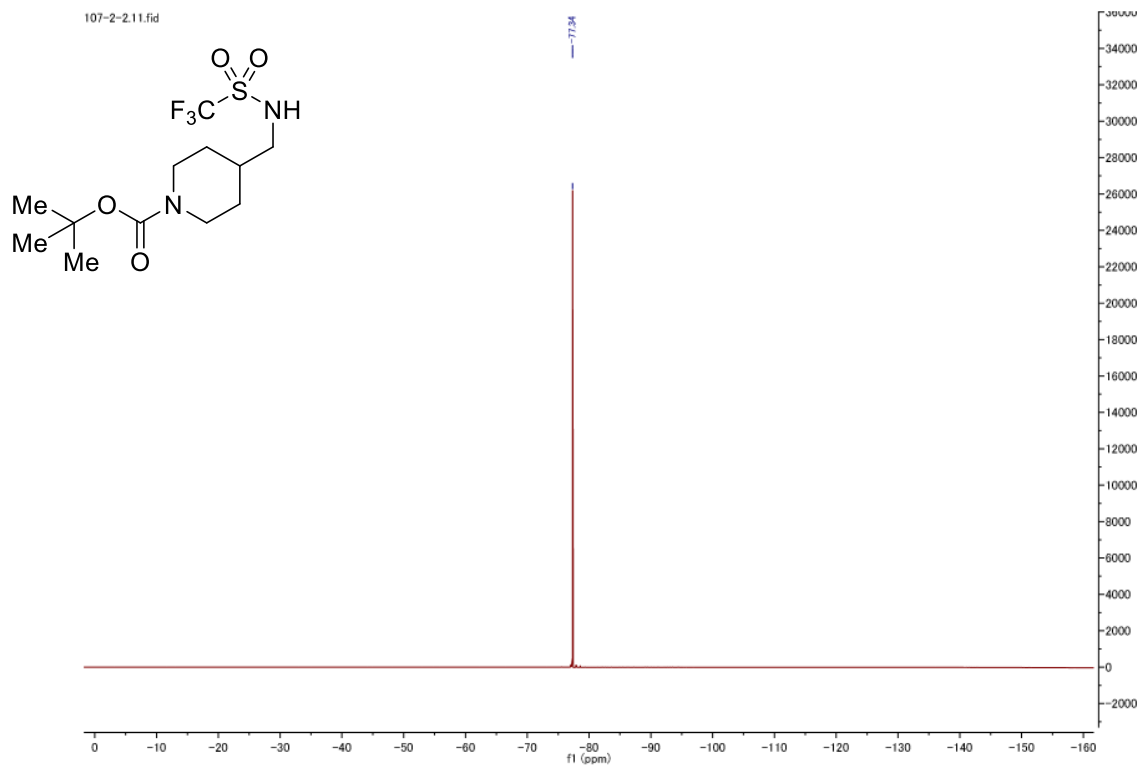

**methyl *N*<sup>2</sup>-(tert-butoxycarbonyl)-*N*<sup>6</sup>-((trifluoromethyl)sulfonyl)-L-lysinate (1n)**

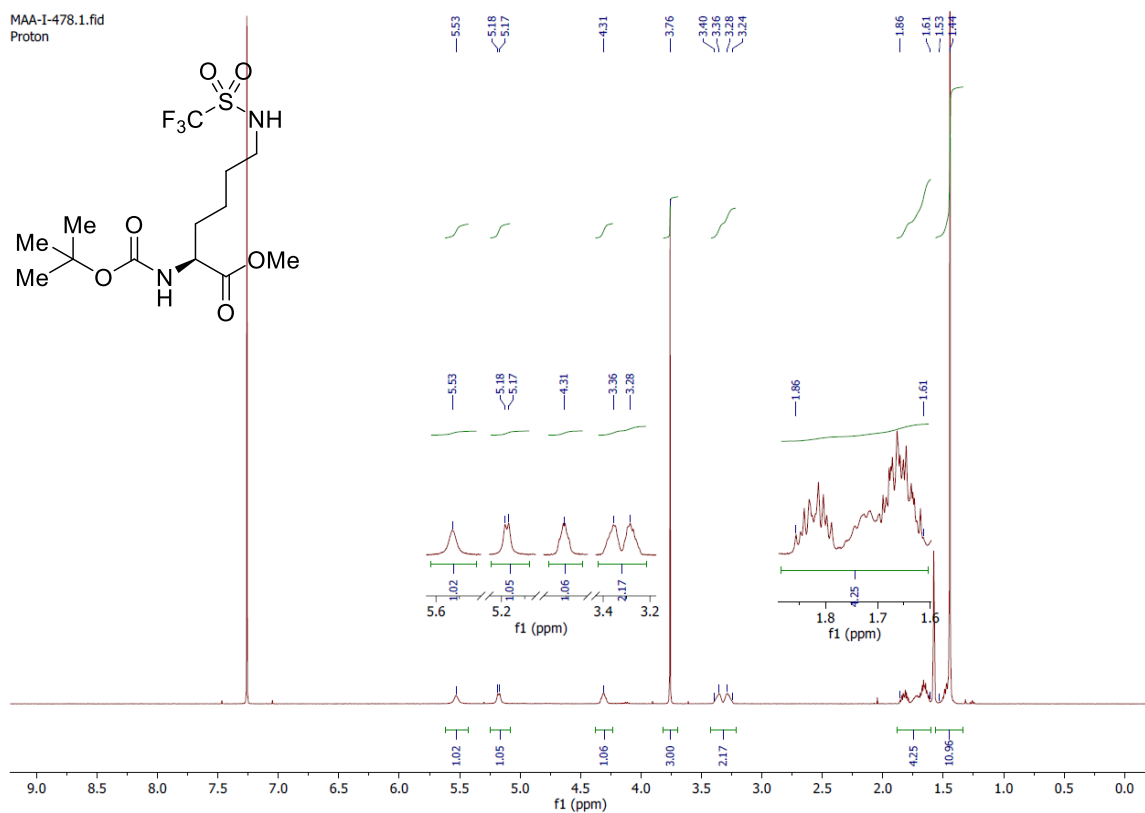

MAA-I-478-400.1.fid

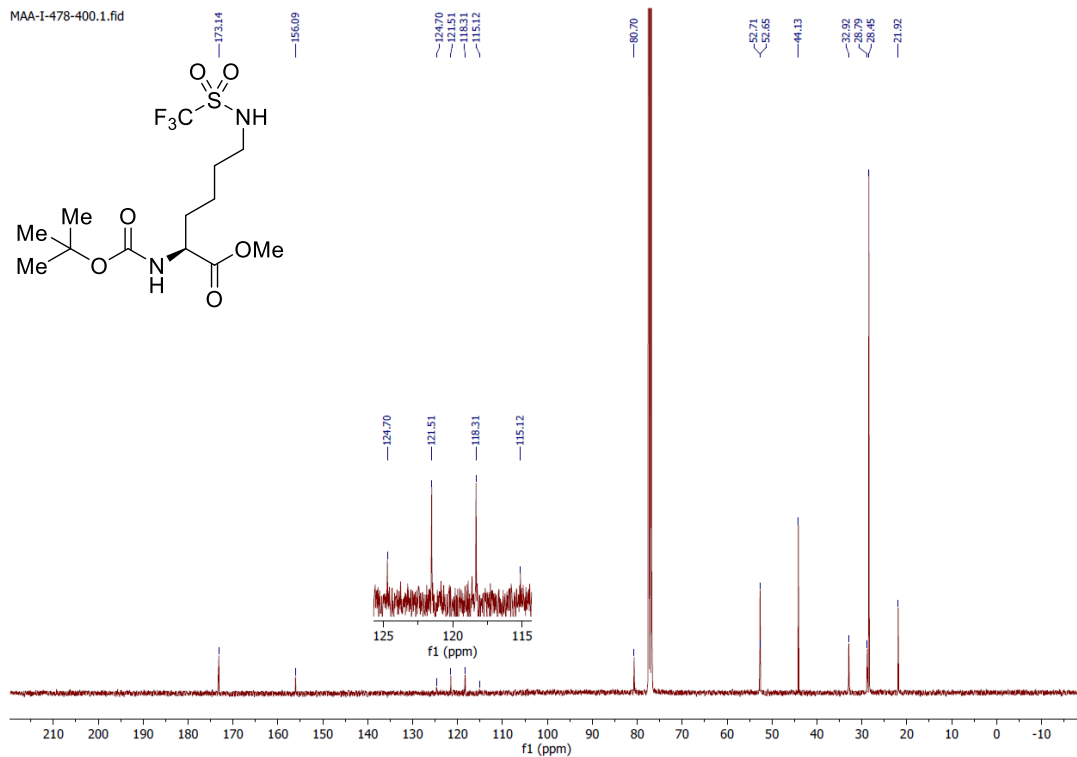

MAA-I-478.2.fid  
19F

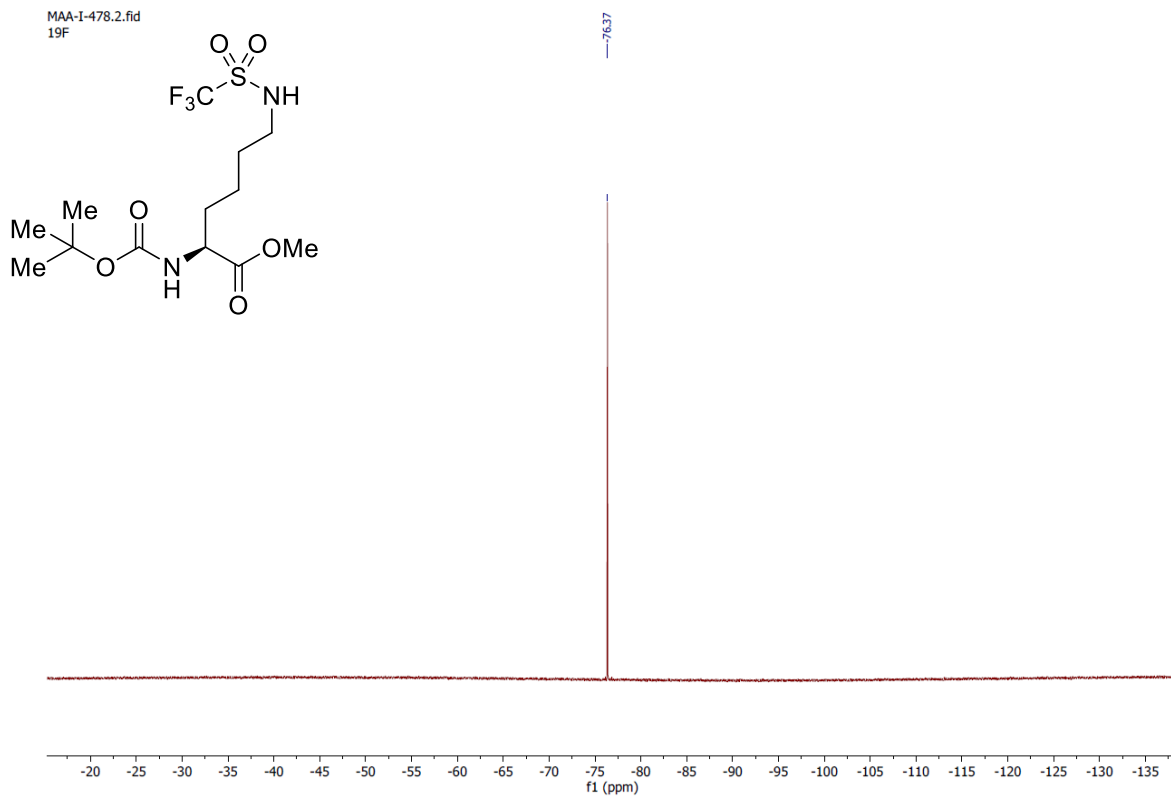

***N*-(2-(benzyloxy)ethyl)-1,1,1-trifluoromethanesulfonamide (1o)**

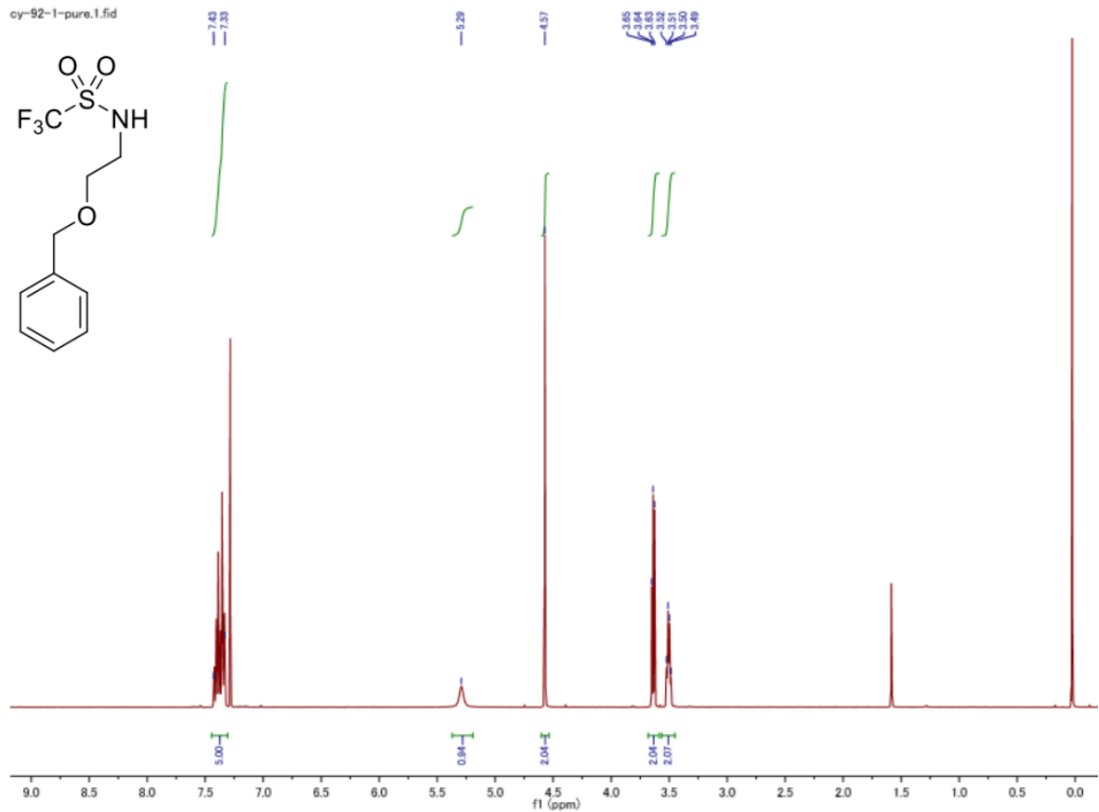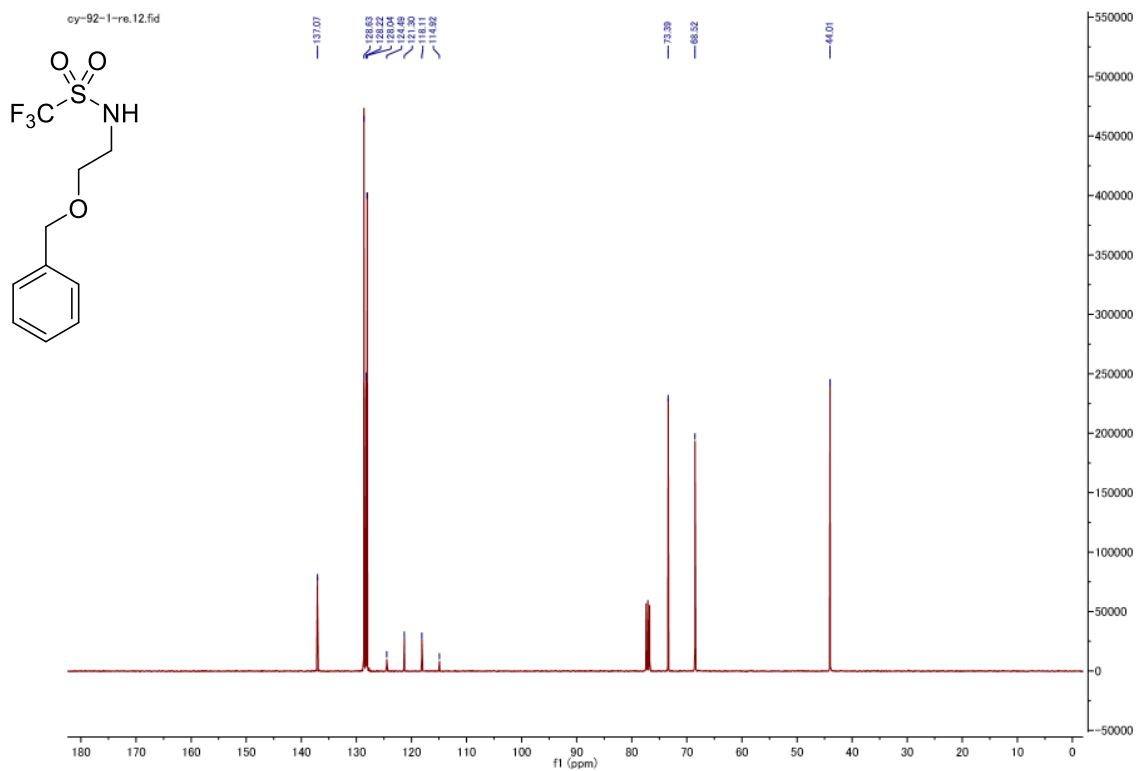

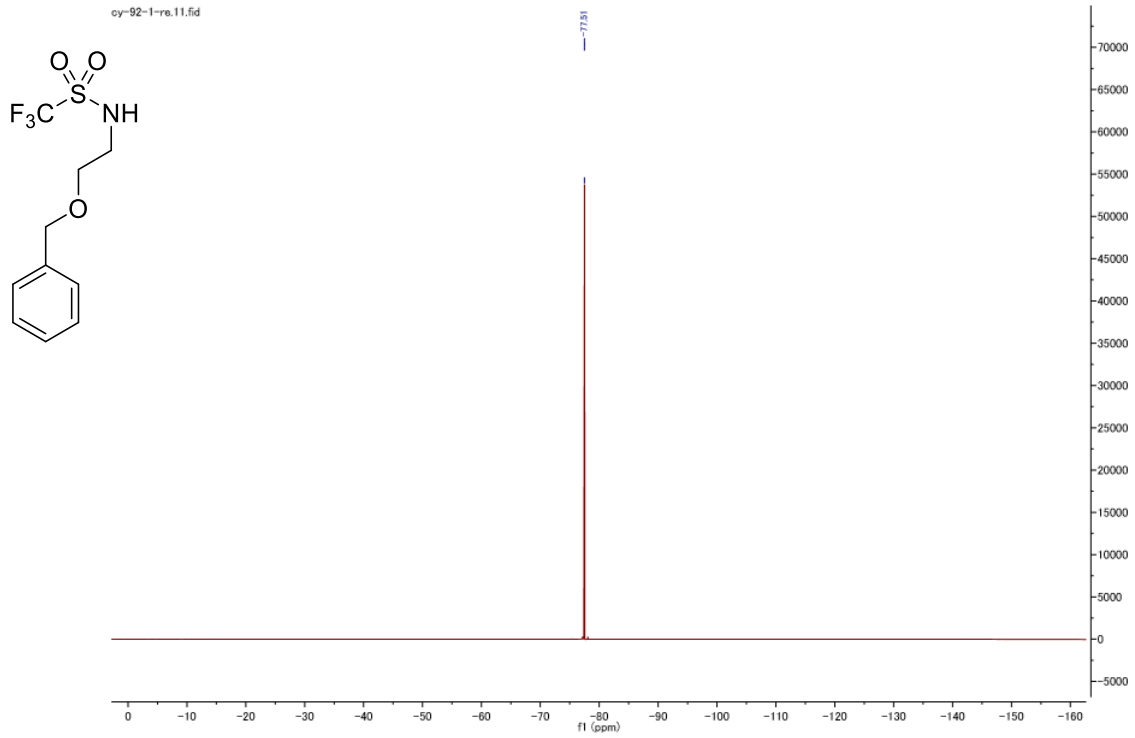

**1,1,1-trifluoro-N-(4-phenylbutyl)methanesulfonamide (1p)**

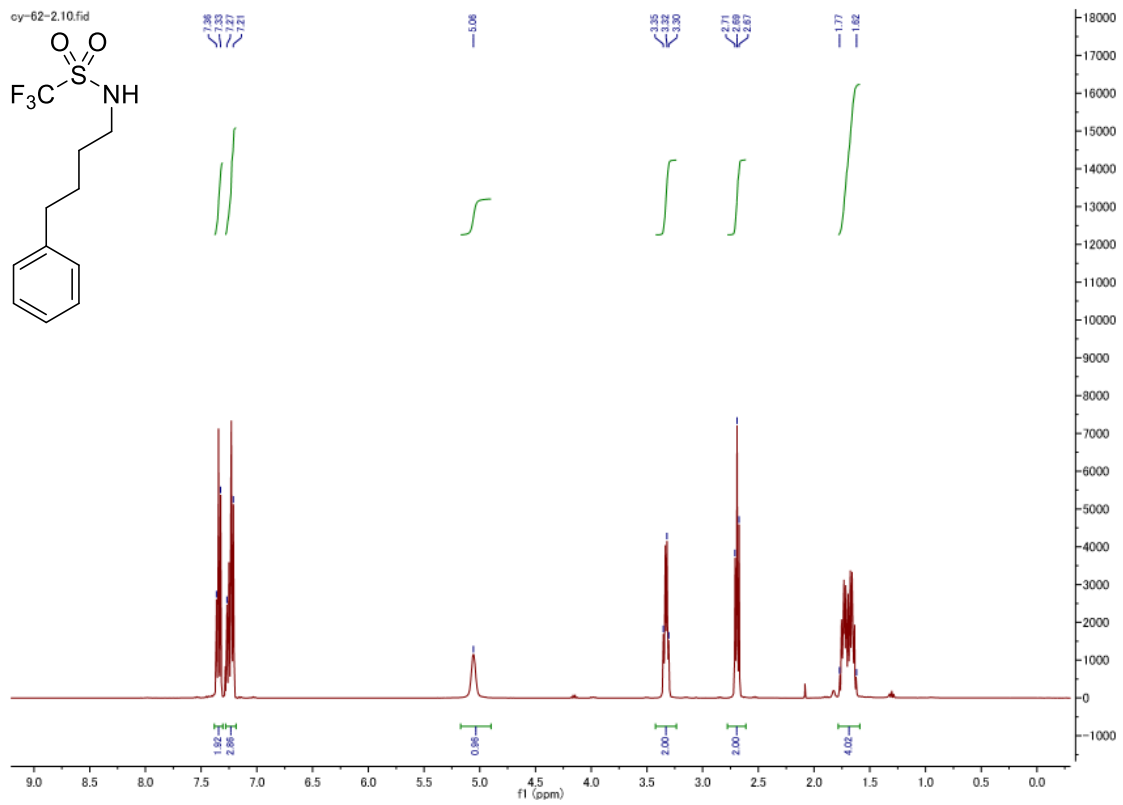

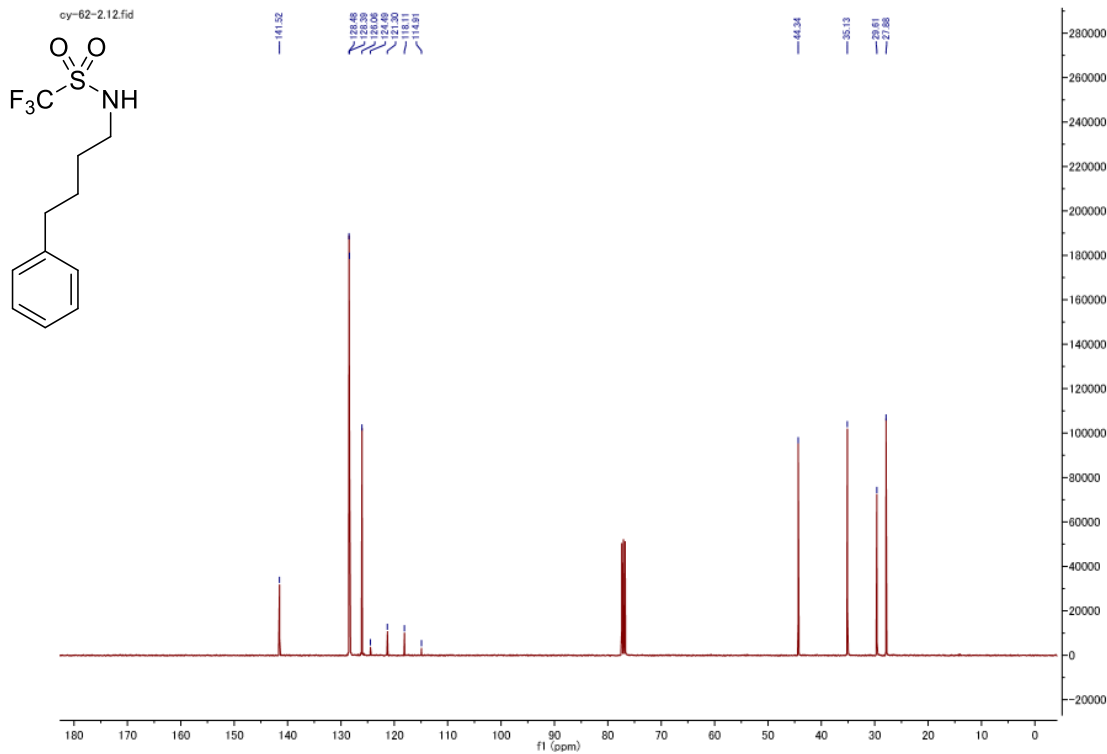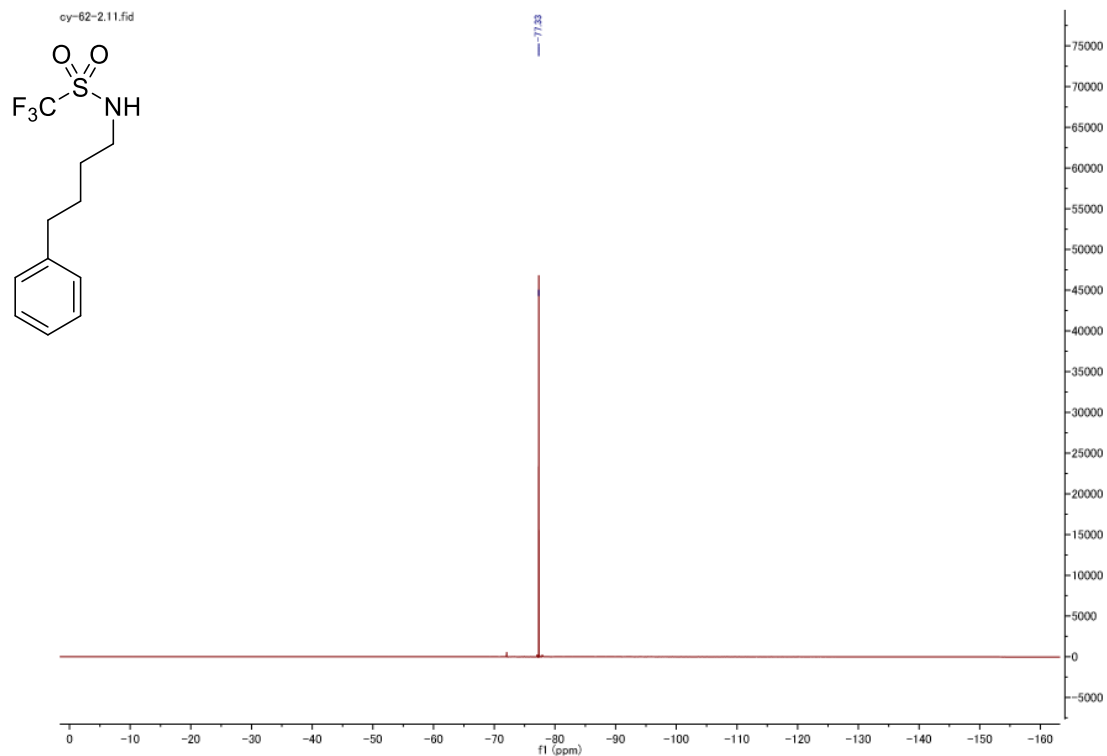



# 1,1,1-trifluoro-N-(4-methylpentyl)methanesulfonamide (1q)

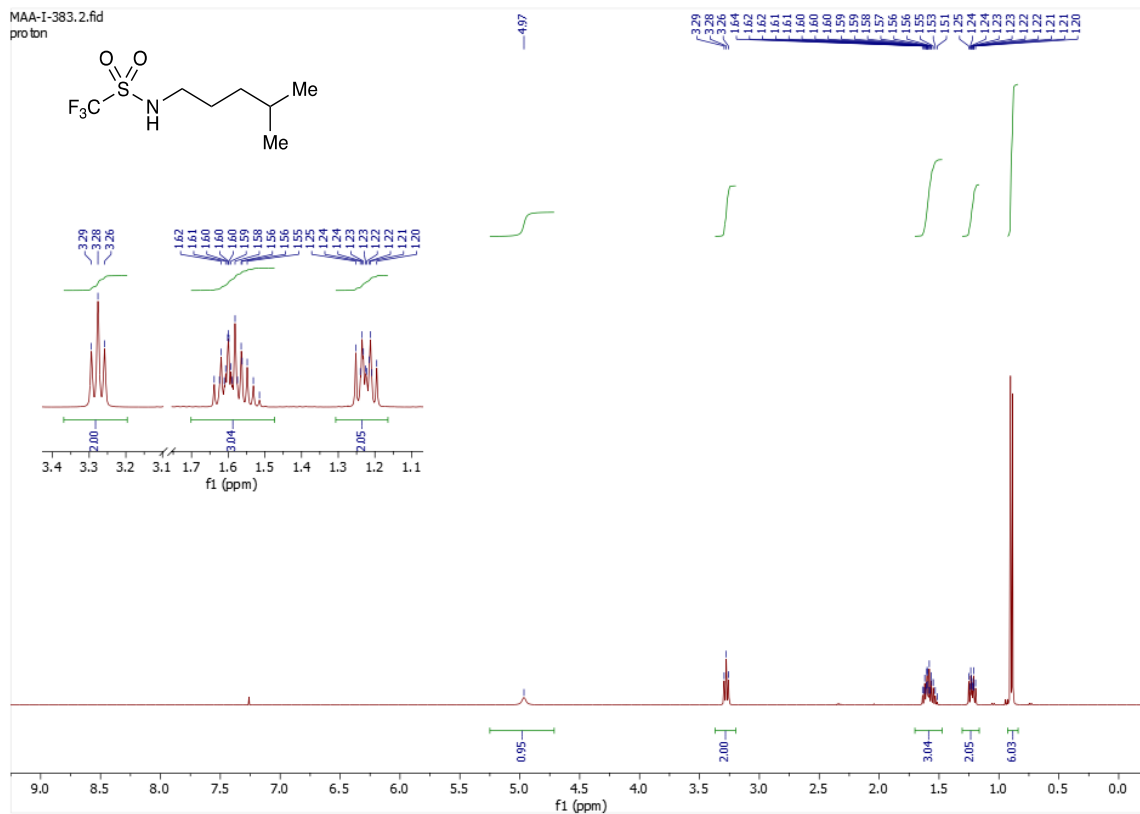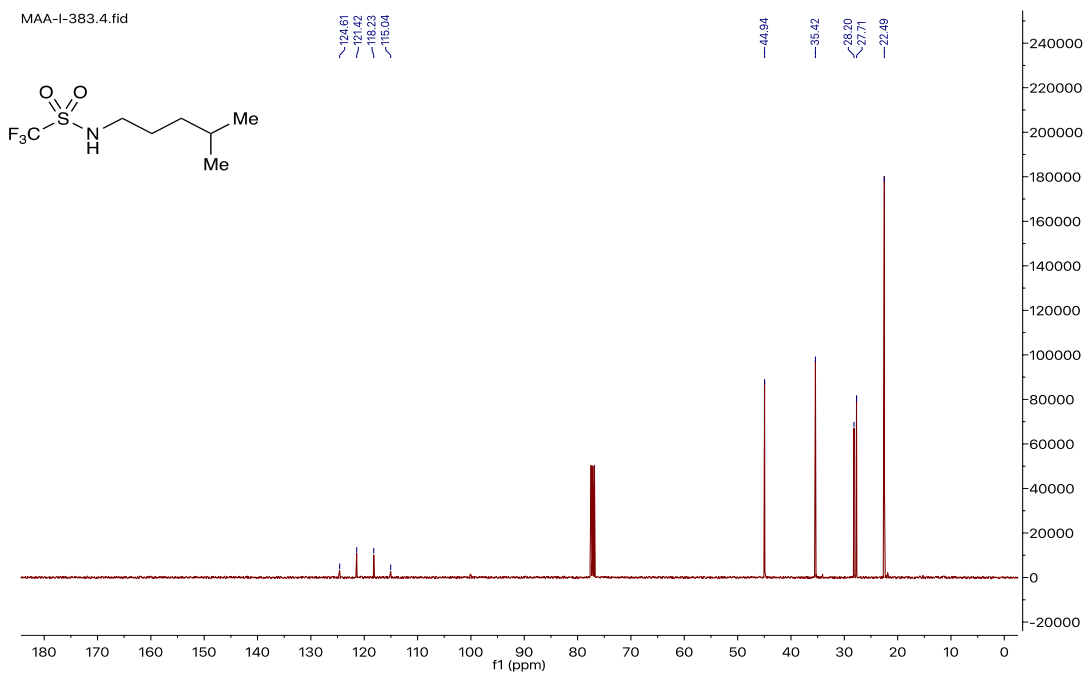

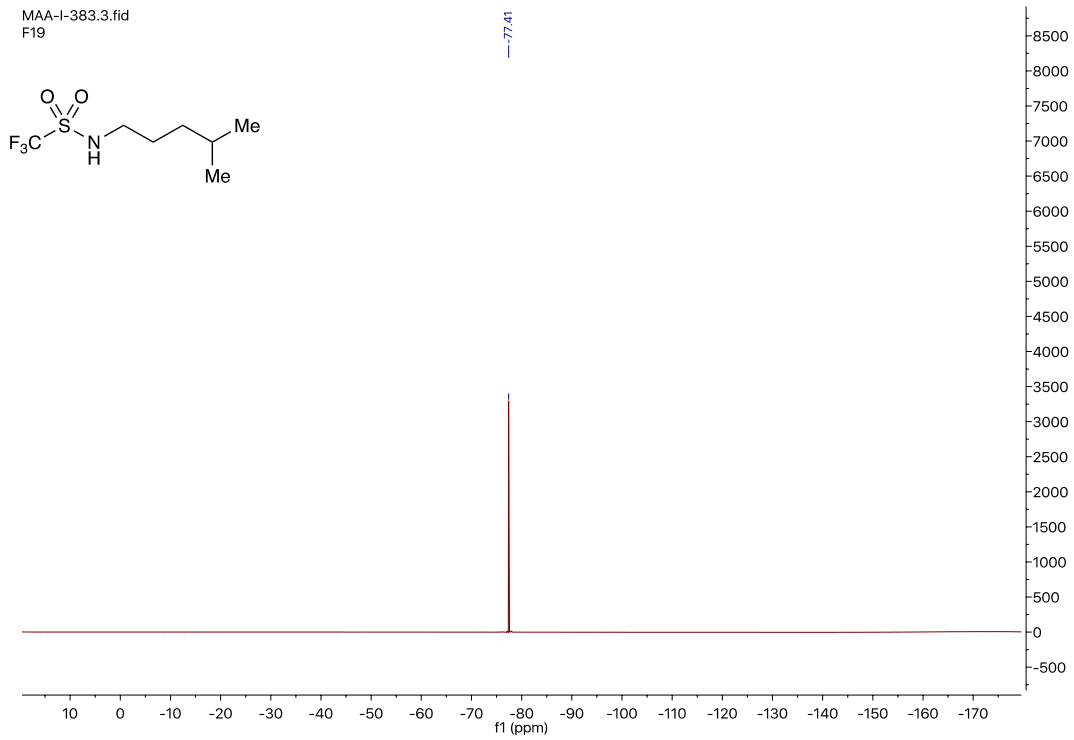

### 1,1,1-trifluoro-*N*-octylmethanesulfonamide (1r)

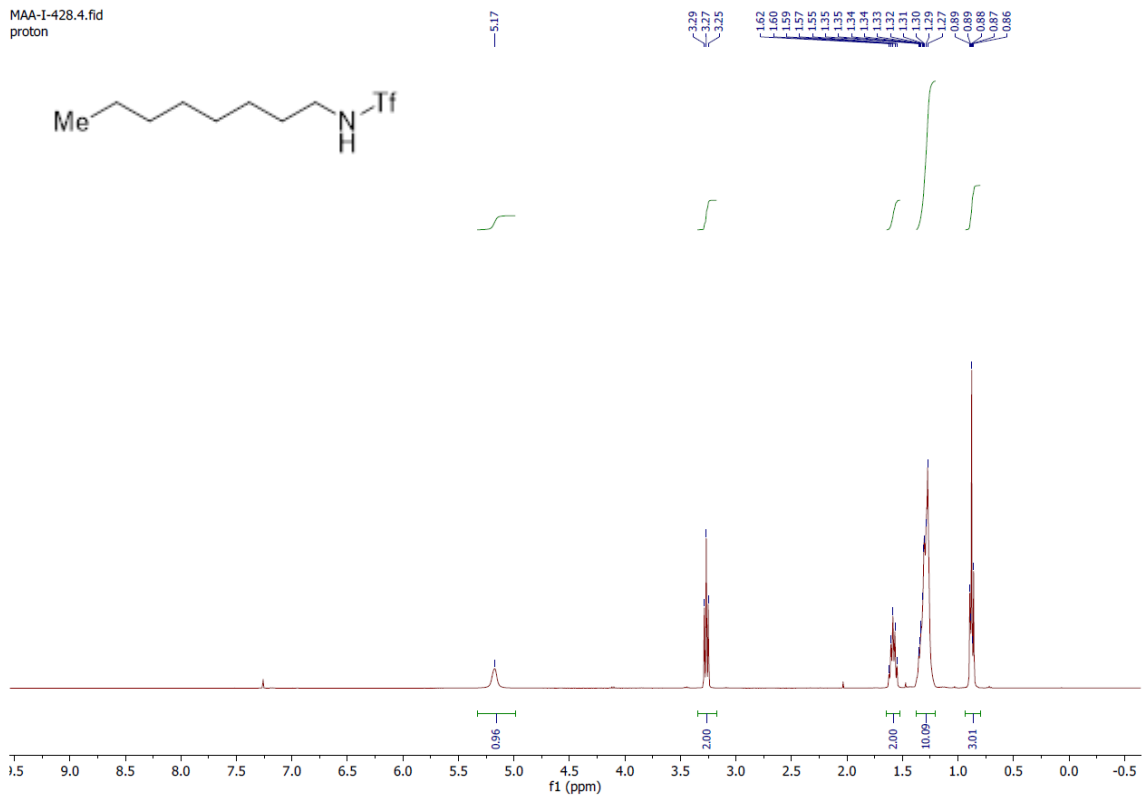

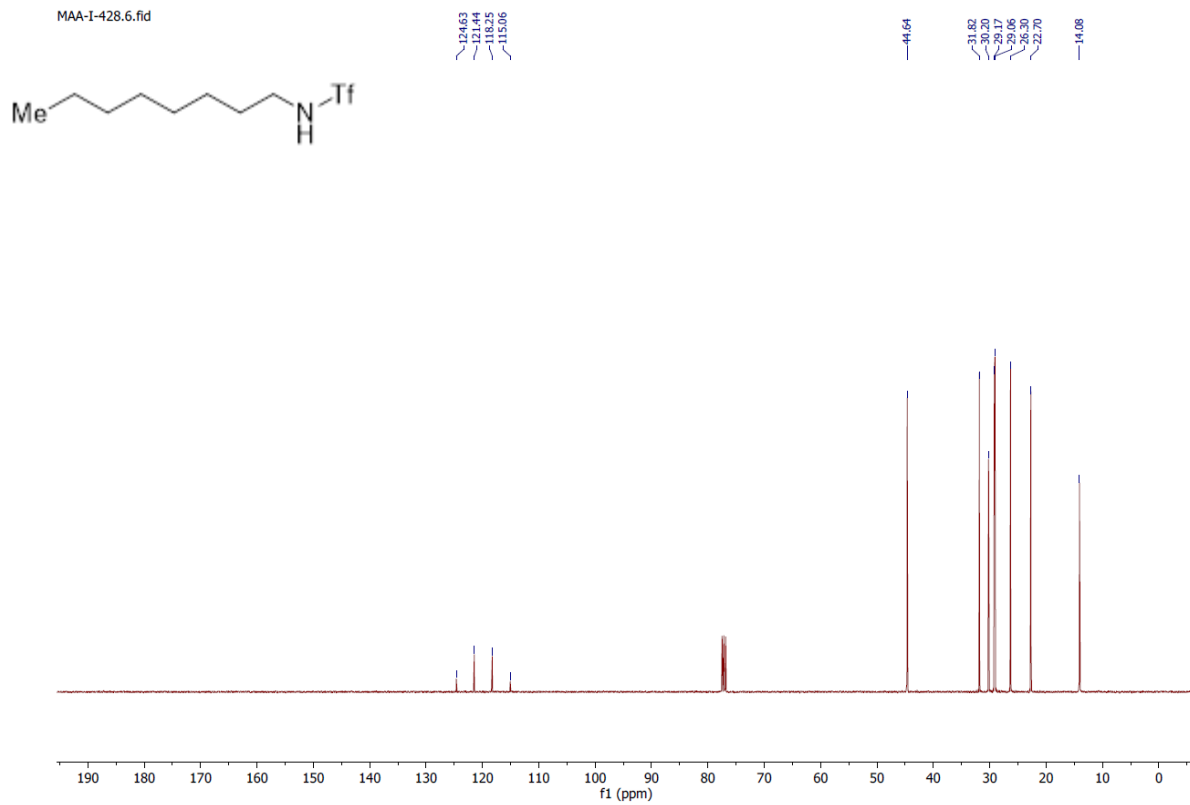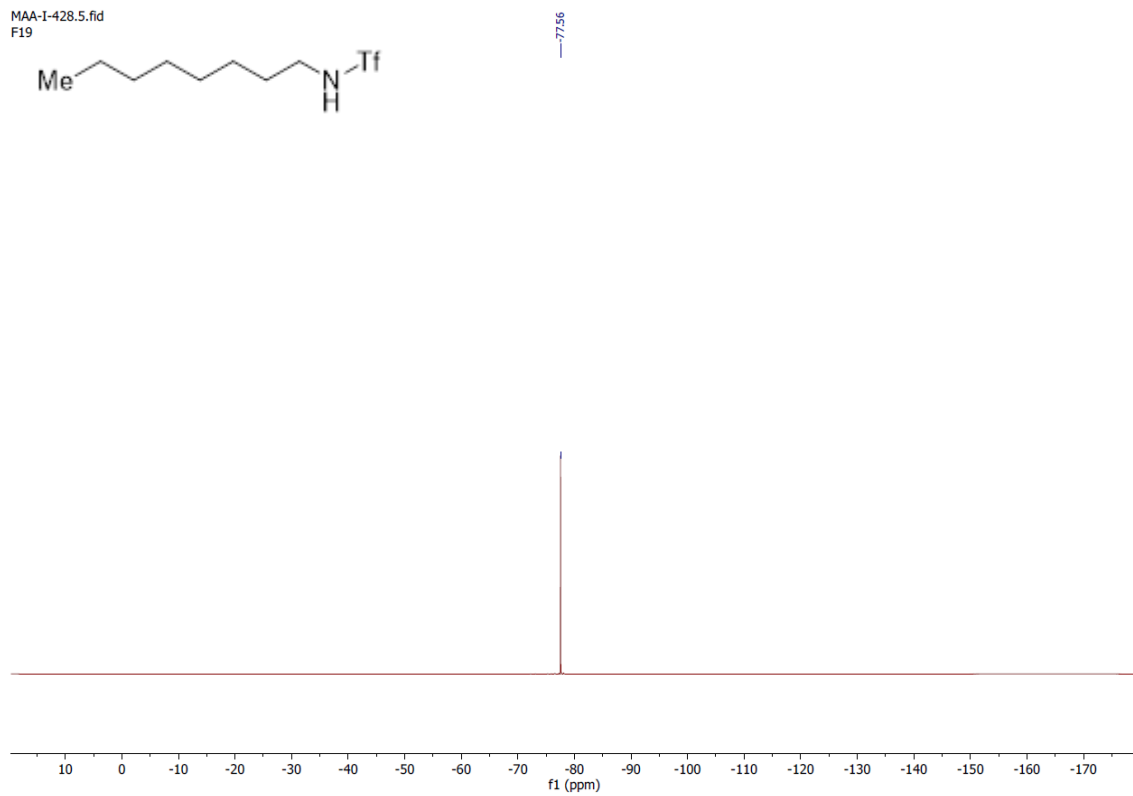

**1,1,1-trifluoro-N-(3-phenylpropyl-1,1-d<sub>2</sub>)methanesulfonamide (1s-D<sub>2</sub>)**

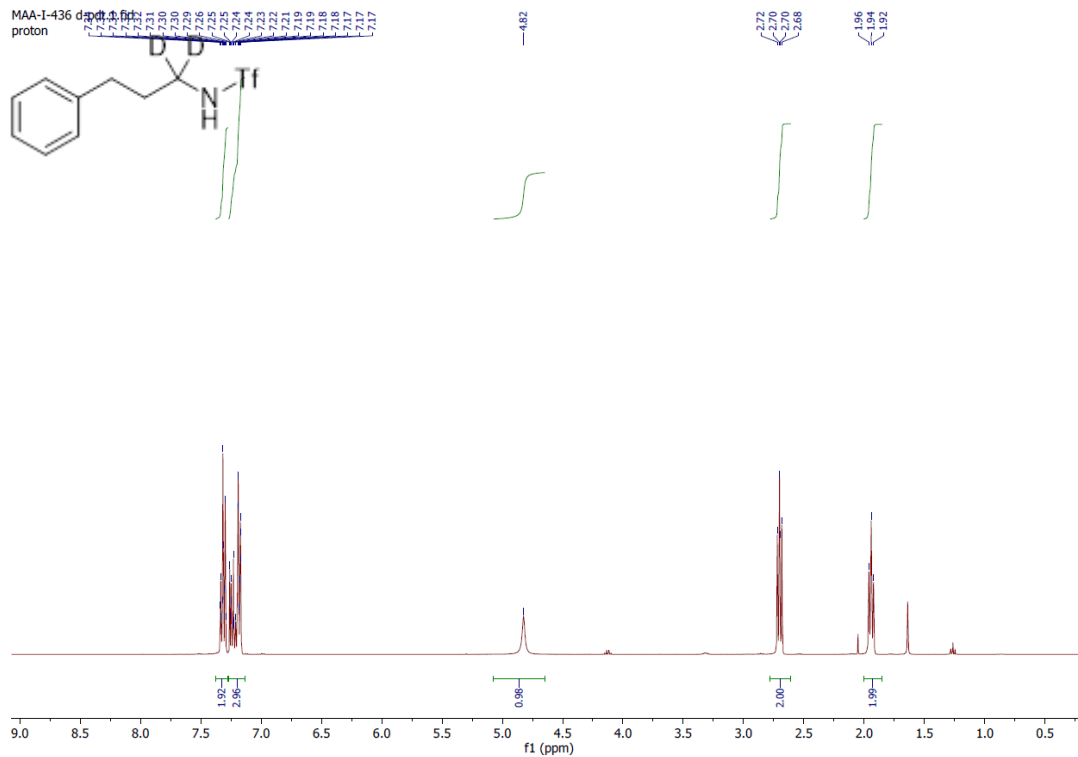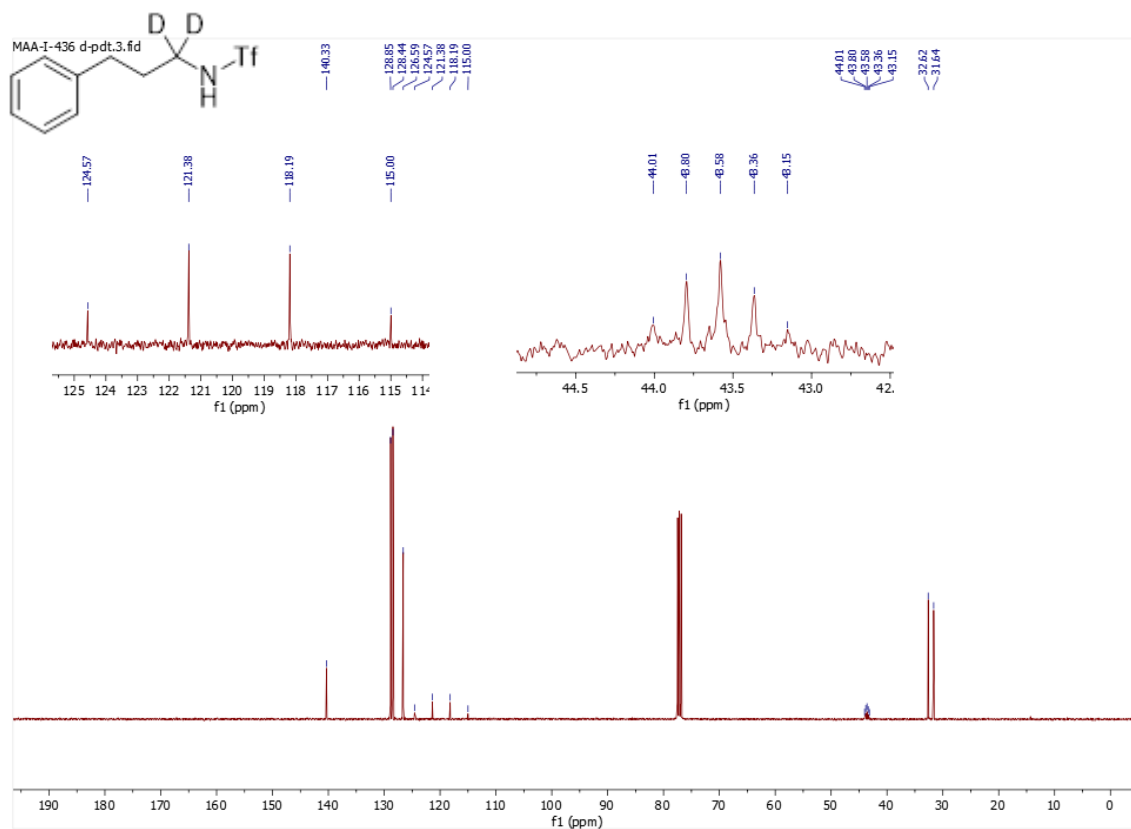

MAA-I-436 d-pdt.2.fid  
F19

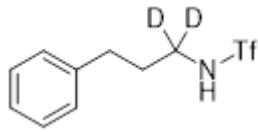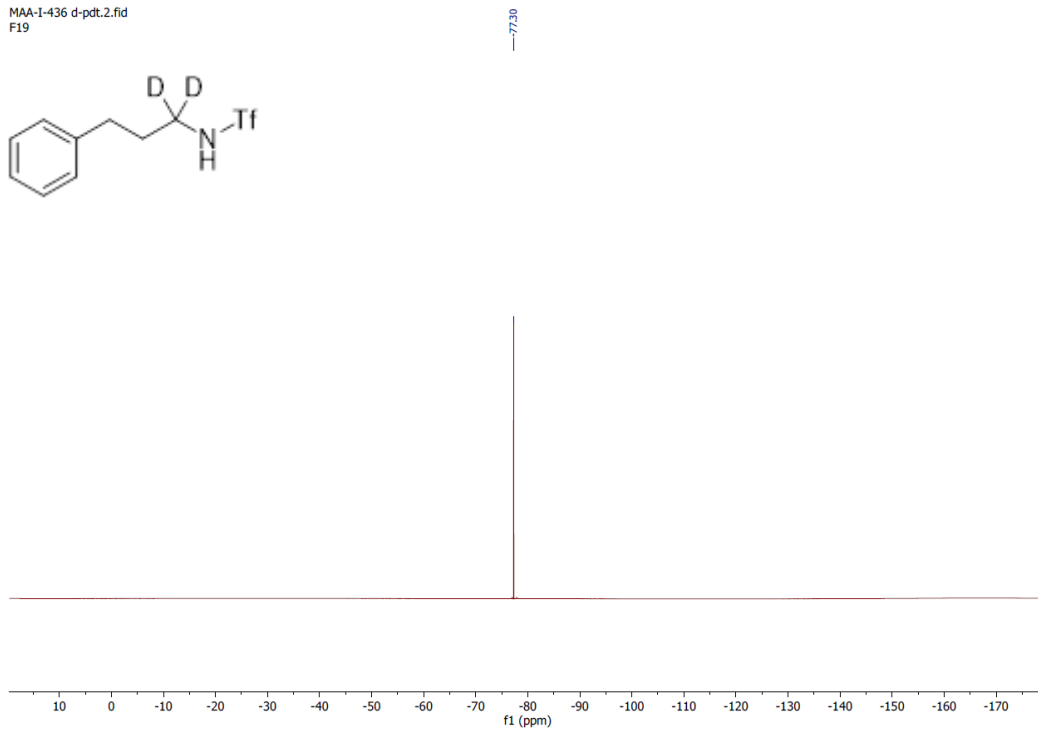

### 1,1,1-trifluoro-N-(3-phenylpropyl)methanesulfonamide (3s-H<sub>2</sub>)

MAA-I-441.6.fid  
proton

7.34 7.33 7.32 7.31 7.30 7.25 7.25 7.23 7.22 7.21 7.19 7.18 7.17 7.17 4.73 3.36 3.34 3.33 3.31 2.72 2.71 2.69 1.99 1.98 1.96 1.96 1.94 1.94 1.92

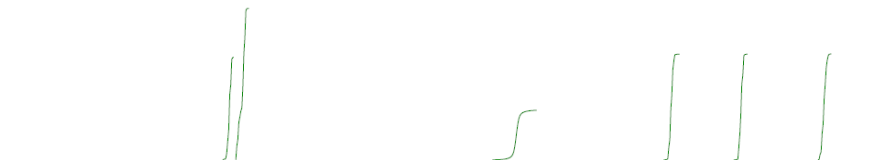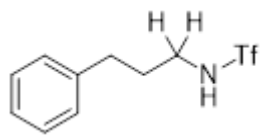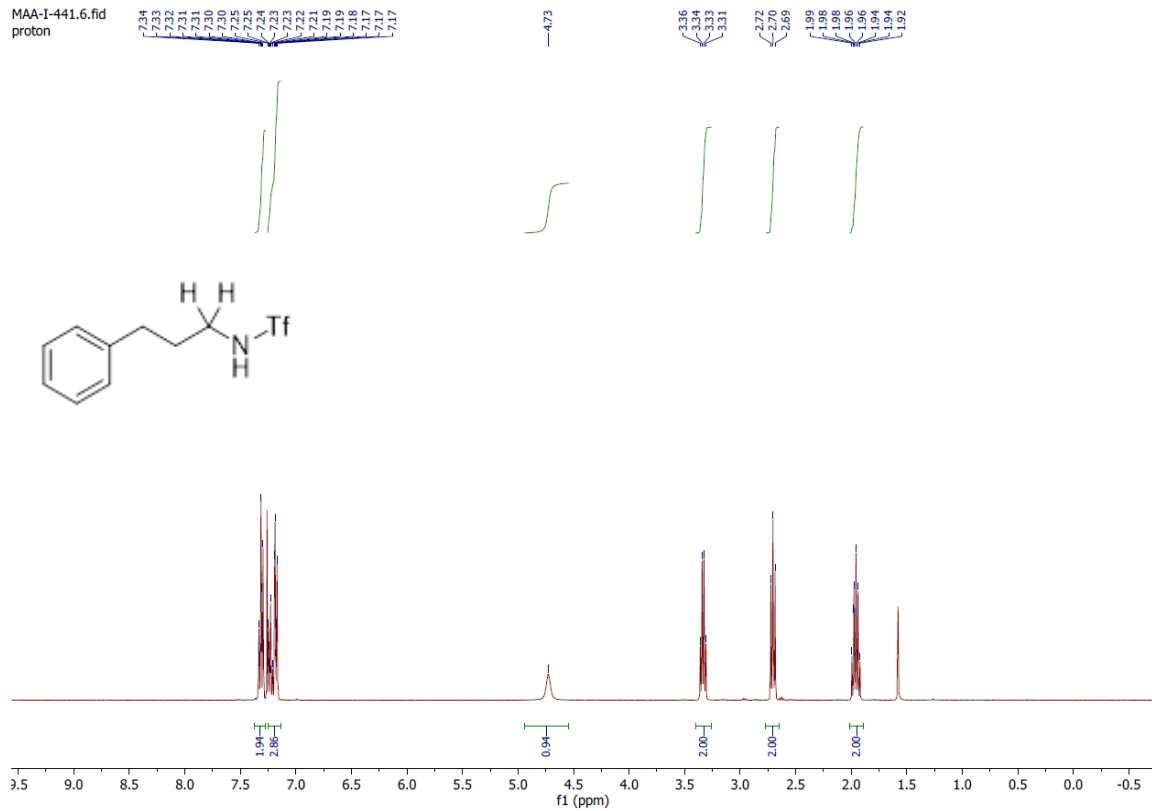

MAA-I-441.5.fid

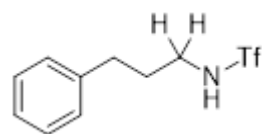

140.29  
128.97  
128.44  
128.43  
126.62  
124.57  
121.38  
118.19  
115.00  
44.17  
32.71  
31.89

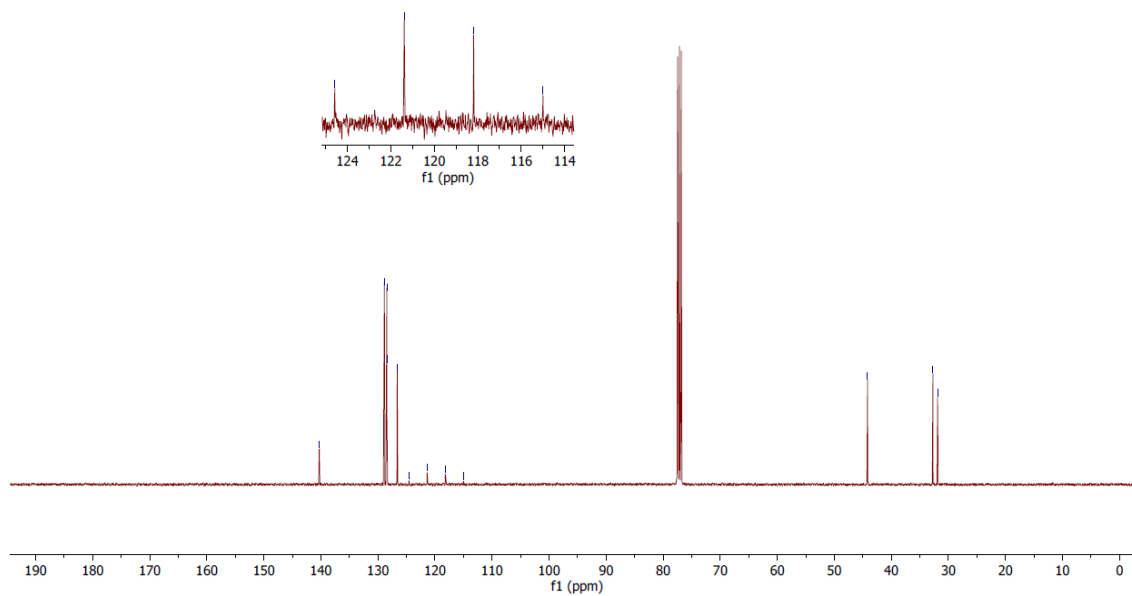

MAA-I-441.4.fid  
F19

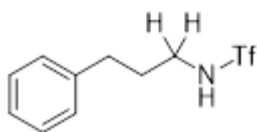

77.27

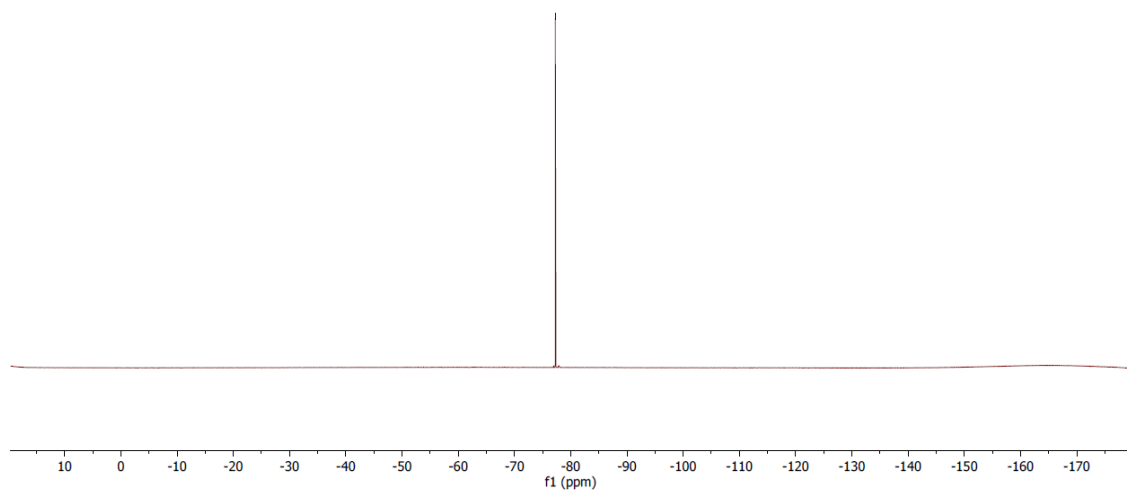

**tert-butyl 4-((trifluoromethyl)sulfonamido)hexanoate (3aa)**

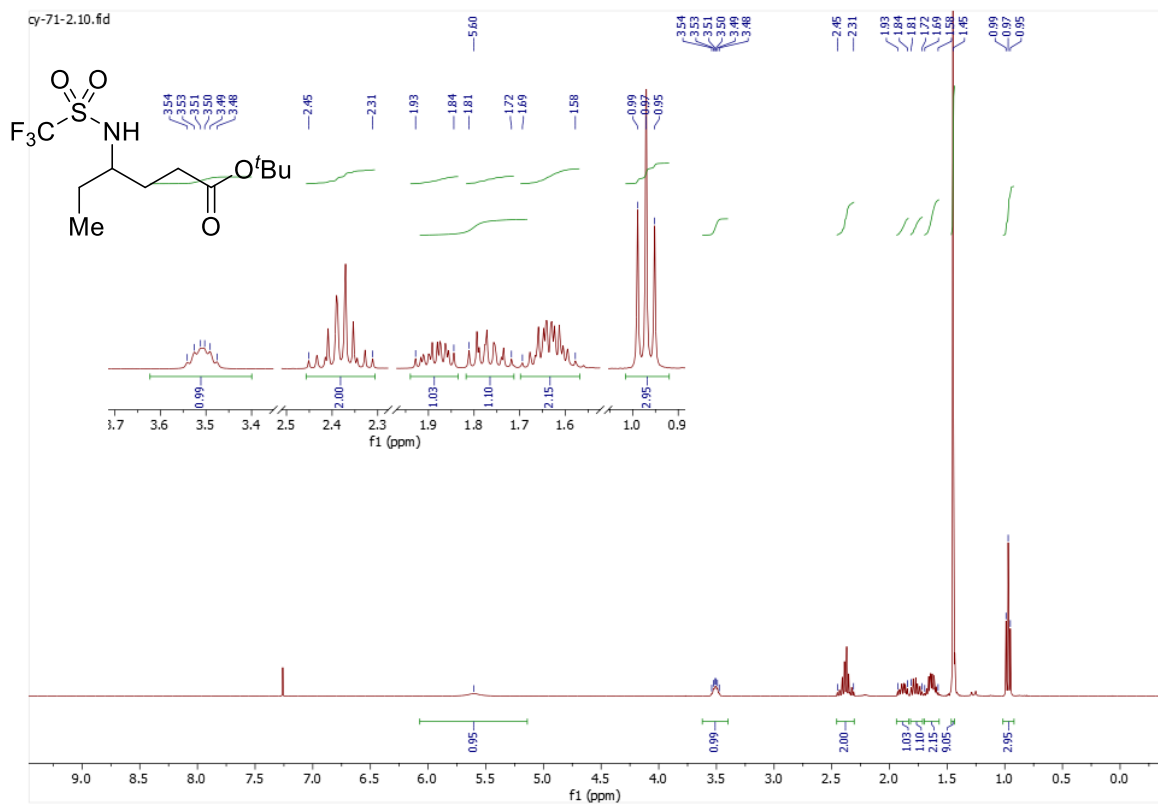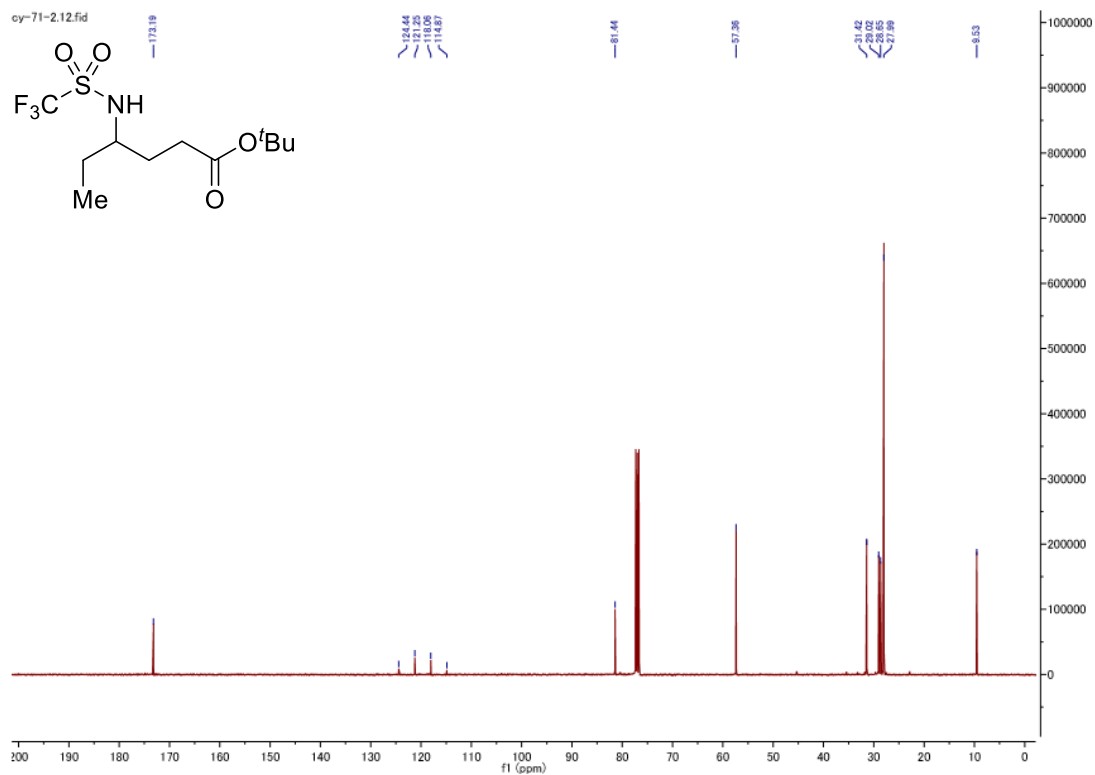

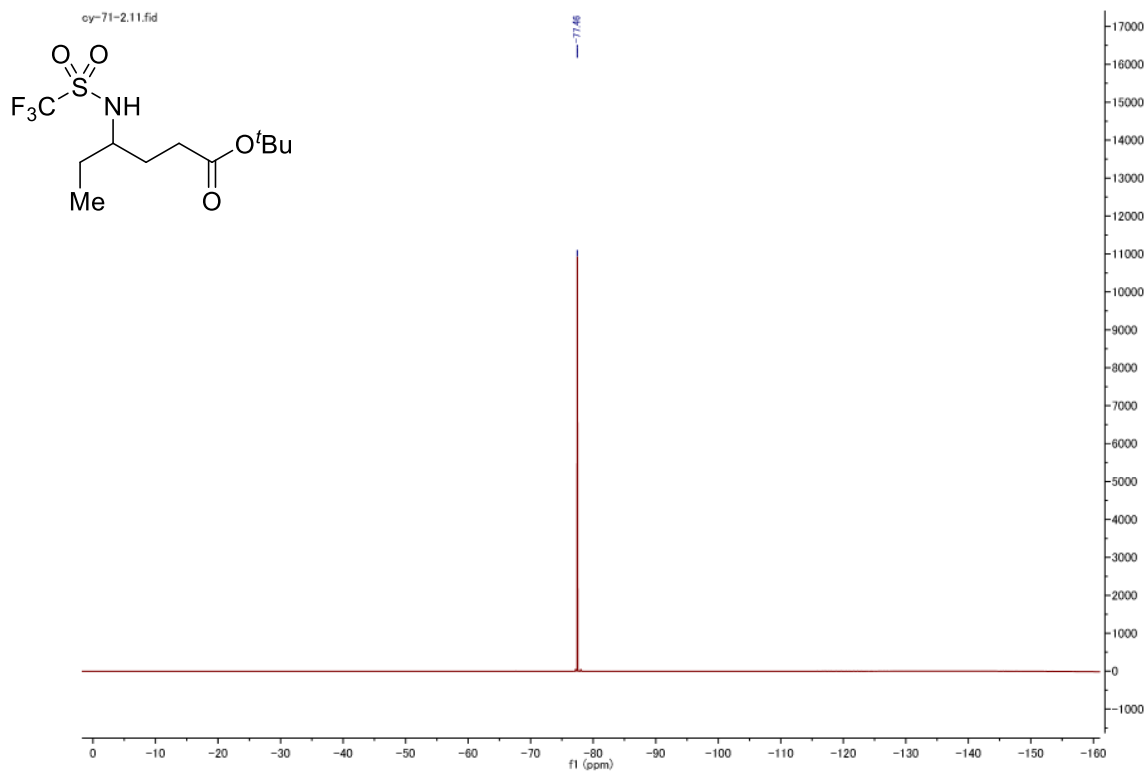

**ethyl 4-((trifluoromethyl)sulfonamido)hexanoate (3ab)**

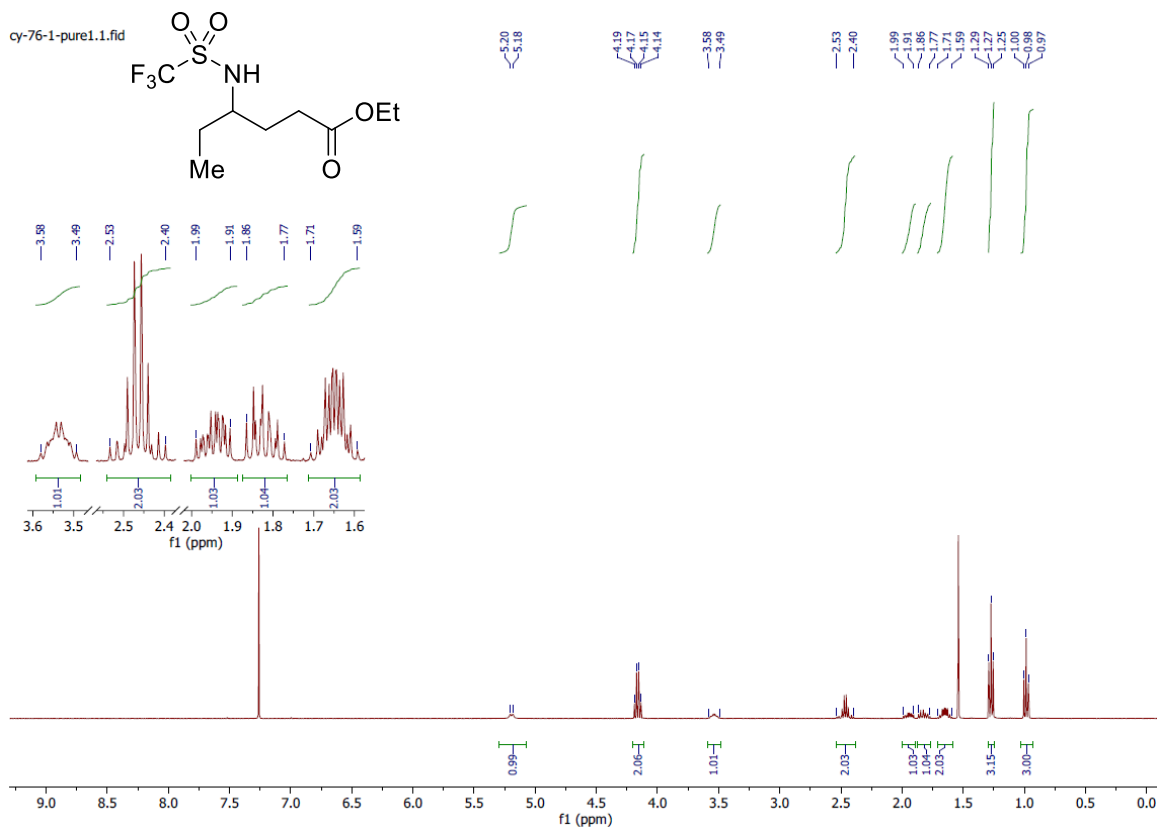



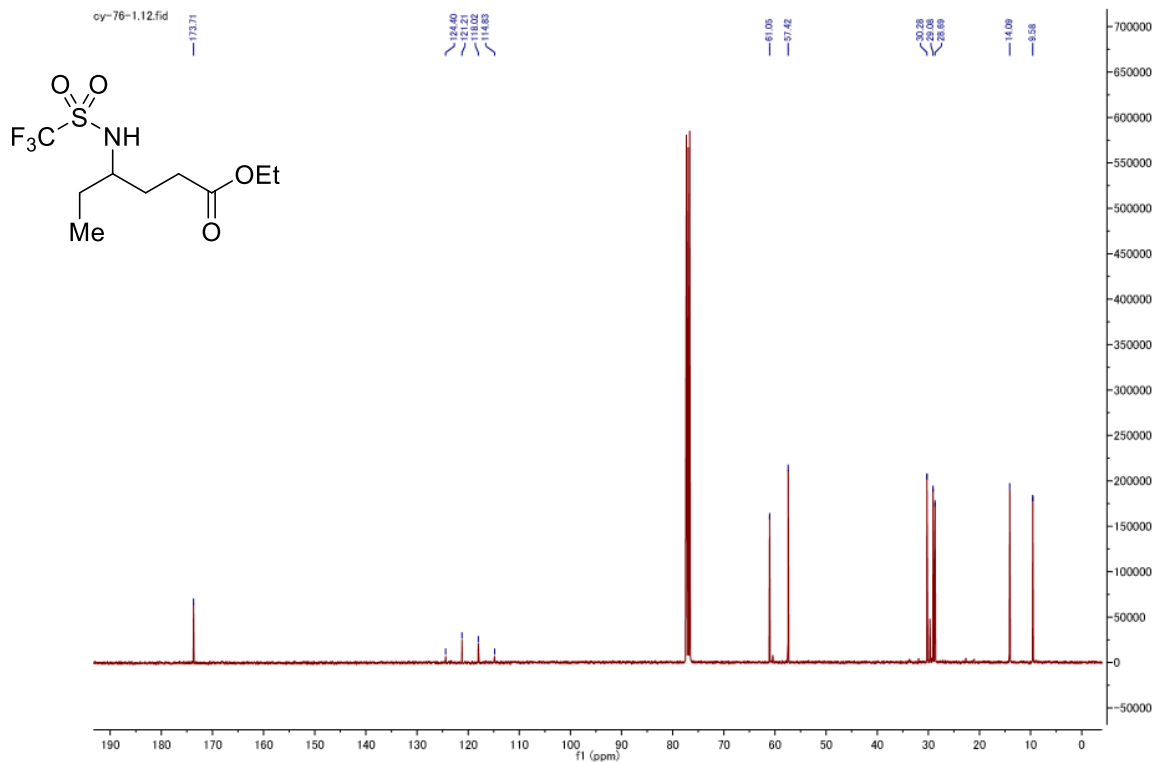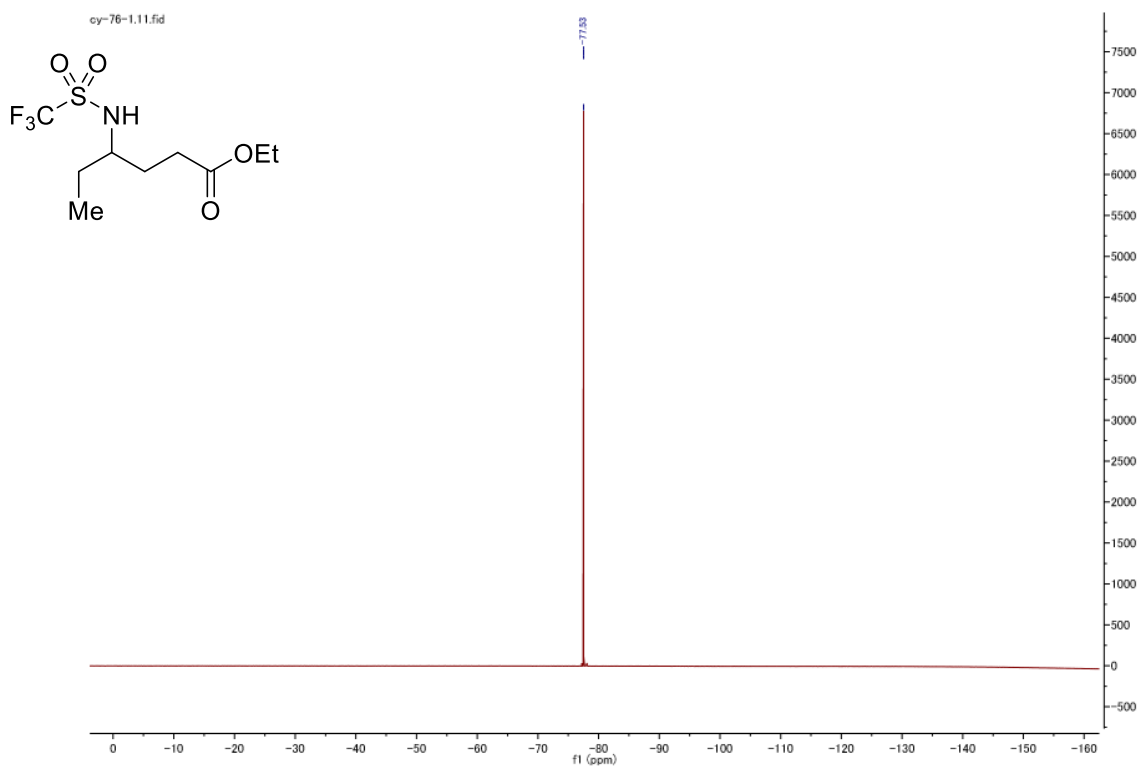

# methyl 4-((trifluoromethyl)sulfonamido)hexanoate (3ac)

cy-79-1-pure1.1.fid

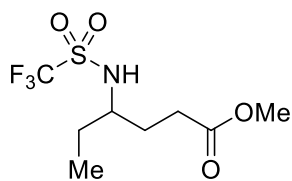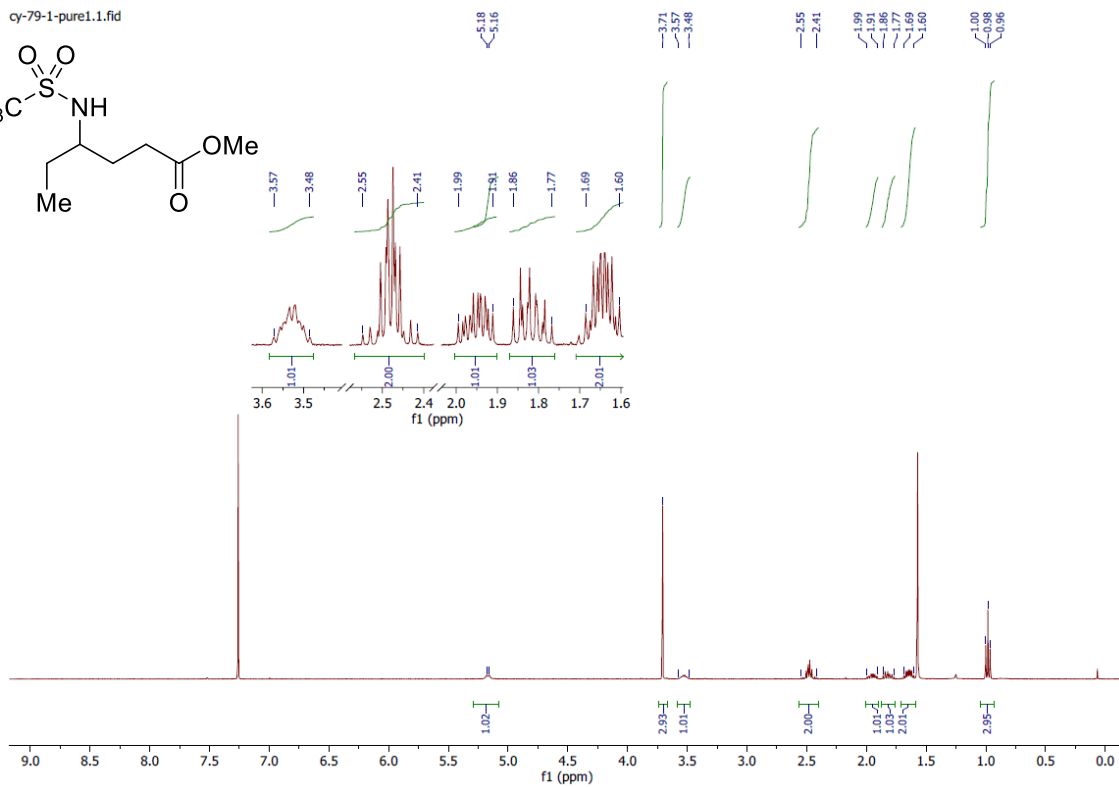

cy-79-1.12.fid

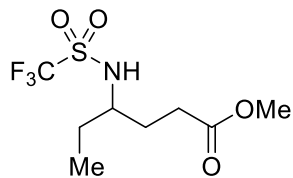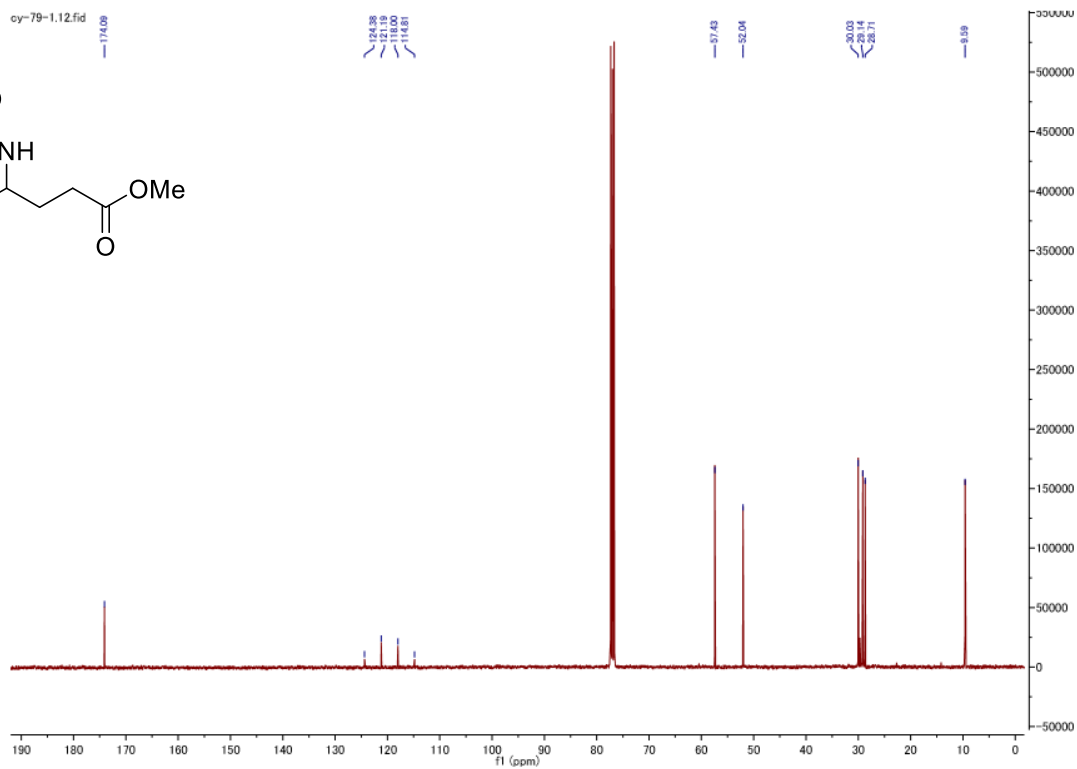

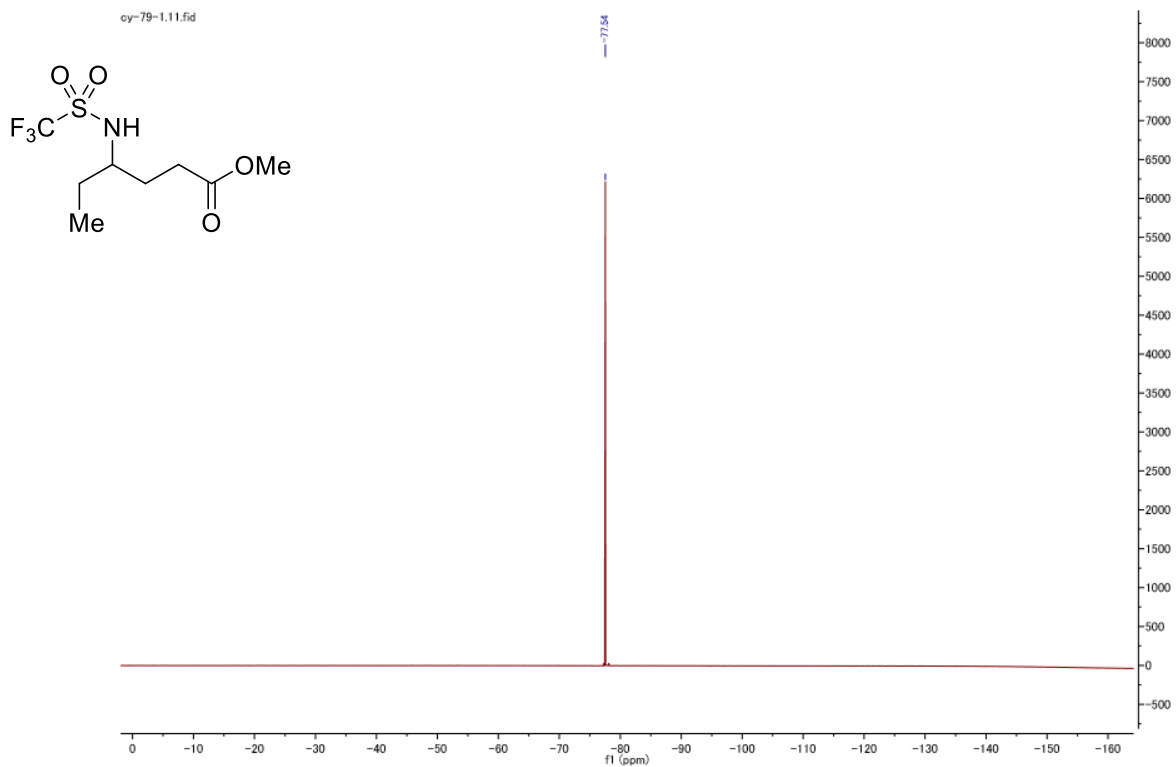

**benzyl 4-((trifluoromethyl)sulfonamido)hexanoate (3ad)**

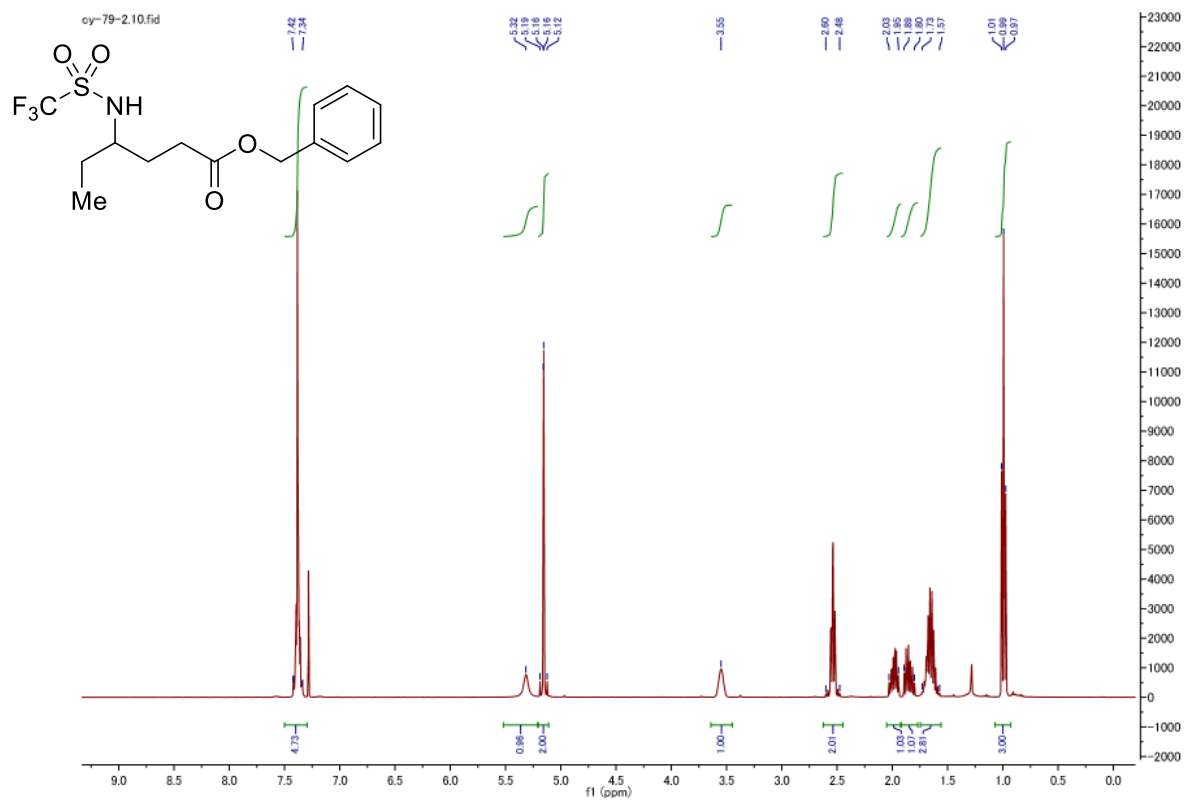

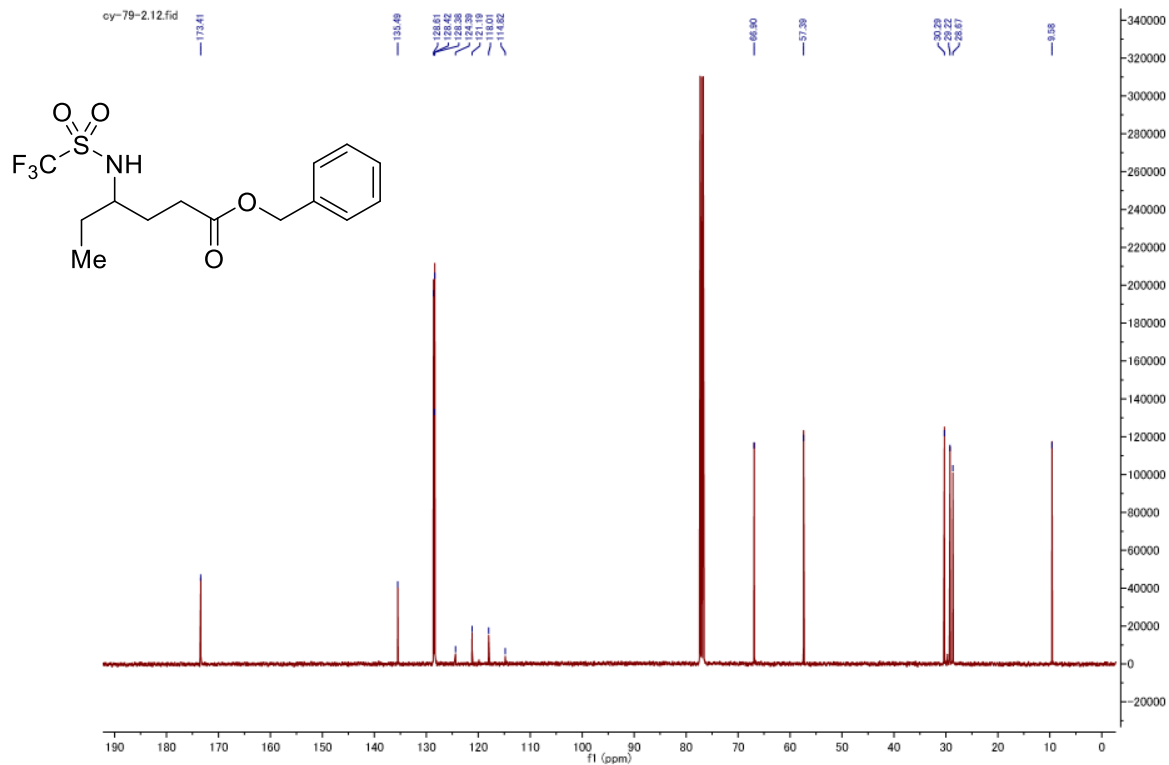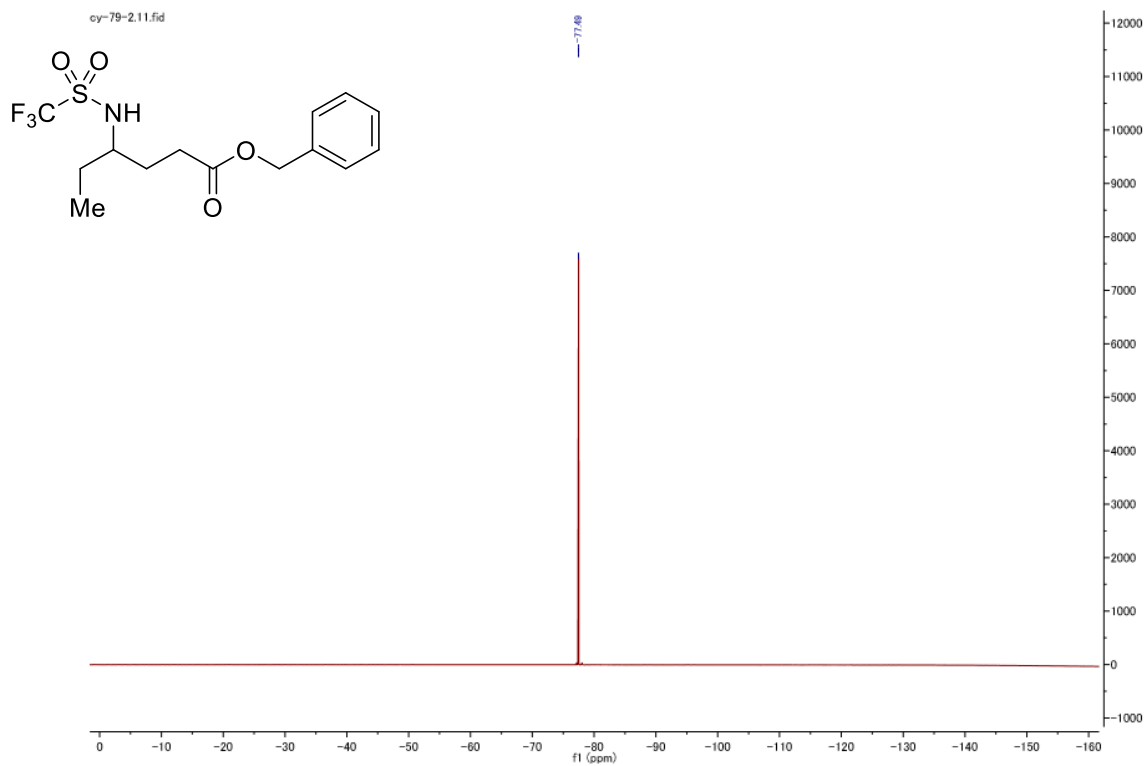

methyl 2-methyl-4-((trifluoromethyl)sulfonamido)hexanoate (3ae)

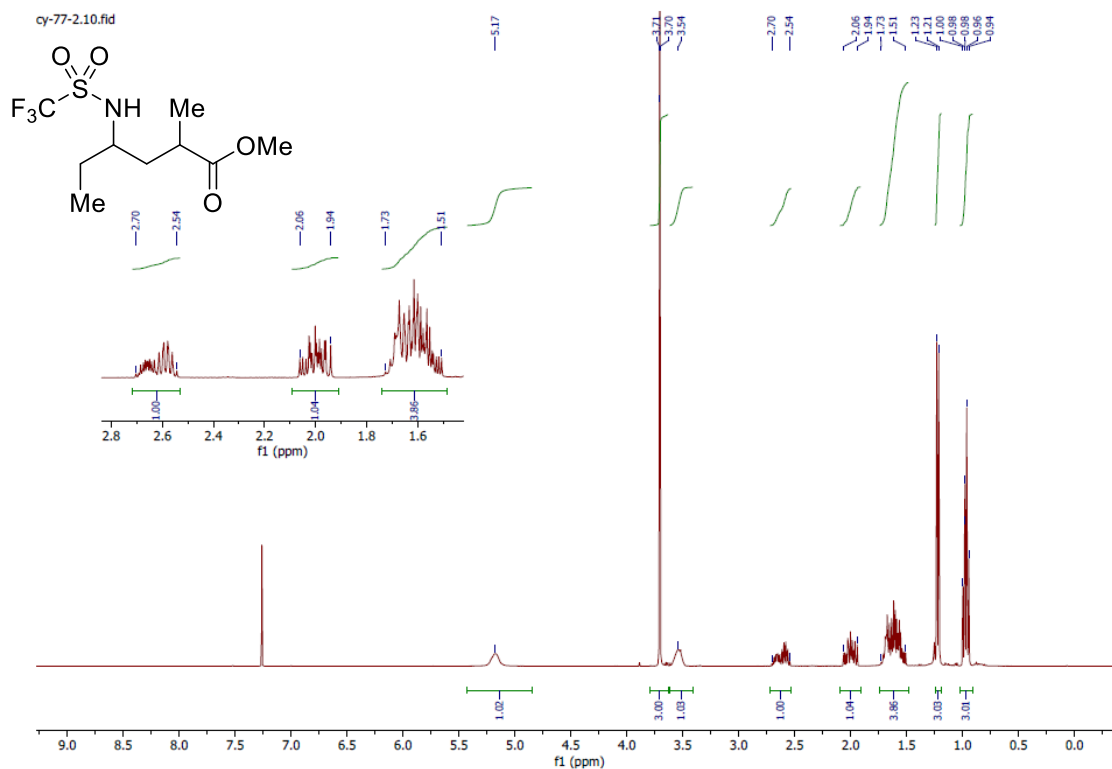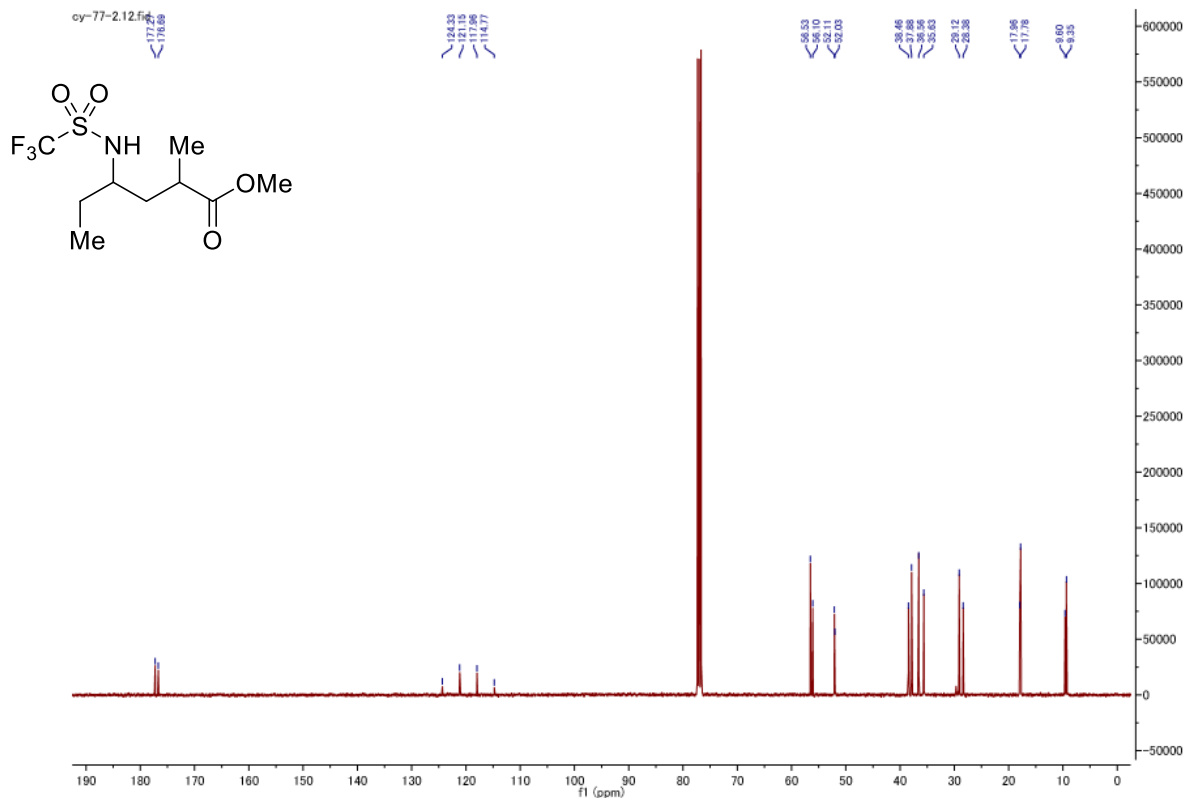

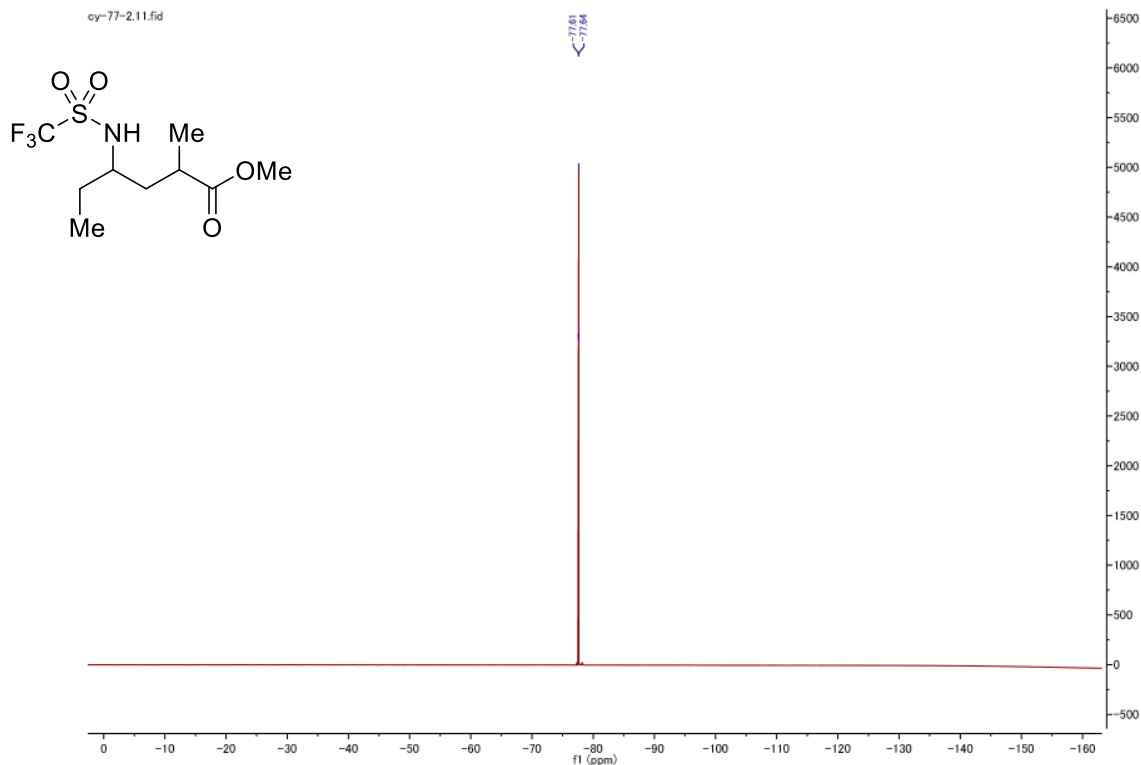

**ethyl 3-methyl-4-((trifluoromethyl)sulfonamido)hexanoate (3af)**

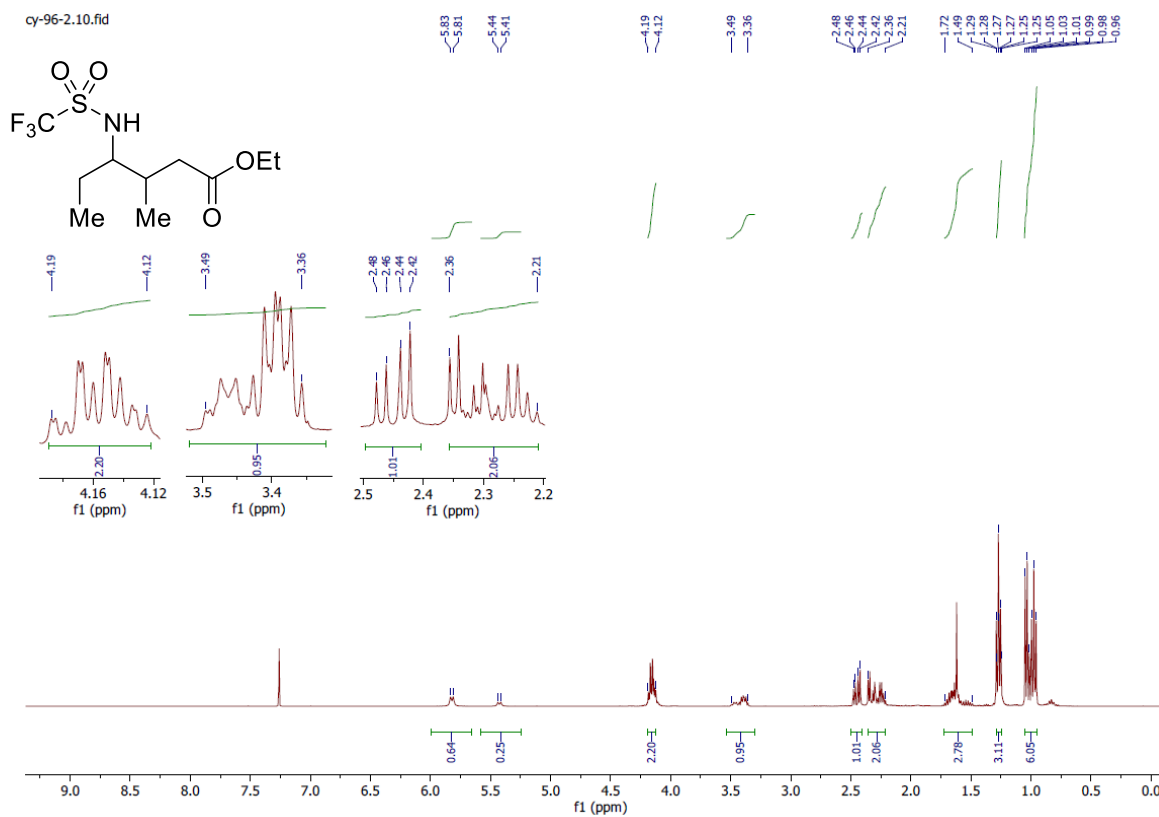

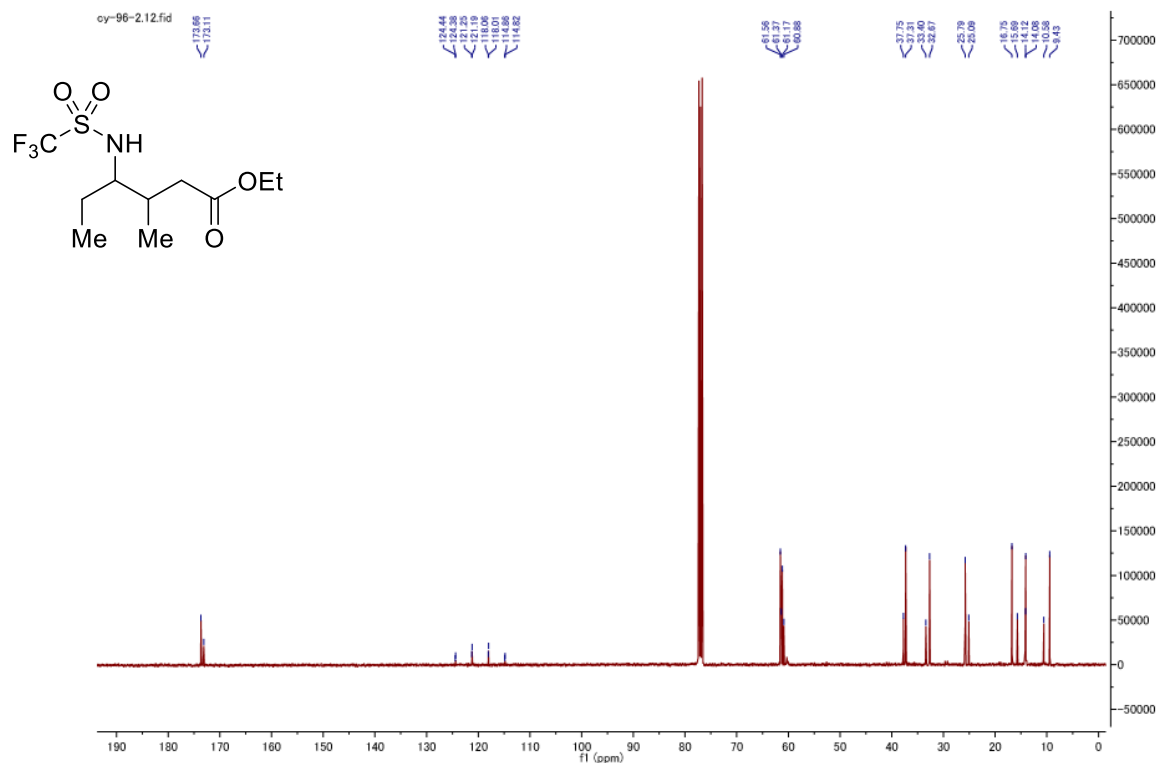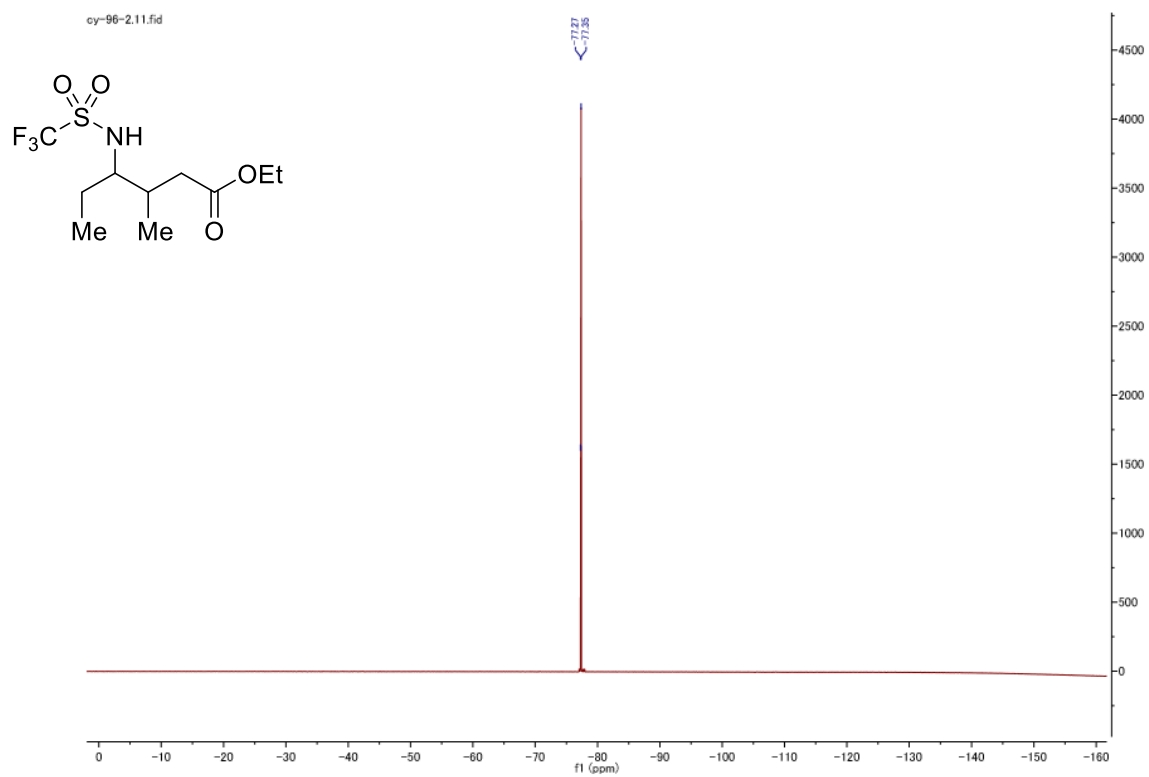





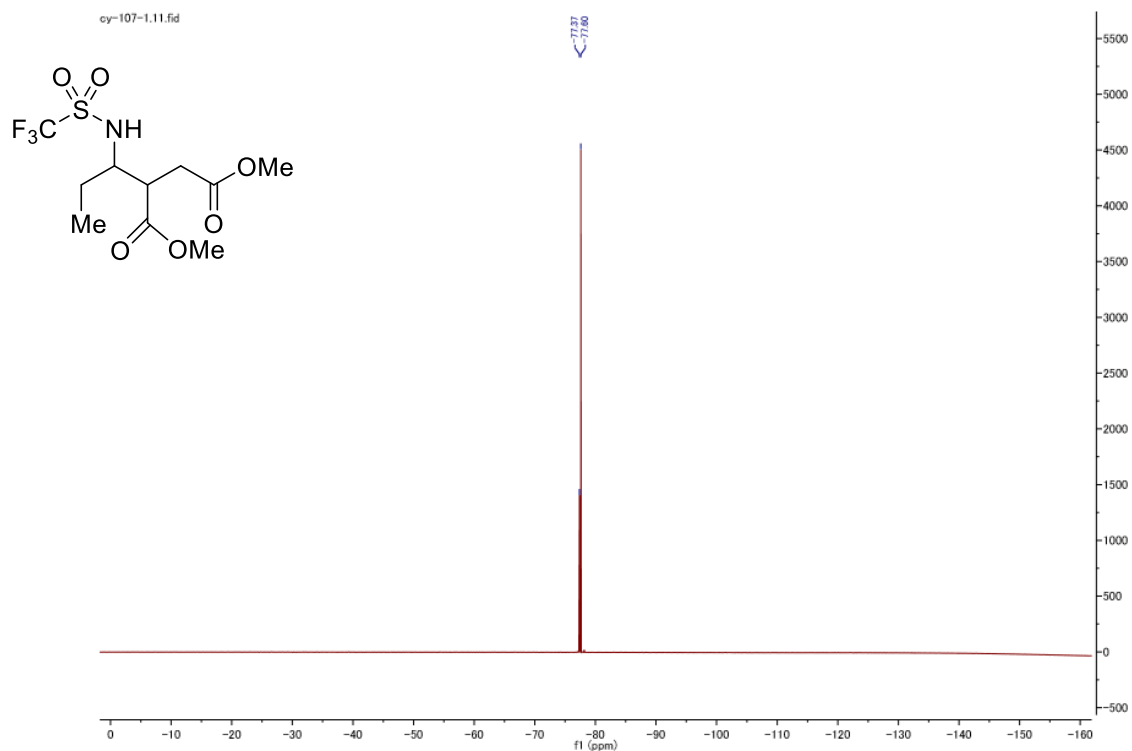

**1,1,1-trifluoro-N-(6-oxoheptan-3-yl)methanesulfonamide (3ah)**

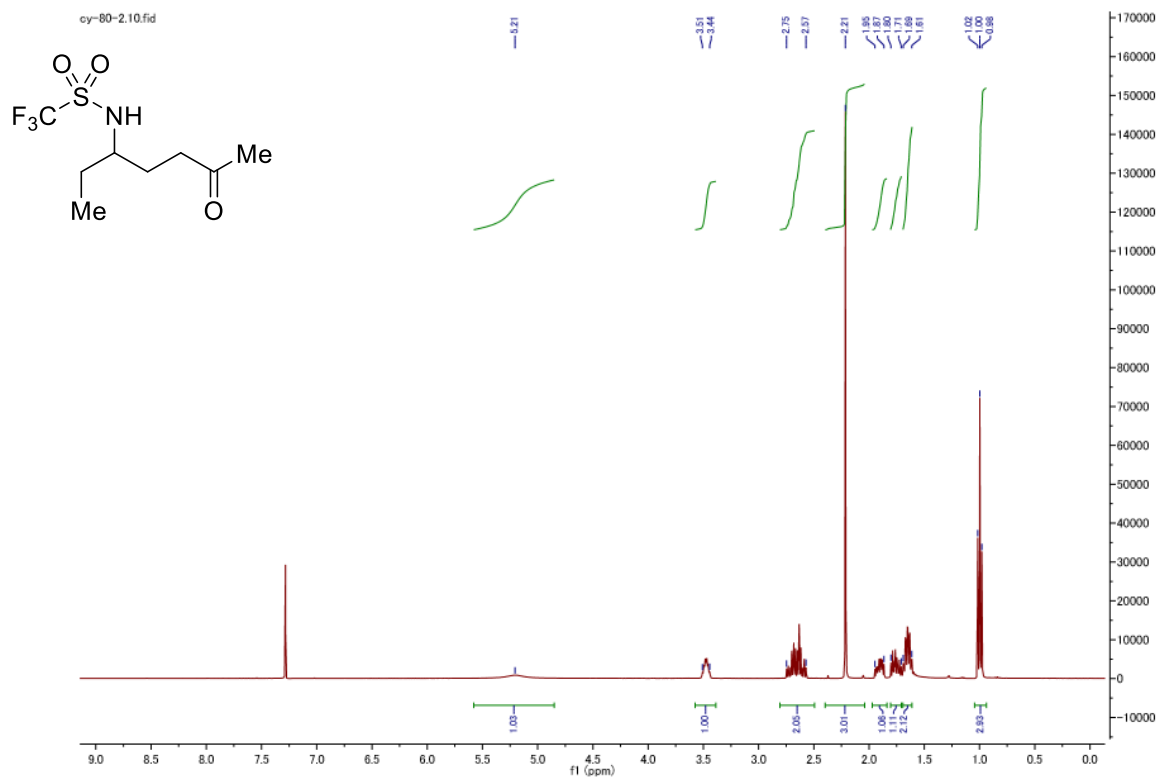

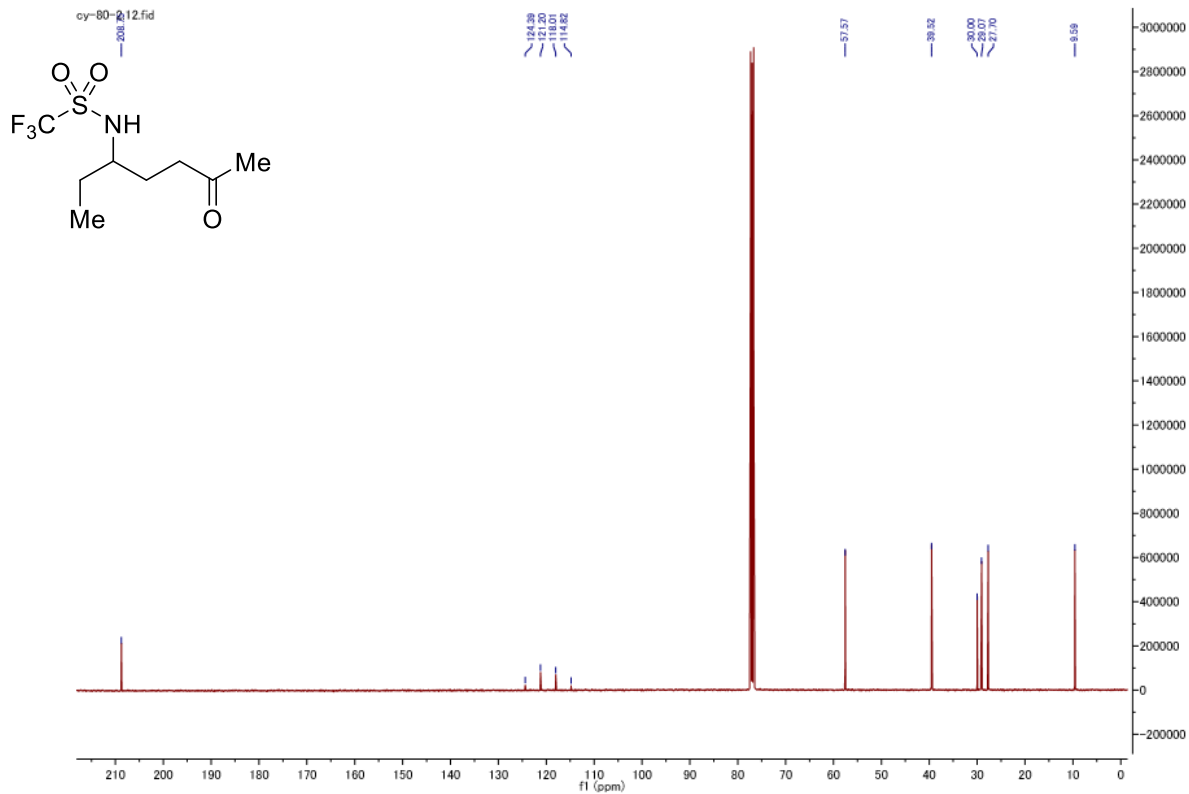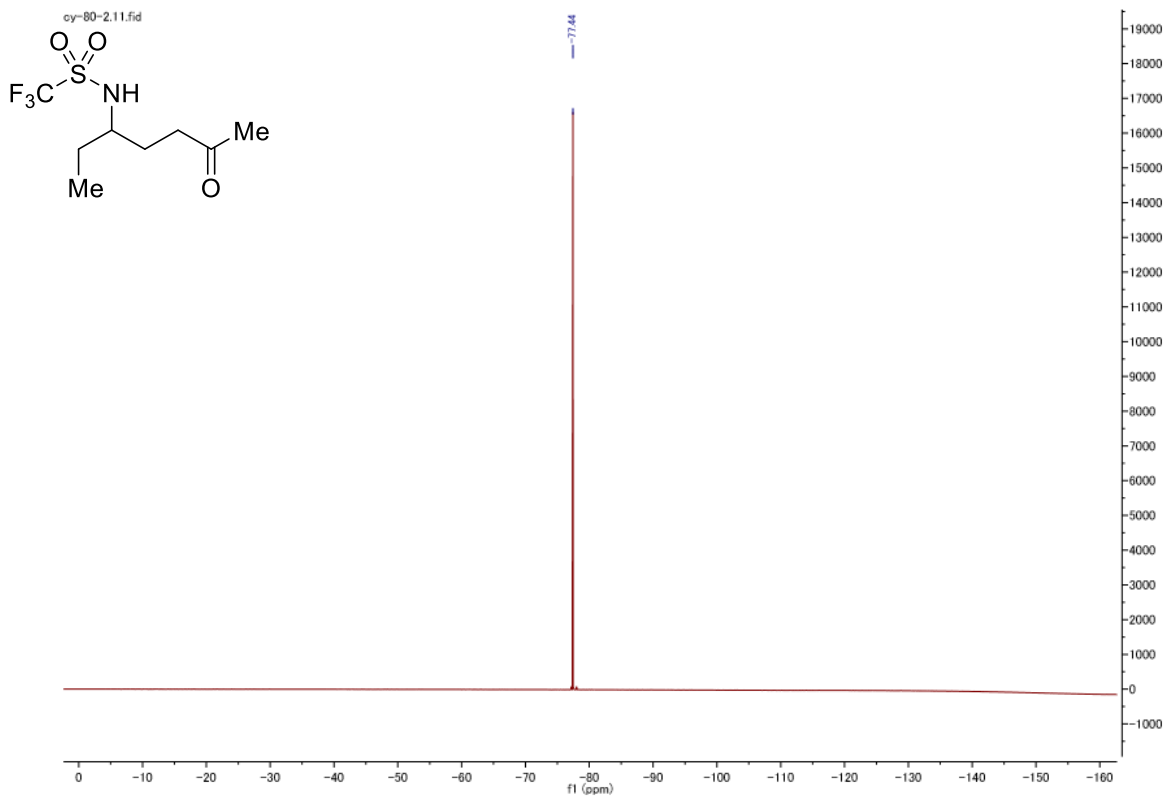

# 1,1,1-trifluoro-N-(1-(3-oxocyclopentyl)propyl)methanesulfonamide (3ai)

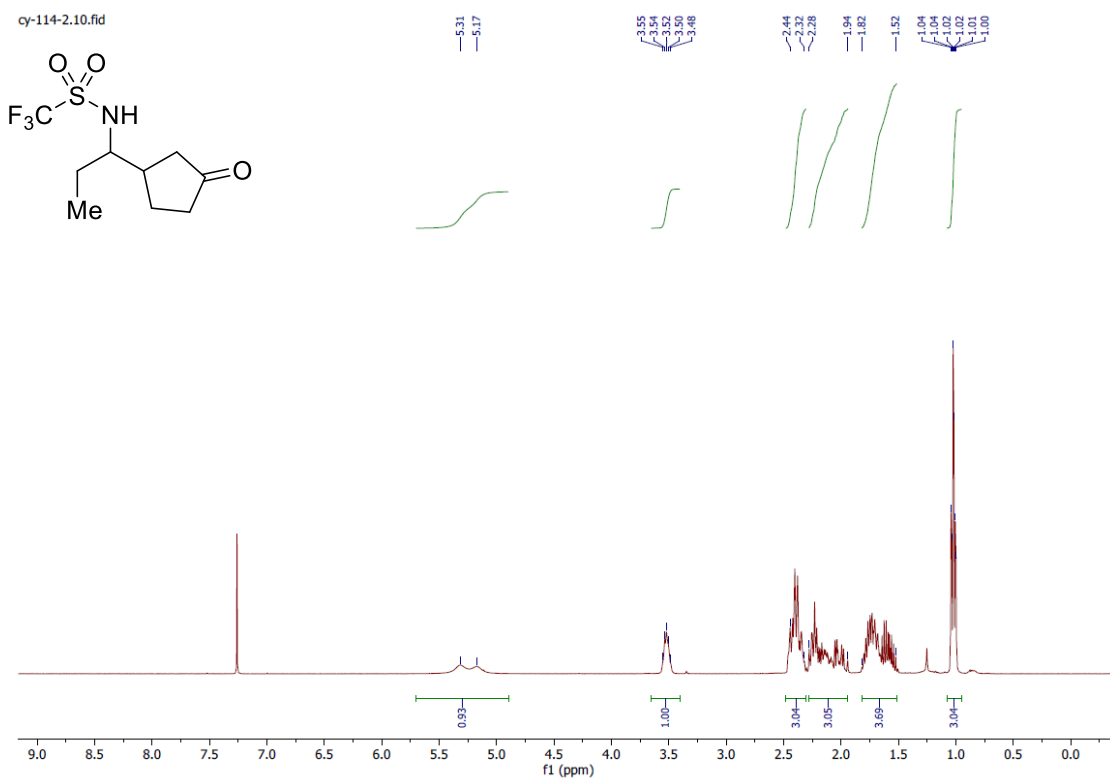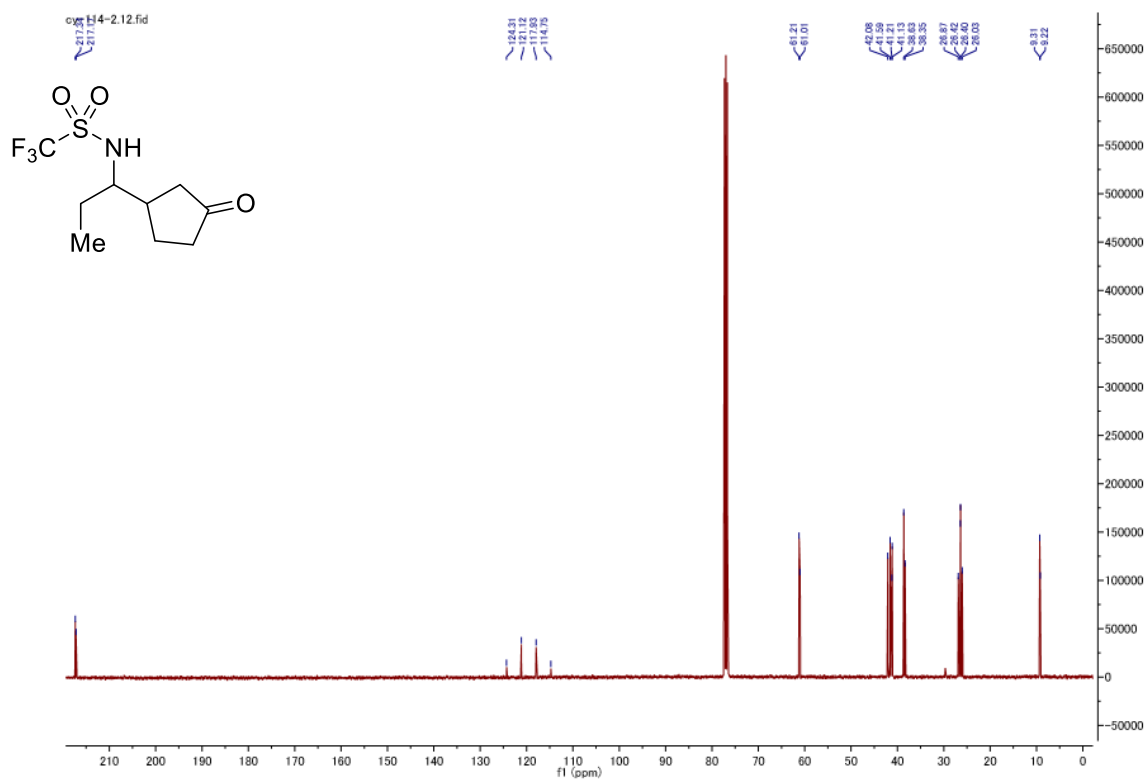

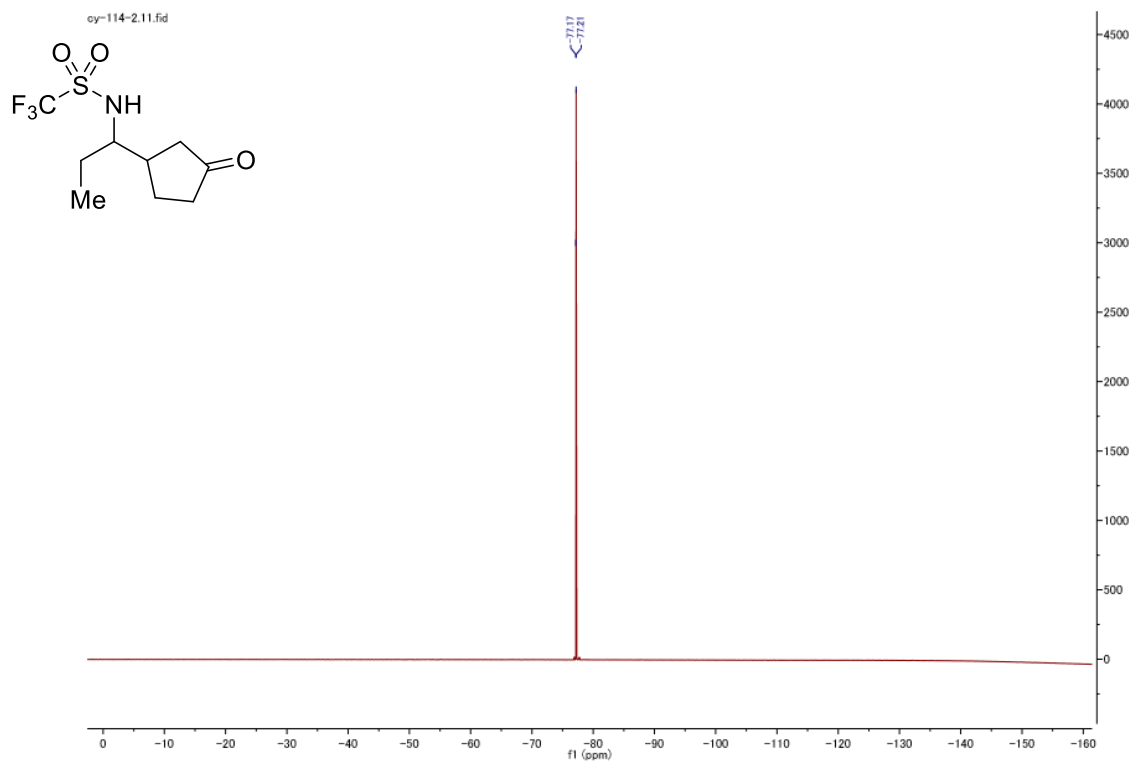

**1,1,1-trifluoro-N-(1-(phenylsulfonyl)pentan-3-yl)methanesulfonamide (3aj)**

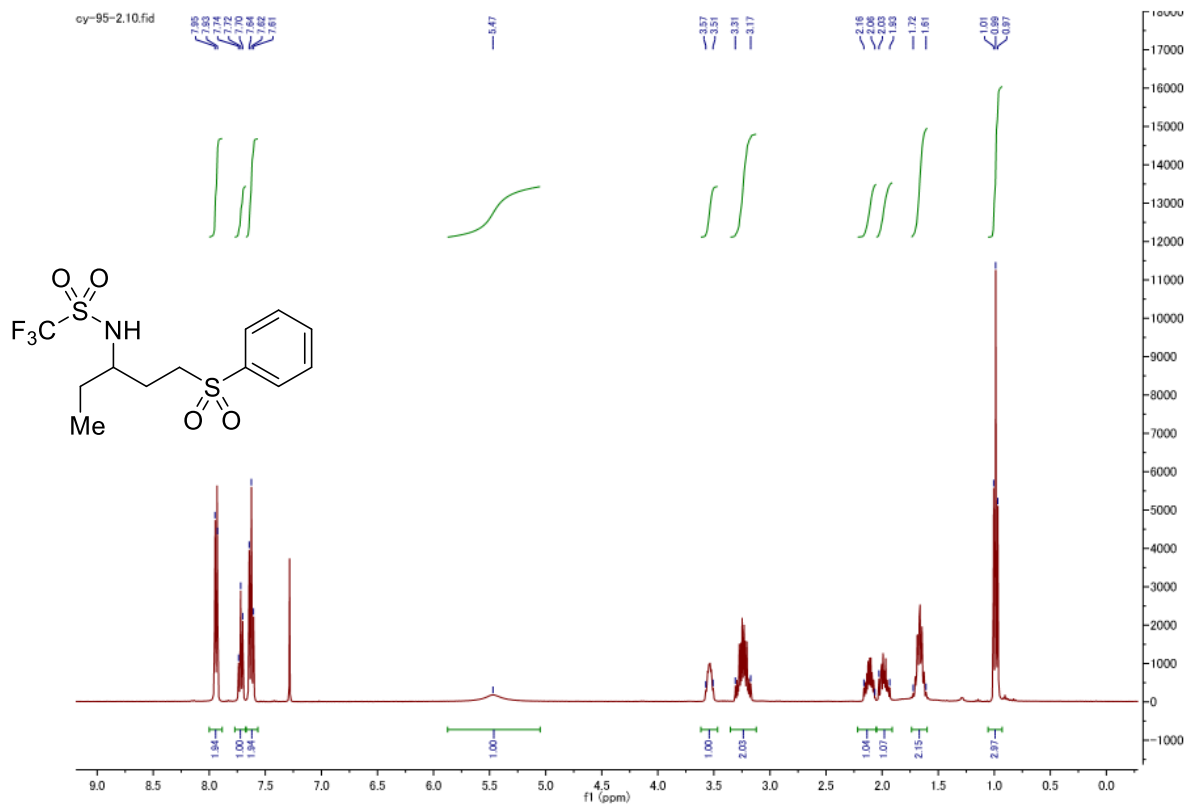

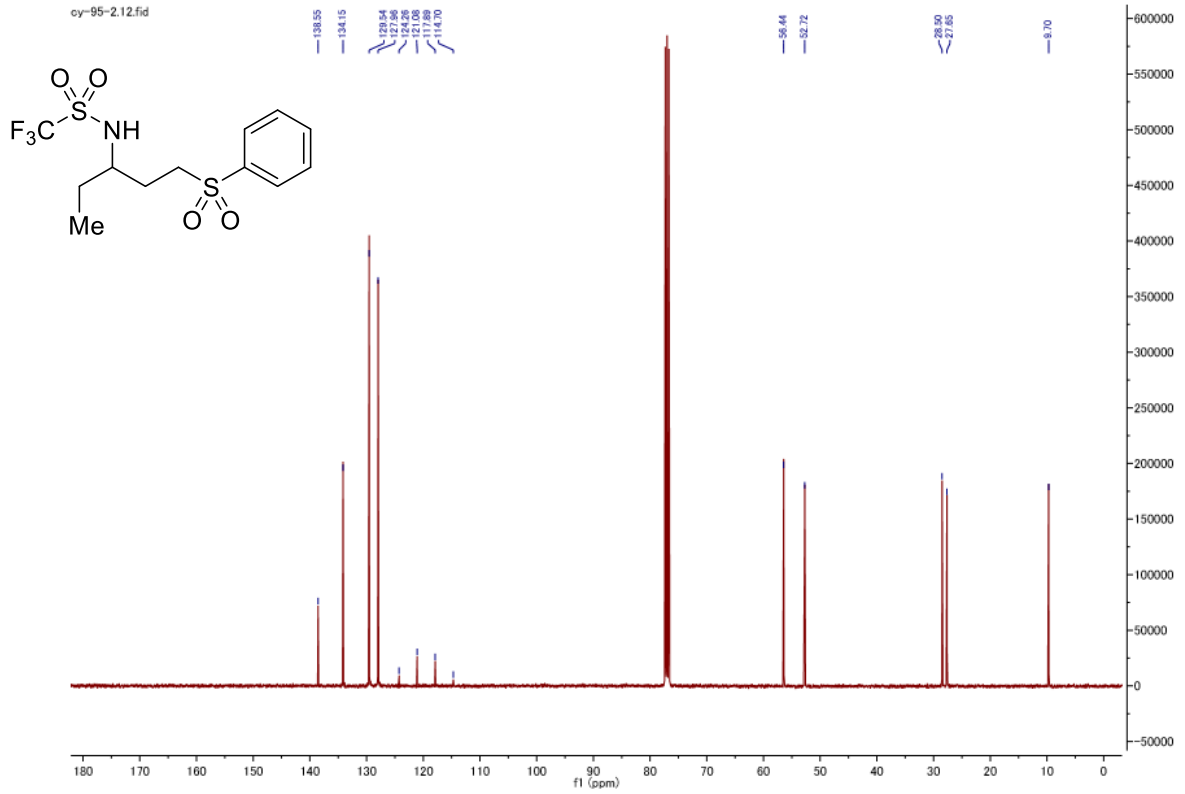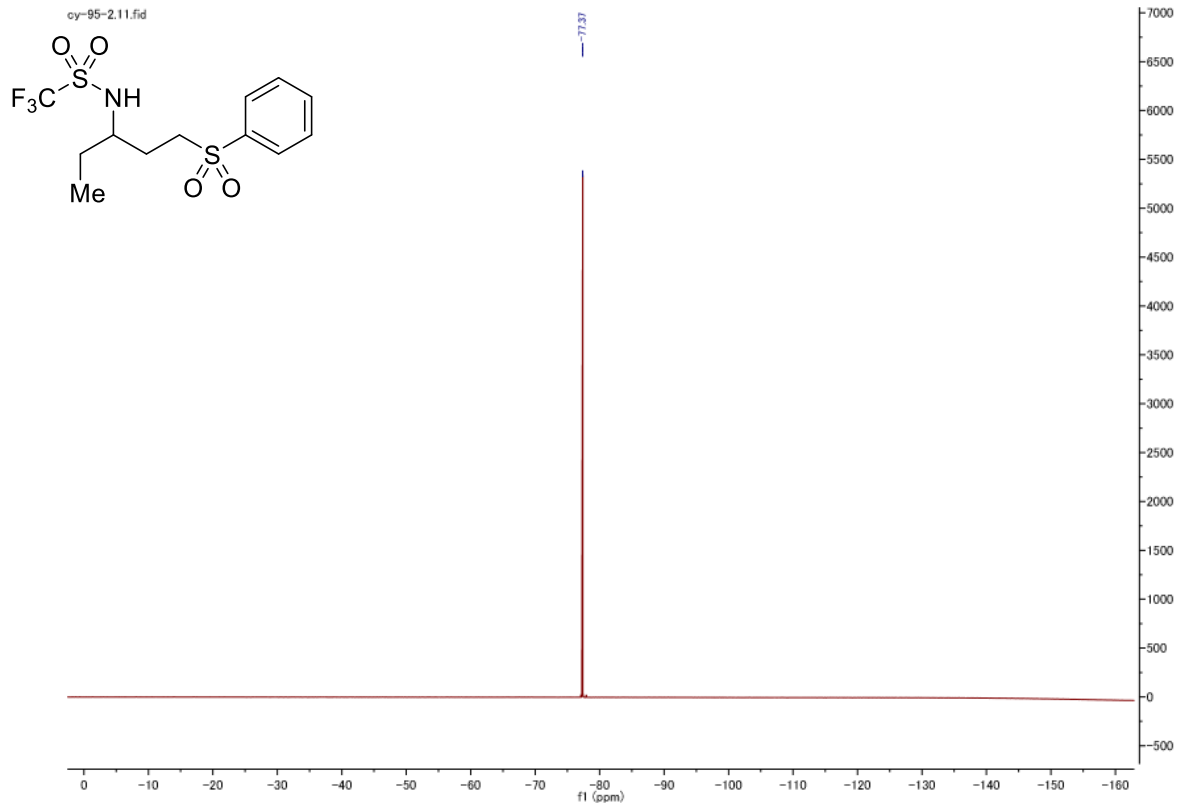

diethyl (3-((trifluoromethyl)sulfonamido)pentyl)phosphonate (3ak)

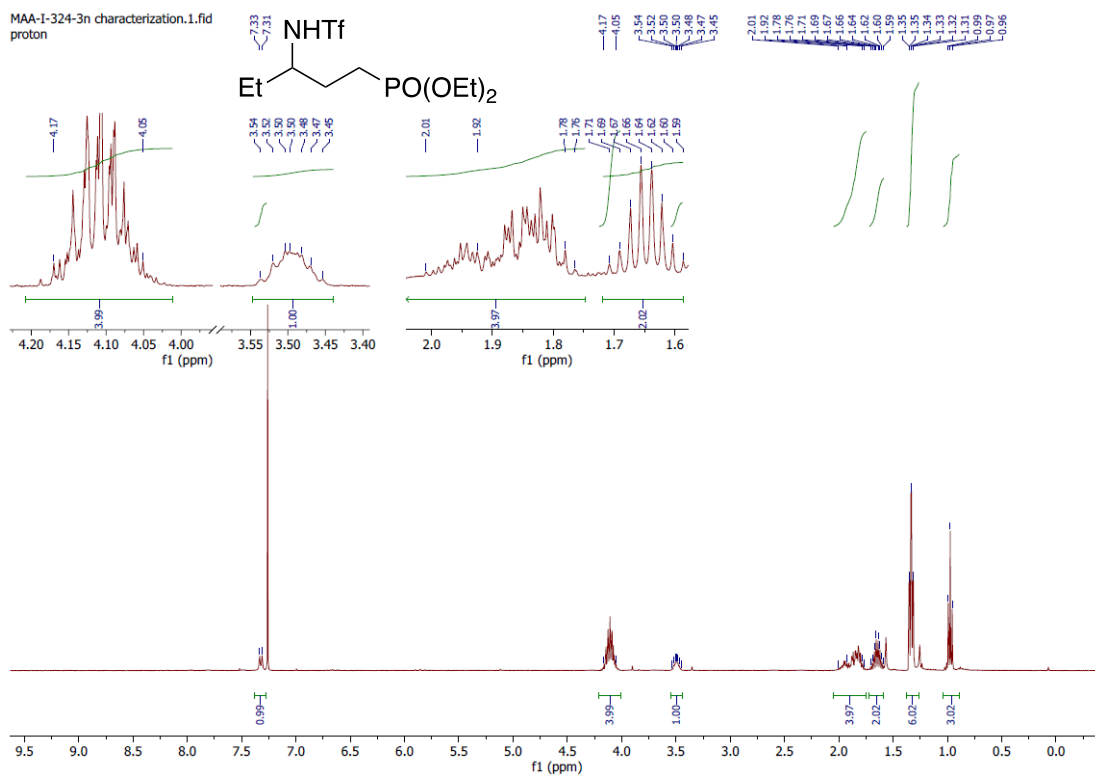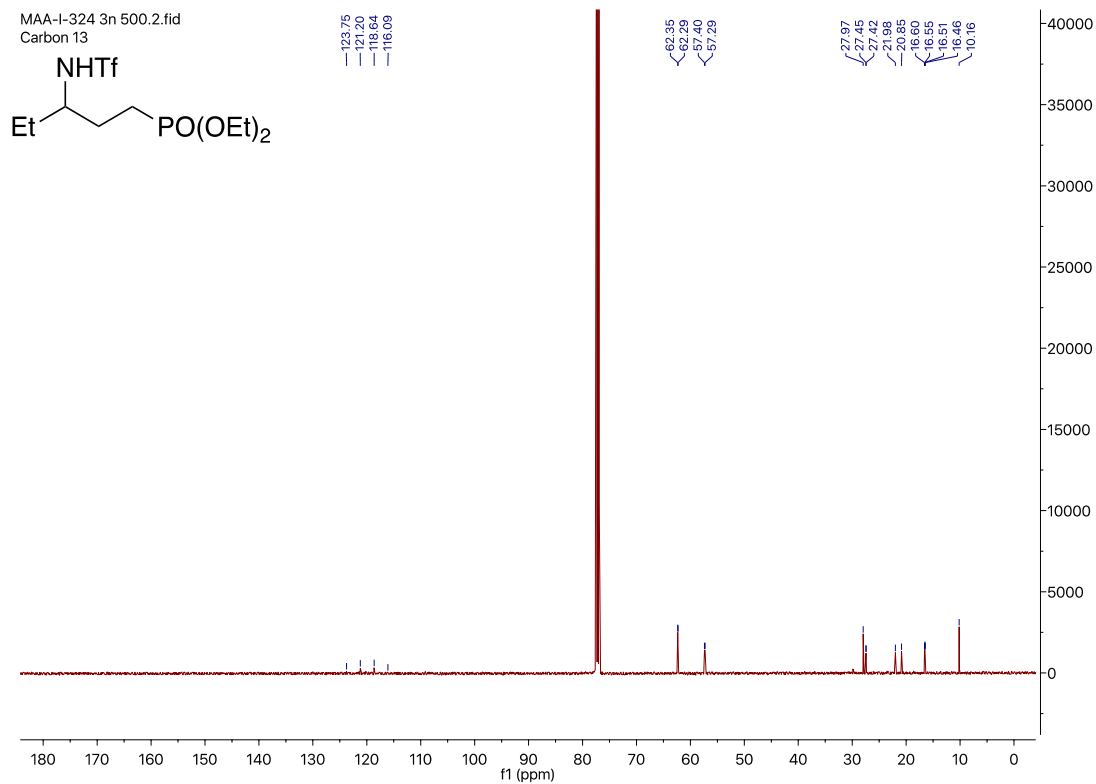

MAA-1-324-3n characterization.2.fid  
F19

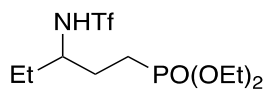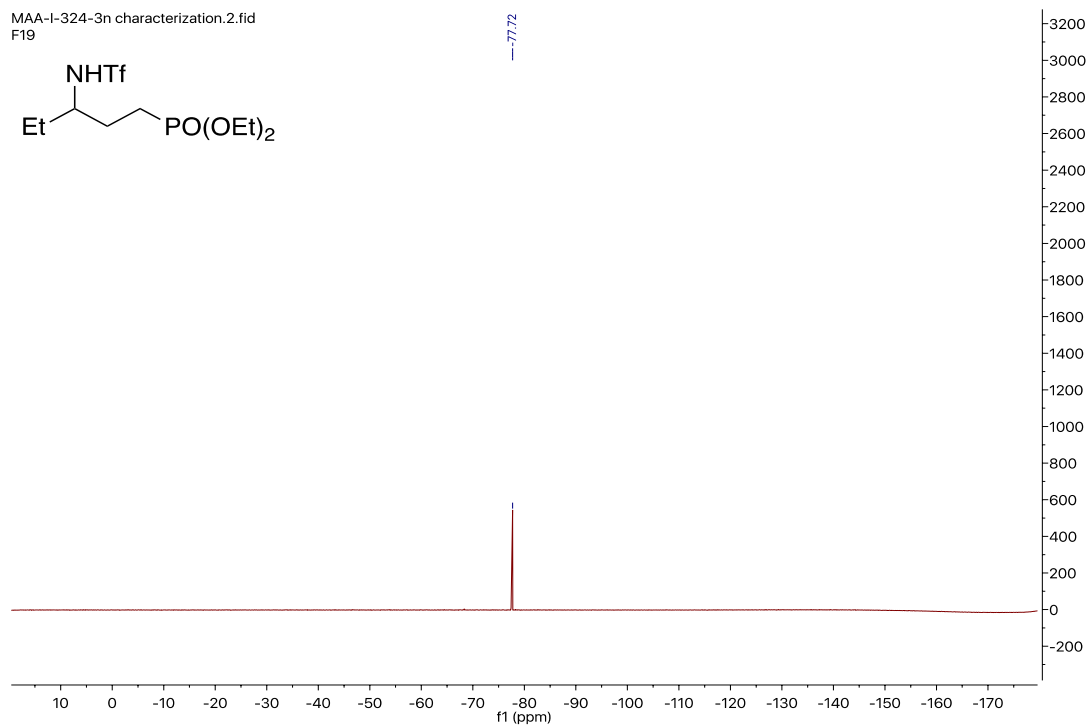

### *N*-(1-cyanopentan-3-yl)-1,1,1-trifluoromethanesulfonamide (3a)

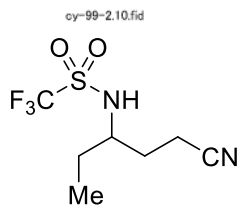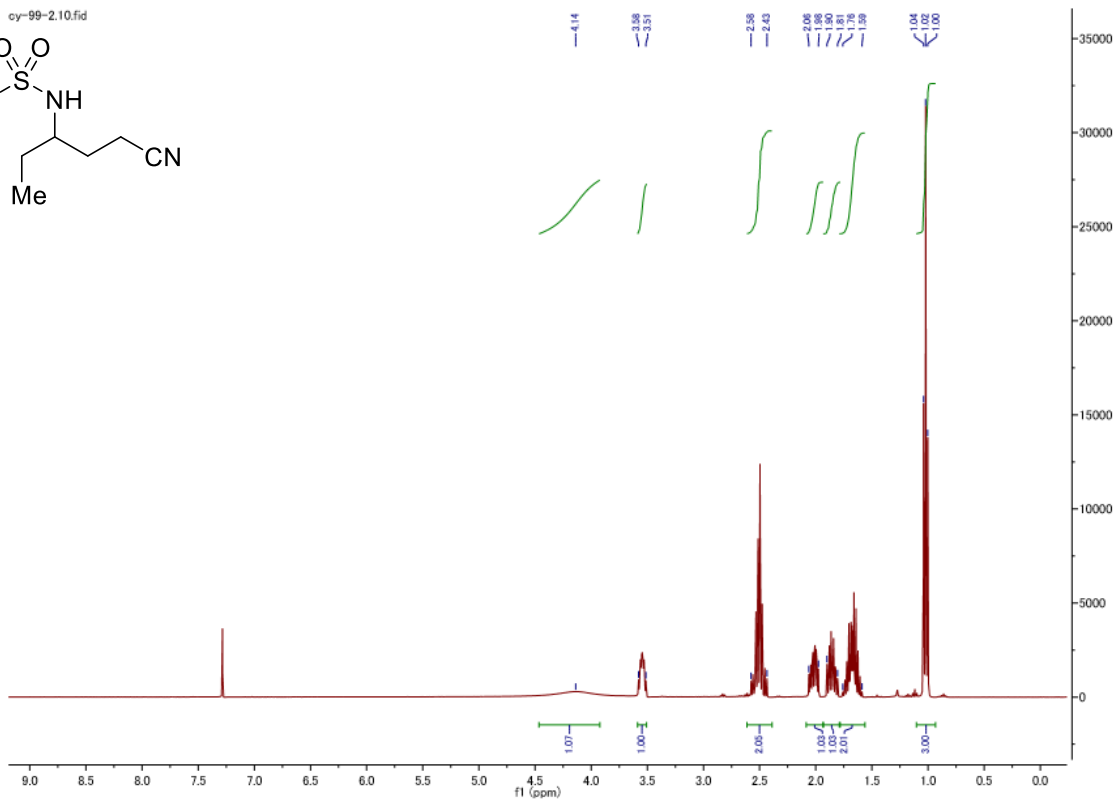

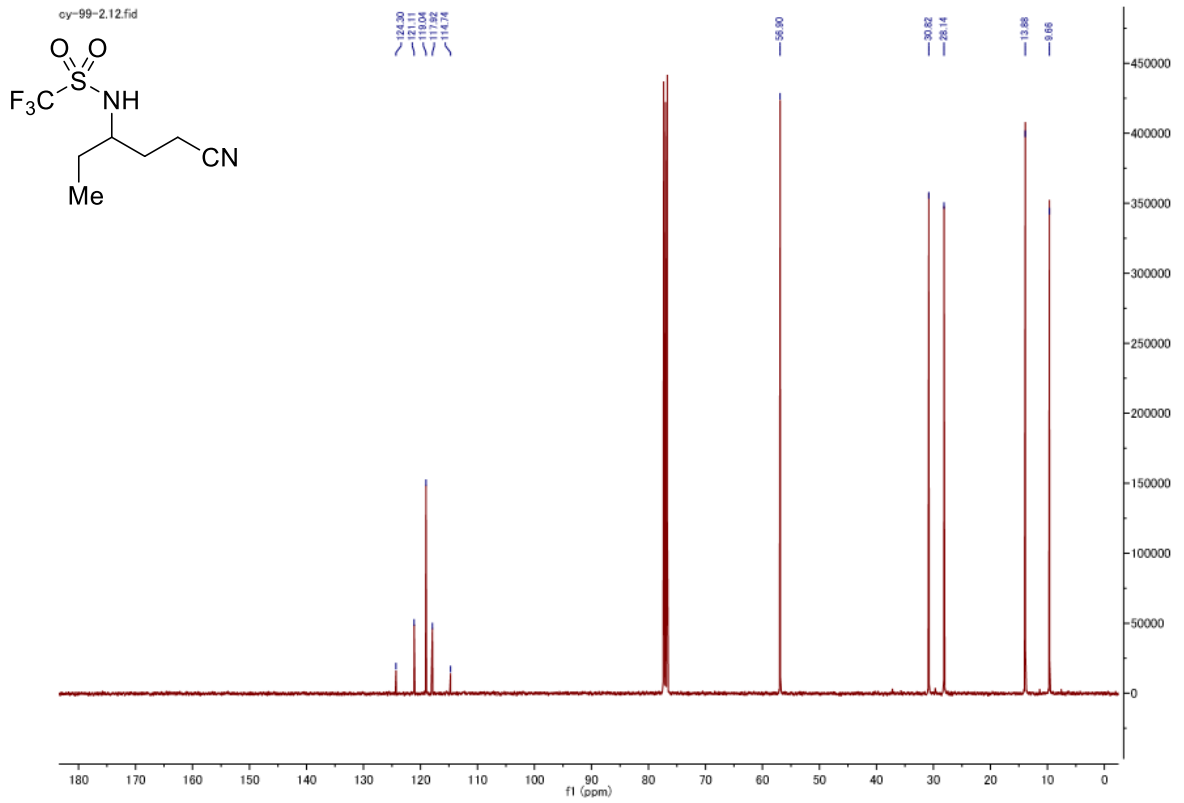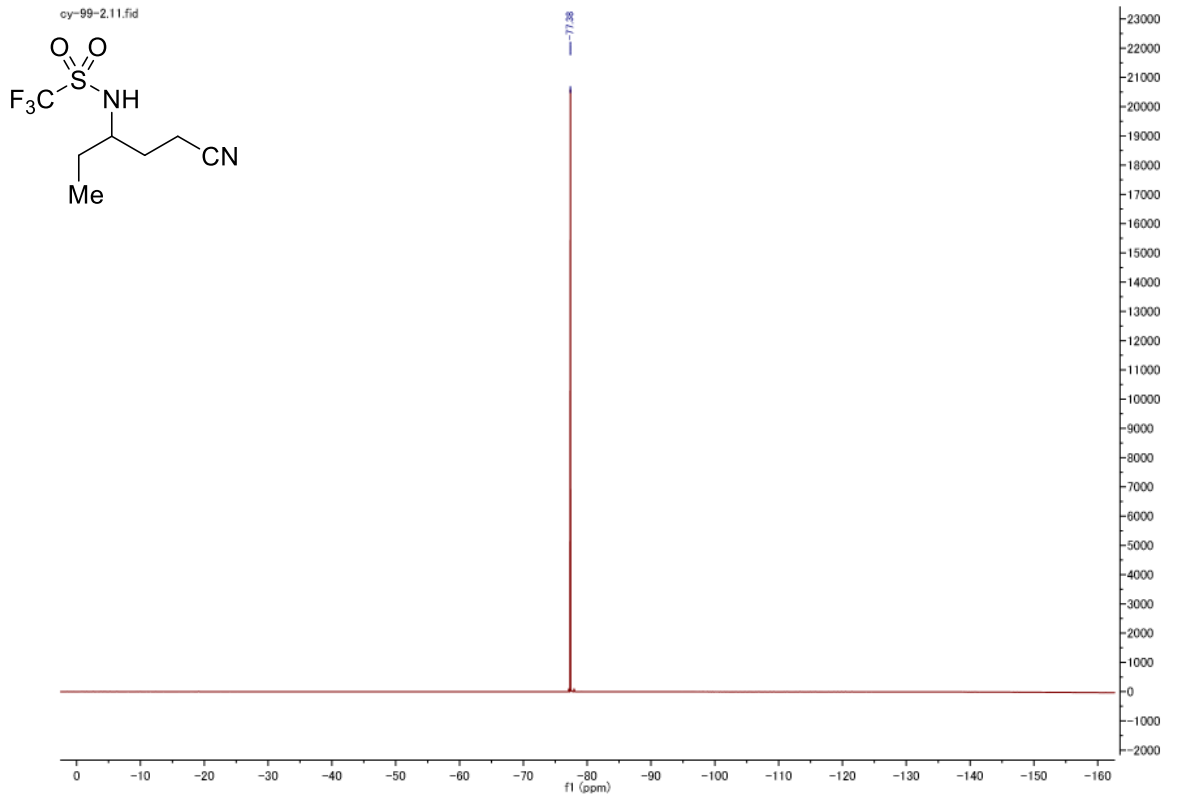



***N*-(5-cyanohexan-3-yl)-1,1,1-trifluoromethanesulfonamide (3am)**

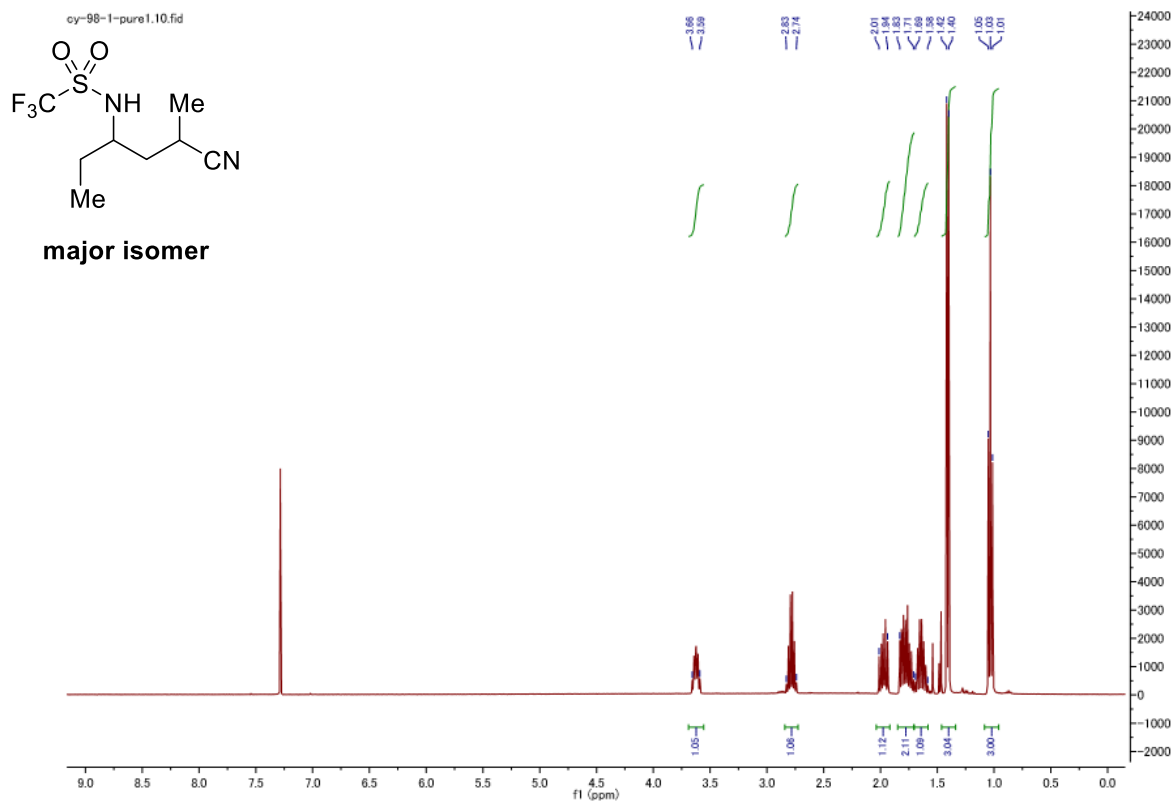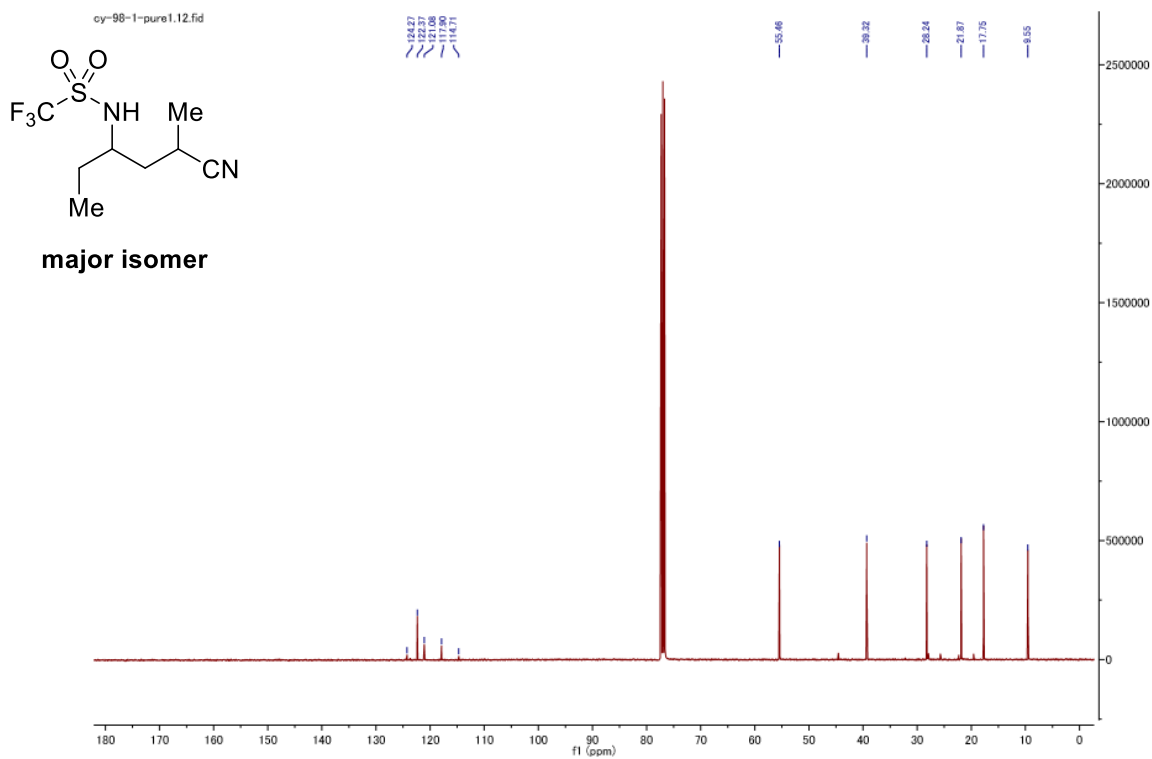

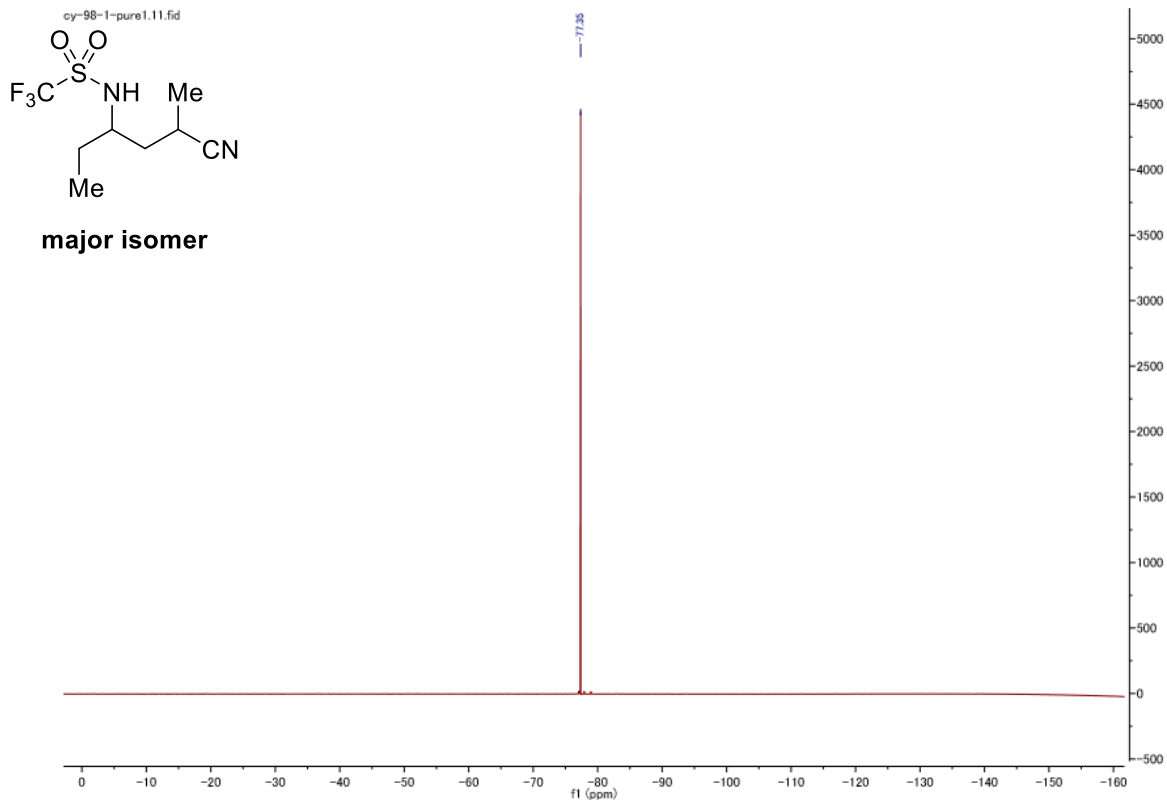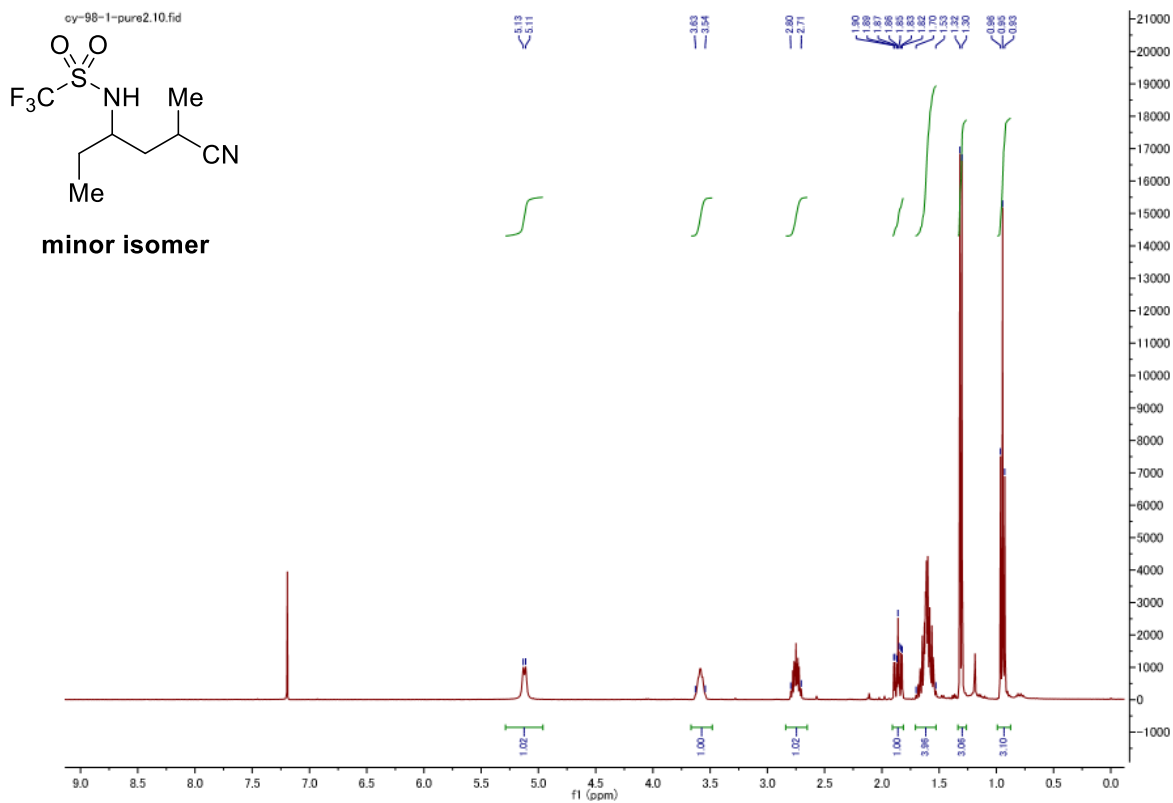

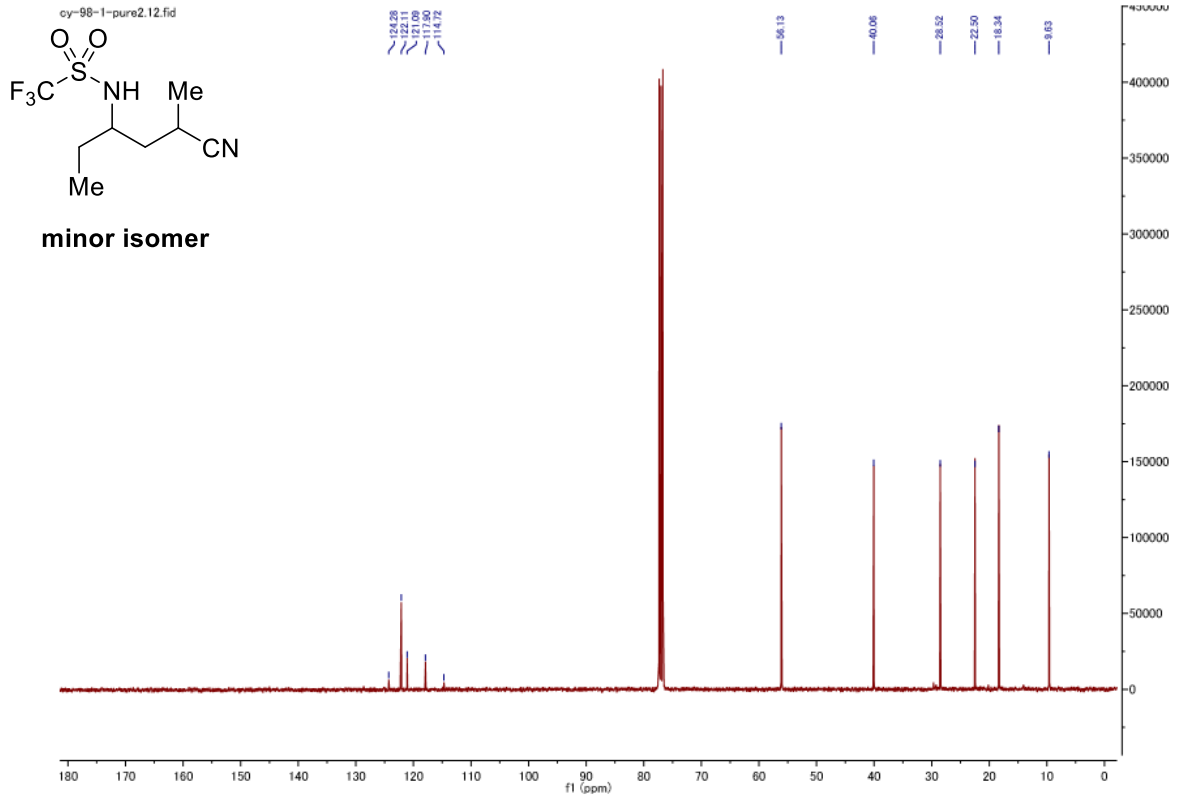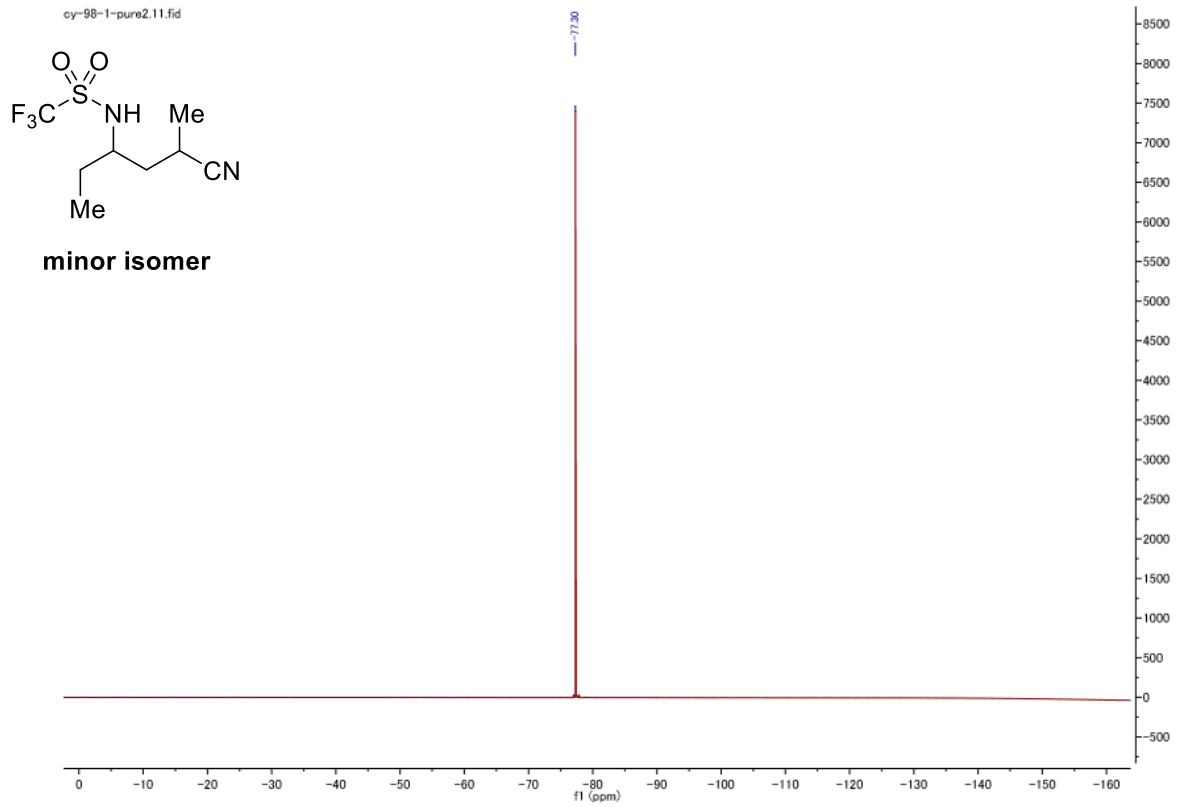

***N,N*-dimethyl-4-((trifluoromethyl)sulfonamido)hexanamide (3an)**

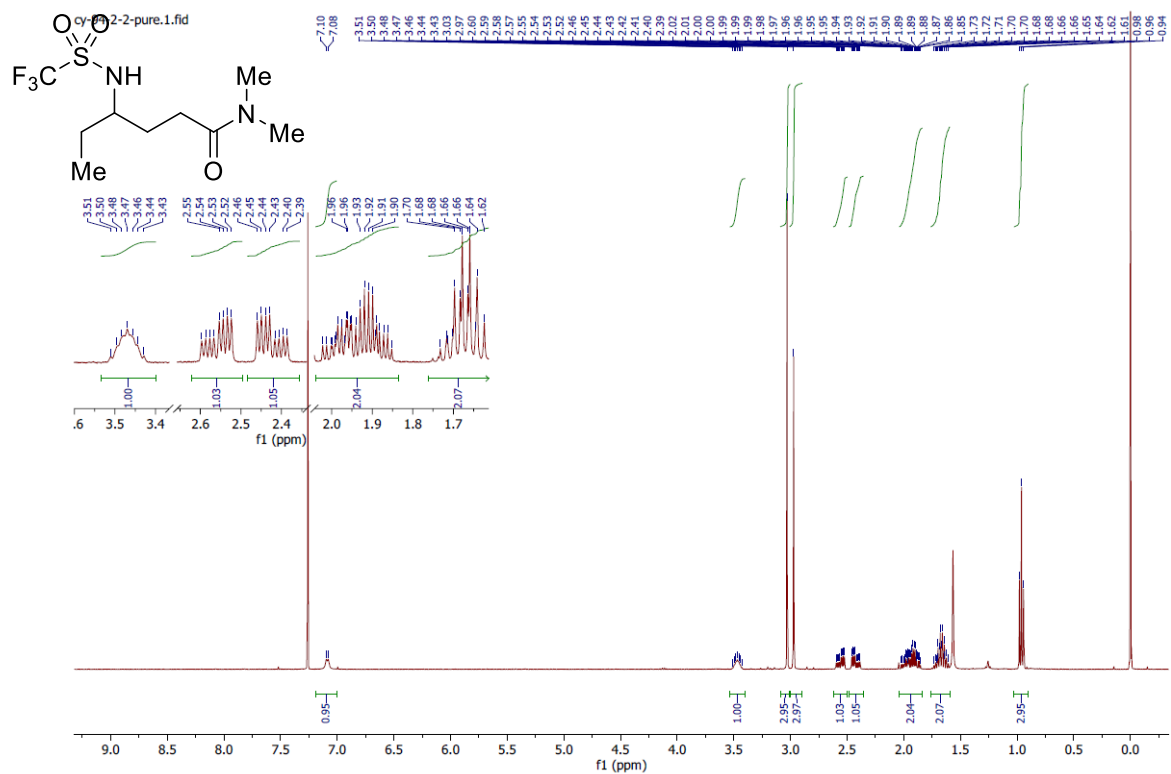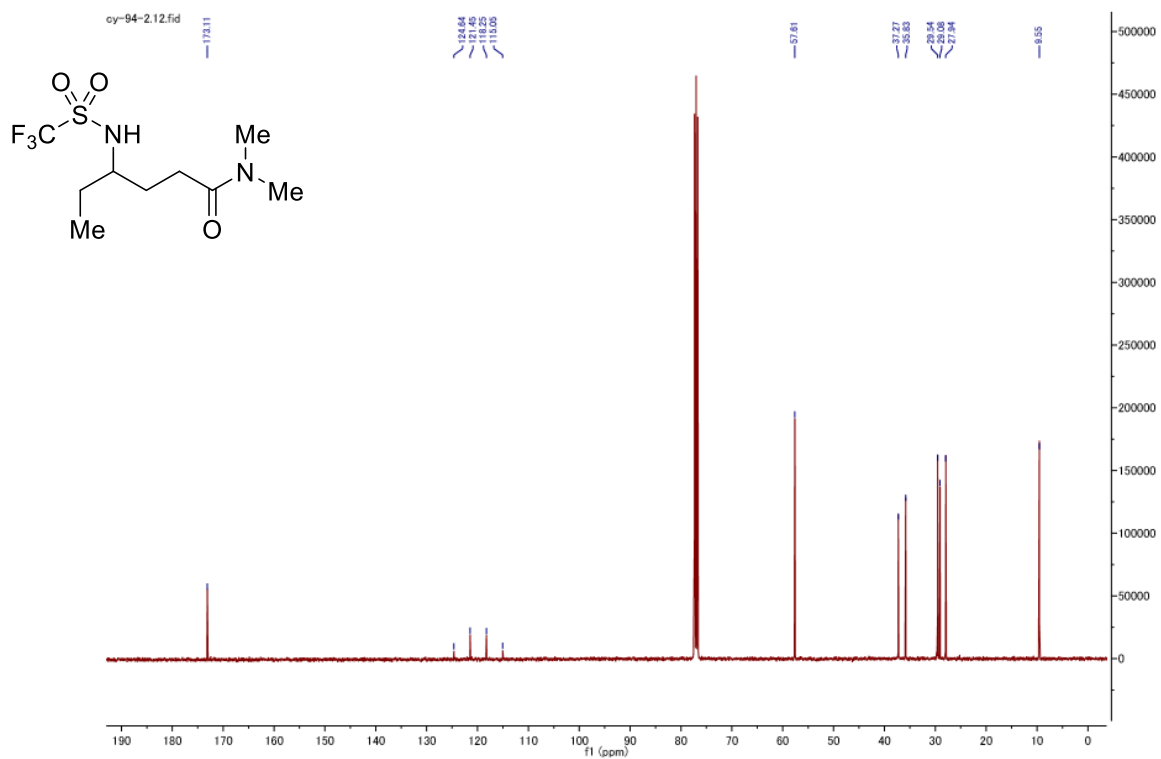

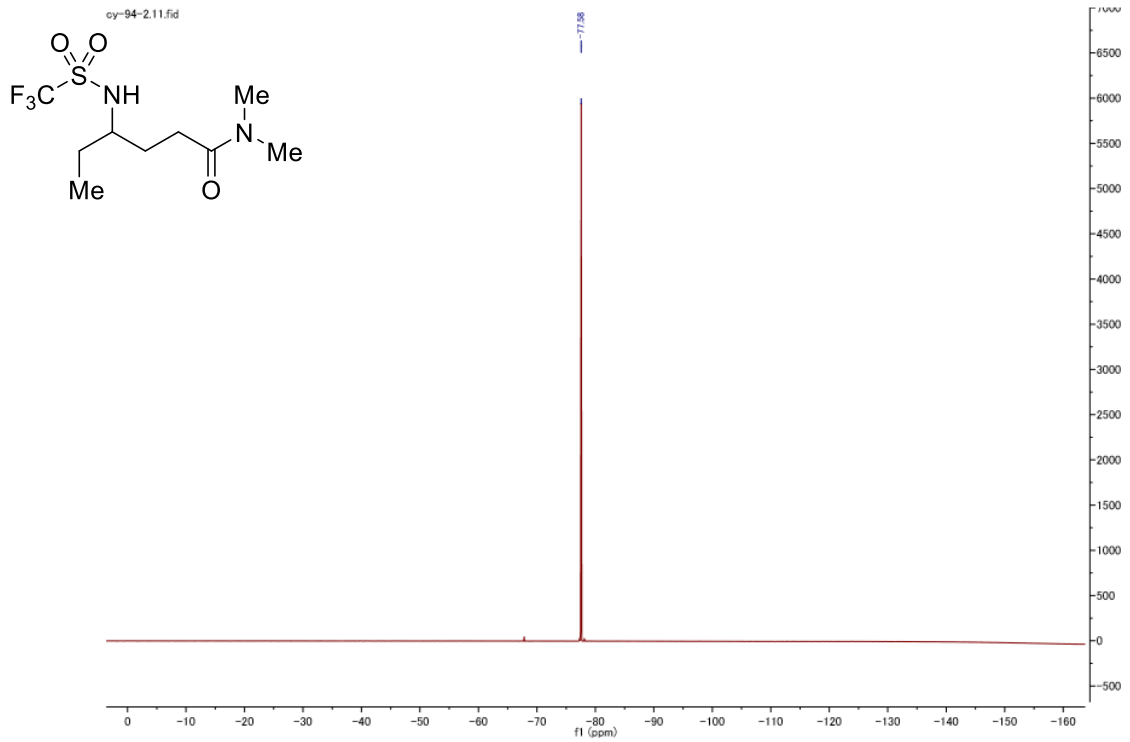

***N*-(1,1-diphenylpentan-3-yl)-1,1,1-trifluoromethanesulfonamide (3a)**

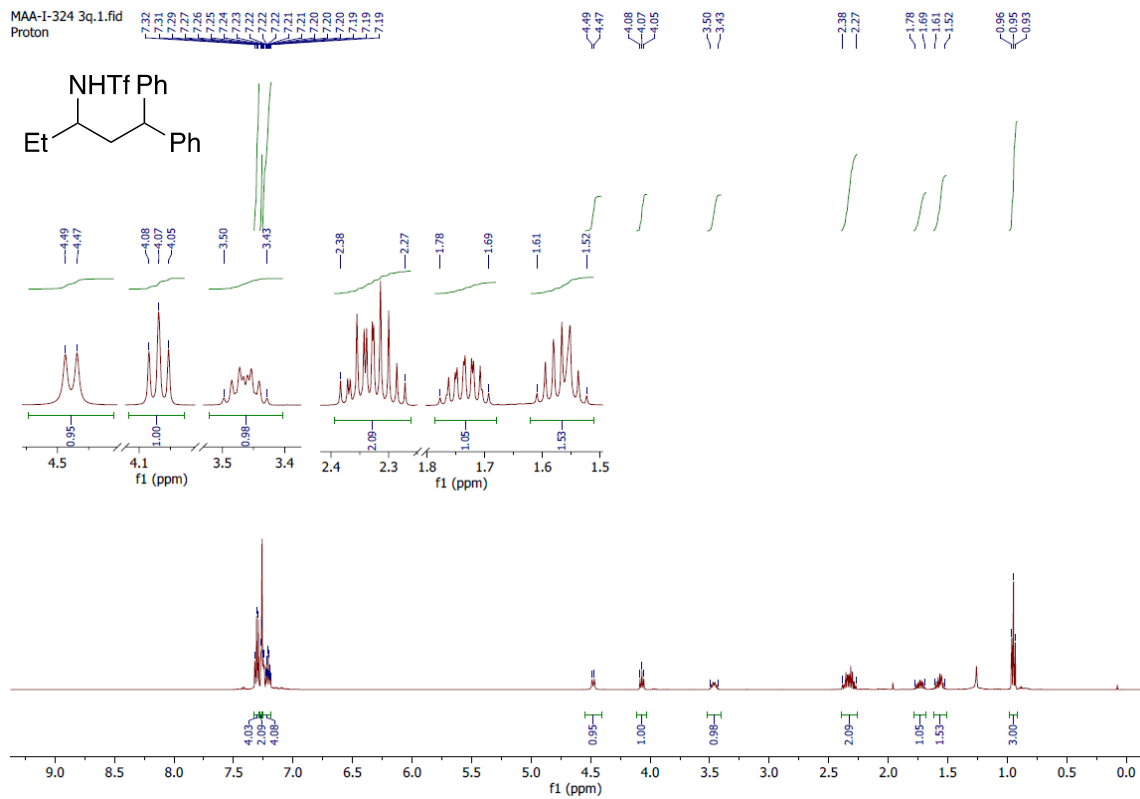

MAA-I-324 3q.4.fid  
Carbon 13

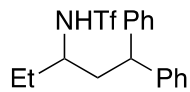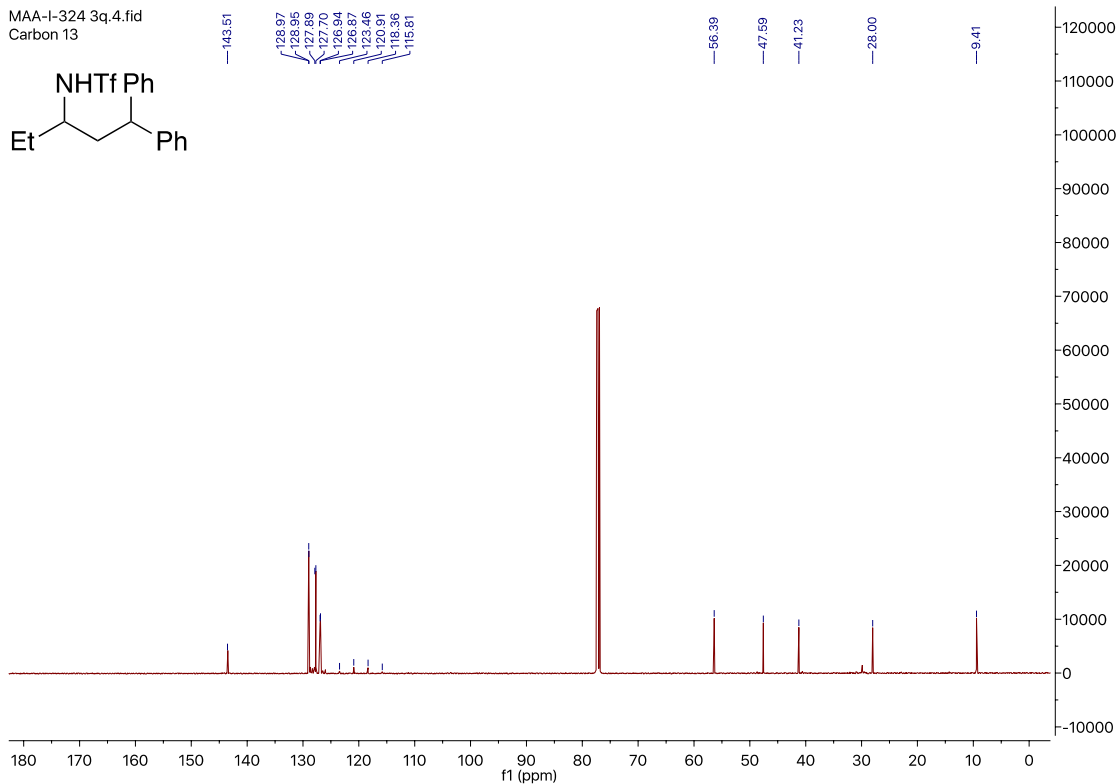

MAA-I-324 3q.2.fid  
19F

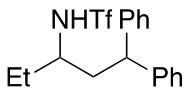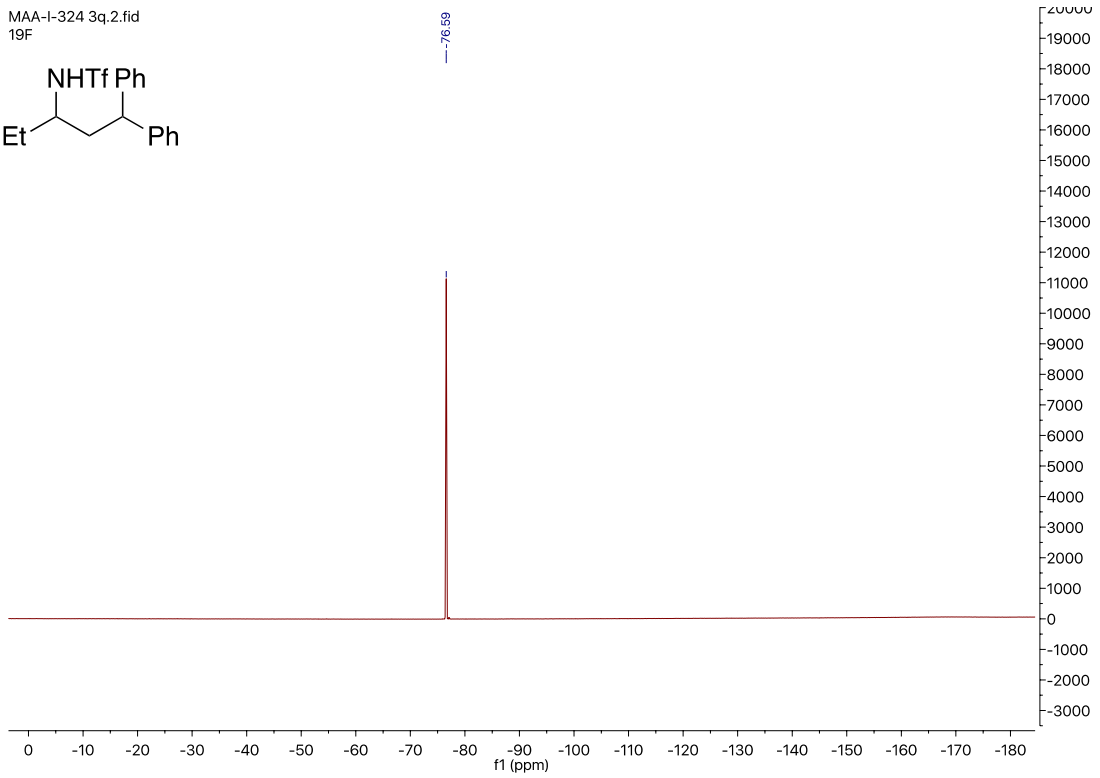

**1,1,1-trifluoro-N-(1-(4-(trifluoromethyl)phenyl)pentan-3-yl)methanesulfonamide (3ap)**

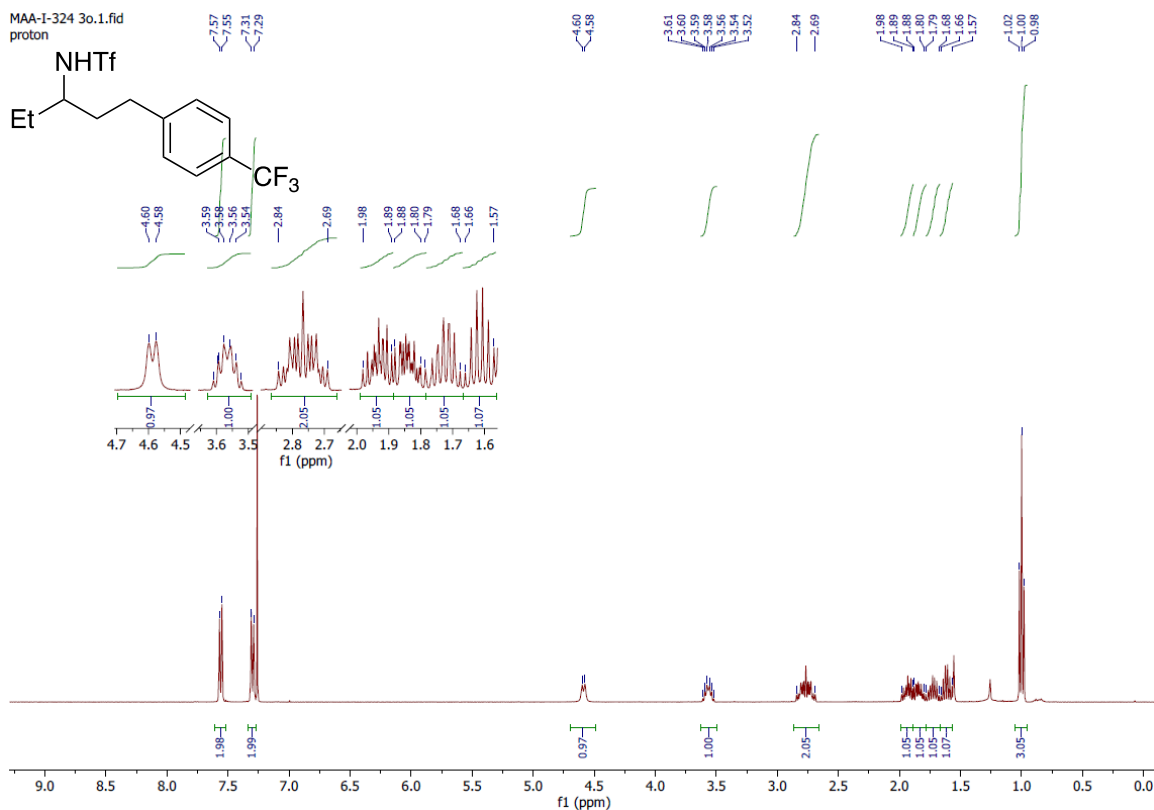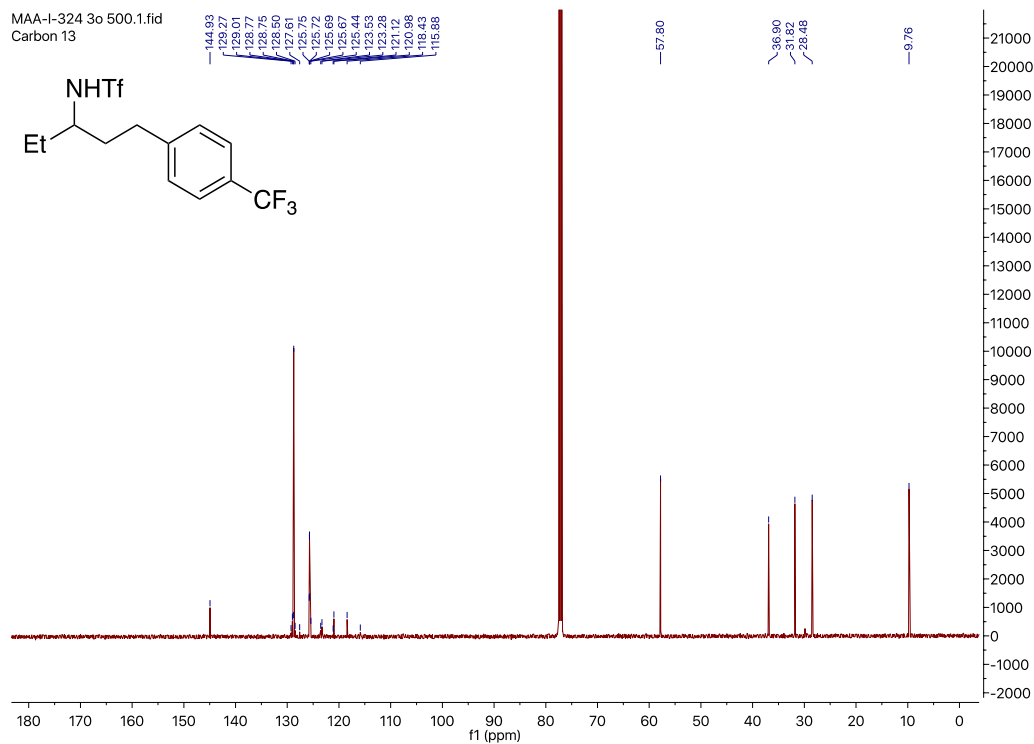

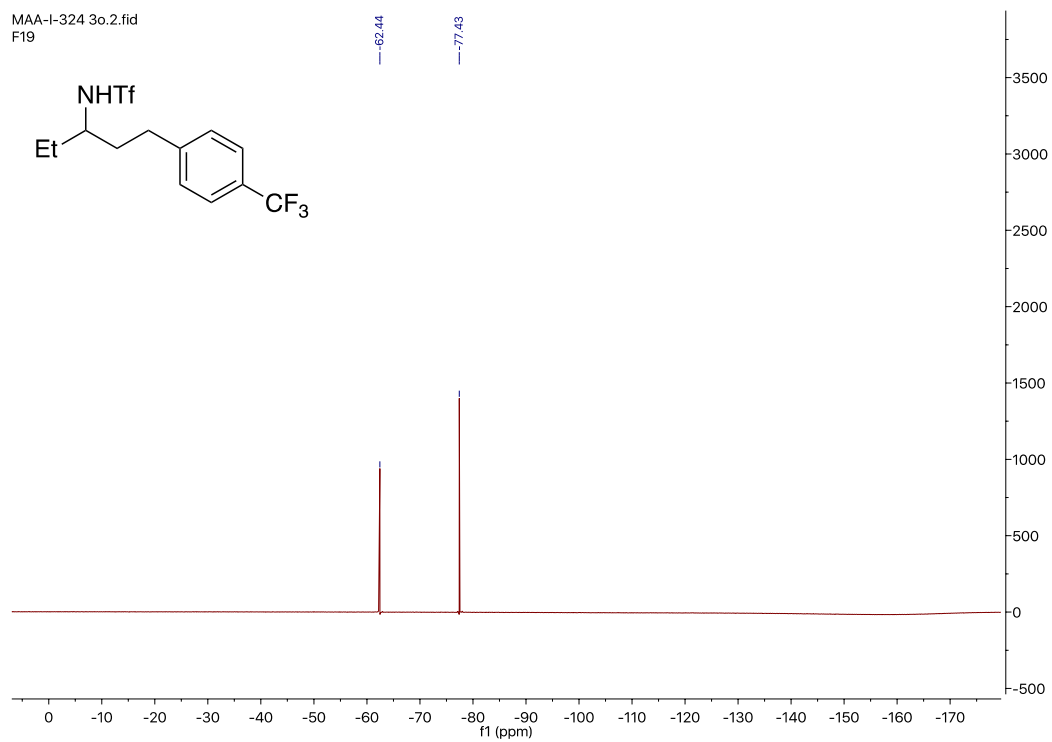

**Methyl 4-(3-((trifluoromethyl)sulfonamide)pentyl)benzoate (3aq)**

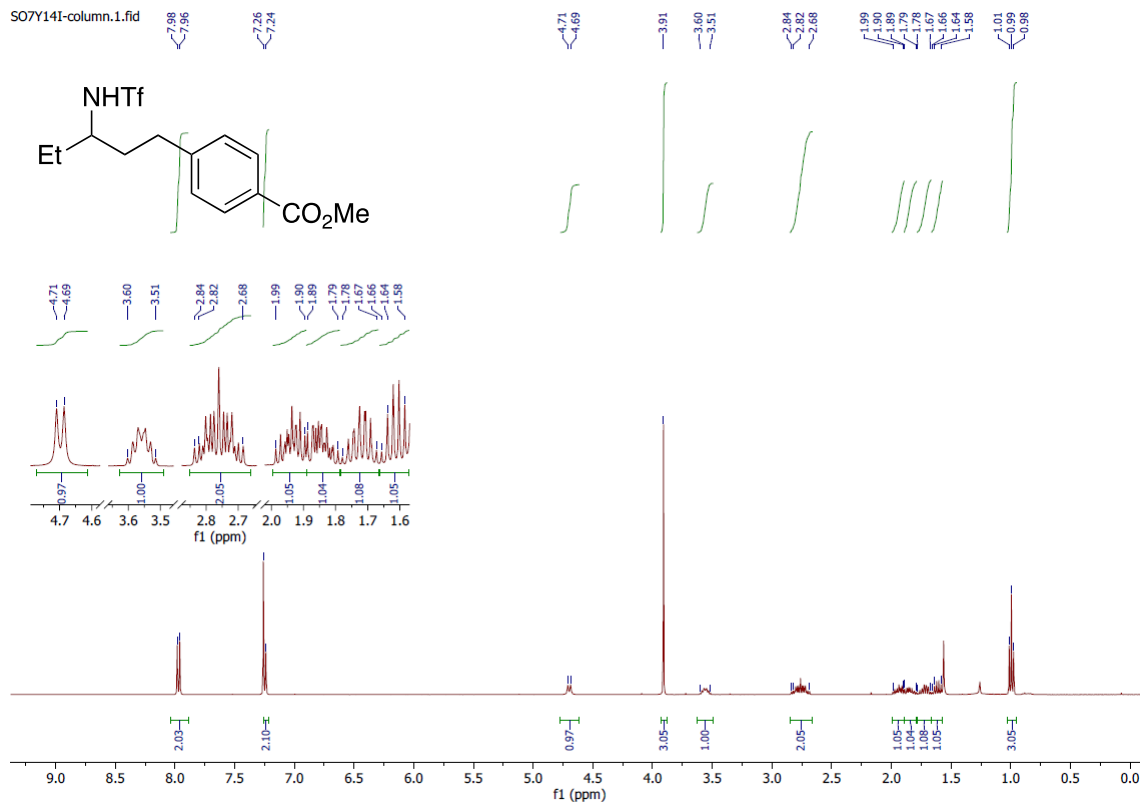



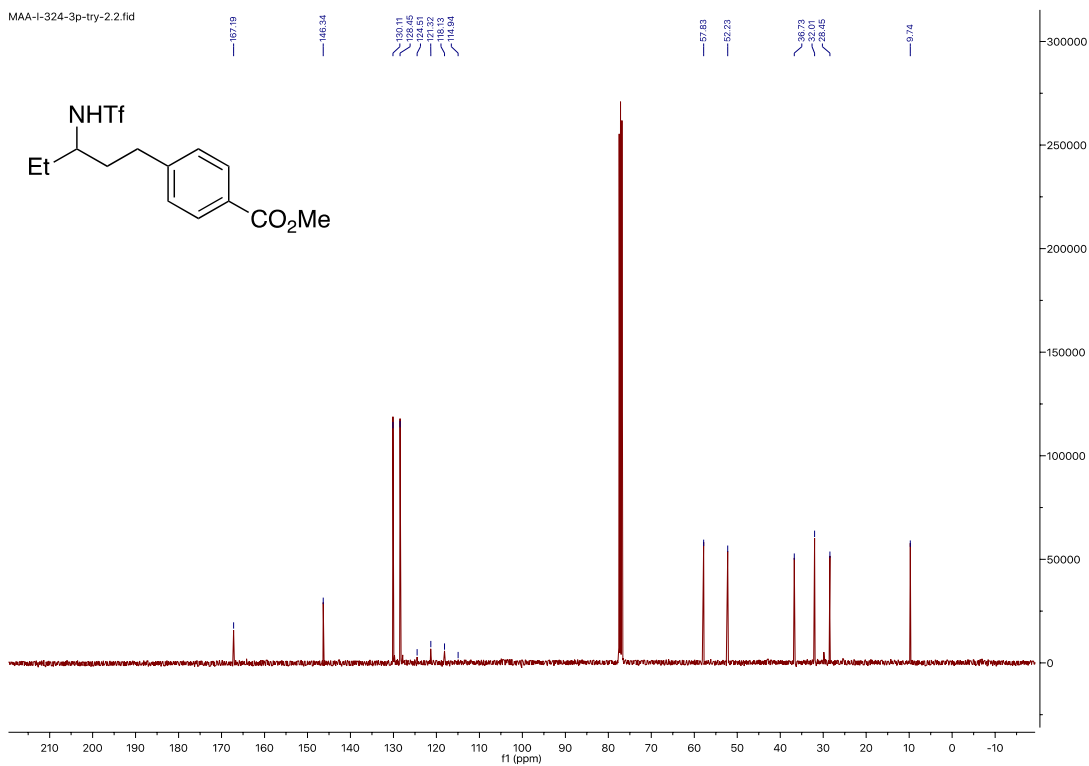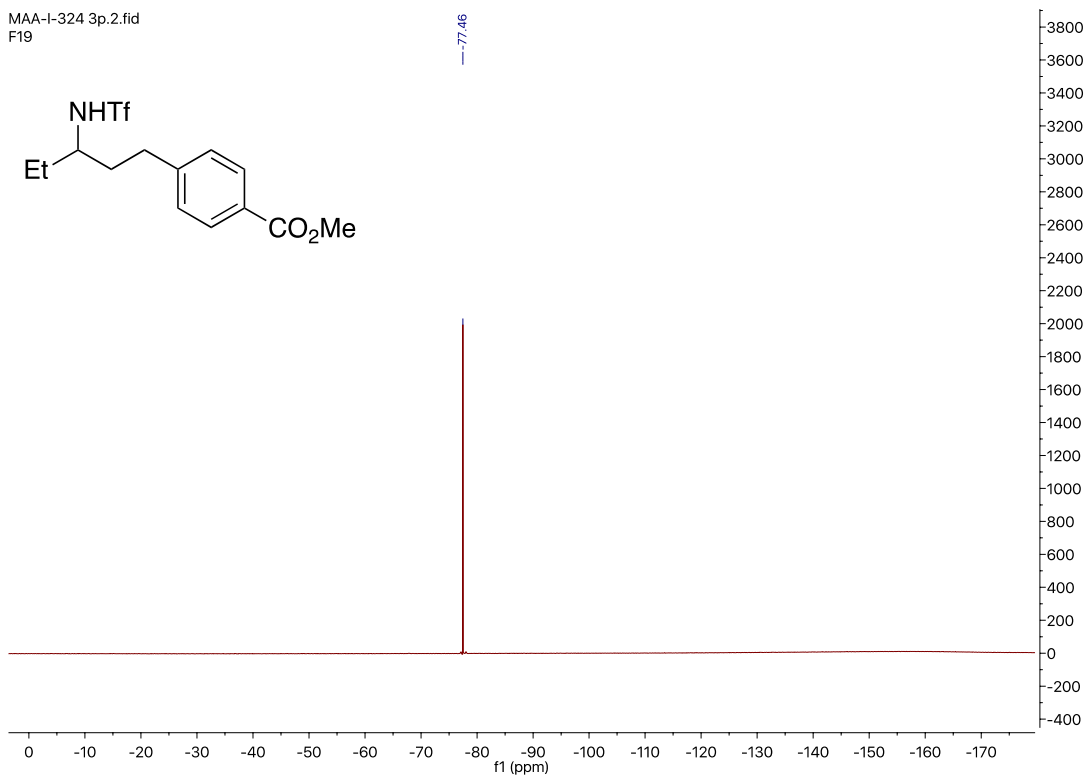

**1,1,1-trifluoro-N-(1-(pyridine-3-yl)pentan-3-yl)methanesulfonamide (3ar)**

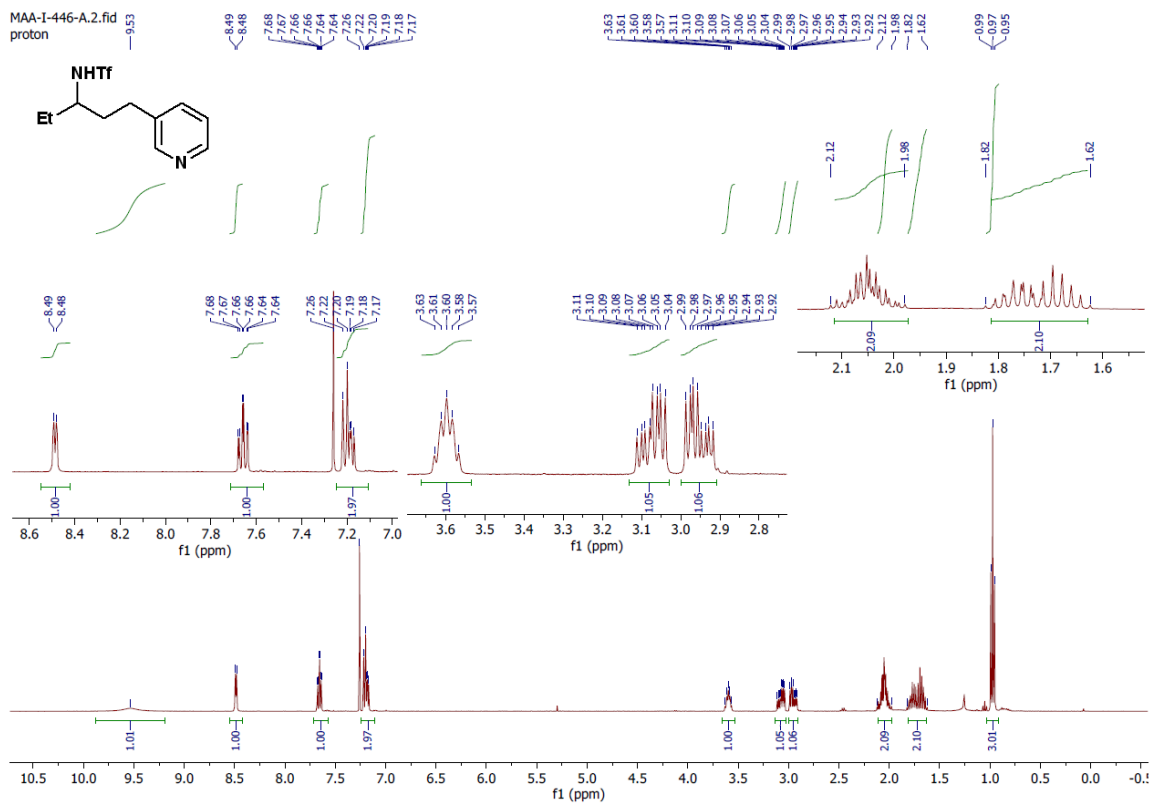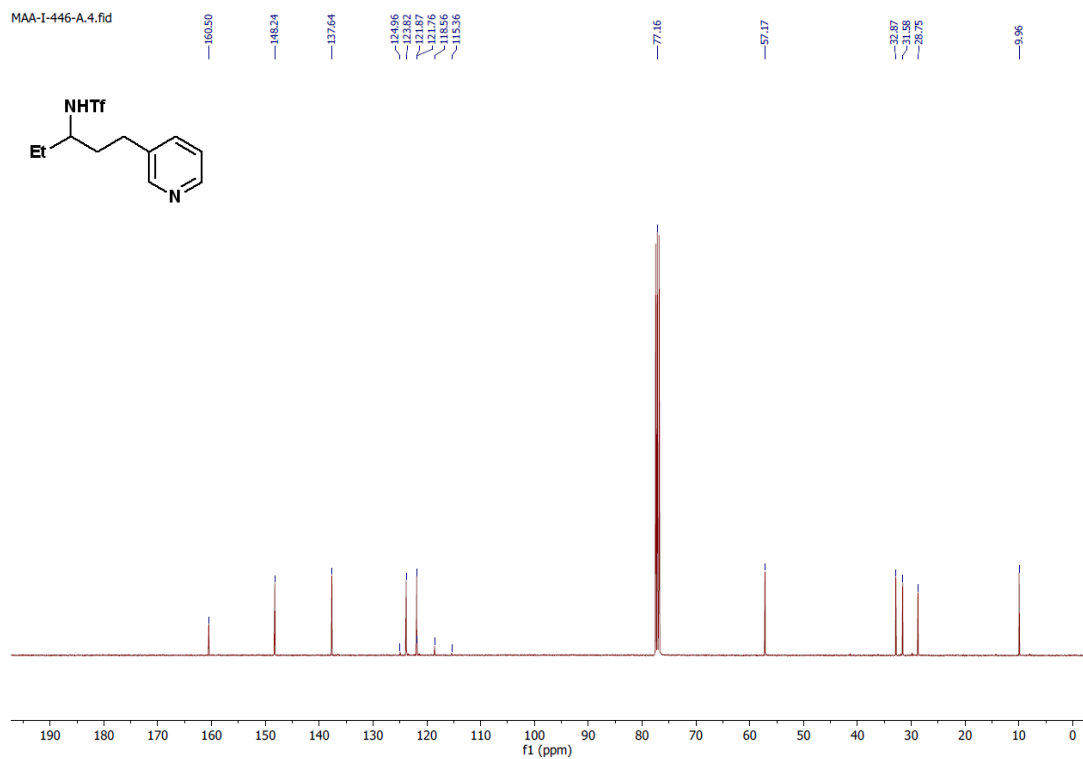

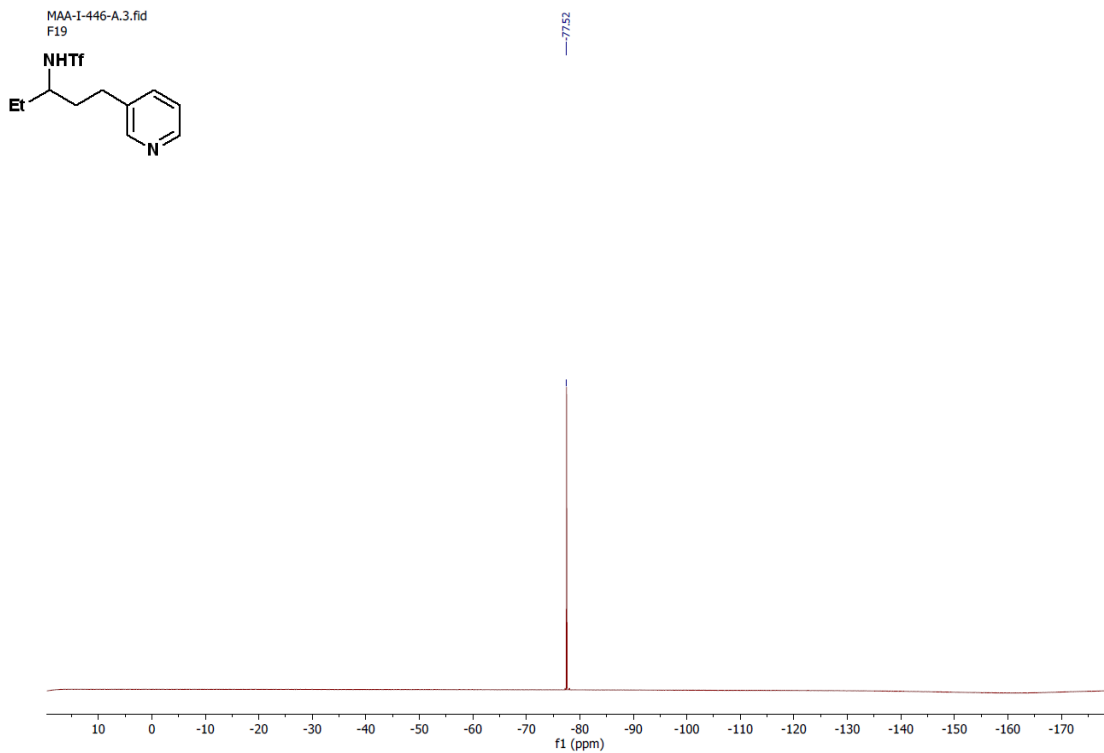

***tert*-butyl 4-((trifluoromethyl)sulfonamido)heptanoate (3ba)**

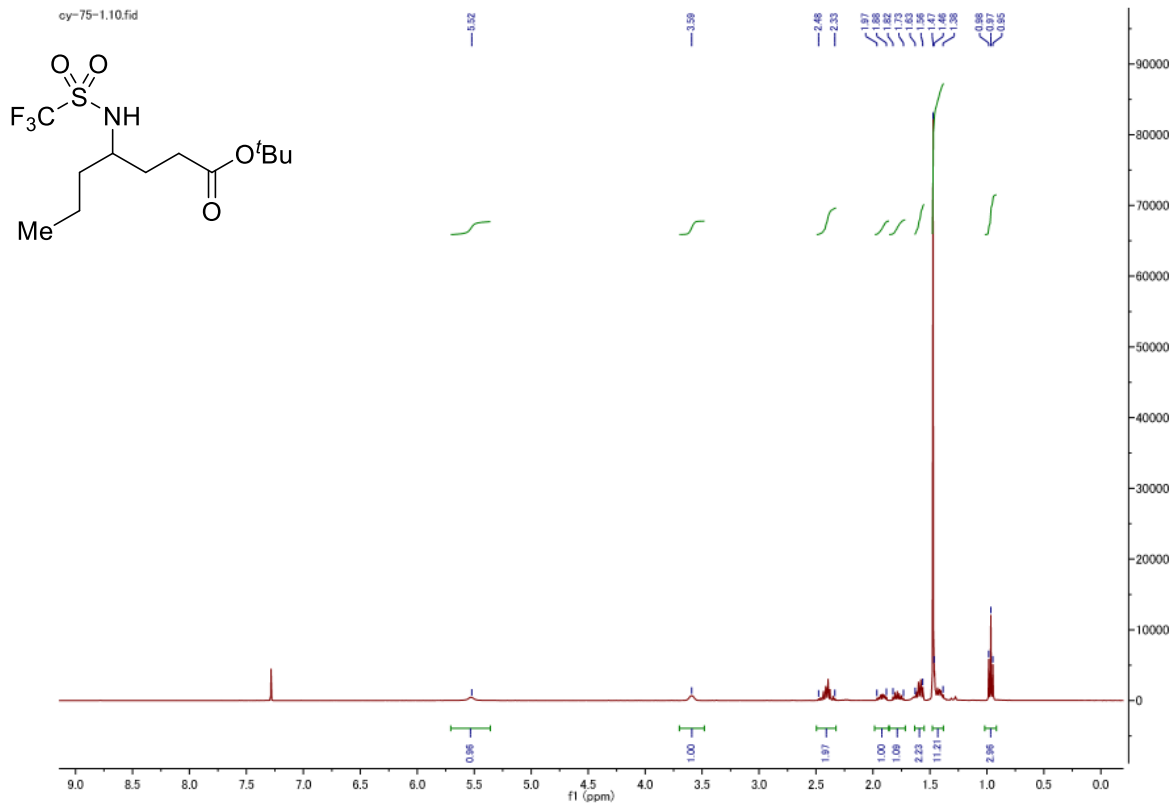

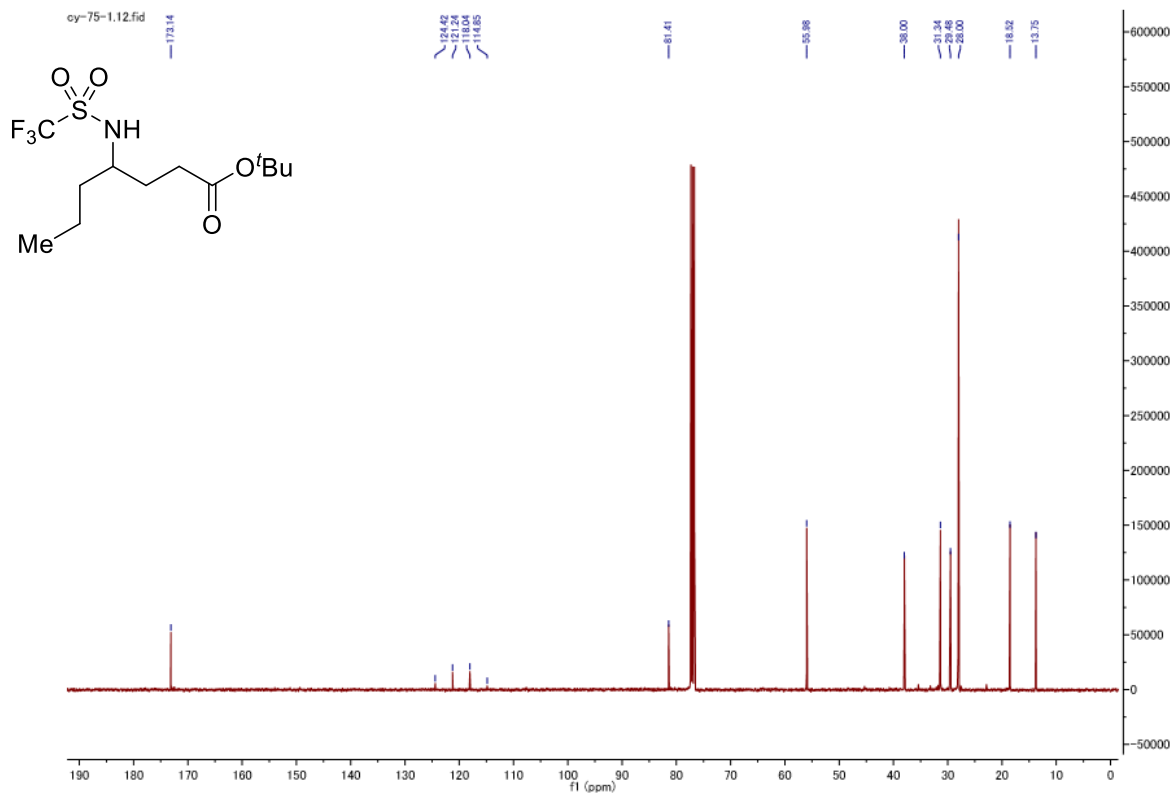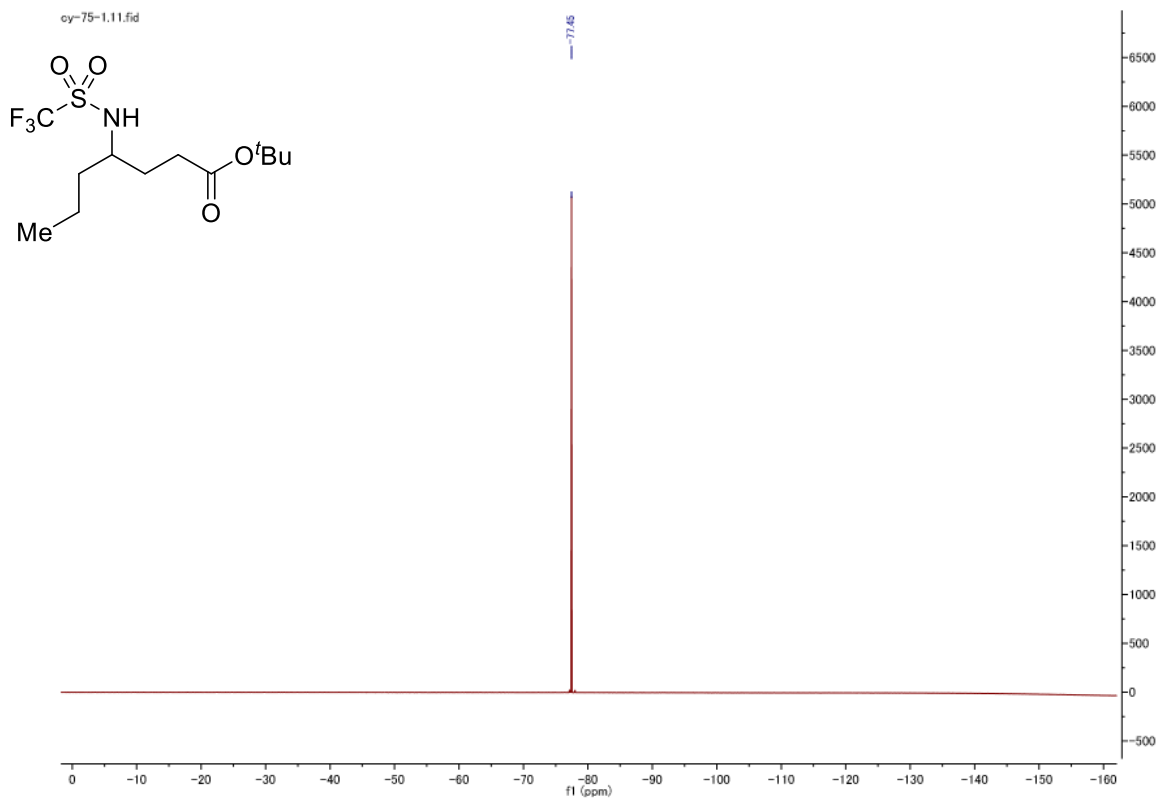

**tert-butyl 4-((trifluoromethyl)sulfonamido)octanoate (3ca)**

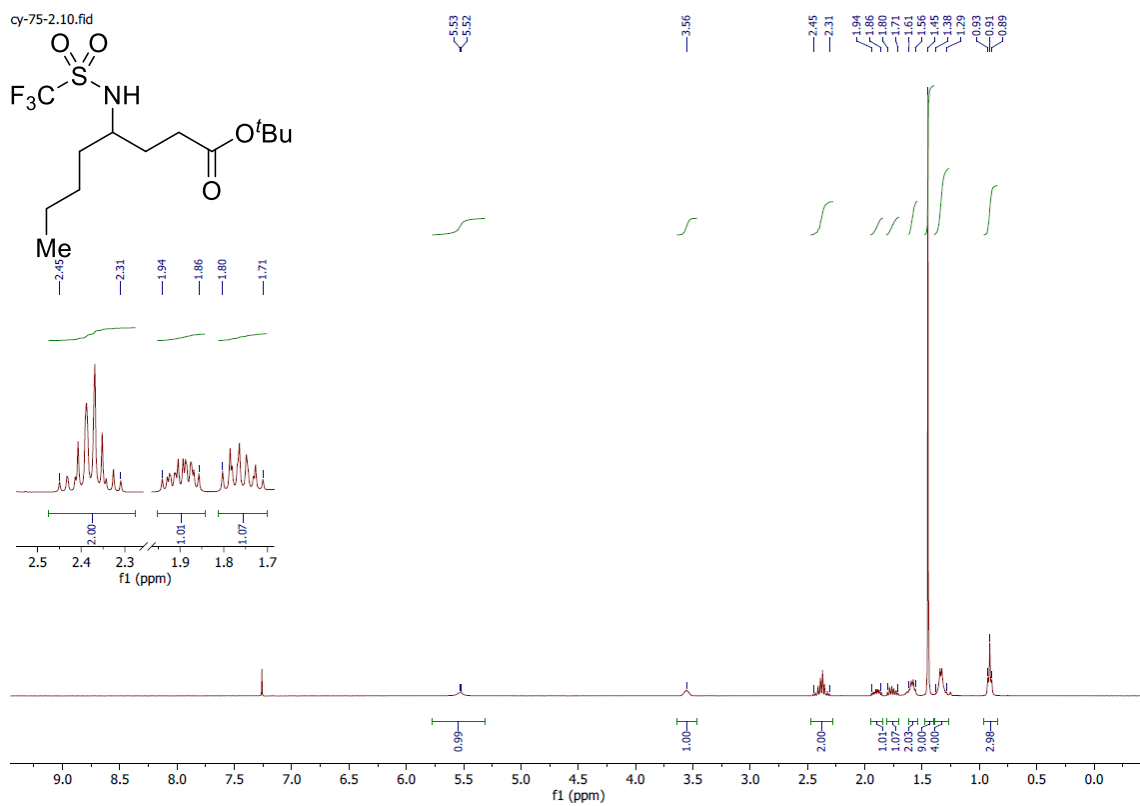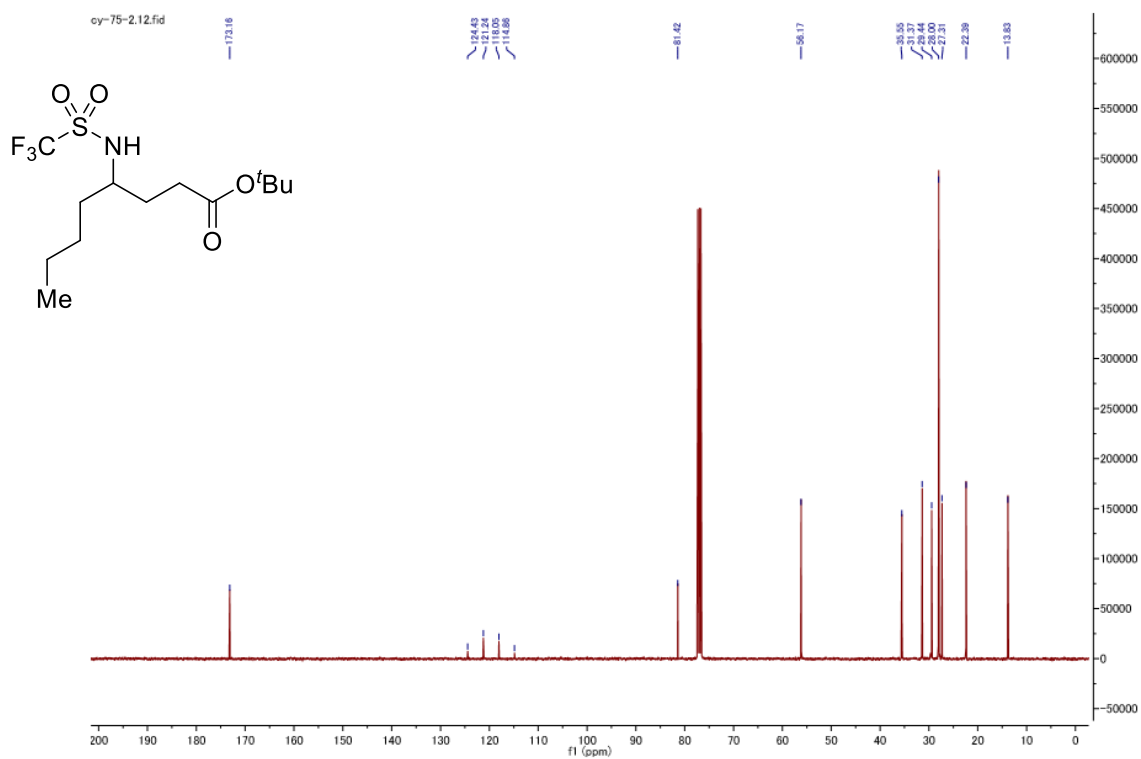

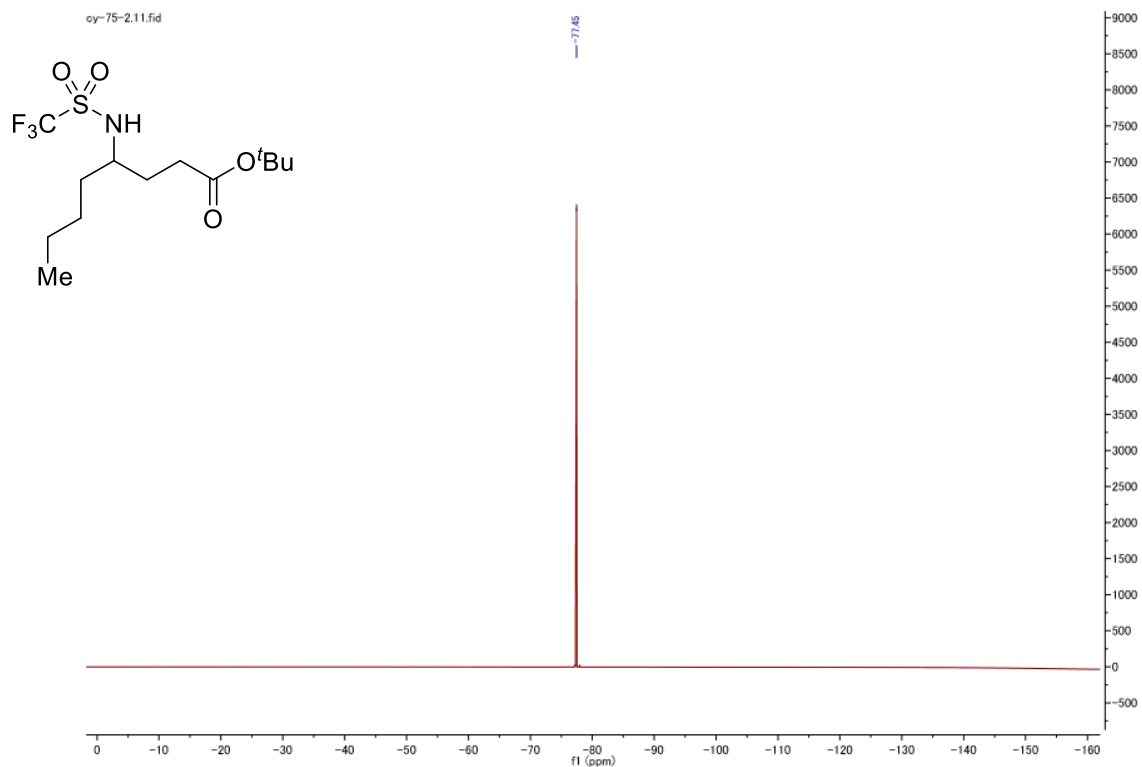

**tert-butyl 4-cyclohexyl-4-((trifluoromethyl)sulfonyl)butanoate (3da)**

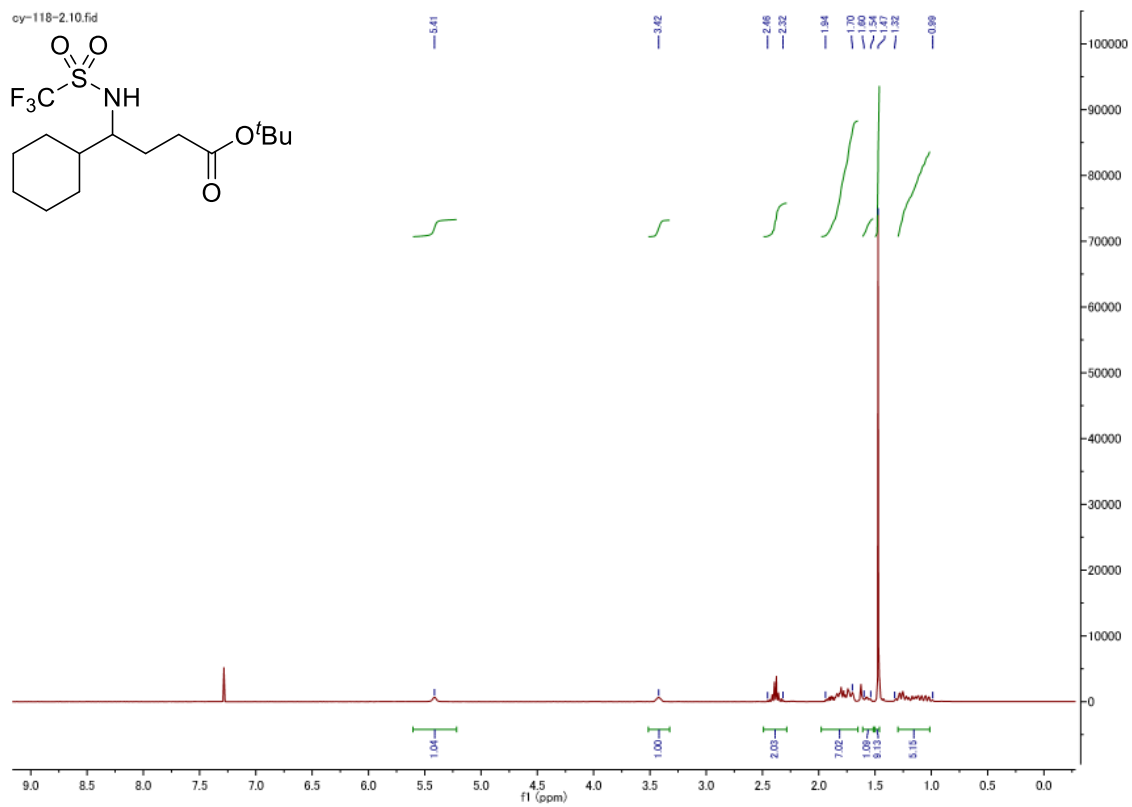

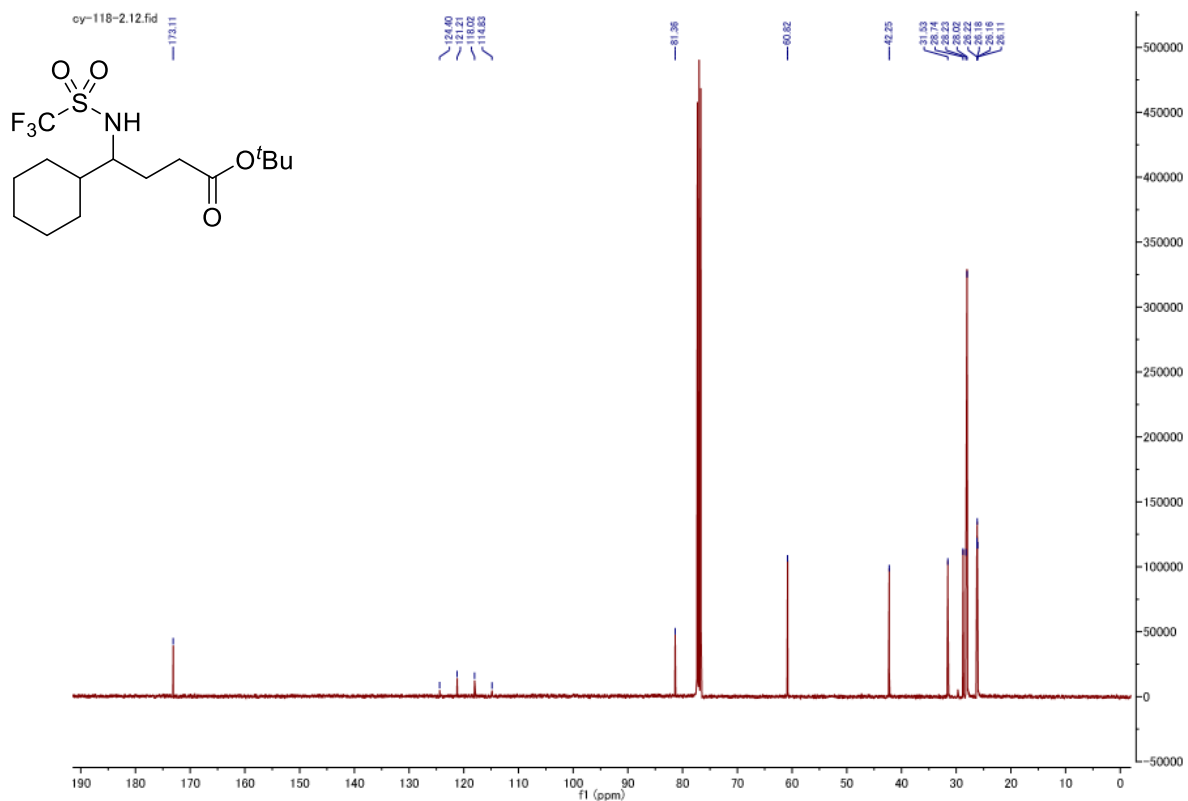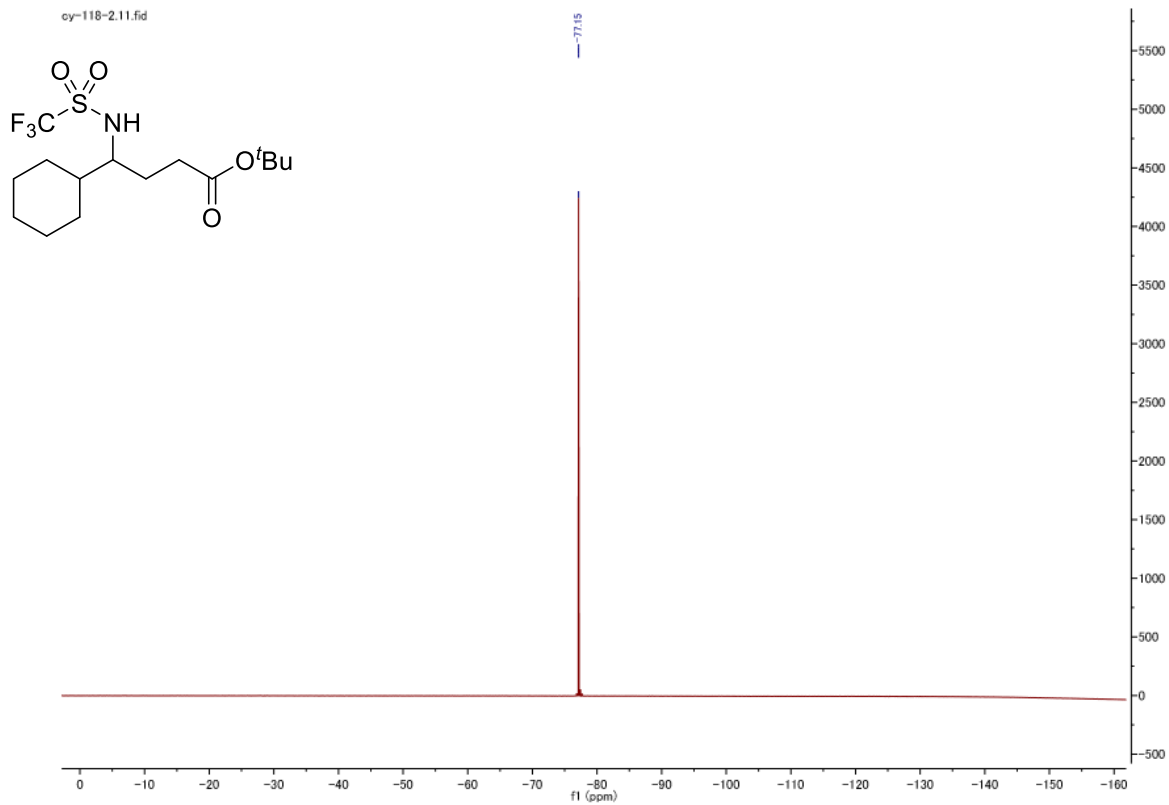

***tert*-butyl 4-methyl-4-((trifluoromethyl)sulfonamido)pentanoate (3ea)**

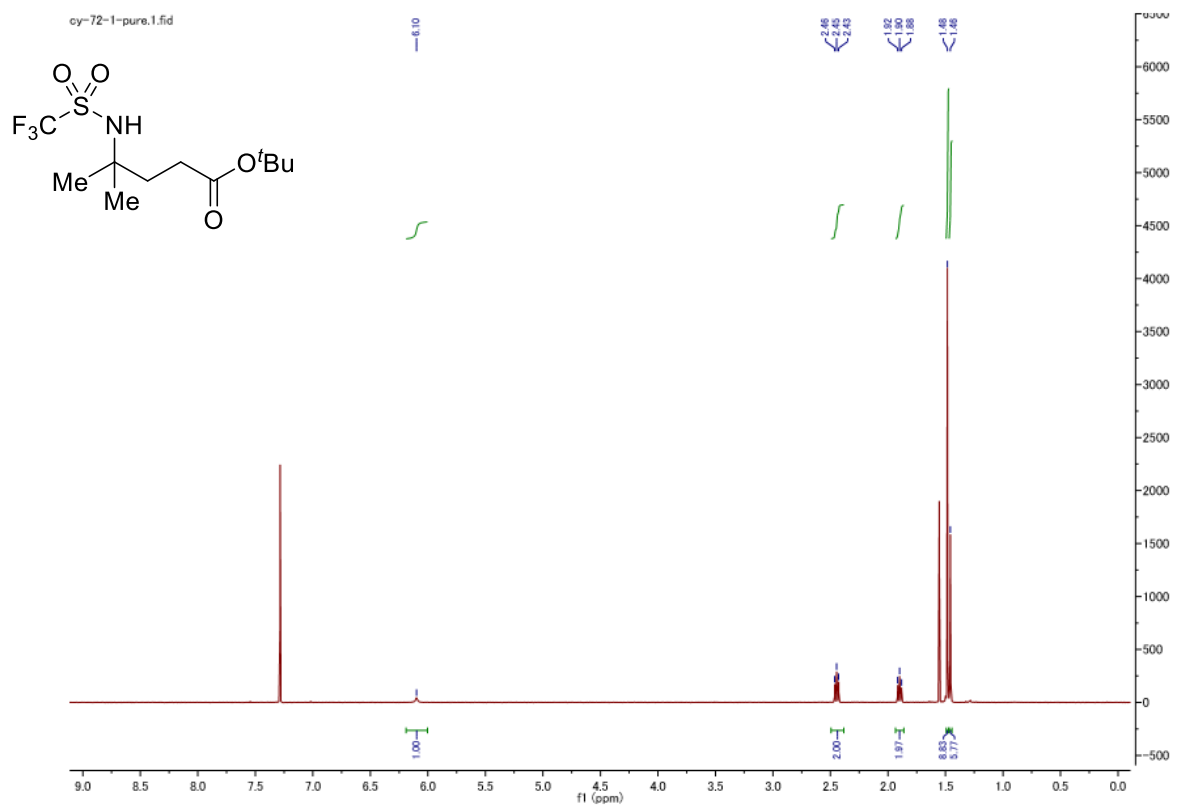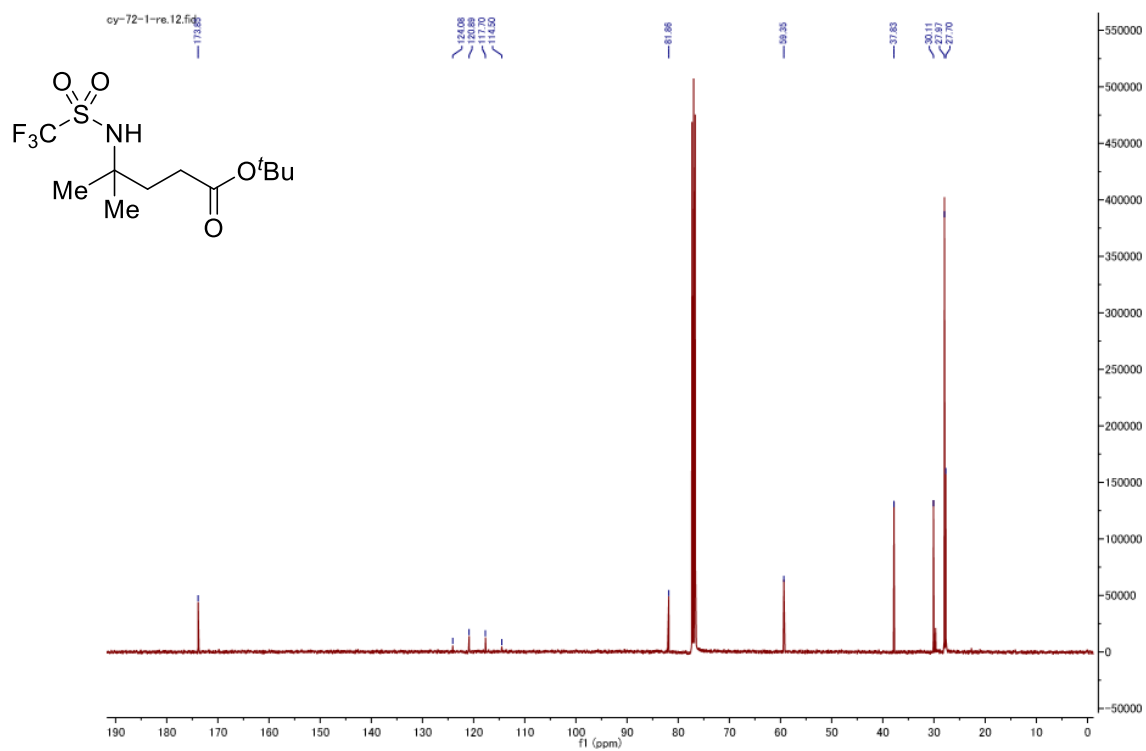



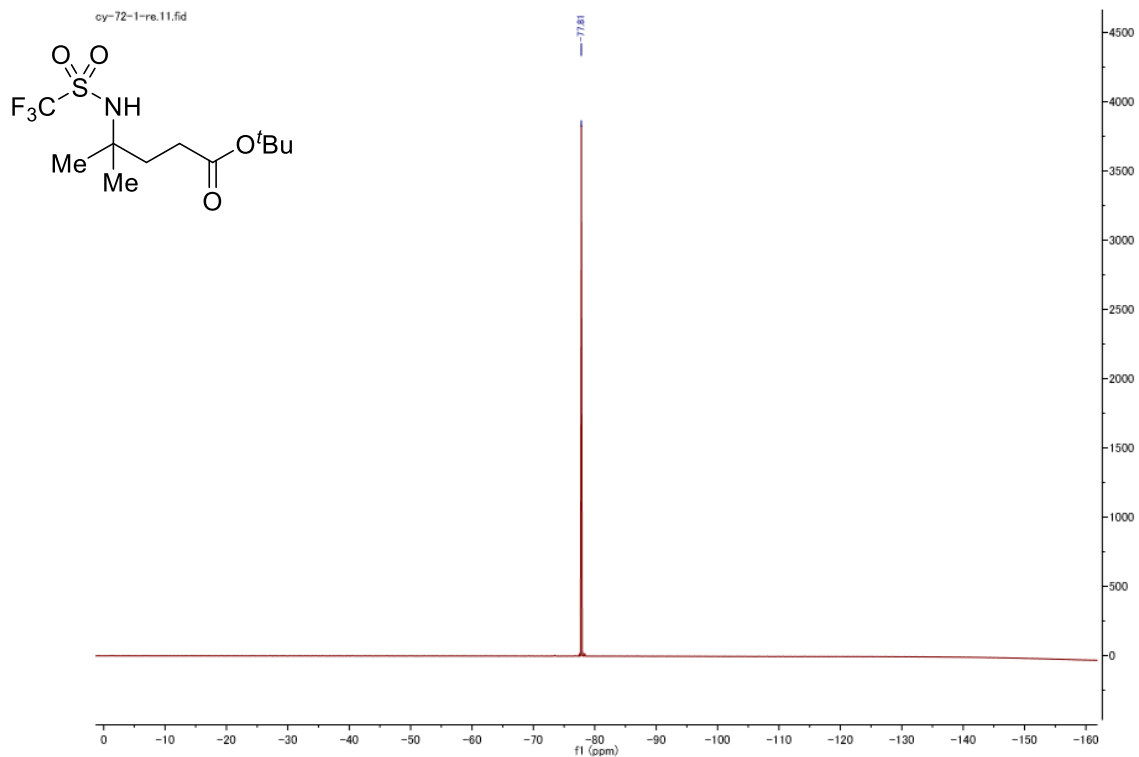

***tert*-butyl 3-((trifluoromethyl)sulfonamido)cyclohexylpropanoate (3fa)**

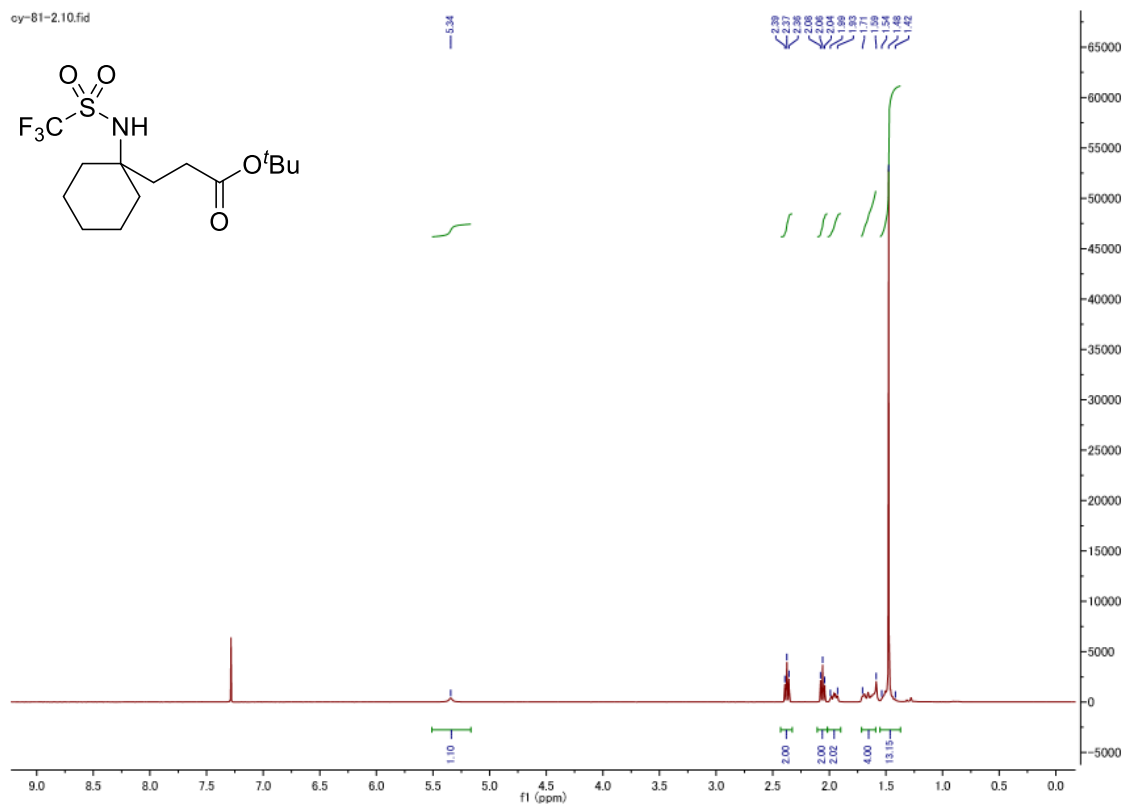

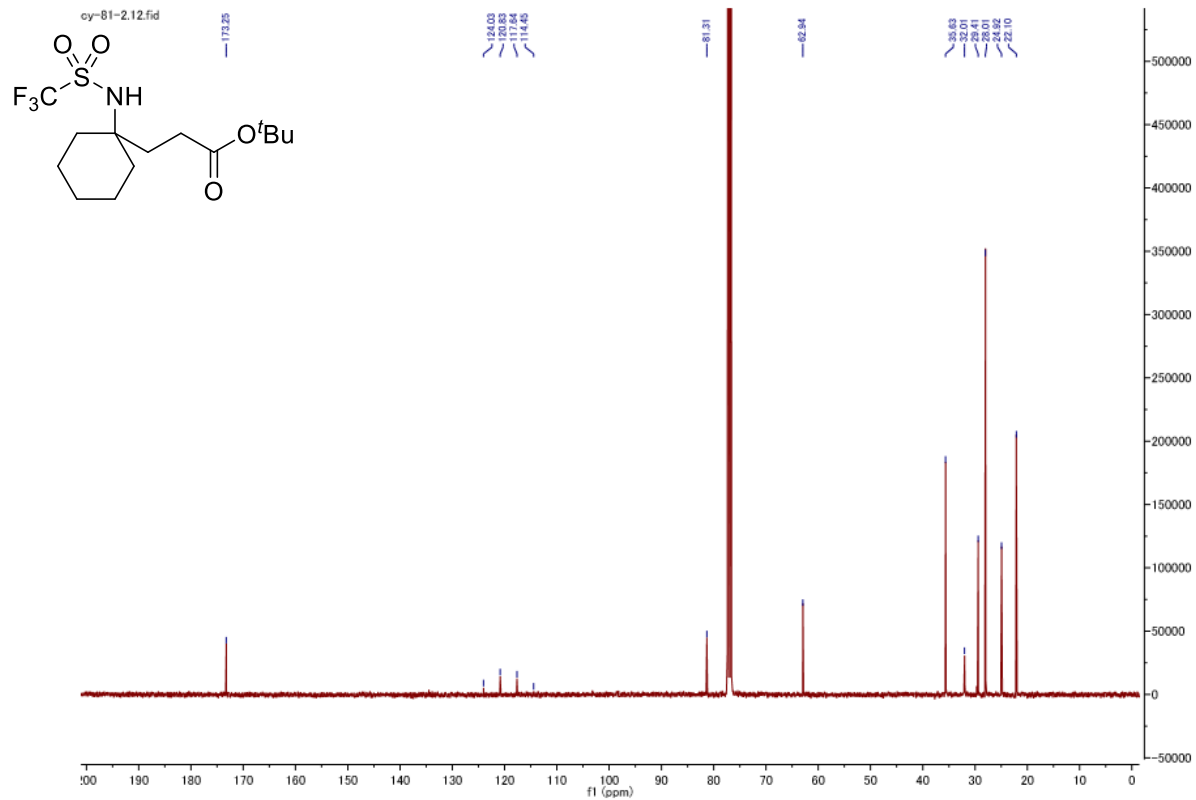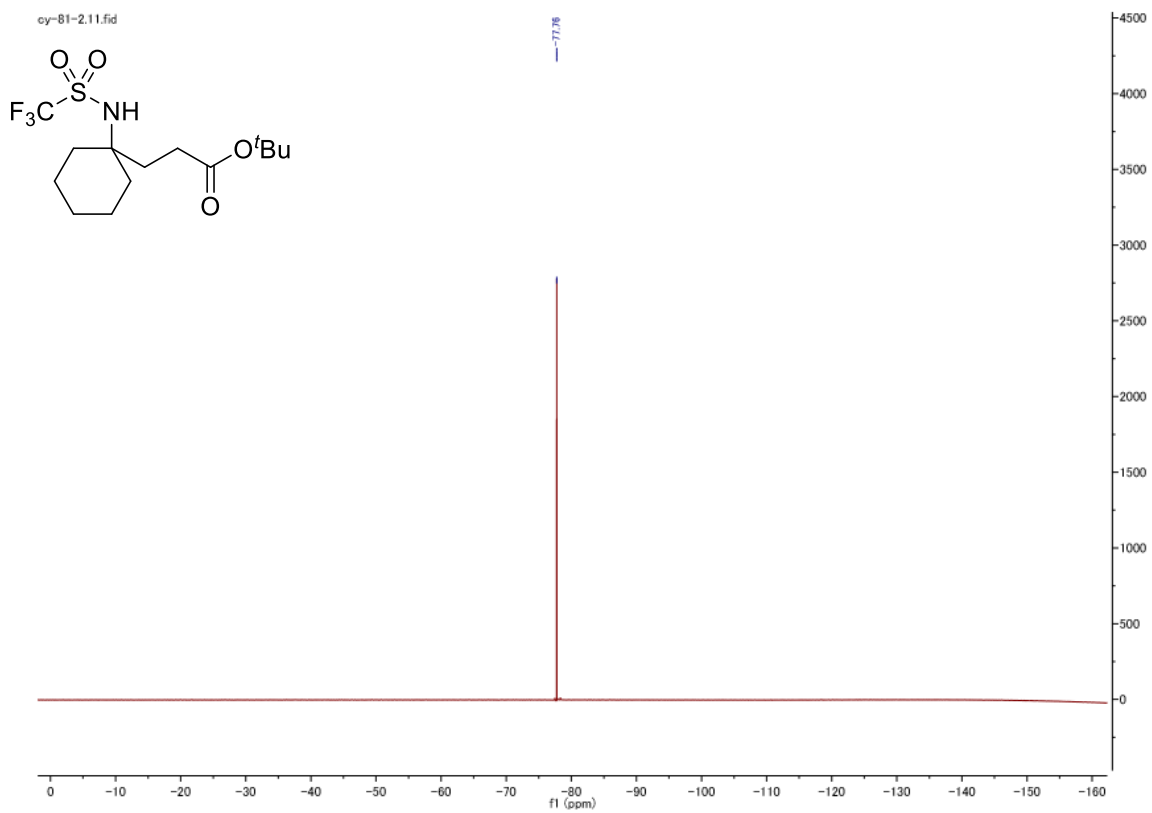

di-tert-butyl 4-((Trifluoromethyl)sulfonamide)heptanedioate (3ga)

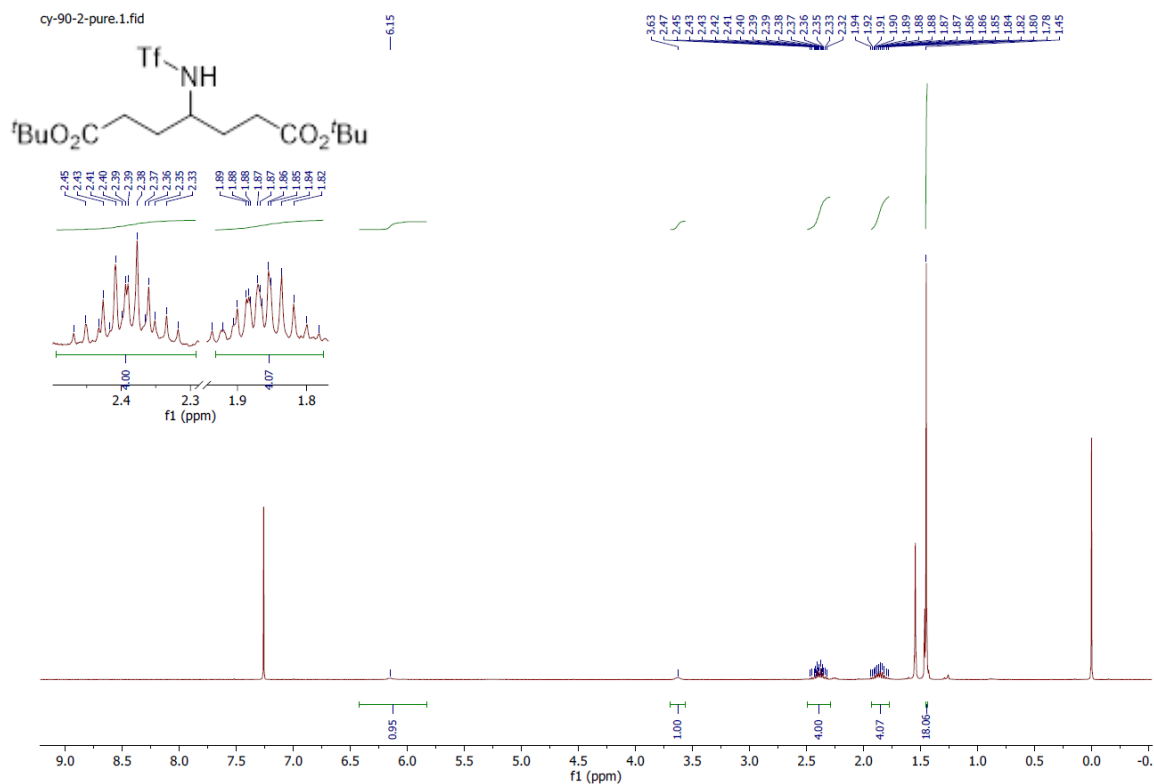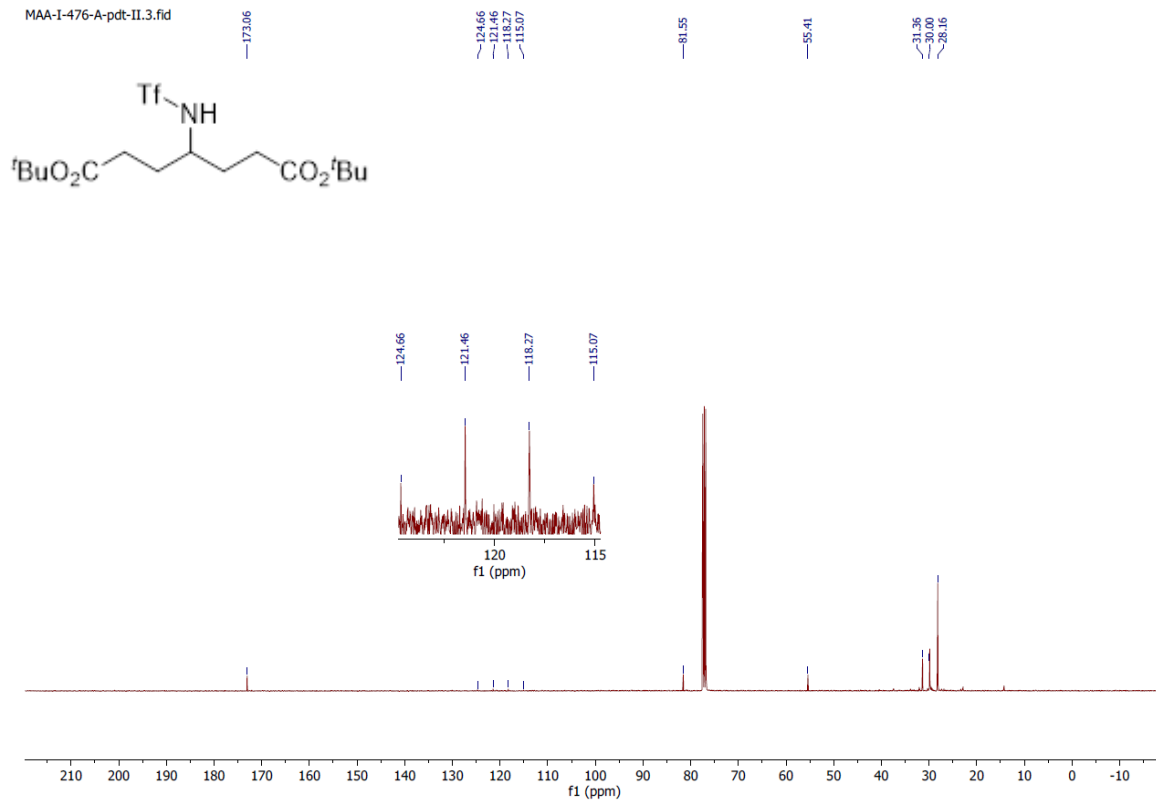

MAA-I-476-A-pdt-II.2.fid  
F19

-77.25

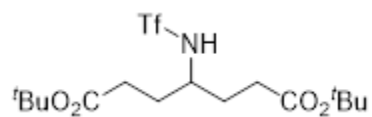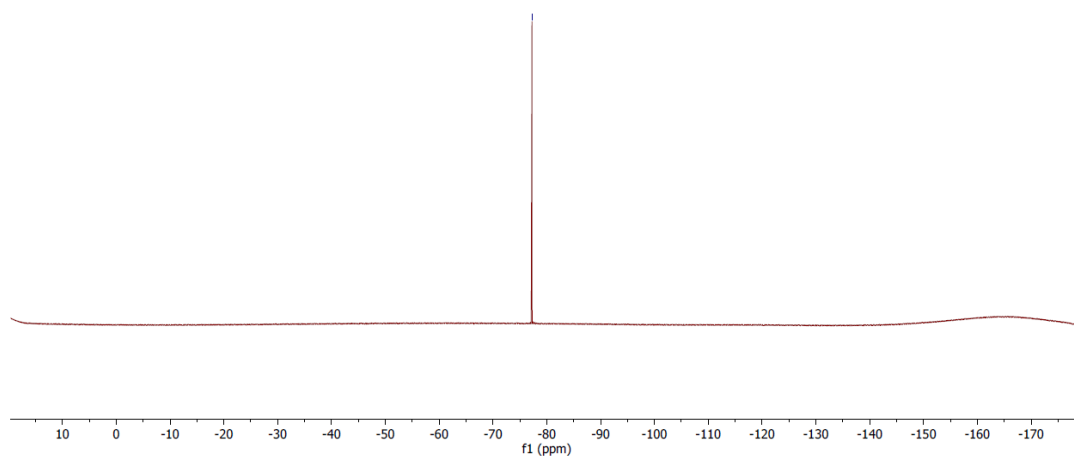

### diethyl 3-((trifluoromethyl)sulfonamido)hexanedioate (3hb)

cy-102-2.10.fid

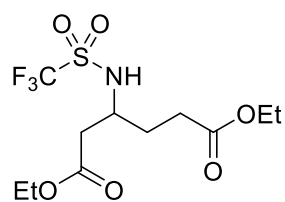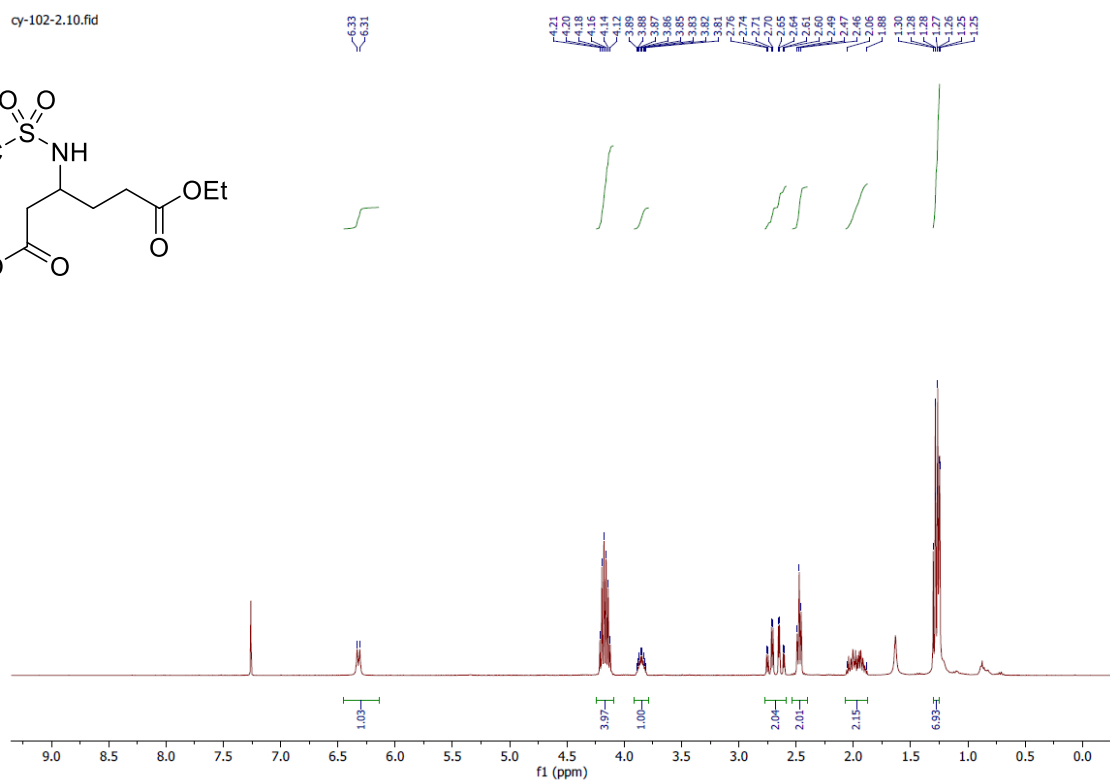

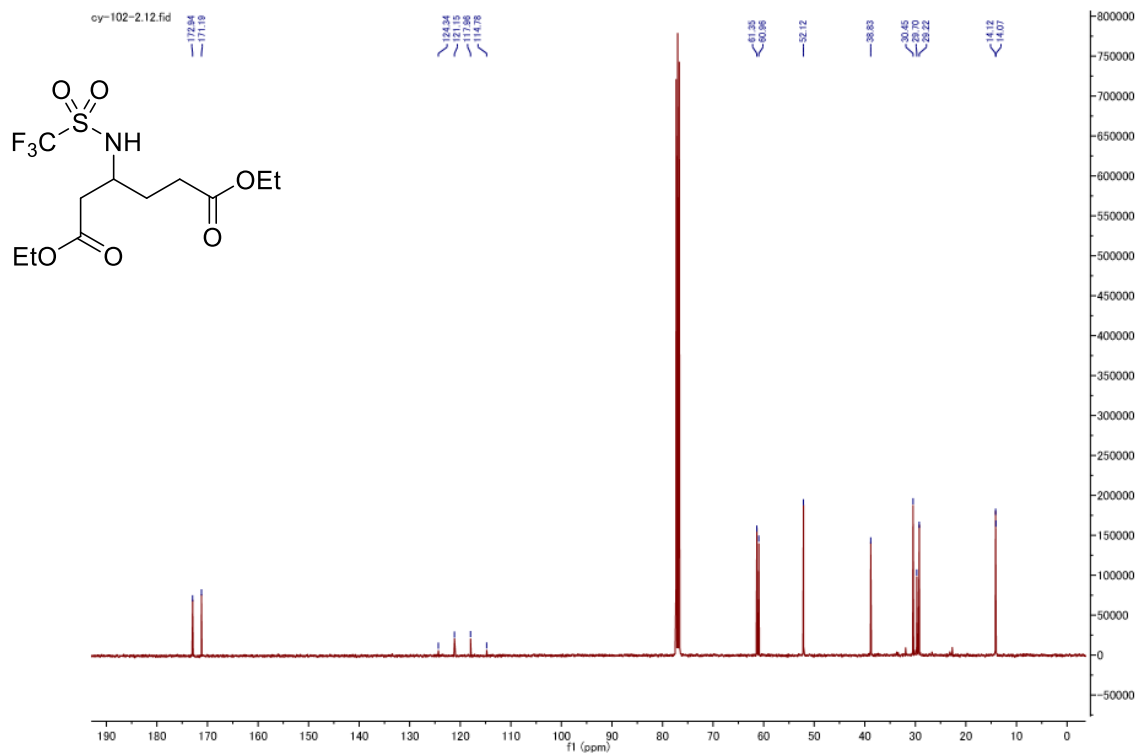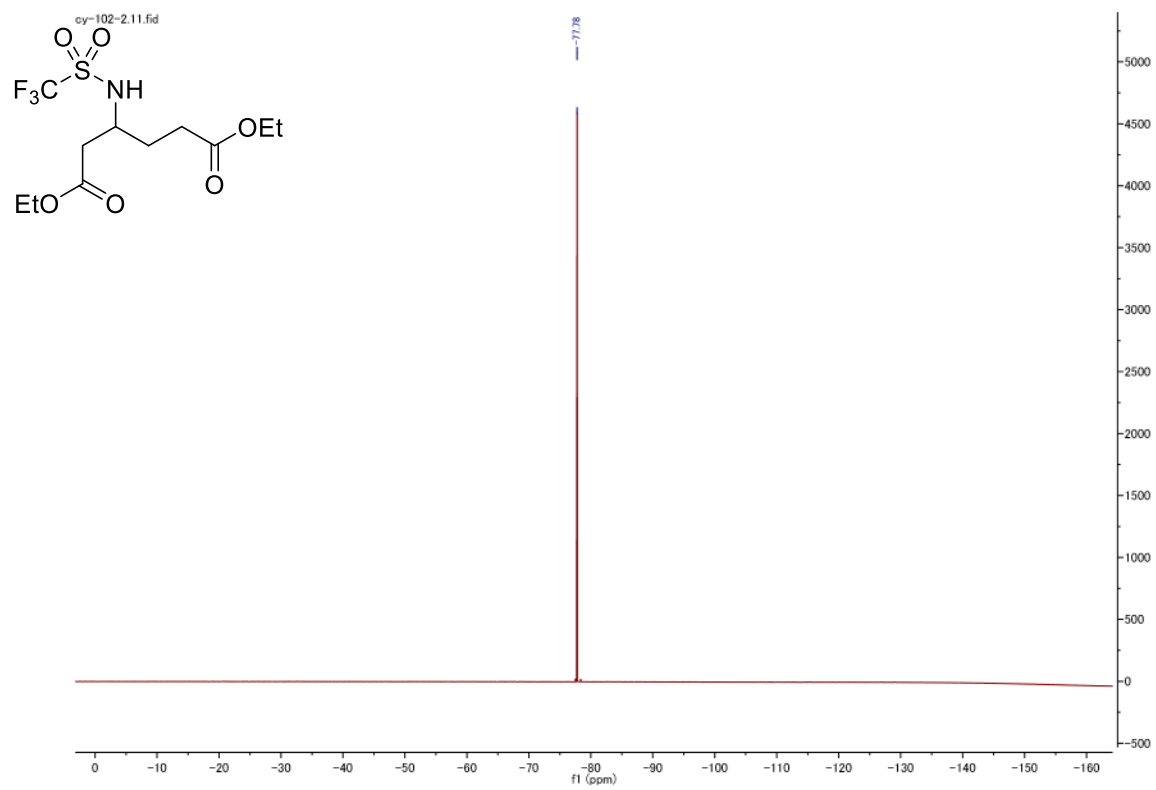

**tert-butyl 5-(pyridin-2-yl)-4-((trifluoromethyl)sulfonamido)pentanoate (3ia)**

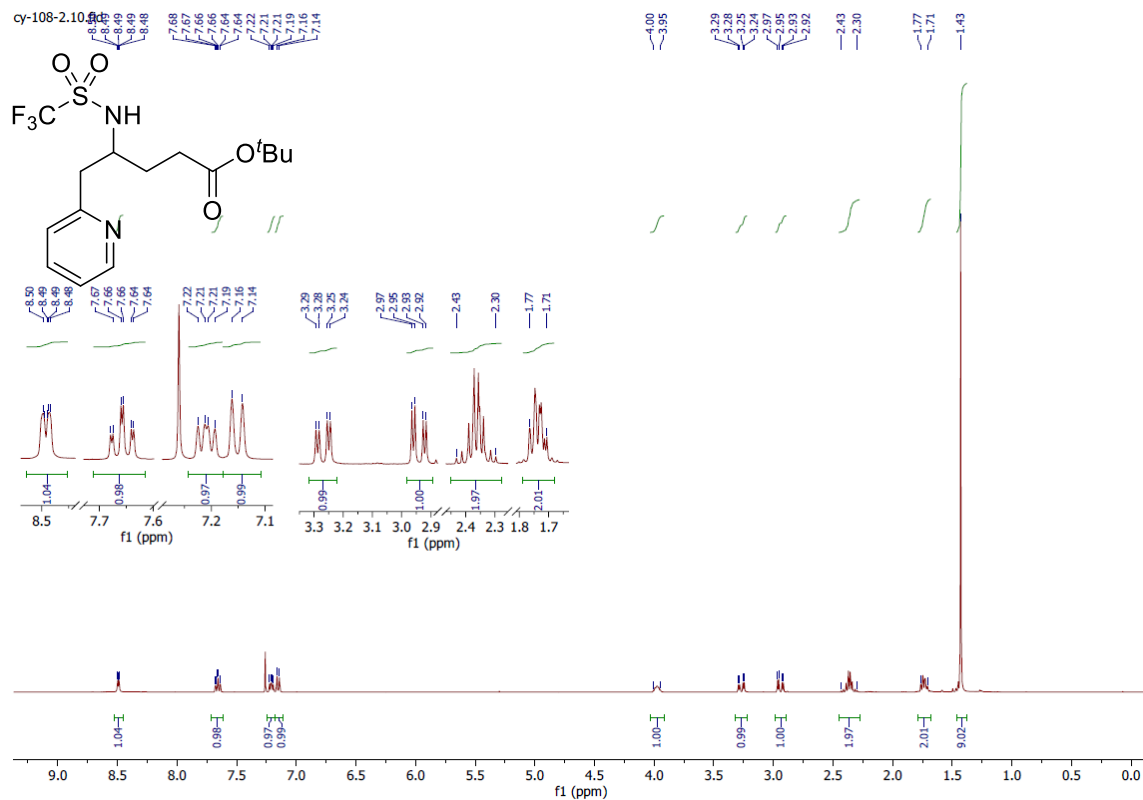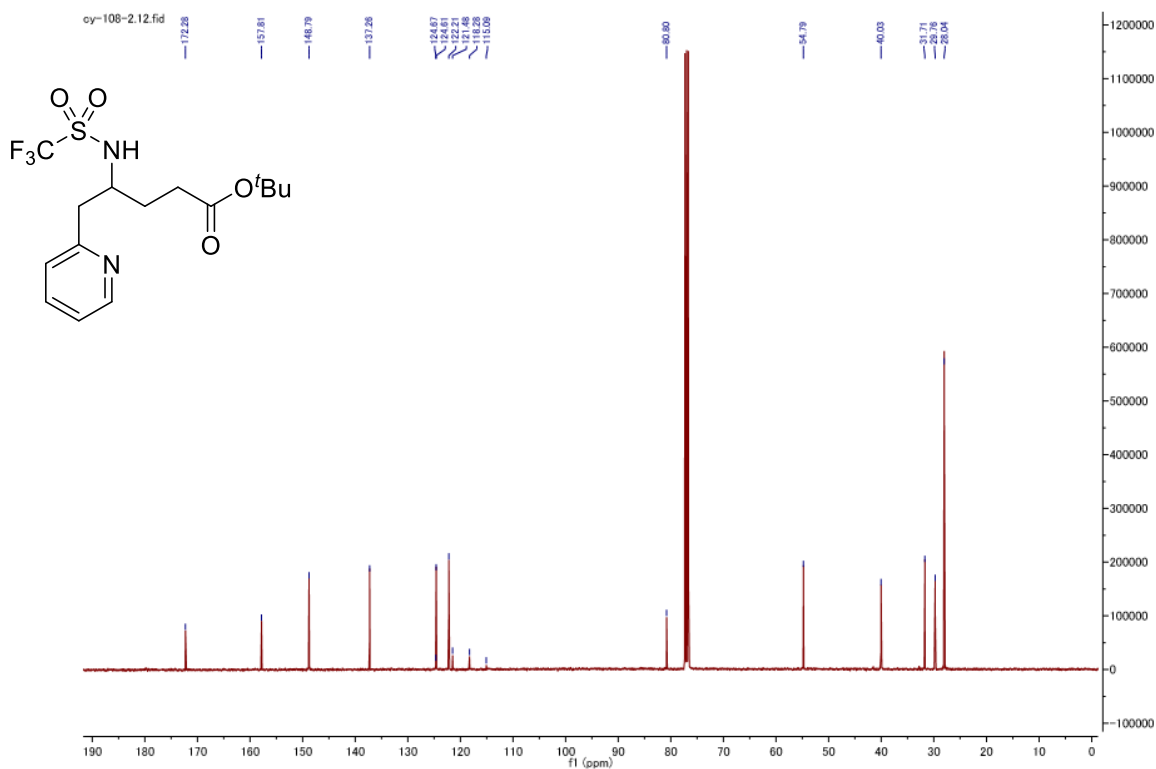

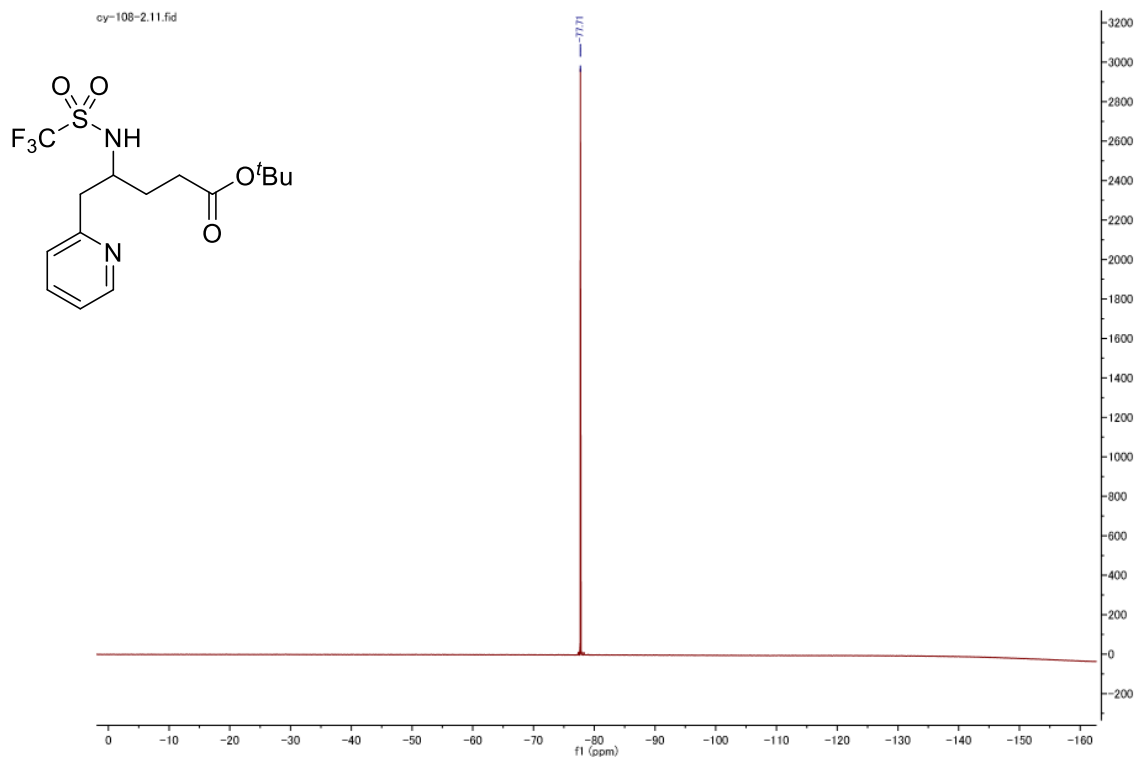

*tert*-butyl 5-(thiophen-2-yl)-4-((trifluoromethyl)sulfonamido)pentanoate (3ja)

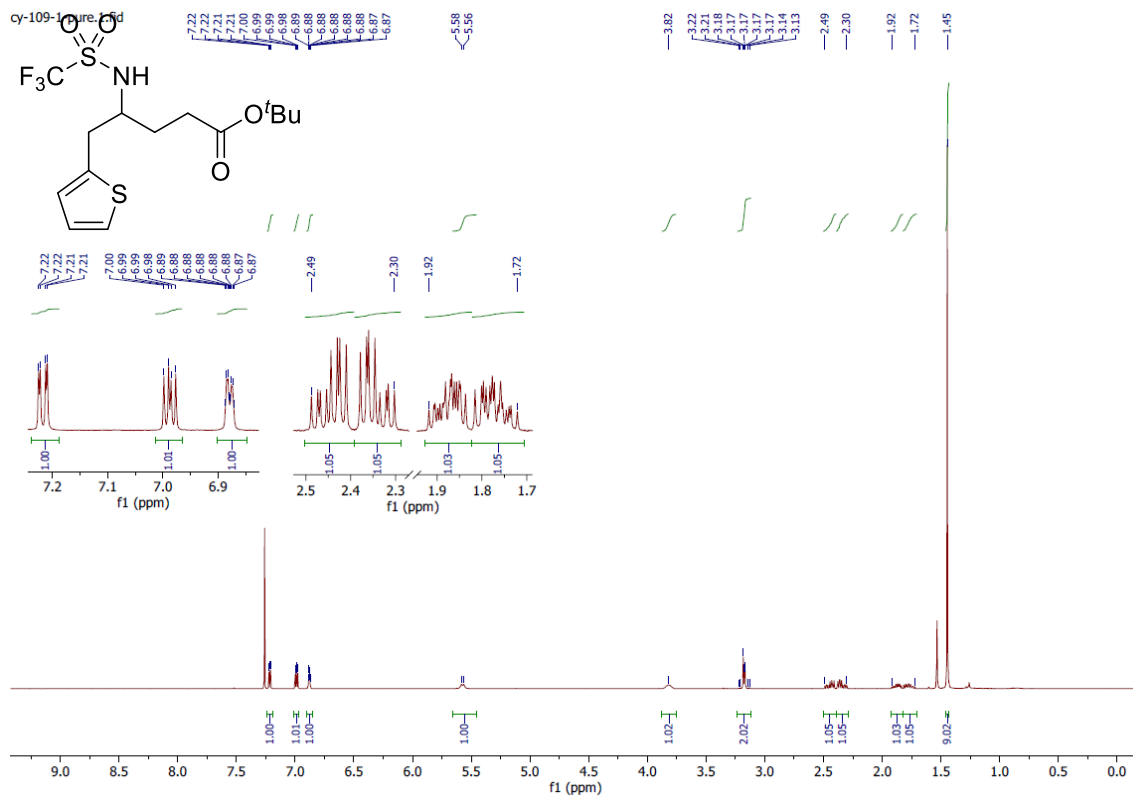

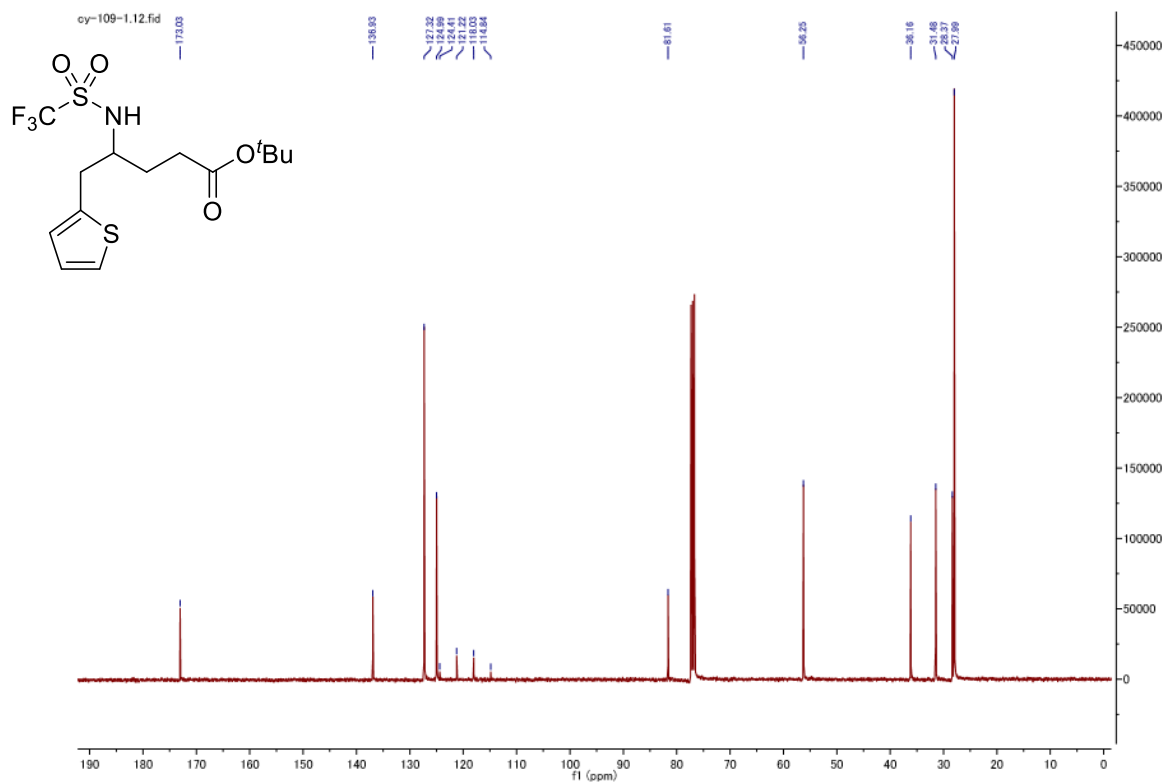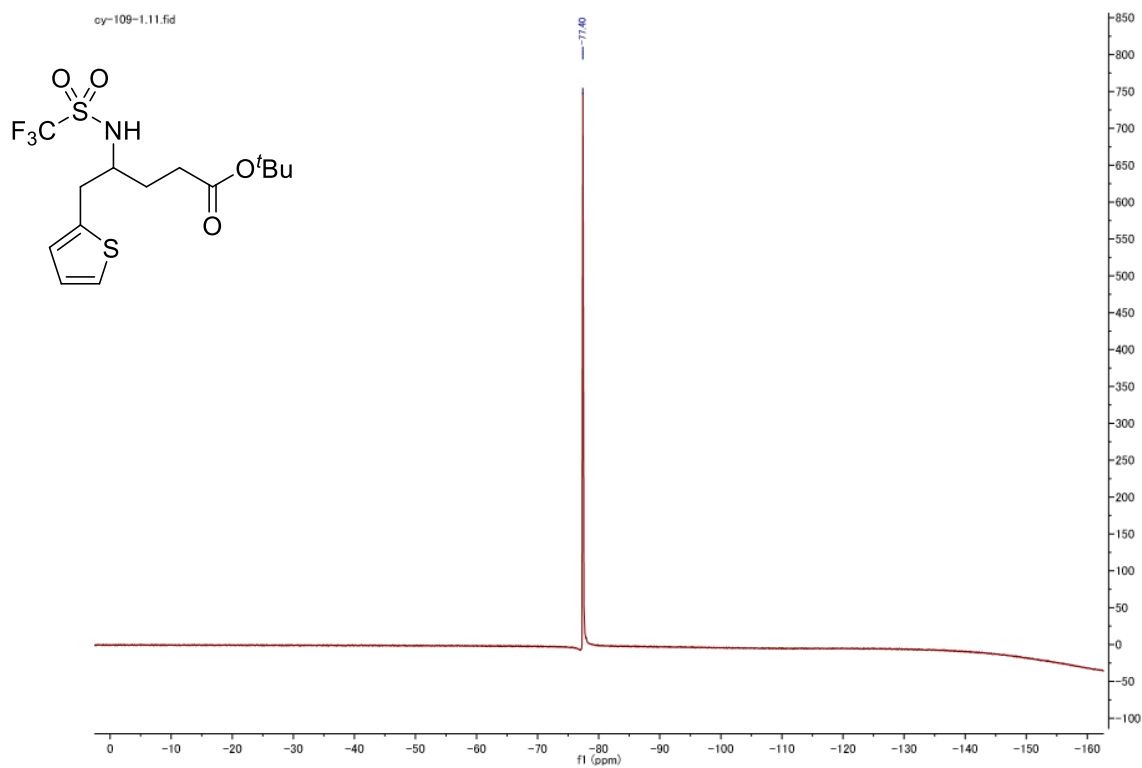



ethyl-4-((2*R*,3*R*,4*S*,5*R*,6*S*)-3,4,5,6-tetramethoxytetrahydro-2*H*-pyran-2-yl)-4-  
 ((trifluoromethyl)sulfonamido)butanoate (3kb)

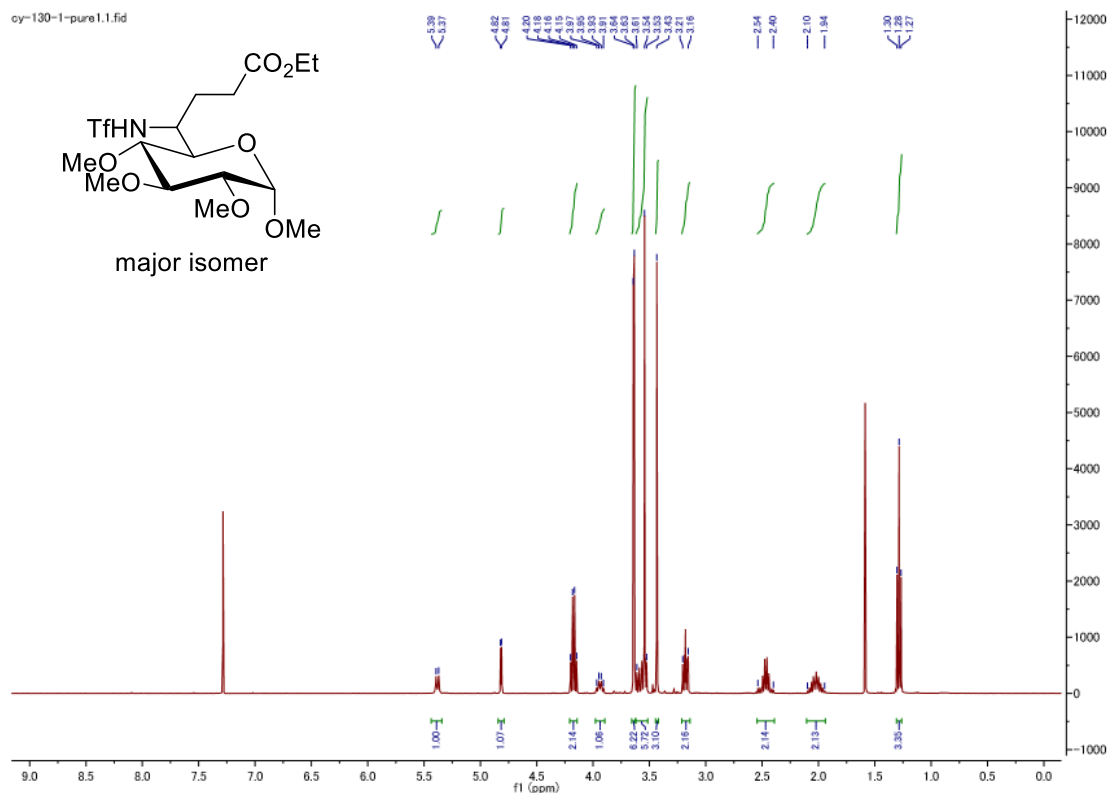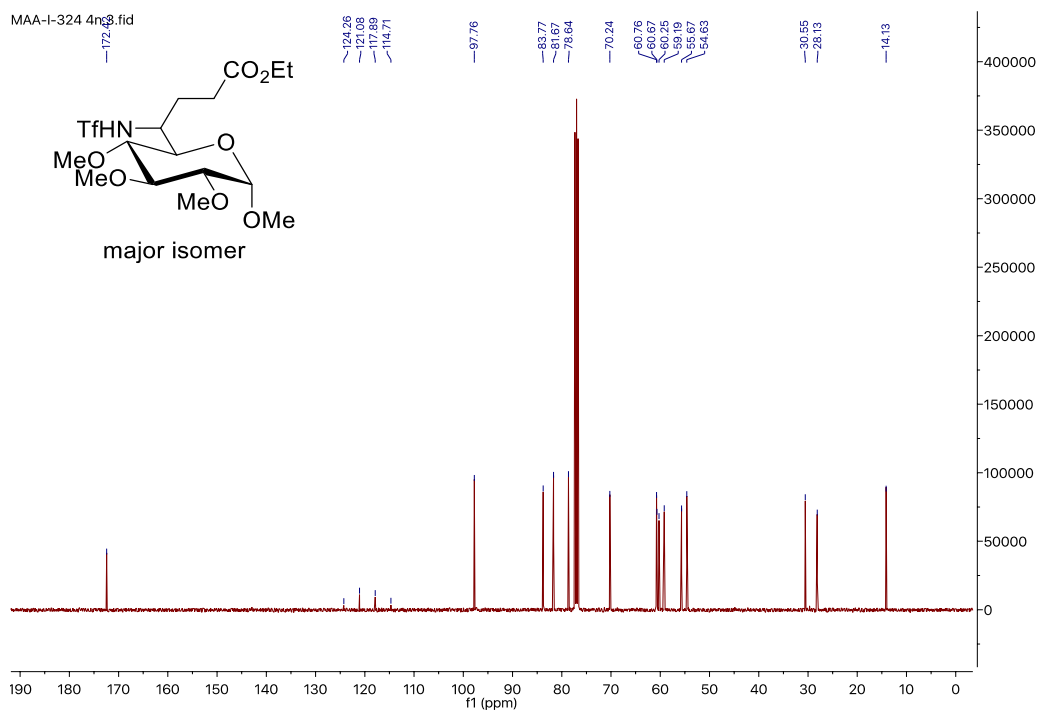

MAA-I-324 4n.2.fid  
F19

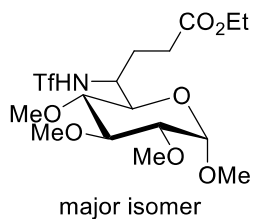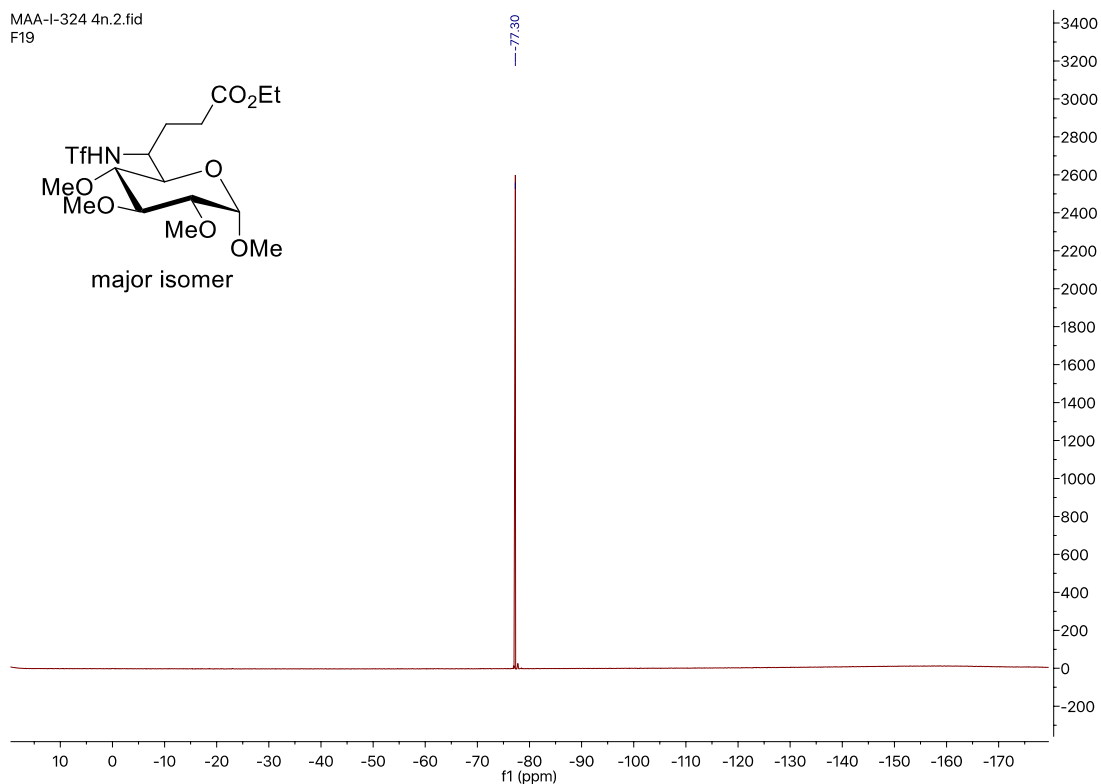

***tert*-butyl 5-((*tert*-butoxycarbonyl)amino)-4-((trifluoromethyl)sulfonamido)pentanoate (3la)**

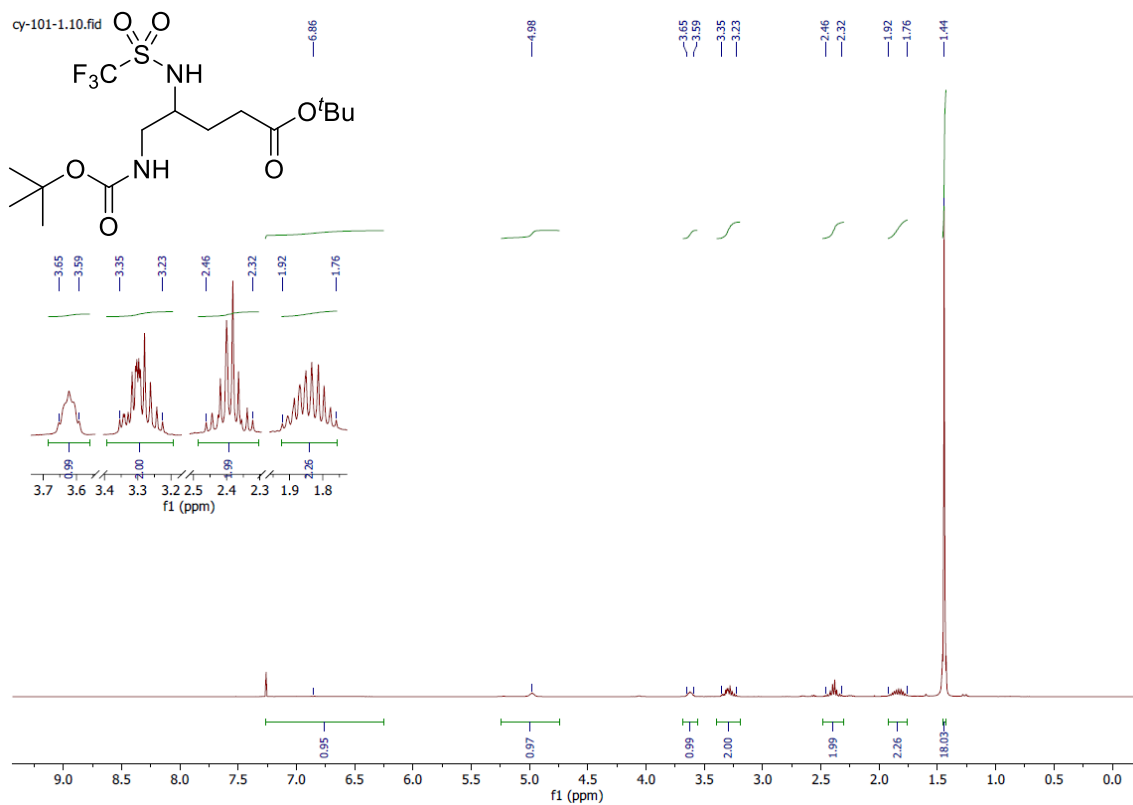

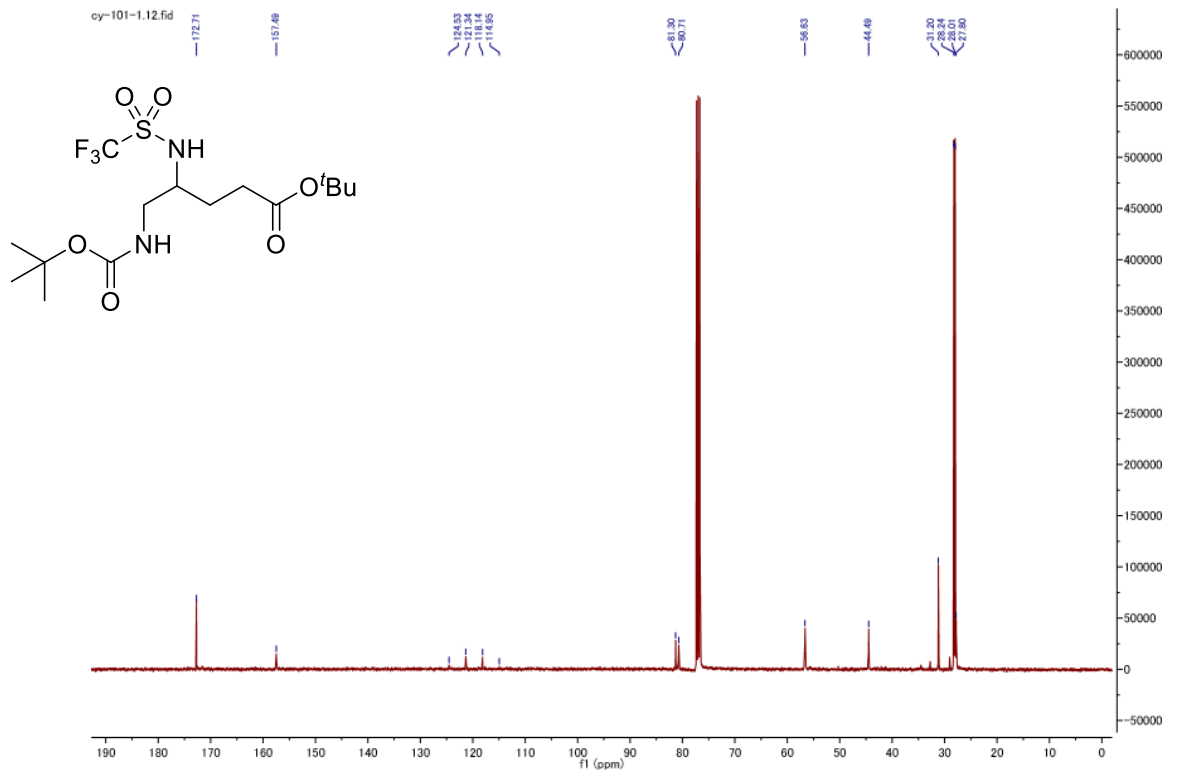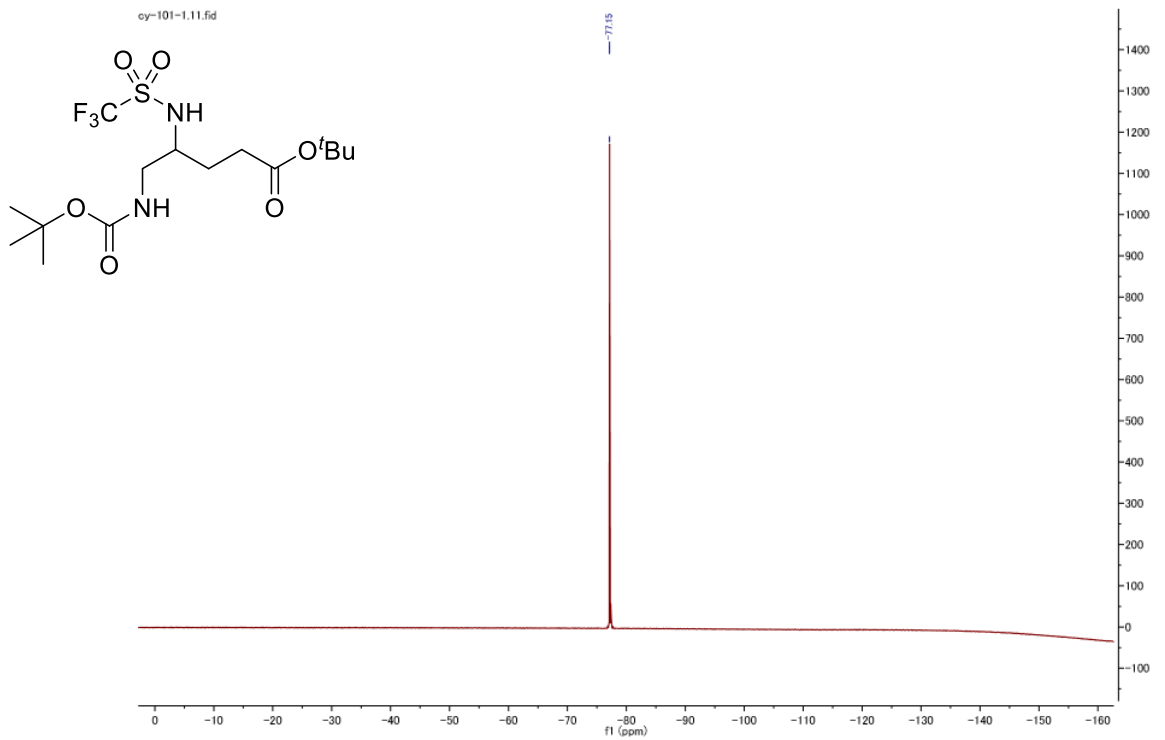

***tert*-butyl 4-(4-(*tert*-butoxy)-4-oxo-1-((trifluoromethyl)sulfonamido)butyl)piperidine-1-carboxylate**

**(3ma)**

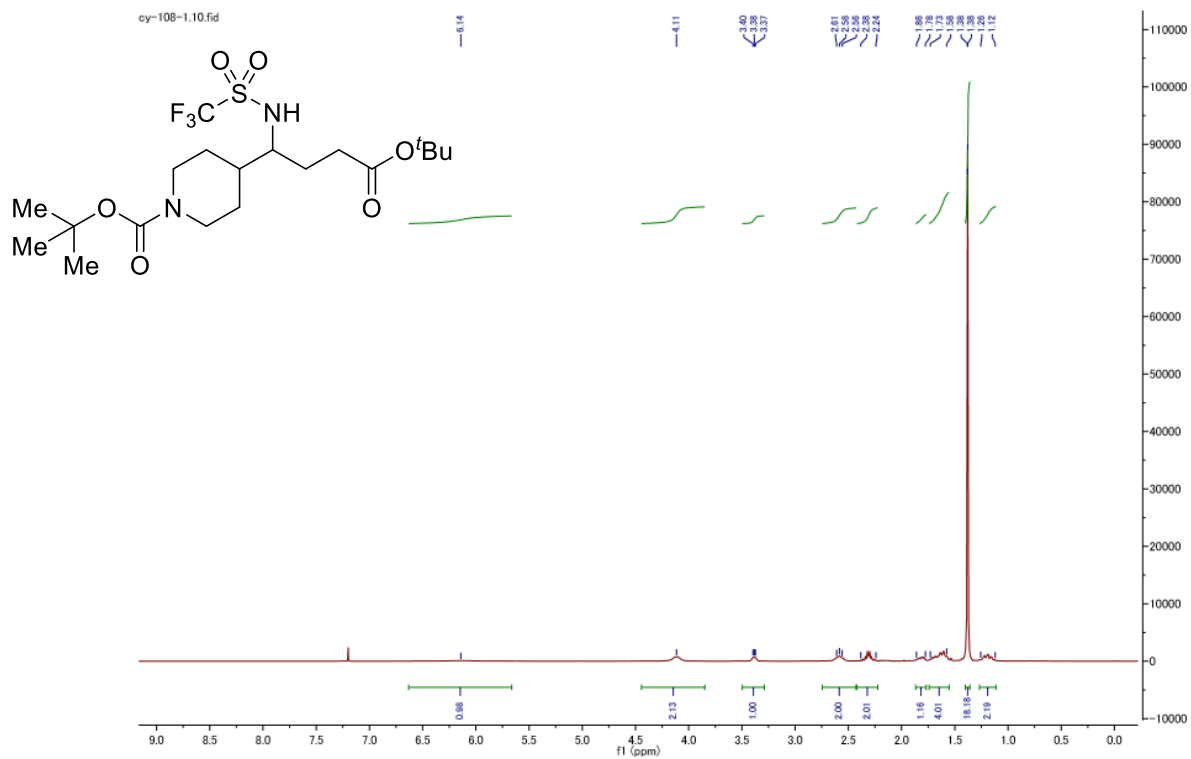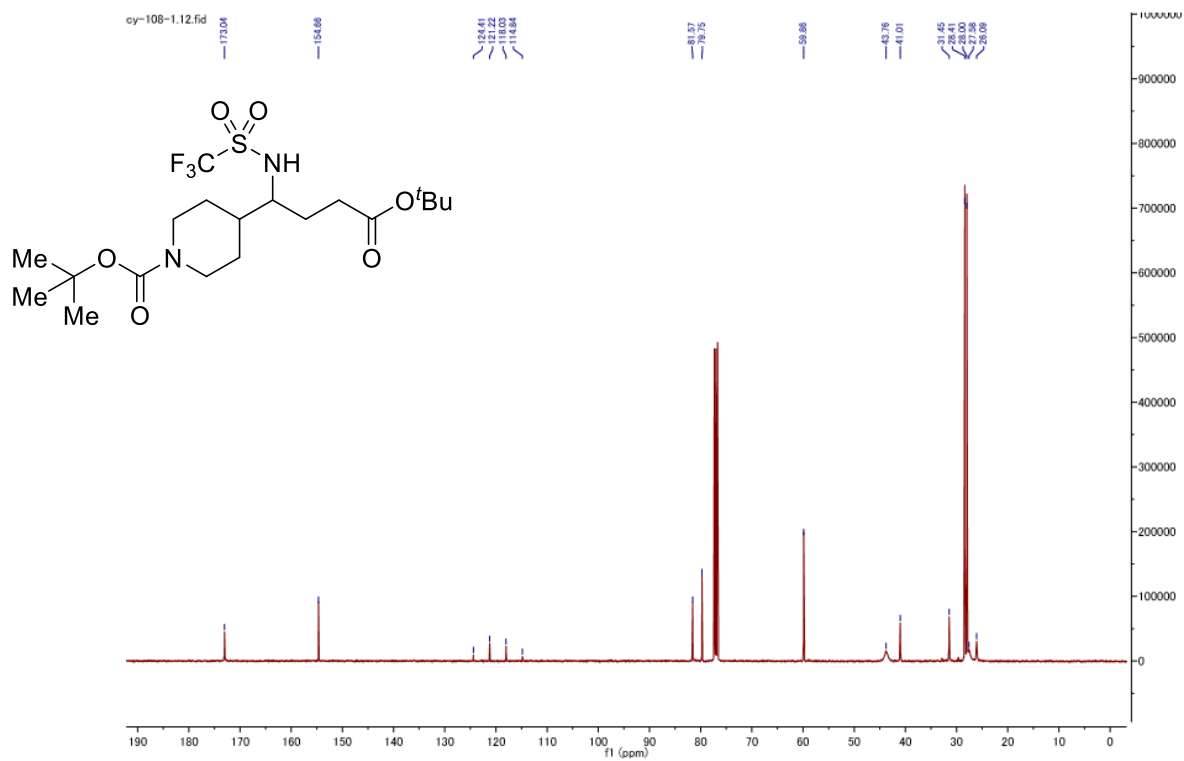

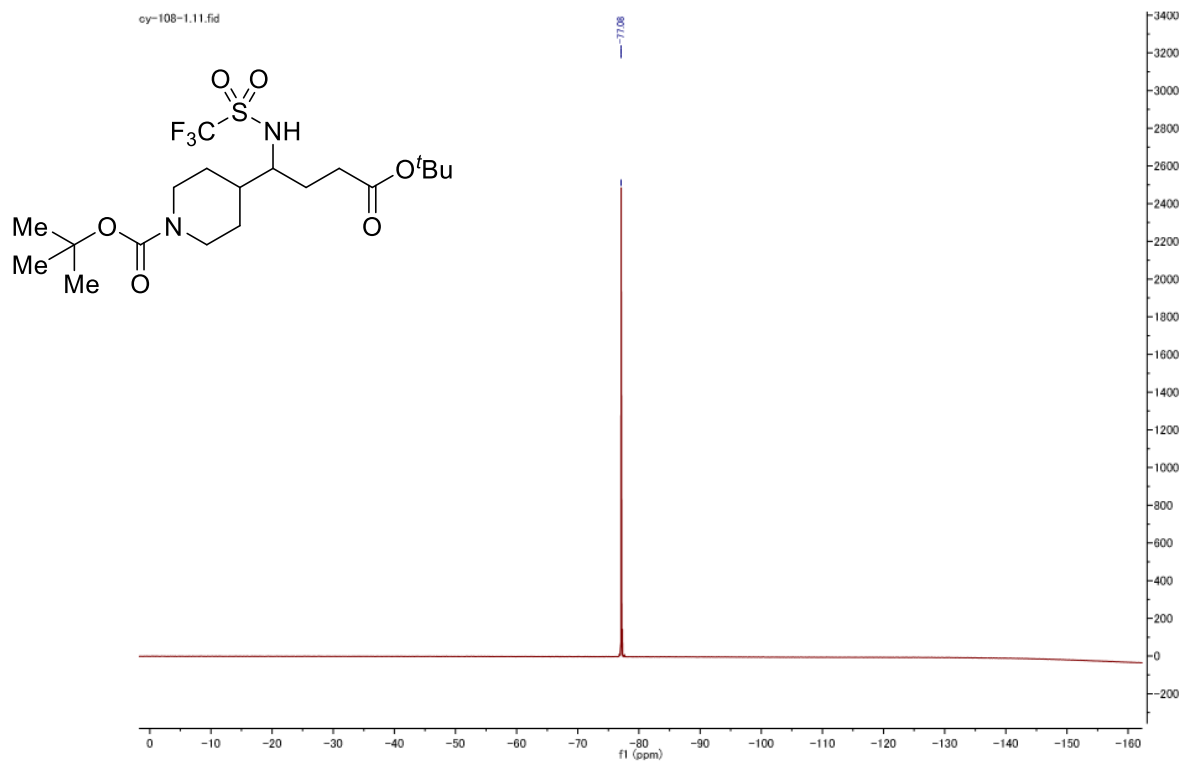

**9-(*tert*-butyl) 1-methyl (2*S*)-2-((*tert*-butoxycarbonyl)amino)-6-((trifluoromethyl)sulfonamido)nonanedioate (3na)**

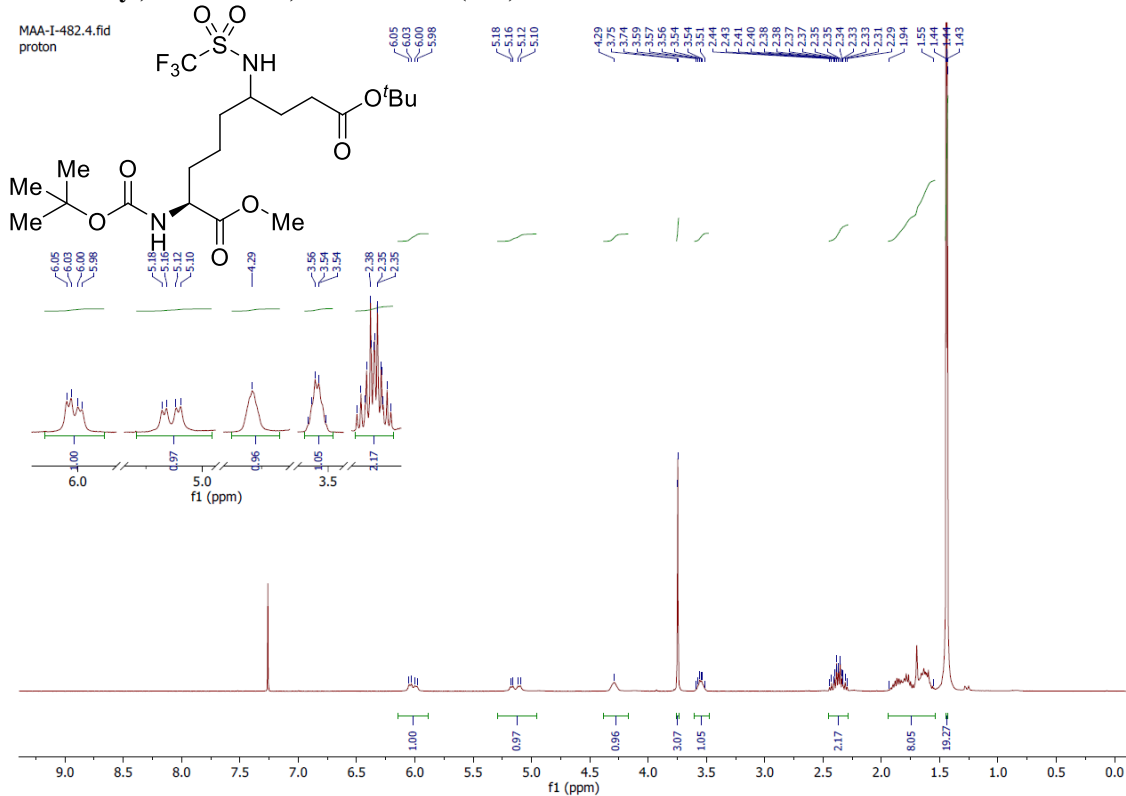

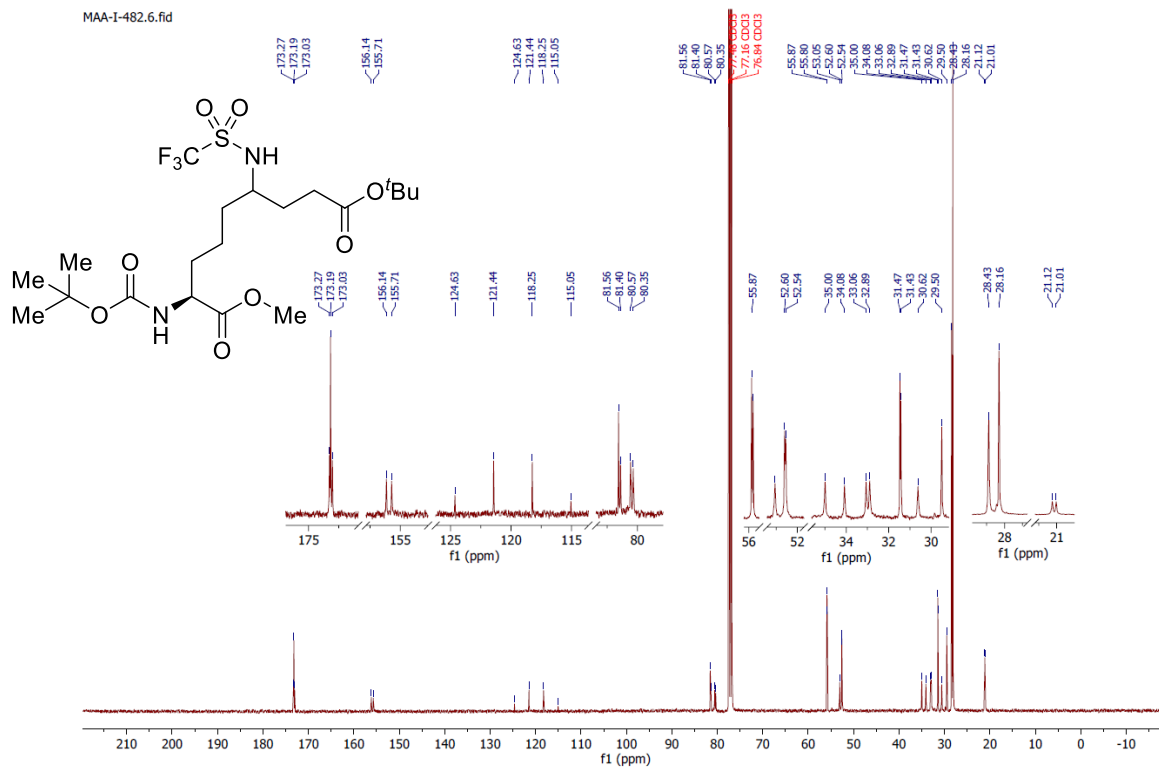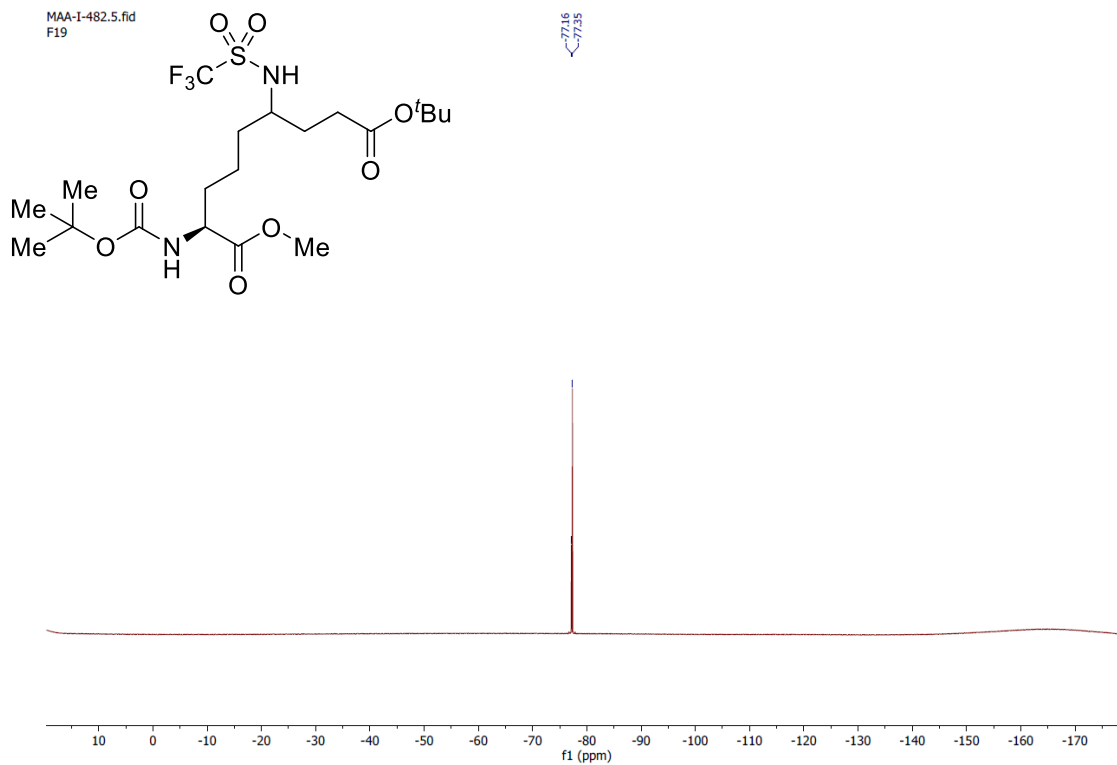

ethyl 5-(benzyloxy)-4-((trifluoromethyl)sulfonamido)pentanoate (30a)

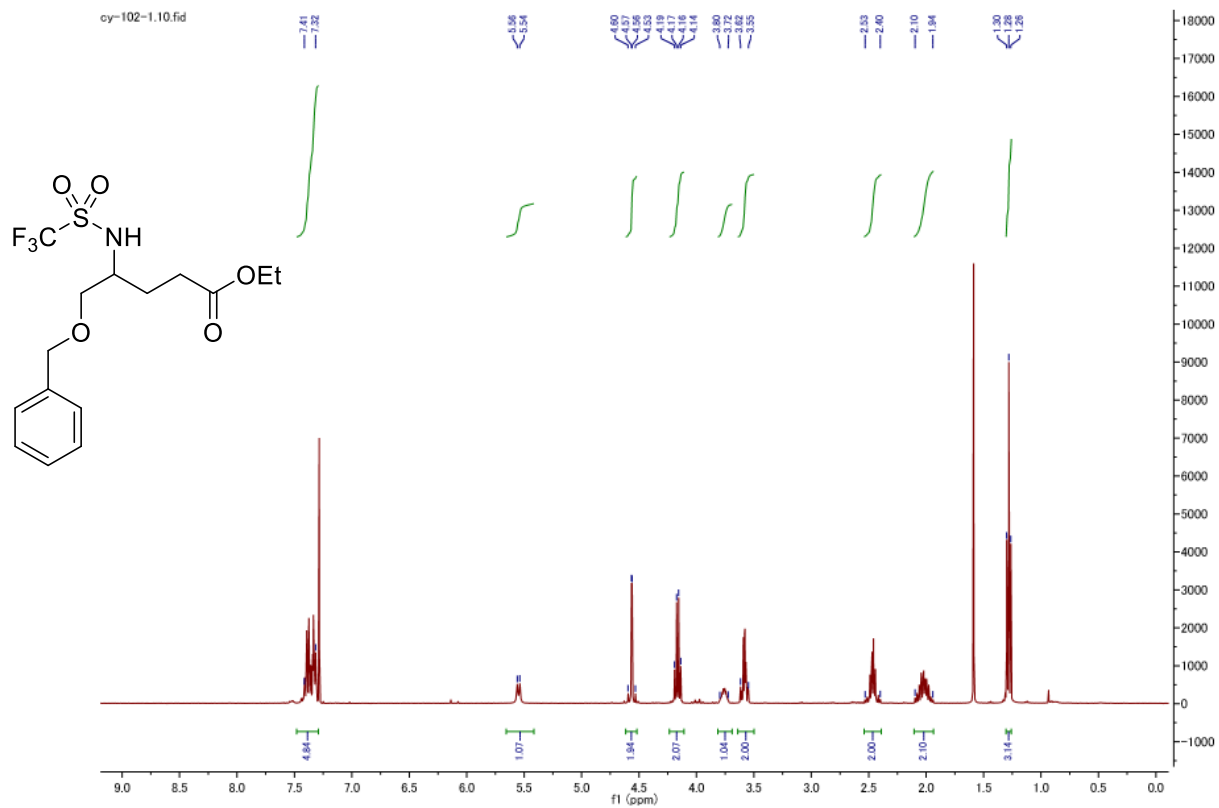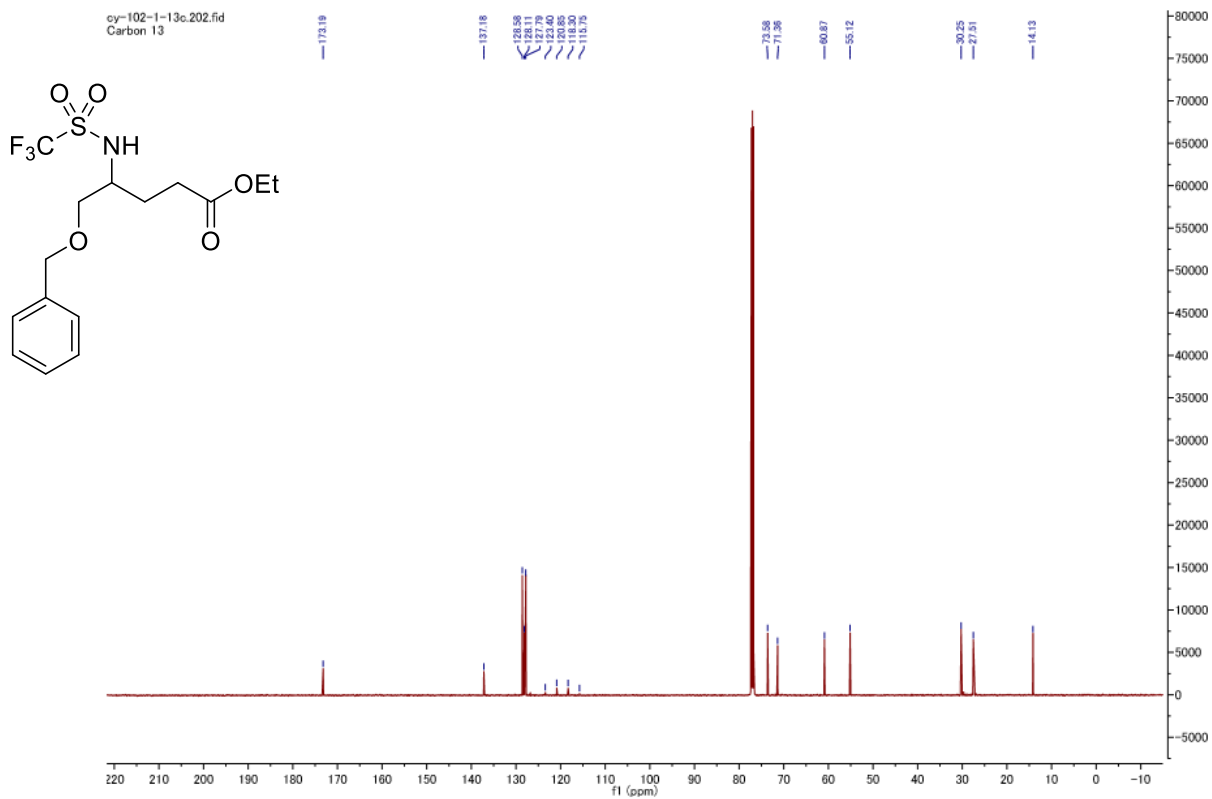

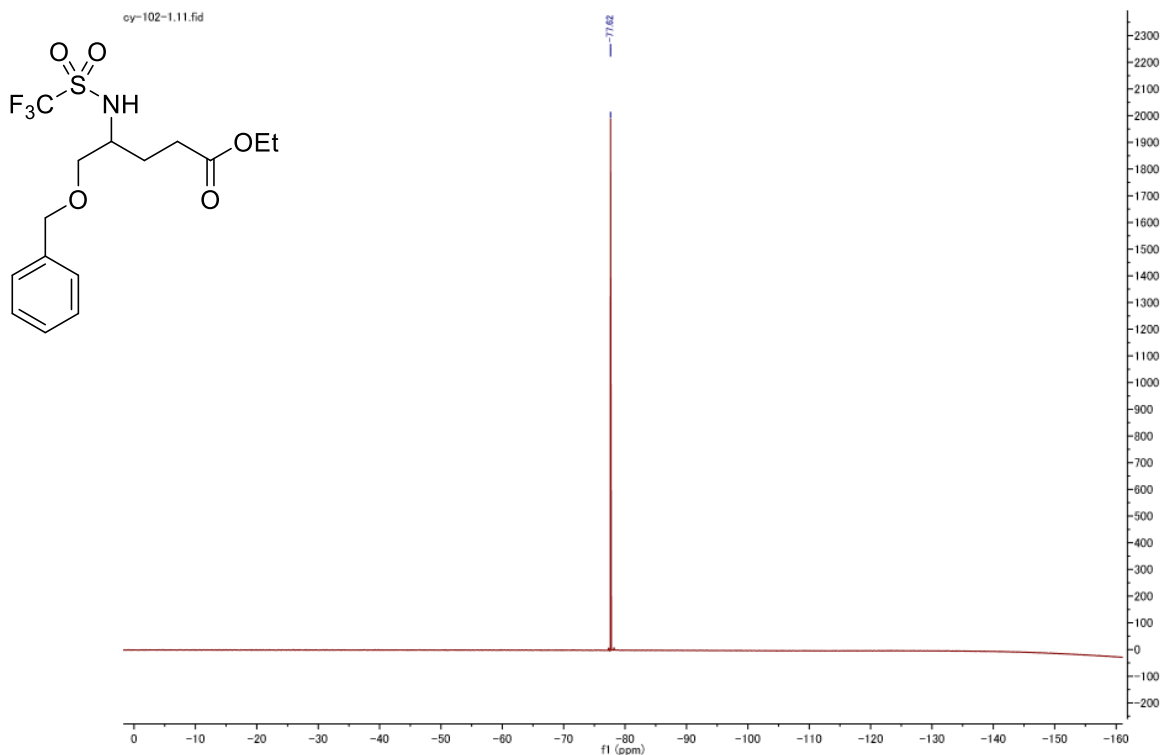

***tert*-butyl 7-phenyl-4-((trifluoromethyl)sulfonamido)heptanoate (3pa)**

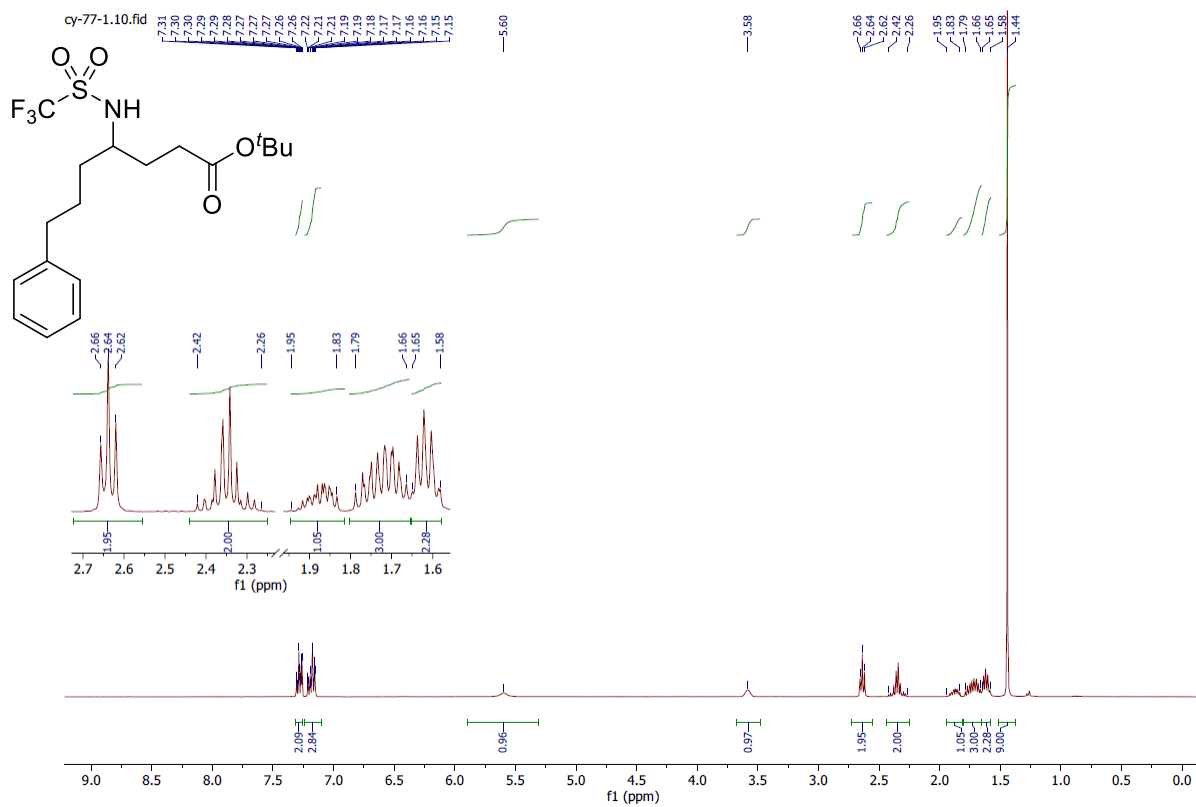



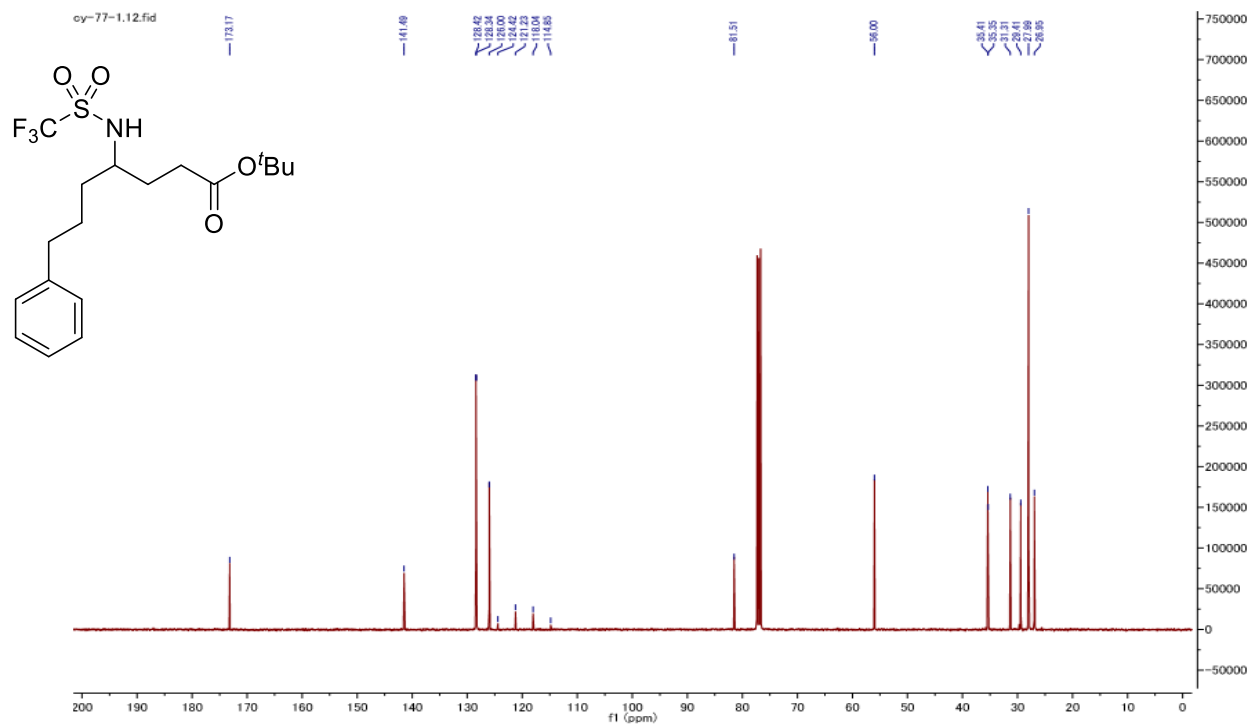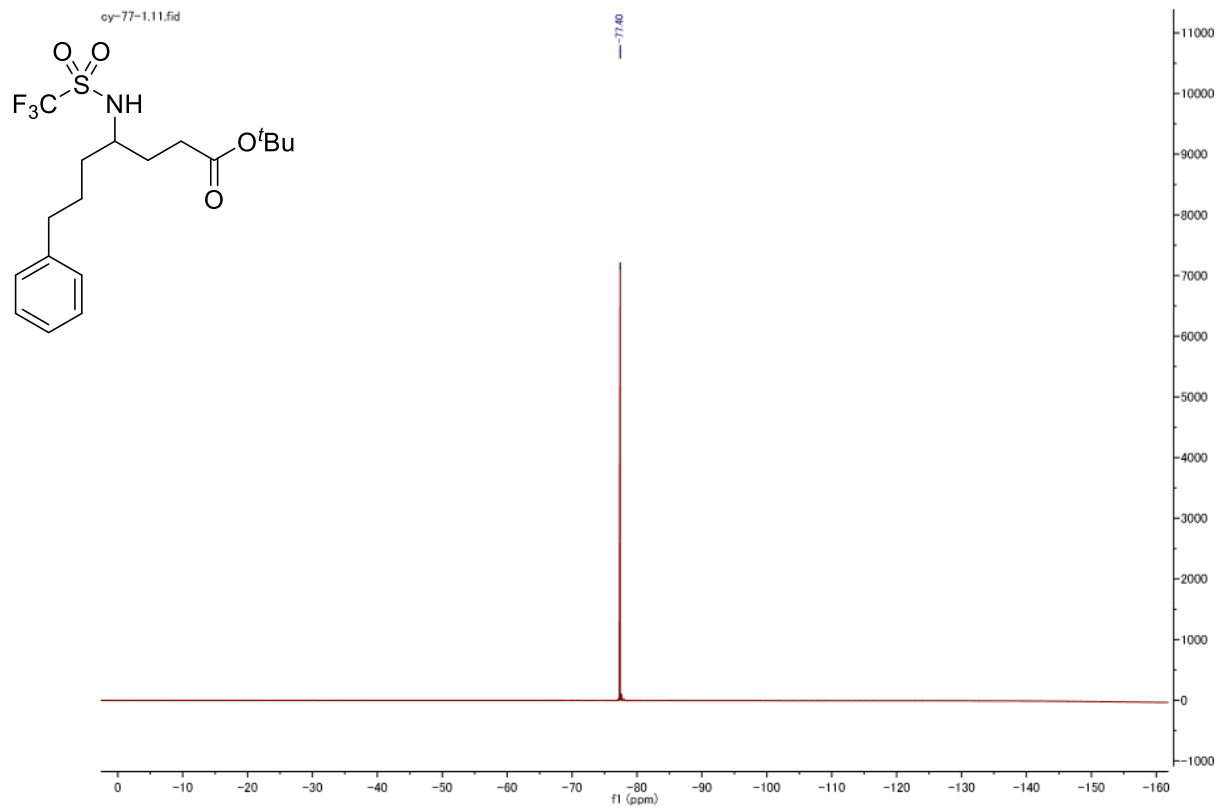

**tert-butyl 7-methyl-4-((trifluoromethyl)sulfonamido)octanoate (3qa)**

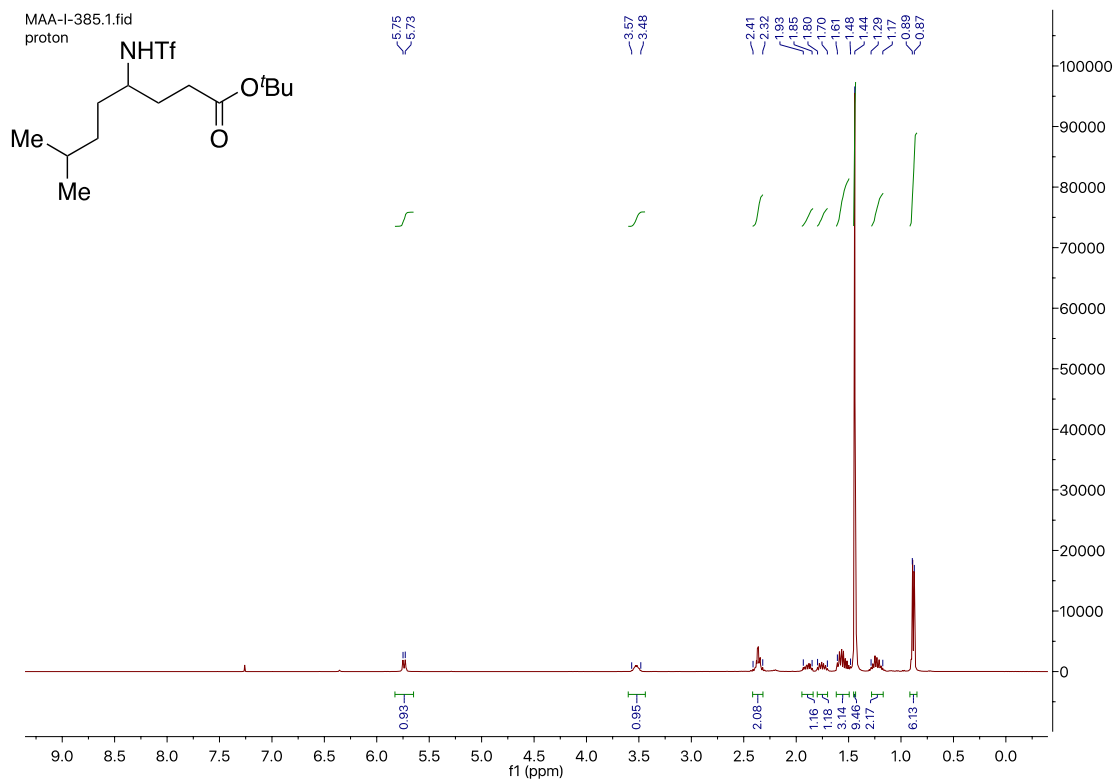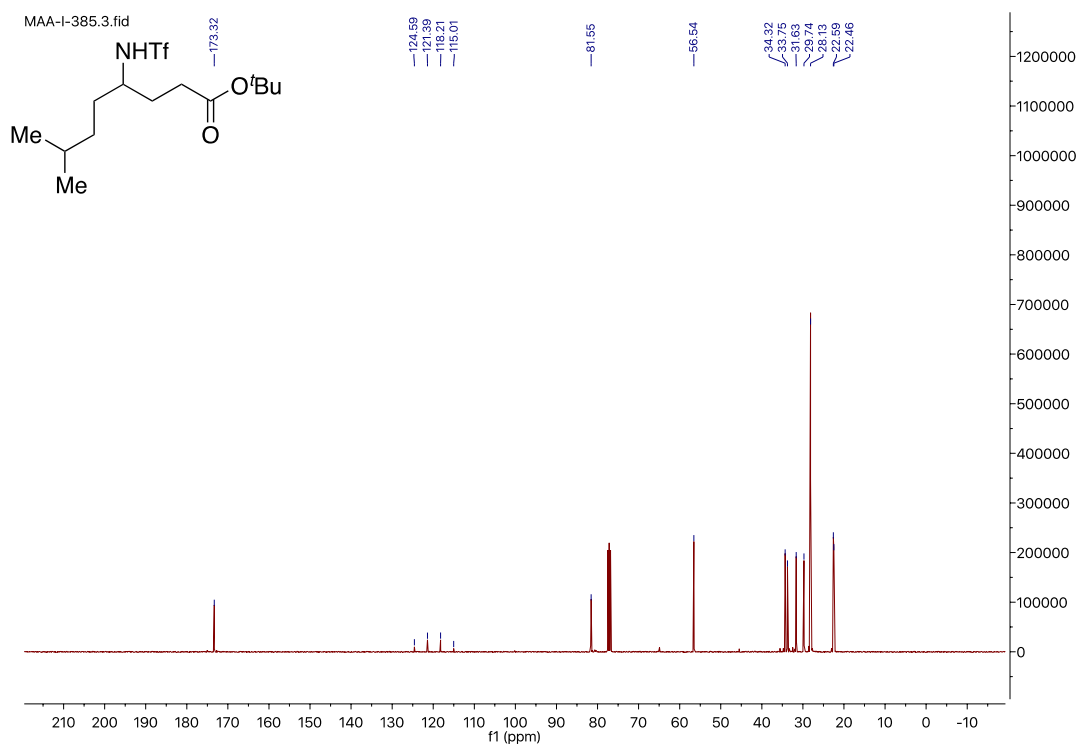

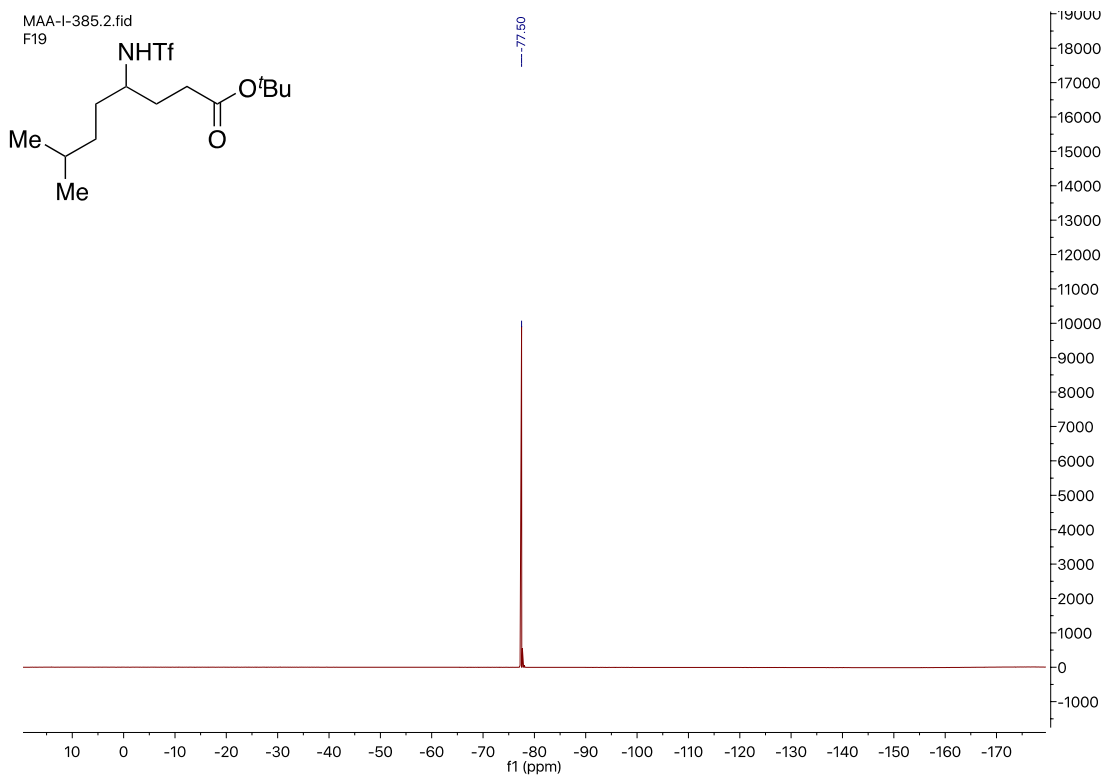

***tert*-butyl 4-((trifluoromethyl)sulfonamide)undecanoate (3a)**

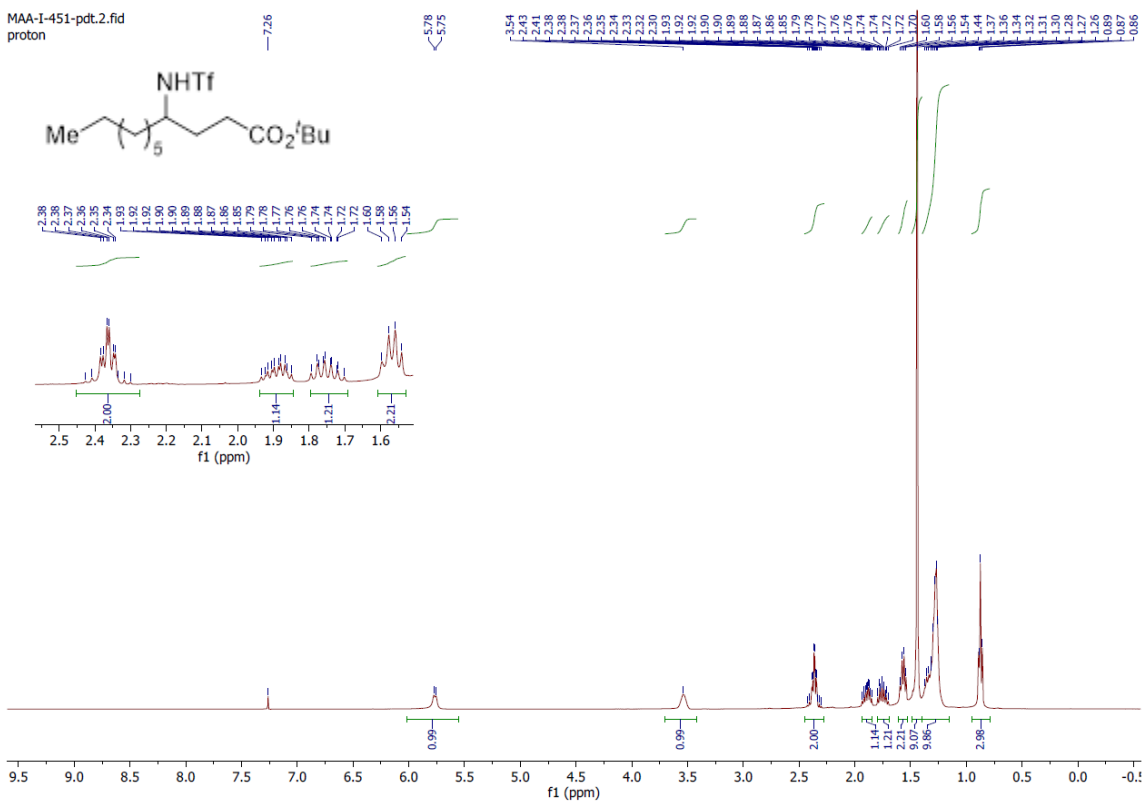

MAA-I-451-pdt.4.fid

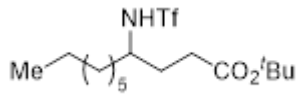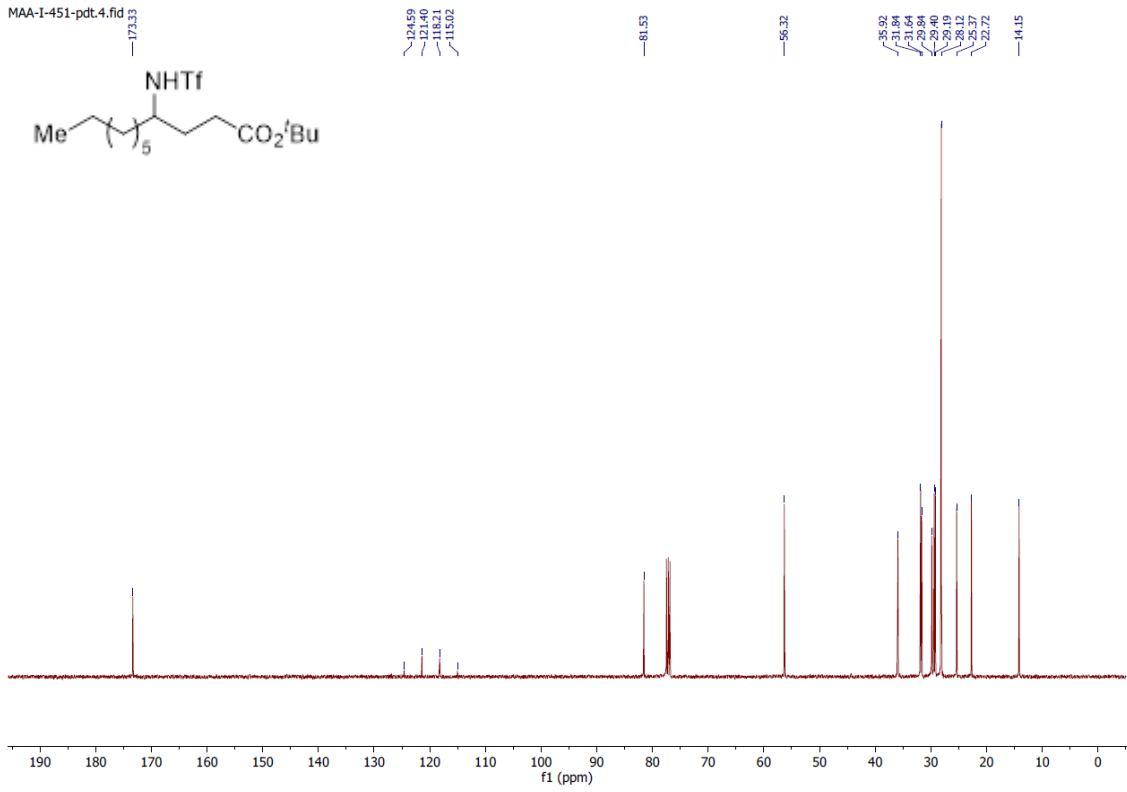

MAA-I-451-pdt.3.fid  
F19

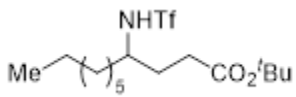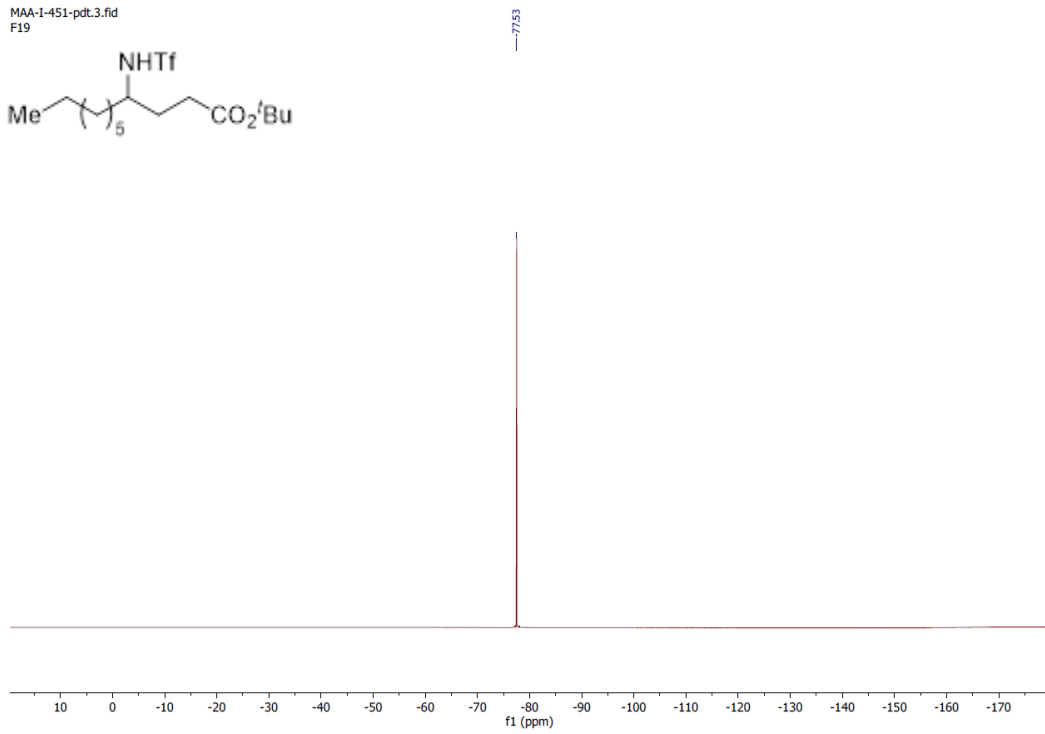

Supplement: NIHMS1014655-supplement-SI.pdf [file NIHMS1014655-supplement-SI.pdf]
